# Supplementary material for: Analysis of an all-solid state nanobattery using molecular dynamics simulations under an external electric field
Source: Royal Society of Chemistry journal article supplement (doi:10.1039/d0cp02851g), 2020-11-16
Supplement: d0cp02851g1.pdf [file d0cp02851g1.pdf]

## Supporting Information

### Analysis of an All-Solid State Nanobattery using Molecular Dynamics Simulations Under an External Electric Field

Victor Ponce<sup>1,2</sup> and Jorge M. Seminario<sup>1,2,3,\*</sup>

<sup>1</sup>Department of Chemical Engineering

<sup>2</sup>Department of Materials Science and Engineering

<sup>3</sup>Department of Electrical and Computer Engineering

Texas A&M University

College Station, TX 77843, USA

Data file:

#####beginning-of-the-data-file#####

# LAMMPS data Li7P2S8I

7944 atoms

4392 bonds

6740 angles

12 atom types

1 bond types

5 angle types

0.0 28.2918 xlo xhi

0.0 31.278 ylo yhi

-45.68833333 101.274375 zlo zhi

Masses

1 6.941000 ##Li(anode)

2 6.941000 #Li(SE)

3 6.941000 #Li(cathode)

4 30.973761 #P(SE)

5 32.66 #S(SE)

6 126.90447 #I(SE)

7 58.9332 #Co(cathode)

8 15.9994 #O(cathode)

9 26.981539 #Al(cathode)

10 63.546 #Cu(cathode)

11 6.941000 #Li(cathode-temp)

12 6.941000 ##Li(anode-temp)

Bond Coeffs

1 39.895 1.98

Atoms # full

1 1 1 0 0 0 -32.0837

|    |    |   |   |         |         |           |
|----|----|---|---|---------|---------|-----------|
| 2  | 2  | 1 | 0 | 1.75465 | 1.75465 | -30.32905 |
| 3  | 3  | 1 | 0 | 0       | 0       | -28.5744  |
| 4  | 4  | 1 | 0 | 1.75465 | 1.75465 | -26.81975 |
| 5  | 5  | 1 | 0 | 0       | 0       | -25.0651  |
| 6  | 6  | 1 | 0 | 1.75465 | 1.75465 | -23.31045 |
| 7  | 7  | 1 | 0 | 0       | 0       | -21.5558  |
| 8  | 8  | 1 | 0 | 1.75465 | 1.75465 | -19.80115 |
| 9  | 9  | 1 | 0 | 0       | 0       | -18.0465  |
| 10 | 10 | 1 | 0 | 1.75465 | 1.75465 | -16.29185 |
| 11 | 11 | 1 | 0 | 0       | 0       | -14.5372  |
| 12 | 12 | 1 | 0 | 1.75465 | 1.75465 | -12.78255 |
| 13 | 13 | 1 | 0 | 0       | 0       | -11.0279  |
| 14 | 14 | 1 | 0 | 1.75465 | 1.75465 | -9.27325  |
| 15 | 15 | 1 | 0 | 0       | 0       | -7.5186   |
| 16 | 16 | 1 | 0 | 1.75465 | 1.75465 | -5.76395  |
| 17 | 17 | 1 | 0 | 0       | 0       | -4.0093   |
| 18 | 18 | 1 | 0 | 1.75465 | 1.75465 | -2.25465  |
| 19 | 19 | 1 | 0 | 0       | 3.5093  | -32.0837  |
| 20 | 20 | 1 | 0 | 1.75465 | 5.26395 | -30.32905 |
| 21 | 21 | 1 | 0 | 0       | 3.5093  | -28.5744  |
| 22 | 22 | 1 | 0 | 1.75465 | 5.26395 | -26.81975 |
| 23 | 23 | 1 | 0 | 0       | 3.5093  | -25.0651  |
| 24 | 24 | 1 | 0 | 1.75465 | 5.26395 | -23.31045 |
| 25 | 25 | 1 | 0 | 0       | 3.5093  | -21.5558  |
| 26 | 26 | 1 | 0 | 1.75465 | 5.26395 | -19.80115 |
| 27 | 27 | 1 | 0 | 0       | 3.5093  | -18.0465  |
| 28 | 28 | 1 | 0 | 1.75465 | 5.26395 | -16.29185 |
| 29 | 29 | 1 | 0 | 0       | 3.5093  | -14.5372  |
| 30 | 30 | 1 | 0 | 1.75465 | 5.26395 | -12.78255 |
| 31 | 31 | 1 | 0 | 0       | 3.5093  | -11.0279  |
| 32 | 32 | 1 | 0 | 1.75465 | 5.26395 | -9.27325  |
| 33 | 33 | 1 | 0 | 0       | 3.5093  | -7.5186   |
| 34 | 34 | 1 | 0 | 1.75465 | 5.26395 | -5.76395  |
| 35 | 35 | 1 | 0 | 0       | 3.5093  | -4.0093   |
| 36 | 36 | 1 | 0 | 1.75465 | 5.26395 | -2.25465  |
| 37 | 37 | 1 | 0 | 0       | 7.0186  | -32.0837  |
| 38 | 38 | 1 | 0 | 1.75465 | 8.77325 | -30.32905 |
| 39 | 39 | 1 | 0 | 0       | 7.0186  | -28.5744  |
| 40 | 40 | 1 | 0 | 1.75465 | 8.77325 | -26.81975 |
| 41 | 41 | 1 | 0 | 0       | 7.0186  | -25.0651  |
| 42 | 42 | 1 | 0 | 1.75465 | 8.77325 | -23.31045 |
| 43 | 43 | 1 | 0 | 0       | 7.0186  | -21.5558  |
| 44 | 44 | 1 | 0 | 1.75465 | 8.77325 | -19.80115 |
| 45 | 45 | 1 | 0 | 0       | 7.0186  | -18.0465  |
| 46 | 46 | 1 | 0 | 1.75465 | 8.77325 | -16.29185 |
| 47 | 47 | 1 | 0 | 0       | 7.0186  | -14.5372  |
| 48 | 48 | 1 | 0 | 1.75465 | 8.77325 | -12.78255 |
| 49 | 49 | 1 | 0 | 0       | 7.0186  | -11.0279  |
| 50 | 50 | 1 | 0 | 1.75465 | 8.77325 | -9.27325  |
| 51 | 51 | 1 | 0 | 0       | 7.0186  | -7.5186   |
| 52 | 52 | 1 | 0 | 1.75465 | 8.77325 | -5.76395  |

|     |     |   |   |         |          |           |
|-----|-----|---|---|---------|----------|-----------|
| 53  | 53  | 1 | 0 | 0       | 7.0186   | -4.0093   |
| 54  | 54  | 1 | 0 | 1.75465 | 8.77325  | -2.25465  |
| 55  | 55  | 1 | 0 | 0       | 10.5279  | -32.0837  |
| 56  | 56  | 1 | 0 | 1.75465 | 12.28255 | -30.32905 |
| 57  | 57  | 1 | 0 | 0       | 10.5279  | -28.5744  |
| 58  | 58  | 1 | 0 | 1.75465 | 12.28255 | -26.81975 |
| 59  | 59  | 1 | 0 | 0       | 10.5279  | -25.0651  |
| 60  | 60  | 1 | 0 | 1.75465 | 12.28255 | -23.31045 |
| 61  | 61  | 1 | 0 | 0       | 10.5279  | -21.5558  |
| 62  | 62  | 1 | 0 | 1.75465 | 12.28255 | -19.80115 |
| 63  | 63  | 1 | 0 | 0       | 10.5279  | -18.0465  |
| 64  | 64  | 1 | 0 | 1.75465 | 12.28255 | -16.29185 |
| 65  | 65  | 1 | 0 | 0       | 10.5279  | -14.5372  |
| 66  | 66  | 1 | 0 | 1.75465 | 12.28255 | -12.78255 |
| 67  | 67  | 1 | 0 | 0       | 10.5279  | -11.0279  |
| 68  | 68  | 1 | 0 | 1.75465 | 12.28255 | -9.27325  |
| 69  | 69  | 1 | 0 | 0       | 10.5279  | -7.5186   |
| 70  | 70  | 1 | 0 | 1.75465 | 12.28255 | -5.76395  |
| 71  | 71  | 1 | 0 | 0       | 10.5279  | -4.0093   |
| 72  | 72  | 1 | 0 | 1.75465 | 12.28255 | -2.25465  |
| 73  | 73  | 1 | 0 | 0       | 14.0372  | -32.0837  |
| 74  | 74  | 1 | 0 | 1.75465 | 15.79185 | -30.32905 |
| 75  | 75  | 1 | 0 | 0       | 14.0372  | -28.5744  |
| 76  | 76  | 1 | 0 | 1.75465 | 15.79185 | -26.81975 |
| 77  | 77  | 1 | 0 | 0       | 14.0372  | -25.0651  |
| 78  | 78  | 1 | 0 | 1.75465 | 15.79185 | -23.31045 |
| 79  | 79  | 1 | 0 | 0       | 14.0372  | -21.5558  |
| 80  | 80  | 1 | 0 | 1.75465 | 15.79185 | -19.80115 |
| 81  | 81  | 1 | 0 | 0       | 14.0372  | -18.0465  |
| 82  | 82  | 1 | 0 | 1.75465 | 15.79185 | -16.29185 |
| 83  | 83  | 1 | 0 | 0       | 14.0372  | -14.5372  |
| 84  | 84  | 1 | 0 | 1.75465 | 15.79185 | -12.78255 |
| 85  | 85  | 1 | 0 | 0       | 14.0372  | -11.0279  |
| 86  | 86  | 1 | 0 | 1.75465 | 15.79185 | -9.27325  |
| 87  | 87  | 1 | 0 | 0       | 14.0372  | -7.5186   |
| 88  | 88  | 1 | 0 | 1.75465 | 15.79185 | -5.76395  |
| 89  | 89  | 1 | 0 | 0       | 14.0372  | -4.0093   |
| 90  | 90  | 1 | 0 | 1.75465 | 15.79185 | -2.25465  |
| 91  | 91  | 1 | 0 | 0       | 17.5465  | -32.0837  |
| 92  | 92  | 1 | 0 | 1.75465 | 19.30115 | -30.32905 |
| 93  | 93  | 1 | 0 | 0       | 17.5465  | -28.5744  |
| 94  | 94  | 1 | 0 | 1.75465 | 19.30115 | -26.81975 |
| 95  | 95  | 1 | 0 | 0       | 17.5465  | -25.0651  |
| 96  | 96  | 1 | 0 | 1.75465 | 19.30115 | -23.31045 |
| 97  | 97  | 1 | 0 | 0       | 17.5465  | -21.5558  |
| 98  | 98  | 1 | 0 | 1.75465 | 19.30115 | -19.80115 |
| 99  | 99  | 1 | 0 | 0       | 17.5465  | -18.0465  |
| 100 | 100 | 1 | 0 | 1.75465 | 19.30115 | -16.29185 |
| 101 | 101 | 1 | 0 | 0       | 17.5465  | -14.5372  |
| 102 | 102 | 1 | 0 | 1.75465 | 19.30115 | -12.78255 |
| 103 | 103 | 1 | 0 | 0       | 17.5465  | -11.0279  |

|     |     |   |   |         |          |           |
|-----|-----|---|---|---------|----------|-----------|
| 104 | 104 | 1 | 0 | 1.75465 | 19.30115 | -9.27325  |
| 105 | 105 | 1 | 0 | 0       | 17.5465  | -7.5186   |
| 106 | 106 | 1 | 0 | 1.75465 | 19.30115 | -5.76395  |
| 107 | 107 | 1 | 0 | 0       | 17.5465  | -4.0093   |
| 108 | 108 | 1 | 0 | 1.75465 | 19.30115 | -2.25465  |
| 109 | 109 | 1 | 0 | 0       | 21.0558  | -32.0837  |
| 110 | 110 | 1 | 0 | 1.75465 | 22.81045 | -30.32905 |
| 111 | 111 | 1 | 0 | 0       | 21.0558  | -28.5744  |
| 112 | 112 | 1 | 0 | 1.75465 | 22.81045 | -26.81975 |
| 113 | 113 | 1 | 0 | 0       | 21.0558  | -25.0651  |
| 114 | 114 | 1 | 0 | 1.75465 | 22.81045 | -23.31045 |
| 115 | 115 | 1 | 0 | 0       | 21.0558  | -21.5558  |
| 116 | 116 | 1 | 0 | 1.75465 | 22.81045 | -19.80115 |
| 117 | 117 | 1 | 0 | 0       | 21.0558  | -18.0465  |
| 118 | 118 | 1 | 0 | 1.75465 | 22.81045 | -16.29185 |
| 119 | 119 | 1 | 0 | 0       | 21.0558  | -14.5372  |
| 120 | 120 | 1 | 0 | 1.75465 | 22.81045 | -12.78255 |
| 121 | 121 | 1 | 0 | 0       | 21.0558  | -11.0279  |
| 122 | 122 | 1 | 0 | 1.75465 | 22.81045 | -9.27325  |
| 123 | 123 | 1 | 0 | 0       | 21.0558  | -7.5186   |
| 124 | 124 | 1 | 0 | 1.75465 | 22.81045 | -5.76395  |
| 125 | 125 | 1 | 0 | 0       | 21.0558  | -4.0093   |
| 126 | 126 | 1 | 0 | 1.75465 | 22.81045 | -2.25465  |
| 127 | 127 | 1 | 0 | 0       | 24.5651  | -32.0837  |
| 128 | 128 | 1 | 0 | 1.75465 | 26.31975 | -30.32905 |
| 129 | 129 | 1 | 0 | 0       | 24.5651  | -28.5744  |
| 130 | 130 | 1 | 0 | 1.75465 | 26.31975 | -26.81975 |
| 131 | 131 | 1 | 0 | 0       | 24.5651  | -25.0651  |
| 132 | 132 | 1 | 0 | 1.75465 | 26.31975 | -23.31045 |
| 133 | 133 | 1 | 0 | 0       | 24.5651  | -21.5558  |
| 134 | 134 | 1 | 0 | 1.75465 | 26.31975 | -19.80115 |
| 135 | 135 | 1 | 0 | 0       | 24.5651  | -18.0465  |
| 136 | 136 | 1 | 0 | 1.75465 | 26.31975 | -16.29185 |
| 137 | 137 | 1 | 0 | 0       | 24.5651  | -14.5372  |
| 138 | 138 | 1 | 0 | 1.75465 | 26.31975 | -12.78255 |
| 139 | 139 | 1 | 0 | 0       | 24.5651  | -11.0279  |
| 140 | 140 | 1 | 0 | 1.75465 | 26.31975 | -9.27325  |
| 141 | 141 | 1 | 0 | 0       | 24.5651  | -7.5186   |
| 142 | 142 | 1 | 0 | 1.75465 | 26.31975 | -5.76395  |
| 143 | 143 | 1 | 0 | 0       | 24.5651  | -4.0093   |
| 144 | 144 | 1 | 0 | 1.75465 | 26.31975 | -2.25465  |
| 145 | 145 | 1 | 0 | 0       | 28.0744  | -32.0837  |
| 146 | 146 | 1 | 0 | 1.75465 | 29.82905 | -30.32905 |
| 147 | 147 | 1 | 0 | 0       | 28.0744  | -28.5744  |
| 148 | 148 | 1 | 0 | 1.75465 | 29.82905 | -26.81975 |
| 149 | 149 | 1 | 0 | 0       | 28.0744  | -25.0651  |
| 150 | 150 | 1 | 0 | 1.75465 | 29.82905 | -23.31045 |
| 151 | 151 | 1 | 0 | 0       | 28.0744  | -21.5558  |
| 152 | 152 | 1 | 0 | 1.75465 | 29.82905 | -19.80115 |
| 153 | 153 | 1 | 0 | 0       | 28.0744  | -18.0465  |
| 154 | 154 | 1 | 0 | 1.75465 | 29.82905 | -16.29185 |

|     |     |   |   |         |          |           |
|-----|-----|---|---|---------|----------|-----------|
| 155 | 155 | 1 | 0 | 0       | 28.0744  | -14.5372  |
| 156 | 156 | 1 | 0 | 1.75465 | 29.82905 | -12.78255 |
| 157 | 157 | 1 | 0 | 0       | 28.0744  | -11.0279  |
| 158 | 158 | 1 | 0 | 1.75465 | 29.82905 | -9.27325  |
| 159 | 159 | 1 | 0 | 0       | 28.0744  | -7.5186   |
| 160 | 160 | 1 | 0 | 1.75465 | 29.82905 | -5.76395  |
| 161 | 161 | 1 | 0 | 0       | 28.0744  | -4.0093   |
| 162 | 162 | 1 | 0 | 1.75465 | 29.82905 | -2.25465  |
| 163 | 163 | 1 | 0 | 3.5093  | 0        | -32.0837  |
| 164 | 164 | 1 | 0 | 5.26395 | 1.75465  | -30.32905 |
| 165 | 165 | 1 | 0 | 3.5093  | 0        | -28.5744  |
| 166 | 166 | 1 | 0 | 5.26395 | 1.75465  | -26.81975 |
| 167 | 167 | 1 | 0 | 3.5093  | 0        | -25.0651  |
| 168 | 168 | 1 | 0 | 5.26395 | 1.75465  | -23.31045 |
| 169 | 169 | 1 | 0 | 3.5093  | 0        | -21.5558  |
| 170 | 170 | 1 | 0 | 5.26395 | 1.75465  | -19.80115 |
| 171 | 171 | 1 | 0 | 3.5093  | 0        | -18.0465  |
| 172 | 172 | 1 | 0 | 5.26395 | 1.75465  | -16.29185 |
| 173 | 173 | 1 | 0 | 3.5093  | 0        | -14.5372  |
| 174 | 174 | 1 | 0 | 5.26395 | 1.75465  | -12.78255 |
| 175 | 175 | 1 | 0 | 3.5093  | 0        | -11.0279  |
| 176 | 176 | 1 | 0 | 5.26395 | 1.75465  | -9.27325  |
| 177 | 177 | 1 | 0 | 3.5093  | 0        | -7.5186   |
| 178 | 178 | 1 | 0 | 5.26395 | 1.75465  | -5.76395  |
| 179 | 179 | 1 | 0 | 3.5093  | 0        | -4.0093   |
| 180 | 180 | 1 | 0 | 5.26395 | 1.75465  | -2.25465  |
| 181 | 181 | 1 | 0 | 3.5093  | 3.5093   | -32.0837  |
| 182 | 182 | 1 | 0 | 5.26395 | 5.26395  | -30.32905 |
| 183 | 183 | 1 | 0 | 3.5093  | 3.5093   | -28.5744  |
| 184 | 184 | 1 | 0 | 5.26395 | 5.26395  | -26.81975 |
| 185 | 185 | 1 | 0 | 3.5093  | 3.5093   | -25.0651  |
| 186 | 186 | 1 | 0 | 5.26395 | 5.26395  | -23.31045 |
| 187 | 187 | 1 | 0 | 3.5093  | 3.5093   | -21.5558  |
| 188 | 188 | 1 | 0 | 5.26395 | 5.26395  | -19.80115 |
| 189 | 189 | 1 | 0 | 3.5093  | 3.5093   | -18.0465  |
| 190 | 190 | 1 | 0 | 5.26395 | 5.26395  | -16.29185 |
| 191 | 191 | 1 | 0 | 3.5093  | 3.5093   | -14.5372  |
| 192 | 192 | 1 | 0 | 5.26395 | 5.26395  | -12.78255 |
| 193 | 193 | 1 | 0 | 3.5093  | 3.5093   | -11.0279  |
| 194 | 194 | 1 | 0 | 5.26395 | 5.26395  | -9.27325  |
| 195 | 195 | 1 | 0 | 3.5093  | 3.5093   | -7.5186   |
| 196 | 196 | 1 | 0 | 5.26395 | 5.26395  | -5.76395  |
| 197 | 197 | 1 | 0 | 3.5093  | 3.5093   | -4.0093   |
| 198 | 198 | 1 | 0 | 5.26395 | 5.26395  | -2.25465  |
| 199 | 199 | 1 | 0 | 3.5093  | 7.0186   | -32.0837  |
| 200 | 200 | 1 | 0 | 5.26395 | 8.77325  | -30.32905 |
| 201 | 201 | 1 | 0 | 3.5093  | 7.0186   | -28.5744  |
| 202 | 202 | 1 | 0 | 5.26395 | 8.77325  | -26.81975 |
| 203 | 203 | 1 | 0 | 3.5093  | 7.0186   | -25.0651  |
| 204 | 204 | 1 | 0 | 5.26395 | 8.77325  | -23.31045 |
| 205 | 205 | 1 | 0 | 3.5093  | 7.0186   | -21.5558  |

|     |     |   |   |         |          |           |
|-----|-----|---|---|---------|----------|-----------|
| 206 | 206 | 1 | 0 | 5.26395 | 8.77325  | -19.80115 |
| 207 | 207 | 1 | 0 | 3.5093  | 7.0186   | -18.0465  |
| 208 | 208 | 1 | 0 | 5.26395 | 8.77325  | -16.29185 |
| 209 | 209 | 1 | 0 | 3.5093  | 7.0186   | -14.5372  |
| 210 | 210 | 1 | 0 | 5.26395 | 8.77325  | -12.78255 |
| 211 | 211 | 1 | 0 | 3.5093  | 7.0186   | -11.0279  |
| 212 | 212 | 1 | 0 | 5.26395 | 8.77325  | -9.27325  |
| 213 | 213 | 1 | 0 | 3.5093  | 7.0186   | -7.5186   |
| 214 | 214 | 1 | 0 | 5.26395 | 8.77325  | -5.76395  |
| 215 | 215 | 1 | 0 | 3.5093  | 7.0186   | -4.0093   |
| 216 | 216 | 1 | 0 | 5.26395 | 8.77325  | -2.25465  |
| 217 | 217 | 1 | 0 | 3.5093  | 10.5279  | -32.0837  |
| 218 | 218 | 1 | 0 | 5.26395 | 12.28255 | -30.32905 |
| 219 | 219 | 1 | 0 | 3.5093  | 10.5279  | -28.5744  |
| 220 | 220 | 1 | 0 | 5.26395 | 12.28255 | -26.81975 |
| 221 | 221 | 1 | 0 | 3.5093  | 10.5279  | -25.0651  |
| 222 | 222 | 1 | 0 | 5.26395 | 12.28255 | -23.31045 |
| 223 | 223 | 1 | 0 | 3.5093  | 10.5279  | -21.5558  |
| 224 | 224 | 1 | 0 | 5.26395 | 12.28255 | -19.80115 |
| 225 | 225 | 1 | 0 | 3.5093  | 10.5279  | -18.0465  |
| 226 | 226 | 1 | 0 | 5.26395 | 12.28255 | -16.29185 |
| 227 | 227 | 1 | 0 | 3.5093  | 10.5279  | -14.5372  |
| 228 | 228 | 1 | 0 | 5.26395 | 12.28255 | -12.78255 |
| 229 | 229 | 1 | 0 | 3.5093  | 10.5279  | -11.0279  |
| 230 | 230 | 1 | 0 | 5.26395 | 12.28255 | -9.27325  |
| 231 | 231 | 1 | 0 | 3.5093  | 10.5279  | -7.5186   |
| 232 | 232 | 1 | 0 | 5.26395 | 12.28255 | -5.76395  |
| 233 | 233 | 1 | 0 | 3.5093  | 10.5279  | -4.0093   |
| 234 | 234 | 1 | 0 | 5.26395 | 12.28255 | -2.25465  |
| 235 | 235 | 1 | 0 | 3.5093  | 14.0372  | -32.0837  |
| 236 | 236 | 1 | 0 | 5.26395 | 15.79185 | -30.32905 |
| 237 | 237 | 1 | 0 | 3.5093  | 14.0372  | -28.5744  |
| 238 | 238 | 1 | 0 | 5.26395 | 15.79185 | -26.81975 |
| 239 | 239 | 1 | 0 | 3.5093  | 14.0372  | -25.0651  |
| 240 | 240 | 1 | 0 | 5.26395 | 15.79185 | -23.31045 |
| 241 | 241 | 1 | 0 | 3.5093  | 14.0372  | -21.5558  |
| 242 | 242 | 1 | 0 | 5.26395 | 15.79185 | -19.80115 |
| 243 | 243 | 1 | 0 | 3.5093  | 14.0372  | -18.0465  |
| 244 | 244 | 1 | 0 | 5.26395 | 15.79185 | -16.29185 |
| 245 | 245 | 1 | 0 | 3.5093  | 14.0372  | -14.5372  |
| 246 | 246 | 1 | 0 | 5.26395 | 15.79185 | -12.78255 |
| 247 | 247 | 1 | 0 | 3.5093  | 14.0372  | -11.0279  |
| 248 | 248 | 1 | 0 | 5.26395 | 15.79185 | -9.27325  |
| 249 | 249 | 1 | 0 | 3.5093  | 14.0372  | -7.5186   |
| 250 | 250 | 1 | 0 | 5.26395 | 15.79185 | -5.76395  |
| 251 | 251 | 1 | 0 | 3.5093  | 14.0372  | -4.0093   |
| 252 | 252 | 1 | 0 | 5.26395 | 15.79185 | -2.25465  |
| 253 | 253 | 1 | 0 | 3.5093  | 17.5465  | -32.0837  |
| 254 | 254 | 1 | 0 | 5.26395 | 19.30115 | -30.32905 |
| 255 | 255 | 1 | 0 | 3.5093  | 17.5465  | -28.5744  |
| 256 | 256 | 1 | 0 | 5.26395 | 19.30115 | -26.81975 |

|     |     |   |   |         |          |           |
|-----|-----|---|---|---------|----------|-----------|
| 257 | 257 | 1 | 0 | 3.5093  | 17.5465  | -25.0651  |
| 258 | 258 | 1 | 0 | 5.26395 | 19.30115 | -23.31045 |
| 259 | 259 | 1 | 0 | 3.5093  | 17.5465  | -21.5558  |
| 260 | 260 | 1 | 0 | 5.26395 | 19.30115 | -19.80115 |
| 261 | 261 | 1 | 0 | 3.5093  | 17.5465  | -18.0465  |
| 262 | 262 | 1 | 0 | 5.26395 | 19.30115 | -16.29185 |
| 263 | 263 | 1 | 0 | 3.5093  | 17.5465  | -14.5372  |
| 264 | 264 | 1 | 0 | 5.26395 | 19.30115 | -12.78255 |
| 265 | 265 | 1 | 0 | 3.5093  | 17.5465  | -11.0279  |
| 266 | 266 | 1 | 0 | 5.26395 | 19.30115 | -9.27325  |
| 267 | 267 | 1 | 0 | 3.5093  | 17.5465  | -7.5186   |
| 268 | 268 | 1 | 0 | 5.26395 | 19.30115 | -5.76395  |
| 269 | 269 | 1 | 0 | 3.5093  | 17.5465  | -4.0093   |
| 270 | 270 | 1 | 0 | 5.26395 | 19.30115 | -2.25465  |
| 271 | 271 | 1 | 0 | 3.5093  | 21.0558  | -32.0837  |
| 272 | 272 | 1 | 0 | 5.26395 | 22.81045 | -30.32905 |
| 273 | 273 | 1 | 0 | 3.5093  | 21.0558  | -28.5744  |
| 274 | 274 | 1 | 0 | 5.26395 | 22.81045 | -26.81975 |
| 275 | 275 | 1 | 0 | 3.5093  | 21.0558  | -25.0651  |
| 276 | 276 | 1 | 0 | 5.26395 | 22.81045 | -23.31045 |
| 277 | 277 | 1 | 0 | 3.5093  | 21.0558  | -21.5558  |
| 278 | 278 | 1 | 0 | 5.26395 | 22.81045 | -19.80115 |
| 279 | 279 | 1 | 0 | 3.5093  | 21.0558  | -18.0465  |
| 280 | 280 | 1 | 0 | 5.26395 | 22.81045 | -16.29185 |
| 281 | 281 | 1 | 0 | 3.5093  | 21.0558  | -14.5372  |
| 282 | 282 | 1 | 0 | 5.26395 | 22.81045 | -12.78255 |
| 283 | 283 | 1 | 0 | 3.5093  | 21.0558  | -11.0279  |
| 284 | 284 | 1 | 0 | 5.26395 | 22.81045 | -9.27325  |
| 285 | 285 | 1 | 0 | 3.5093  | 21.0558  | -7.5186   |
| 286 | 286 | 1 | 0 | 5.26395 | 22.81045 | -5.76395  |
| 287 | 287 | 1 | 0 | 3.5093  | 21.0558  | -4.0093   |
| 288 | 288 | 1 | 0 | 5.26395 | 22.81045 | -2.25465  |
| 289 | 289 | 1 | 0 | 3.5093  | 24.5651  | -32.0837  |
| 290 | 290 | 1 | 0 | 5.26395 | 26.31975 | -30.32905 |
| 291 | 291 | 1 | 0 | 3.5093  | 24.5651  | -28.5744  |
| 292 | 292 | 1 | 0 | 5.26395 | 26.31975 | -26.81975 |
| 293 | 293 | 1 | 0 | 3.5093  | 24.5651  | -25.0651  |
| 294 | 294 | 1 | 0 | 5.26395 | 26.31975 | -23.31045 |
| 295 | 295 | 1 | 0 | 3.5093  | 24.5651  | -21.5558  |
| 296 | 296 | 1 | 0 | 5.26395 | 26.31975 | -19.80115 |
| 297 | 297 | 1 | 0 | 3.5093  | 24.5651  | -18.0465  |
| 298 | 298 | 1 | 0 | 5.26395 | 26.31975 | -16.29185 |
| 299 | 299 | 1 | 0 | 3.5093  | 24.5651  | -14.5372  |
| 300 | 300 | 1 | 0 | 5.26395 | 26.31975 | -12.78255 |
| 301 | 301 | 1 | 0 | 3.5093  | 24.5651  | -11.0279  |
| 302 | 302 | 1 | 0 | 5.26395 | 26.31975 | -9.27325  |
| 303 | 303 | 1 | 0 | 3.5093  | 24.5651  | -7.5186   |
| 304 | 304 | 1 | 0 | 5.26395 | 26.31975 | -5.76395  |
| 305 | 305 | 1 | 0 | 3.5093  | 24.5651  | -4.0093   |
| 306 | 306 | 1 | 0 | 5.26395 | 26.31975 | -2.25465  |
| 307 | 307 | 1 | 0 | 3.5093  | 28.0744  | -32.0837  |

|     |     |   |   |         |          |           |
|-----|-----|---|---|---------|----------|-----------|
| 308 | 308 | 1 | 0 | 5.26395 | 29.82905 | -30.32905 |
| 309 | 309 | 1 | 0 | 3.5093  | 28.0744  | -28.5744  |
| 310 | 310 | 1 | 0 | 5.26395 | 29.82905 | -26.81975 |
| 311 | 311 | 1 | 0 | 3.5093  | 28.0744  | -25.0651  |
| 312 | 312 | 1 | 0 | 5.26395 | 29.82905 | -23.31045 |
| 313 | 313 | 1 | 0 | 3.5093  | 28.0744  | -21.5558  |
| 314 | 314 | 1 | 0 | 5.26395 | 29.82905 | -19.80115 |
| 315 | 315 | 1 | 0 | 3.5093  | 28.0744  | -18.0465  |
| 316 | 316 | 1 | 0 | 5.26395 | 29.82905 | -16.29185 |
| 317 | 317 | 1 | 0 | 3.5093  | 28.0744  | -14.5372  |
| 318 | 318 | 1 | 0 | 5.26395 | 29.82905 | -12.78255 |
| 319 | 319 | 1 | 0 | 3.5093  | 28.0744  | -11.0279  |
| 320 | 320 | 1 | 0 | 5.26395 | 29.82905 | -9.27325  |
| 321 | 321 | 1 | 0 | 3.5093  | 28.0744  | -7.5186   |
| 322 | 322 | 1 | 0 | 5.26395 | 29.82905 | -5.76395  |
| 323 | 323 | 1 | 0 | 3.5093  | 28.0744  | -4.0093   |
| 324 | 324 | 1 | 0 | 5.26395 | 29.82905 | -2.25465  |
| 325 | 325 | 1 | 0 | 7.0186  | 0        | -32.0837  |
| 326 | 326 | 1 | 0 | 8.77325 | 1.75465  | -30.32905 |
| 327 | 327 | 1 | 0 | 7.0186  | 0        | -28.5744  |
| 328 | 328 | 1 | 0 | 8.77325 | 1.75465  | -26.81975 |
| 329 | 329 | 1 | 0 | 7.0186  | 0        | -25.0651  |
| 330 | 330 | 1 | 0 | 8.77325 | 1.75465  | -23.31045 |
| 331 | 331 | 1 | 0 | 7.0186  | 0        | -21.5558  |
| 332 | 332 | 1 | 0 | 8.77325 | 1.75465  | -19.80115 |
| 333 | 333 | 1 | 0 | 7.0186  | 0        | -18.0465  |
| 334 | 334 | 1 | 0 | 8.77325 | 1.75465  | -16.29185 |
| 335 | 335 | 1 | 0 | 7.0186  | 0        | -14.5372  |
| 336 | 336 | 1 | 0 | 8.77325 | 1.75465  | -12.78255 |
| 337 | 337 | 1 | 0 | 7.0186  | 0        | -11.0279  |
| 338 | 338 | 1 | 0 | 8.77325 | 1.75465  | -9.27325  |
| 339 | 339 | 1 | 0 | 7.0186  | 0        | -7.5186   |
| 340 | 340 | 1 | 0 | 8.77325 | 1.75465  | -5.76395  |
| 341 | 341 | 1 | 0 | 7.0186  | 0        | -4.0093   |
| 342 | 342 | 1 | 0 | 8.77325 | 1.75465  | -2.25465  |
| 343 | 343 | 1 | 0 | 7.0186  | 3.5093   | -32.0837  |
| 344 | 344 | 1 | 0 | 8.77325 | 5.26395  | -30.32905 |
| 345 | 345 | 1 | 0 | 7.0186  | 3.5093   | -28.5744  |
| 346 | 346 | 1 | 0 | 8.77325 | 5.26395  | -26.81975 |
| 347 | 347 | 1 | 0 | 7.0186  | 3.5093   | -25.0651  |
| 348 | 348 | 1 | 0 | 8.77325 | 5.26395  | -23.31045 |
| 349 | 349 | 1 | 0 | 7.0186  | 3.5093   | -21.5558  |
| 350 | 350 | 1 | 0 | 8.77325 | 5.26395  | -19.80115 |
| 351 | 351 | 1 | 0 | 7.0186  | 3.5093   | -18.0465  |
| 352 | 352 | 1 | 0 | 8.77325 | 5.26395  | -16.29185 |
| 353 | 353 | 1 | 0 | 7.0186  | 3.5093   | -14.5372  |
| 354 | 354 | 1 | 0 | 8.77325 | 5.26395  | -12.78255 |
| 355 | 355 | 1 | 0 | 7.0186  | 3.5093   | -11.0279  |
| 356 | 356 | 1 | 0 | 8.77325 | 5.26395  | -9.27325  |
| 357 | 357 | 1 | 0 | 7.0186  | 3.5093   | -7.5186   |
| 358 | 358 | 1 | 0 | 8.77325 | 5.26395  | -5.76395  |



|     |     |   |   |         |          |           |
|-----|-----|---|---|---------|----------|-----------|
| 359 | 359 | 1 | 0 | 7.0186  | 3.5093   | -4.0093   |
| 360 | 360 | 1 | 0 | 8.77325 | 5.26395  | -2.25465  |
| 361 | 361 | 1 | 0 | 7.0186  | 7.0186   | -32.0837  |
| 362 | 362 | 1 | 0 | 8.77325 | 8.77325  | -30.32905 |
| 363 | 363 | 1 | 0 | 7.0186  | 7.0186   | -28.5744  |
| 364 | 364 | 1 | 0 | 8.77325 | 8.77325  | -26.81975 |
| 365 | 365 | 1 | 0 | 7.0186  | 7.0186   | -25.0651  |
| 366 | 366 | 1 | 0 | 8.77325 | 8.77325  | -23.31045 |
| 367 | 367 | 1 | 0 | 7.0186  | 7.0186   | -21.5558  |
| 368 | 368 | 1 | 0 | 8.77325 | 8.77325  | -19.80115 |
| 369 | 369 | 1 | 0 | 7.0186  | 7.0186   | -18.0465  |
| 370 | 370 | 1 | 0 | 8.77325 | 8.77325  | -16.29185 |
| 371 | 371 | 1 | 0 | 7.0186  | 7.0186   | -14.5372  |
| 372 | 372 | 1 | 0 | 8.77325 | 8.77325  | -12.78255 |
| 373 | 373 | 1 | 0 | 7.0186  | 7.0186   | -11.0279  |
| 374 | 374 | 1 | 0 | 8.77325 | 8.77325  | -9.27325  |
| 375 | 375 | 1 | 0 | 7.0186  | 7.0186   | -7.5186   |
| 376 | 376 | 1 | 0 | 8.77325 | 8.77325  | -5.76395  |
| 377 | 377 | 1 | 0 | 7.0186  | 7.0186   | -4.0093   |
| 378 | 378 | 1 | 0 | 8.77325 | 8.77325  | -2.25465  |
| 379 | 379 | 1 | 0 | 7.0186  | 10.5279  | -32.0837  |
| 380 | 380 | 1 | 0 | 8.77325 | 12.28255 | -30.32905 |
| 381 | 381 | 1 | 0 | 7.0186  | 10.5279  | -28.5744  |
| 382 | 382 | 1 | 0 | 8.77325 | 12.28255 | -26.81975 |
| 383 | 383 | 1 | 0 | 7.0186  | 10.5279  | -25.0651  |
| 384 | 384 | 1 | 0 | 8.77325 | 12.28255 | -23.31045 |
| 385 | 385 | 1 | 0 | 7.0186  | 10.5279  | -21.5558  |
| 386 | 386 | 1 | 0 | 8.77325 | 12.28255 | -19.80115 |
| 387 | 387 | 1 | 0 | 7.0186  | 10.5279  | -18.0465  |
| 388 | 388 | 1 | 0 | 8.77325 | 12.28255 | -16.29185 |
| 389 | 389 | 1 | 0 | 7.0186  | 10.5279  | -14.5372  |
| 390 | 390 | 1 | 0 | 8.77325 | 12.28255 | -12.78255 |
| 391 | 391 | 1 | 0 | 7.0186  | 10.5279  | -11.0279  |
| 392 | 392 | 1 | 0 | 8.77325 | 12.28255 | -9.27325  |
| 393 | 393 | 1 | 0 | 7.0186  | 10.5279  | -7.5186   |
| 394 | 394 | 1 | 0 | 8.77325 | 12.28255 | -5.76395  |
| 395 | 395 | 1 | 0 | 7.0186  | 10.5279  | -4.0093   |
| 396 | 396 | 1 | 0 | 8.77325 | 12.28255 | -2.25465  |
| 397 | 397 | 1 | 0 | 7.0186  | 14.0372  | -32.0837  |
| 398 | 398 | 1 | 0 | 8.77325 | 15.79185 | -30.32905 |
| 399 | 399 | 1 | 0 | 7.0186  | 14.0372  | -28.5744  |
| 400 | 400 | 1 | 0 | 8.77325 | 15.79185 | -26.81975 |
| 401 | 401 | 1 | 0 | 7.0186  | 14.0372  | -25.0651  |
| 402 | 402 | 1 | 0 | 8.77325 | 15.79185 | -23.31045 |
| 403 | 403 | 1 | 0 | 7.0186  | 14.0372  | -21.5558  |
| 404 | 404 | 1 | 0 | 8.77325 | 15.79185 | -19.80115 |
| 405 | 405 | 1 | 0 | 7.0186  | 14.0372  | -18.0465  |
| 406 | 406 | 1 | 0 | 8.77325 | 15.79185 | -16.29185 |
| 407 | 407 | 1 | 0 | 7.0186  | 14.0372  | -14.5372  |
| 408 | 408 | 1 | 0 | 8.77325 | 15.79185 | -12.78255 |
| 409 | 409 | 1 | 0 | 7.0186  | 14.0372  | -11.0279  |

|     |     |   |   |         |          |           |
|-----|-----|---|---|---------|----------|-----------|
| 410 | 410 | 1 | 0 | 8.77325 | 15.79185 | -9.27325  |
| 411 | 411 | 1 | 0 | 7.0186  | 14.0372  | -7.5186   |
| 412 | 412 | 1 | 0 | 8.77325 | 15.79185 | -5.76395  |
| 413 | 413 | 1 | 0 | 7.0186  | 14.0372  | -4.0093   |
| 414 | 414 | 1 | 0 | 8.77325 | 15.79185 | -2.25465  |
| 415 | 415 | 1 | 0 | 7.0186  | 17.5465  | -32.0837  |
| 416 | 416 | 1 | 0 | 8.77325 | 19.30115 | -30.32905 |
| 417 | 417 | 1 | 0 | 7.0186  | 17.5465  | -28.5744  |
| 418 | 418 | 1 | 0 | 8.77325 | 19.30115 | -26.81975 |
| 419 | 419 | 1 | 0 | 7.0186  | 17.5465  | -25.0651  |
| 420 | 420 | 1 | 0 | 8.77325 | 19.30115 | -23.31045 |
| 421 | 421 | 1 | 0 | 7.0186  | 17.5465  | -21.5558  |
| 422 | 422 | 1 | 0 | 8.77325 | 19.30115 | -19.80115 |
| 423 | 423 | 1 | 0 | 7.0186  | 17.5465  | -18.0465  |
| 424 | 424 | 1 | 0 | 8.77325 | 19.30115 | -16.29185 |
| 425 | 425 | 1 | 0 | 7.0186  | 17.5465  | -14.5372  |
| 426 | 426 | 1 | 0 | 8.77325 | 19.30115 | -12.78255 |
| 427 | 427 | 1 | 0 | 7.0186  | 17.5465  | -11.0279  |
| 428 | 428 | 1 | 0 | 8.77325 | 19.30115 | -9.27325  |
| 429 | 429 | 1 | 0 | 7.0186  | 17.5465  | -7.5186   |
| 430 | 430 | 1 | 0 | 8.77325 | 19.30115 | -5.76395  |
| 431 | 431 | 1 | 0 | 7.0186  | 17.5465  | -4.0093   |
| 432 | 432 | 1 | 0 | 8.77325 | 19.30115 | -2.25465  |
| 433 | 433 | 1 | 0 | 7.0186  | 21.0558  | -32.0837  |
| 434 | 434 | 1 | 0 | 8.77325 | 22.81045 | -30.32905 |
| 435 | 435 | 1 | 0 | 7.0186  | 21.0558  | -28.5744  |
| 436 | 436 | 1 | 0 | 8.77325 | 22.81045 | -26.81975 |
| 437 | 437 | 1 | 0 | 7.0186  | 21.0558  | -25.0651  |
| 438 | 438 | 1 | 0 | 8.77325 | 22.81045 | -23.31045 |
| 439 | 439 | 1 | 0 | 7.0186  | 21.0558  | -21.5558  |
| 440 | 440 | 1 | 0 | 8.77325 | 22.81045 | -19.80115 |
| 441 | 441 | 1 | 0 | 7.0186  | 21.0558  | -18.0465  |
| 442 | 442 | 1 | 0 | 8.77325 | 22.81045 | -16.29185 |
| 443 | 443 | 1 | 0 | 7.0186  | 21.0558  | -14.5372  |
| 444 | 444 | 1 | 0 | 8.77325 | 22.81045 | -12.78255 |
| 445 | 445 | 1 | 0 | 7.0186  | 21.0558  | -11.0279  |
| 446 | 446 | 1 | 0 | 8.77325 | 22.81045 | -9.27325  |
| 447 | 447 | 1 | 0 | 7.0186  | 21.0558  | -7.5186   |
| 448 | 448 | 1 | 0 | 8.77325 | 22.81045 | -5.76395  |
| 449 | 449 | 1 | 0 | 7.0186  | 21.0558  | -4.0093   |
| 450 | 450 | 1 | 0 | 8.77325 | 22.81045 | -2.25465  |
| 451 | 451 | 1 | 0 | 7.0186  | 24.5651  | -32.0837  |
| 452 | 452 | 1 | 0 | 8.77325 | 26.31975 | -30.32905 |
| 453 | 453 | 1 | 0 | 7.0186  | 24.5651  | -28.5744  |
| 454 | 454 | 1 | 0 | 8.77325 | 26.31975 | -26.81975 |
| 455 | 455 | 1 | 0 | 7.0186  | 24.5651  | -25.0651  |
| 456 | 456 | 1 | 0 | 8.77325 | 26.31975 | -23.31045 |
| 457 | 457 | 1 | 0 | 7.0186  | 24.5651  | -21.5558  |
| 458 | 458 | 1 | 0 | 8.77325 | 26.31975 | -19.80115 |
| 459 | 459 | 1 | 0 | 7.0186  | 24.5651  | -18.0465  |
| 460 | 460 | 1 | 0 | 8.77325 | 26.31975 | -16.29185 |

|     |     |   |   |          |          |           |
|-----|-----|---|---|----------|----------|-----------|
| 461 | 461 | 1 | 0 | 7.0186   | 24.5651  | -14.5372  |
| 462 | 462 | 1 | 0 | 8.77325  | 26.31975 | -12.78255 |
| 463 | 463 | 1 | 0 | 7.0186   | 24.5651  | -11.0279  |
| 464 | 464 | 1 | 0 | 8.77325  | 26.31975 | -9.27325  |
| 465 | 465 | 1 | 0 | 7.0186   | 24.5651  | -7.5186   |
| 466 | 466 | 1 | 0 | 8.77325  | 26.31975 | -5.76395  |
| 467 | 467 | 1 | 0 | 7.0186   | 24.5651  | -4.0093   |
| 468 | 468 | 1 | 0 | 8.77325  | 26.31975 | -2.25465  |
| 469 | 469 | 1 | 0 | 7.0186   | 28.0744  | -32.0837  |
| 470 | 470 | 1 | 0 | 8.77325  | 29.82905 | -30.32905 |
| 471 | 471 | 1 | 0 | 7.0186   | 28.0744  | -28.5744  |
| 472 | 472 | 1 | 0 | 8.77325  | 29.82905 | -26.81975 |
| 473 | 473 | 1 | 0 | 7.0186   | 28.0744  | -25.0651  |
| 474 | 474 | 1 | 0 | 8.77325  | 29.82905 | -23.31045 |
| 475 | 475 | 1 | 0 | 7.0186   | 28.0744  | -21.5558  |
| 476 | 476 | 1 | 0 | 8.77325  | 29.82905 | -19.80115 |
| 477 | 477 | 1 | 0 | 7.0186   | 28.0744  | -18.0465  |
| 478 | 478 | 1 | 0 | 8.77325  | 29.82905 | -16.29185 |
| 479 | 479 | 1 | 0 | 7.0186   | 28.0744  | -14.5372  |
| 480 | 480 | 1 | 0 | 8.77325  | 29.82905 | -12.78255 |
| 481 | 481 | 1 | 0 | 7.0186   | 28.0744  | -11.0279  |
| 482 | 482 | 1 | 0 | 8.77325  | 29.82905 | -9.27325  |
| 483 | 483 | 1 | 0 | 7.0186   | 28.0744  | -7.5186   |
| 484 | 484 | 1 | 0 | 8.77325  | 29.82905 | -5.76395  |
| 485 | 485 | 1 | 0 | 7.0186   | 28.0744  | -4.0093   |
| 486 | 486 | 1 | 0 | 8.77325  | 29.82905 | -2.25465  |
| 487 | 487 | 1 | 0 | 10.5279  | 0        | -32.0837  |
| 488 | 488 | 1 | 0 | 12.28255 | 1.75465  | -30.32905 |
| 489 | 489 | 1 | 0 | 10.5279  | 0        | -28.5744  |
| 490 | 490 | 1 | 0 | 12.28255 | 1.75465  | -26.81975 |
| 491 | 491 | 1 | 0 | 10.5279  | 0        | -25.0651  |
| 492 | 492 | 1 | 0 | 12.28255 | 1.75465  | -23.31045 |
| 493 | 493 | 1 | 0 | 10.5279  | 0        | -21.5558  |
| 494 | 494 | 1 | 0 | 12.28255 | 1.75465  | -19.80115 |
| 495 | 495 | 1 | 0 | 10.5279  | 0        | -18.0465  |
| 496 | 496 | 1 | 0 | 12.28255 | 1.75465  | -16.29185 |
| 497 | 497 | 1 | 0 | 10.5279  | 0        | -14.5372  |
| 498 | 498 | 1 | 0 | 12.28255 | 1.75465  | -12.78255 |
| 499 | 499 | 1 | 0 | 10.5279  | 0        | -11.0279  |
| 500 | 500 | 1 | 0 | 12.28255 | 1.75465  | -9.27325  |
| 501 | 501 | 1 | 0 | 10.5279  | 0        | -7.5186   |
| 502 | 502 | 1 | 0 | 12.28255 | 1.75465  | -5.76395  |
| 503 | 503 | 1 | 0 | 10.5279  | 0        | -4.0093   |
| 504 | 504 | 1 | 0 | 12.28255 | 1.75465  | -2.25465  |
| 505 | 505 | 1 | 0 | 10.5279  | 3.5093   | -32.0837  |
| 506 | 506 | 1 | 0 | 12.28255 | 5.26395  | -30.32905 |
| 507 | 507 | 1 | 0 | 10.5279  | 3.5093   | -28.5744  |
| 508 | 508 | 1 | 0 | 12.28255 | 5.26395  | -26.81975 |
| 509 | 509 | 1 | 0 | 10.5279  | 3.5093   | -25.0651  |
| 510 | 510 | 1 | 0 | 12.28255 | 5.26395  | -23.31045 |
| 511 | 511 | 1 | 0 | 10.5279  | 3.5093   | -21.5558  |

|     |     |   |   |          |          |           |
|-----|-----|---|---|----------|----------|-----------|
| 512 | 512 | 1 | 0 | 12.28255 | 5.26395  | -19.80115 |
| 513 | 513 | 1 | 0 | 10.5279  | 3.5093   | -18.0465  |
| 514 | 514 | 1 | 0 | 12.28255 | 5.26395  | -16.29185 |
| 515 | 515 | 1 | 0 | 10.5279  | 3.5093   | -14.5372  |
| 516 | 516 | 1 | 0 | 12.28255 | 5.26395  | -12.78255 |
| 517 | 517 | 1 | 0 | 10.5279  | 3.5093   | -11.0279  |
| 518 | 518 | 1 | 0 | 12.28255 | 5.26395  | -9.27325  |
| 519 | 519 | 1 | 0 | 10.5279  | 3.5093   | -7.5186   |
| 520 | 520 | 1 | 0 | 12.28255 | 5.26395  | -5.76395  |
| 521 | 521 | 1 | 0 | 10.5279  | 3.5093   | -4.0093   |
| 522 | 522 | 1 | 0 | 12.28255 | 5.26395  | -2.25465  |
| 523 | 523 | 1 | 0 | 10.5279  | 7.0186   | -32.0837  |
| 524 | 524 | 1 | 0 | 12.28255 | 8.77325  | -30.32905 |
| 525 | 525 | 1 | 0 | 10.5279  | 7.0186   | -28.5744  |
| 526 | 526 | 1 | 0 | 12.28255 | 8.77325  | -26.81975 |
| 527 | 527 | 1 | 0 | 10.5279  | 7.0186   | -25.0651  |
| 528 | 528 | 1 | 0 | 12.28255 | 8.77325  | -23.31045 |
| 529 | 529 | 1 | 0 | 10.5279  | 7.0186   | -21.5558  |
| 530 | 530 | 1 | 0 | 12.28255 | 8.77325  | -19.80115 |
| 531 | 531 | 1 | 0 | 10.5279  | 7.0186   | -18.0465  |
| 532 | 532 | 1 | 0 | 12.28255 | 8.77325  | -16.29185 |
| 533 | 533 | 1 | 0 | 10.5279  | 7.0186   | -14.5372  |
| 534 | 534 | 1 | 0 | 12.28255 | 8.77325  | -12.78255 |
| 535 | 535 | 1 | 0 | 10.5279  | 7.0186   | -11.0279  |
| 536 | 536 | 1 | 0 | 12.28255 | 8.77325  | -9.27325  |
| 537 | 537 | 1 | 0 | 10.5279  | 7.0186   | -7.5186   |
| 538 | 538 | 1 | 0 | 12.28255 | 8.77325  | -5.76395  |
| 539 | 539 | 1 | 0 | 10.5279  | 7.0186   | -4.0093   |
| 540 | 540 | 1 | 0 | 12.28255 | 8.77325  | -2.25465  |
| 541 | 541 | 1 | 0 | 10.5279  | 10.5279  | -32.0837  |
| 542 | 542 | 1 | 0 | 12.28255 | 12.28255 | -30.32905 |
| 543 | 543 | 1 | 0 | 10.5279  | 10.5279  | -28.5744  |
| 544 | 544 | 1 | 0 | 12.28255 | 12.28255 | -26.81975 |
| 545 | 545 | 1 | 0 | 10.5279  | 10.5279  | -25.0651  |
| 546 | 546 | 1 | 0 | 12.28255 | 12.28255 | -23.31045 |
| 547 | 547 | 1 | 0 | 10.5279  | 10.5279  | -21.5558  |
| 548 | 548 | 1 | 0 | 12.28255 | 12.28255 | -19.80115 |
| 549 | 549 | 1 | 0 | 10.5279  | 10.5279  | -18.0465  |
| 550 | 550 | 1 | 0 | 12.28255 | 12.28255 | -16.29185 |
| 551 | 551 | 1 | 0 | 10.5279  | 10.5279  | -14.5372  |
| 552 | 552 | 1 | 0 | 12.28255 | 12.28255 | -12.78255 |
| 553 | 553 | 1 | 0 | 10.5279  | 10.5279  | -11.0279  |
| 554 | 554 | 1 | 0 | 12.28255 | 12.28255 | -9.27325  |
| 555 | 555 | 1 | 0 | 10.5279  | 10.5279  | -7.5186   |
| 556 | 556 | 1 | 0 | 12.28255 | 12.28255 | -5.76395  |
| 557 | 557 | 1 | 0 | 10.5279  | 10.5279  | -4.0093   |
| 558 | 558 | 1 | 0 | 12.28255 | 12.28255 | -2.25465  |
| 559 | 559 | 1 | 0 | 10.5279  | 14.0372  | -32.0837  |
| 560 | 560 | 1 | 0 | 12.28255 | 15.79185 | -30.32905 |
| 561 | 561 | 1 | 0 | 10.5279  | 14.0372  | -28.5744  |
| 562 | 562 | 1 | 0 | 12.28255 | 15.79185 | -26.81975 |

|     |     |   |   |          |          |           |
|-----|-----|---|---|----------|----------|-----------|
| 563 | 563 | 1 | 0 | 10.5279  | 14.0372  | -25.0651  |
| 564 | 564 | 1 | 0 | 12.28255 | 15.79185 | -23.31045 |
| 565 | 565 | 1 | 0 | 10.5279  | 14.0372  | -21.5558  |
| 566 | 566 | 1 | 0 | 12.28255 | 15.79185 | -19.80115 |
| 567 | 567 | 1 | 0 | 10.5279  | 14.0372  | -18.0465  |
| 568 | 568 | 1 | 0 | 12.28255 | 15.79185 | -16.29185 |
| 569 | 569 | 1 | 0 | 10.5279  | 14.0372  | -14.5372  |
| 570 | 570 | 1 | 0 | 12.28255 | 15.79185 | -12.78255 |
| 571 | 571 | 1 | 0 | 10.5279  | 14.0372  | -11.0279  |
| 572 | 572 | 1 | 0 | 12.28255 | 15.79185 | -9.27325  |
| 573 | 573 | 1 | 0 | 10.5279  | 14.0372  | -7.5186   |
| 574 | 574 | 1 | 0 | 12.28255 | 15.79185 | -5.76395  |
| 575 | 575 | 1 | 0 | 10.5279  | 14.0372  | -4.0093   |
| 576 | 576 | 1 | 0 | 12.28255 | 15.79185 | -2.25465  |
| 577 | 577 | 1 | 0 | 10.5279  | 17.5465  | -32.0837  |
| 578 | 578 | 1 | 0 | 12.28255 | 19.30115 | -30.32905 |
| 579 | 579 | 1 | 0 | 10.5279  | 17.5465  | -28.5744  |
| 580 | 580 | 1 | 0 | 12.28255 | 19.30115 | -26.81975 |
| 581 | 581 | 1 | 0 | 10.5279  | 17.5465  | -25.0651  |
| 582 | 582 | 1 | 0 | 12.28255 | 19.30115 | -23.31045 |
| 583 | 583 | 1 | 0 | 10.5279  | 17.5465  | -21.5558  |
| 584 | 584 | 1 | 0 | 12.28255 | 19.30115 | -19.80115 |
| 585 | 585 | 1 | 0 | 10.5279  | 17.5465  | -18.0465  |
| 586 | 586 | 1 | 0 | 12.28255 | 19.30115 | -16.29185 |
| 587 | 587 | 1 | 0 | 10.5279  | 17.5465  | -14.5372  |
| 588 | 588 | 1 | 0 | 12.28255 | 19.30115 | -12.78255 |
| 589 | 589 | 1 | 0 | 10.5279  | 17.5465  | -11.0279  |
| 590 | 590 | 1 | 0 | 12.28255 | 19.30115 | -9.27325  |
| 591 | 591 | 1 | 0 | 10.5279  | 17.5465  | -7.5186   |
| 592 | 592 | 1 | 0 | 12.28255 | 19.30115 | -5.76395  |
| 593 | 593 | 1 | 0 | 10.5279  | 17.5465  | -4.0093   |
| 594 | 594 | 1 | 0 | 12.28255 | 19.30115 | -2.25465  |
| 595 | 595 | 1 | 0 | 10.5279  | 21.0558  | -32.0837  |
| 596 | 596 | 1 | 0 | 12.28255 | 22.81045 | -30.32905 |
| 597 | 597 | 1 | 0 | 10.5279  | 21.0558  | -28.5744  |
| 598 | 598 | 1 | 0 | 12.28255 | 22.81045 | -26.81975 |
| 599 | 599 | 1 | 0 | 10.5279  | 21.0558  | -25.0651  |
| 600 | 600 | 1 | 0 | 12.28255 | 22.81045 | -23.31045 |
| 601 | 601 | 1 | 0 | 10.5279  | 21.0558  | -21.5558  |
| 602 | 602 | 1 | 0 | 12.28255 | 22.81045 | -19.80115 |
| 603 | 603 | 1 | 0 | 10.5279  | 21.0558  | -18.0465  |
| 604 | 604 | 1 | 0 | 12.28255 | 22.81045 | -16.29185 |
| 605 | 605 | 1 | 0 | 10.5279  | 21.0558  | -14.5372  |
| 606 | 606 | 1 | 0 | 12.28255 | 22.81045 | -12.78255 |
| 607 | 607 | 1 | 0 | 10.5279  | 21.0558  | -11.0279  |
| 608 | 608 | 1 | 0 | 12.28255 | 22.81045 | -9.27325  |
| 609 | 609 | 1 | 0 | 10.5279  | 21.0558  | -7.5186   |
| 610 | 610 | 1 | 0 | 12.28255 | 22.81045 | -5.76395  |
| 611 | 611 | 1 | 0 | 10.5279  | 21.0558  | -4.0093   |
| 612 | 612 | 1 | 0 | 12.28255 | 22.81045 | -2.25465  |
| 613 | 613 | 1 | 0 | 10.5279  | 24.5651  | -32.0837  |

|     |     |   |   |          |          |           |
|-----|-----|---|---|----------|----------|-----------|
| 614 | 614 | 1 | 0 | 12.28255 | 26.31975 | -30.32905 |
| 615 | 615 | 1 | 0 | 10.5279  | 24.5651  | -28.5744  |
| 616 | 616 | 1 | 0 | 12.28255 | 26.31975 | -26.81975 |
| 617 | 617 | 1 | 0 | 10.5279  | 24.5651  | -25.0651  |
| 618 | 618 | 1 | 0 | 12.28255 | 26.31975 | -23.31045 |
| 619 | 619 | 1 | 0 | 10.5279  | 24.5651  | -21.5558  |
| 620 | 620 | 1 | 0 | 12.28255 | 26.31975 | -19.80115 |
| 621 | 621 | 1 | 0 | 10.5279  | 24.5651  | -18.0465  |
| 622 | 622 | 1 | 0 | 12.28255 | 26.31975 | -16.29185 |
| 623 | 623 | 1 | 0 | 10.5279  | 24.5651  | -14.5372  |
| 624 | 624 | 1 | 0 | 12.28255 | 26.31975 | -12.78255 |
| 625 | 625 | 1 | 0 | 10.5279  | 24.5651  | -11.0279  |
| 626 | 626 | 1 | 0 | 12.28255 | 26.31975 | -9.27325  |
| 627 | 627 | 1 | 0 | 10.5279  | 24.5651  | -7.5186   |
| 628 | 628 | 1 | 0 | 12.28255 | 26.31975 | -5.76395  |
| 629 | 629 | 1 | 0 | 10.5279  | 24.5651  | -4.0093   |
| 630 | 630 | 1 | 0 | 12.28255 | 26.31975 | -2.25465  |
| 631 | 631 | 1 | 0 | 10.5279  | 28.0744  | -32.0837  |
| 632 | 632 | 1 | 0 | 12.28255 | 29.82905 | -30.32905 |
| 633 | 633 | 1 | 0 | 10.5279  | 28.0744  | -28.5744  |
| 634 | 634 | 1 | 0 | 12.28255 | 29.82905 | -26.81975 |
| 635 | 635 | 1 | 0 | 10.5279  | 28.0744  | -25.0651  |
| 636 | 636 | 1 | 0 | 12.28255 | 29.82905 | -23.31045 |
| 637 | 637 | 1 | 0 | 10.5279  | 28.0744  | -21.5558  |
| 638 | 638 | 1 | 0 | 12.28255 | 29.82905 | -19.80115 |
| 639 | 639 | 1 | 0 | 10.5279  | 28.0744  | -18.0465  |
| 640 | 640 | 1 | 0 | 12.28255 | 29.82905 | -16.29185 |
| 641 | 641 | 1 | 0 | 10.5279  | 28.0744  | -14.5372  |
| 642 | 642 | 1 | 0 | 12.28255 | 29.82905 | -12.78255 |
| 643 | 643 | 1 | 0 | 10.5279  | 28.0744  | -11.0279  |
| 644 | 644 | 1 | 0 | 12.28255 | 29.82905 | -9.27325  |
| 645 | 645 | 1 | 0 | 10.5279  | 28.0744  | -7.5186   |
| 646 | 646 | 1 | 0 | 12.28255 | 29.82905 | -5.76395  |
| 647 | 647 | 1 | 0 | 10.5279  | 28.0744  | -4.0093   |
| 648 | 648 | 1 | 0 | 12.28255 | 29.82905 | -2.25465  |
| 649 | 649 | 1 | 0 | 14.0372  | 0        | -32.0837  |
| 650 | 650 | 1 | 0 | 15.79185 | 1.75465  | -30.32905 |
| 651 | 651 | 1 | 0 | 14.0372  | 0        | -28.5744  |
| 652 | 652 | 1 | 0 | 15.79185 | 1.75465  | -26.81975 |
| 653 | 653 | 1 | 0 | 14.0372  | 0        | -25.0651  |
| 654 | 654 | 1 | 0 | 15.79185 | 1.75465  | -23.31045 |
| 655 | 655 | 1 | 0 | 14.0372  | 0        | -21.5558  |
| 656 | 656 | 1 | 0 | 15.79185 | 1.75465  | -19.80115 |
| 657 | 657 | 1 | 0 | 14.0372  | 0        | -18.0465  |
| 658 | 658 | 1 | 0 | 15.79185 | 1.75465  | -16.29185 |
| 659 | 659 | 1 | 0 | 14.0372  | 0        | -14.5372  |
| 660 | 660 | 1 | 0 | 15.79185 | 1.75465  | -12.78255 |
| 661 | 661 | 1 | 0 | 14.0372  | 0        | -11.0279  |
| 662 | 662 | 1 | 0 | 15.79185 | 1.75465  | -9.27325  |
| 663 | 663 | 1 | 0 | 14.0372  | 0        | -7.5186   |
| 664 | 664 | 1 | 0 | 15.79185 | 1.75465  | -5.76395  |

|     |     |   |   |          |          |           |
|-----|-----|---|---|----------|----------|-----------|
| 665 | 665 | 1 | 0 | 14.0372  | 0        | -4.0093   |
| 666 | 666 | 1 | 0 | 15.79185 | 1.75465  | -2.25465  |
| 667 | 667 | 1 | 0 | 14.0372  | 3.5093   | -32.0837  |
| 668 | 668 | 1 | 0 | 15.79185 | 5.26395  | -30.32905 |
| 669 | 669 | 1 | 0 | 14.0372  | 3.5093   | -28.5744  |
| 670 | 670 | 1 | 0 | 15.79185 | 5.26395  | -26.81975 |
| 671 | 671 | 1 | 0 | 14.0372  | 3.5093   | -25.0651  |
| 672 | 672 | 1 | 0 | 15.79185 | 5.26395  | -23.31045 |
| 673 | 673 | 1 | 0 | 14.0372  | 3.5093   | -21.5558  |
| 674 | 674 | 1 | 0 | 15.79185 | 5.26395  | -19.80115 |
| 675 | 675 | 1 | 0 | 14.0372  | 3.5093   | -18.0465  |
| 676 | 676 | 1 | 0 | 15.79185 | 5.26395  | -16.29185 |
| 677 | 677 | 1 | 0 | 14.0372  | 3.5093   | -14.5372  |
| 678 | 678 | 1 | 0 | 15.79185 | 5.26395  | -12.78255 |
| 679 | 679 | 1 | 0 | 14.0372  | 3.5093   | -11.0279  |
| 680 | 680 | 1 | 0 | 15.79185 | 5.26395  | -9.27325  |
| 681 | 681 | 1 | 0 | 14.0372  | 3.5093   | -7.5186   |
| 682 | 682 | 1 | 0 | 15.79185 | 5.26395  | -5.76395  |
| 683 | 683 | 1 | 0 | 14.0372  | 3.5093   | -4.0093   |
| 684 | 684 | 1 | 0 | 15.79185 | 5.26395  | -2.25465  |
| 685 | 685 | 1 | 0 | 14.0372  | 7.0186   | -32.0837  |
| 686 | 686 | 1 | 0 | 15.79185 | 8.77325  | -30.32905 |
| 687 | 687 | 1 | 0 | 14.0372  | 7.0186   | -28.5744  |
| 688 | 688 | 1 | 0 | 15.79185 | 8.77325  | -26.81975 |
| 689 | 689 | 1 | 0 | 14.0372  | 7.0186   | -25.0651  |
| 690 | 690 | 1 | 0 | 15.79185 | 8.77325  | -23.31045 |
| 691 | 691 | 1 | 0 | 14.0372  | 7.0186   | -21.5558  |
| 692 | 692 | 1 | 0 | 15.79185 | 8.77325  | -19.80115 |
| 693 | 693 | 1 | 0 | 14.0372  | 7.0186   | -18.0465  |
| 694 | 694 | 1 | 0 | 15.79185 | 8.77325  | -16.29185 |
| 695 | 695 | 1 | 0 | 14.0372  | 7.0186   | -14.5372  |
| 696 | 696 | 1 | 0 | 15.79185 | 8.77325  | -12.78255 |
| 697 | 697 | 1 | 0 | 14.0372  | 7.0186   | -11.0279  |
| 698 | 698 | 1 | 0 | 15.79185 | 8.77325  | -9.27325  |
| 699 | 699 | 1 | 0 | 14.0372  | 7.0186   | -7.5186   |
| 700 | 700 | 1 | 0 | 15.79185 | 8.77325  | -5.76395  |
| 701 | 701 | 1 | 0 | 14.0372  | 7.0186   | -4.0093   |
| 702 | 702 | 1 | 0 | 15.79185 | 8.77325  | -2.25465  |
| 703 | 703 | 1 | 0 | 14.0372  | 10.5279  | -32.0837  |
| 704 | 704 | 1 | 0 | 15.79185 | 12.28255 | -30.32905 |
| 705 | 705 | 1 | 0 | 14.0372  | 10.5279  | -28.5744  |
| 706 | 706 | 1 | 0 | 15.79185 | 12.28255 | -26.81975 |
| 707 | 707 | 1 | 0 | 14.0372  | 10.5279  | -25.0651  |
| 708 | 708 | 1 | 0 | 15.79185 | 12.28255 | -23.31045 |
| 709 | 709 | 1 | 0 | 14.0372  | 10.5279  | -21.5558  |
| 710 | 710 | 1 | 0 | 15.79185 | 12.28255 | -19.80115 |
| 711 | 711 | 1 | 0 | 14.0372  | 10.5279  | -18.0465  |
| 712 | 712 | 1 | 0 | 15.79185 | 12.28255 | -16.29185 |
| 713 | 713 | 1 | 0 | 14.0372  | 10.5279  | -14.5372  |
| 714 | 714 | 1 | 0 | 15.79185 | 12.28255 | -12.78255 |
| 715 | 715 | 1 | 0 | 14.0372  | 10.5279  | -11.0279  |

|     |     |   |   |          |          |           |
|-----|-----|---|---|----------|----------|-----------|
| 716 | 716 | 1 | 0 | 15.79185 | 12.28255 | -9.27325  |
| 717 | 717 | 1 | 0 | 14.0372  | 10.5279  | -7.5186   |
| 718 | 718 | 1 | 0 | 15.79185 | 12.28255 | -5.76395  |
| 719 | 719 | 1 | 0 | 14.0372  | 10.5279  | -4.0093   |
| 720 | 720 | 1 | 0 | 15.79185 | 12.28255 | -2.25465  |
| 721 | 721 | 1 | 0 | 14.0372  | 14.0372  | -32.0837  |
| 722 | 722 | 1 | 0 | 15.79185 | 15.79185 | -30.32905 |
| 723 | 723 | 1 | 0 | 14.0372  | 14.0372  | -28.5744  |
| 724 | 724 | 1 | 0 | 15.79185 | 15.79185 | -26.81975 |
| 725 | 725 | 1 | 0 | 14.0372  | 14.0372  | -25.0651  |
| 726 | 726 | 1 | 0 | 15.79185 | 15.79185 | -23.31045 |
| 727 | 727 | 1 | 0 | 14.0372  | 14.0372  | -21.5558  |
| 728 | 728 | 1 | 0 | 15.79185 | 15.79185 | -19.80115 |
| 729 | 729 | 1 | 0 | 14.0372  | 14.0372  | -18.0465  |
| 730 | 730 | 1 | 0 | 15.79185 | 15.79185 | -16.29185 |
| 731 | 731 | 1 | 0 | 14.0372  | 14.0372  | -14.5372  |
| 732 | 732 | 1 | 0 | 15.79185 | 15.79185 | -12.78255 |
| 733 | 733 | 1 | 0 | 14.0372  | 14.0372  | -11.0279  |
| 734 | 734 | 1 | 0 | 15.79185 | 15.79185 | -9.27325  |
| 735 | 735 | 1 | 0 | 14.0372  | 14.0372  | -7.5186   |
| 736 | 736 | 1 | 0 | 15.79185 | 15.79185 | -5.76395  |
| 737 | 737 | 1 | 0 | 14.0372  | 14.0372  | -4.0093   |
| 738 | 738 | 1 | 0 | 15.79185 | 15.79185 | -2.25465  |
| 739 | 739 | 1 | 0 | 14.0372  | 17.5465  | -32.0837  |
| 740 | 740 | 1 | 0 | 15.79185 | 19.30115 | -30.32905 |
| 741 | 741 | 1 | 0 | 14.0372  | 17.5465  | -28.5744  |
| 742 | 742 | 1 | 0 | 15.79185 | 19.30115 | -26.81975 |
| 743 | 743 | 1 | 0 | 14.0372  | 17.5465  | -25.0651  |
| 744 | 744 | 1 | 0 | 15.79185 | 19.30115 | -23.31045 |
| 745 | 745 | 1 | 0 | 14.0372  | 17.5465  | -21.5558  |
| 746 | 746 | 1 | 0 | 15.79185 | 19.30115 | -19.80115 |
| 747 | 747 | 1 | 0 | 14.0372  | 17.5465  | -18.0465  |
| 748 | 748 | 1 | 0 | 15.79185 | 19.30115 | -16.29185 |
| 749 | 749 | 1 | 0 | 14.0372  | 17.5465  | -14.5372  |
| 750 | 750 | 1 | 0 | 15.79185 | 19.30115 | -12.78255 |
| 751 | 751 | 1 | 0 | 14.0372  | 17.5465  | -11.0279  |
| 752 | 752 | 1 | 0 | 15.79185 | 19.30115 | -9.27325  |
| 753 | 753 | 1 | 0 | 14.0372  | 17.5465  | -7.5186   |
| 754 | 754 | 1 | 0 | 15.79185 | 19.30115 | -5.76395  |
| 755 | 755 | 1 | 0 | 14.0372  | 17.5465  | -4.0093   |
| 756 | 756 | 1 | 0 | 15.79185 | 19.30115 | -2.25465  |
| 757 | 757 | 1 | 0 | 14.0372  | 21.0558  | -32.0837  |
| 758 | 758 | 1 | 0 | 15.79185 | 22.81045 | -30.32905 |
| 759 | 759 | 1 | 0 | 14.0372  | 21.0558  | -28.5744  |
| 760 | 760 | 1 | 0 | 15.79185 | 22.81045 | -26.81975 |
| 761 | 761 | 1 | 0 | 14.0372  | 21.0558  | -25.0651  |
| 762 | 762 | 1 | 0 | 15.79185 | 22.81045 | -23.31045 |
| 763 | 763 | 1 | 0 | 14.0372  | 21.0558  | -21.5558  |
| 764 | 764 | 1 | 0 | 15.79185 | 22.81045 | -19.80115 |
| 765 | 765 | 1 | 0 | 14.0372  | 21.0558  | -18.0465  |
| 766 | 766 | 1 | 0 | 15.79185 | 22.81045 | -16.29185 |



|     |     |   |   |          |          |           |
|-----|-----|---|---|----------|----------|-----------|
| 767 | 767 | 1 | 0 | 14.0372  | 21.0558  | -14.5372  |
| 768 | 768 | 1 | 0 | 15.79185 | 22.81045 | -12.78255 |
| 769 | 769 | 1 | 0 | 14.0372  | 21.0558  | -11.0279  |
| 770 | 770 | 1 | 0 | 15.79185 | 22.81045 | -9.27325  |
| 771 | 771 | 1 | 0 | 14.0372  | 21.0558  | -7.5186   |
| 772 | 772 | 1 | 0 | 15.79185 | 22.81045 | -5.76395  |
| 773 | 773 | 1 | 0 | 14.0372  | 21.0558  | -4.0093   |
| 774 | 774 | 1 | 0 | 15.79185 | 22.81045 | -2.25465  |
| 775 | 775 | 1 | 0 | 14.0372  | 24.5651  | -32.0837  |
| 776 | 776 | 1 | 0 | 15.79185 | 26.31975 | -30.32905 |
| 777 | 777 | 1 | 0 | 14.0372  | 24.5651  | -28.5744  |
| 778 | 778 | 1 | 0 | 15.79185 | 26.31975 | -26.81975 |
| 779 | 779 | 1 | 0 | 14.0372  | 24.5651  | -25.0651  |
| 780 | 780 | 1 | 0 | 15.79185 | 26.31975 | -23.31045 |
| 781 | 781 | 1 | 0 | 14.0372  | 24.5651  | -21.5558  |
| 782 | 782 | 1 | 0 | 15.79185 | 26.31975 | -19.80115 |
| 783 | 783 | 1 | 0 | 14.0372  | 24.5651  | -18.0465  |
| 784 | 784 | 1 | 0 | 15.79185 | 26.31975 | -16.29185 |
| 785 | 785 | 1 | 0 | 14.0372  | 24.5651  | -14.5372  |
| 786 | 786 | 1 | 0 | 15.79185 | 26.31975 | -12.78255 |
| 787 | 787 | 1 | 0 | 14.0372  | 24.5651  | -11.0279  |
| 788 | 788 | 1 | 0 | 15.79185 | 26.31975 | -9.27325  |
| 789 | 789 | 1 | 0 | 14.0372  | 24.5651  | -7.5186   |
| 790 | 790 | 1 | 0 | 15.79185 | 26.31975 | -5.76395  |
| 791 | 791 | 1 | 0 | 14.0372  | 24.5651  | -4.0093   |
| 792 | 792 | 1 | 0 | 15.79185 | 26.31975 | -2.25465  |
| 793 | 793 | 1 | 0 | 14.0372  | 28.0744  | -32.0837  |
| 794 | 794 | 1 | 0 | 15.79185 | 29.82905 | -30.32905 |
| 795 | 795 | 1 | 0 | 14.0372  | 28.0744  | -28.5744  |
| 796 | 796 | 1 | 0 | 15.79185 | 29.82905 | -26.81975 |
| 797 | 797 | 1 | 0 | 14.0372  | 28.0744  | -25.0651  |
| 798 | 798 | 1 | 0 | 15.79185 | 29.82905 | -23.31045 |
| 799 | 799 | 1 | 0 | 14.0372  | 28.0744  | -21.5558  |
| 800 | 800 | 1 | 0 | 15.79185 | 29.82905 | -19.80115 |
| 801 | 801 | 1 | 0 | 14.0372  | 28.0744  | -18.0465  |
| 802 | 802 | 1 | 0 | 15.79185 | 29.82905 | -16.29185 |
| 803 | 803 | 1 | 0 | 14.0372  | 28.0744  | -14.5372  |
| 804 | 804 | 1 | 0 | 15.79185 | 29.82905 | -12.78255 |
| 805 | 805 | 1 | 0 | 14.0372  | 28.0744  | -11.0279  |
| 806 | 806 | 1 | 0 | 15.79185 | 29.82905 | -9.27325  |
| 807 | 807 | 1 | 0 | 14.0372  | 28.0744  | -7.5186   |
| 808 | 808 | 1 | 0 | 15.79185 | 29.82905 | -5.76395  |
| 809 | 809 | 1 | 0 | 14.0372  | 28.0744  | -4.0093   |
| 810 | 810 | 1 | 0 | 15.79185 | 29.82905 | -2.25465  |
| 811 | 811 | 1 | 0 | 17.5465  | 0        | -32.0837  |
| 812 | 812 | 1 | 0 | 19.30115 | 1.75465  | -30.32905 |
| 813 | 813 | 1 | 0 | 17.5465  | 0        | -28.5744  |
| 814 | 814 | 1 | 0 | 19.30115 | 1.75465  | -26.81975 |
| 815 | 815 | 1 | 0 | 17.5465  | 0        | -25.0651  |
| 816 | 816 | 1 | 0 | 19.30115 | 1.75465  | -23.31045 |
| 817 | 817 | 1 | 0 | 17.5465  | 0        | -21.5558  |

|     |     |   |   |          |          |           |
|-----|-----|---|---|----------|----------|-----------|
| 818 | 818 | 1 | 0 | 19.30115 | 1.75465  | -19.80115 |
| 819 | 819 | 1 | 0 | 17.5465  | 0        | -18.0465  |
| 820 | 820 | 1 | 0 | 19.30115 | 1.75465  | -16.29185 |
| 821 | 821 | 1 | 0 | 17.5465  | 0        | -14.5372  |
| 822 | 822 | 1 | 0 | 19.30115 | 1.75465  | -12.78255 |
| 823 | 823 | 1 | 0 | 17.5465  | 0        | -11.0279  |
| 824 | 824 | 1 | 0 | 19.30115 | 1.75465  | -9.27325  |
| 825 | 825 | 1 | 0 | 17.5465  | 0        | -7.5186   |
| 826 | 826 | 1 | 0 | 19.30115 | 1.75465  | -5.76395  |
| 827 | 827 | 1 | 0 | 17.5465  | 0        | -4.0093   |
| 828 | 828 | 1 | 0 | 19.30115 | 1.75465  | -2.25465  |
| 829 | 829 | 1 | 0 | 17.5465  | 3.5093   | -32.0837  |
| 830 | 830 | 1 | 0 | 19.30115 | 5.26395  | -30.32905 |
| 831 | 831 | 1 | 0 | 17.5465  | 3.5093   | -28.5744  |
| 832 | 832 | 1 | 0 | 19.30115 | 5.26395  | -26.81975 |
| 833 | 833 | 1 | 0 | 17.5465  | 3.5093   | -25.0651  |
| 834 | 834 | 1 | 0 | 19.30115 | 5.26395  | -23.31045 |
| 835 | 835 | 1 | 0 | 17.5465  | 3.5093   | -21.5558  |
| 836 | 836 | 1 | 0 | 19.30115 | 5.26395  | -19.80115 |
| 837 | 837 | 1 | 0 | 17.5465  | 3.5093   | -18.0465  |
| 838 | 838 | 1 | 0 | 19.30115 | 5.26395  | -16.29185 |
| 839 | 839 | 1 | 0 | 17.5465  | 3.5093   | -14.5372  |
| 840 | 840 | 1 | 0 | 19.30115 | 5.26395  | -12.78255 |
| 841 | 841 | 1 | 0 | 17.5465  | 3.5093   | -11.0279  |
| 842 | 842 | 1 | 0 | 19.30115 | 5.26395  | -9.27325  |
| 843 | 843 | 1 | 0 | 17.5465  | 3.5093   | -7.5186   |
| 844 | 844 | 1 | 0 | 19.30115 | 5.26395  | -5.76395  |
| 845 | 845 | 1 | 0 | 17.5465  | 3.5093   | -4.0093   |
| 846 | 846 | 1 | 0 | 19.30115 | 5.26395  | -2.25465  |
| 847 | 847 | 1 | 0 | 17.5465  | 7.0186   | -32.0837  |
| 848 | 848 | 1 | 0 | 19.30115 | 8.77325  | -30.32905 |
| 849 | 849 | 1 | 0 | 17.5465  | 7.0186   | -28.5744  |
| 850 | 850 | 1 | 0 | 19.30115 | 8.77325  | -26.81975 |
| 851 | 851 | 1 | 0 | 17.5465  | 7.0186   | -25.0651  |
| 852 | 852 | 1 | 0 | 19.30115 | 8.77325  | -23.31045 |
| 853 | 853 | 1 | 0 | 17.5465  | 7.0186   | -21.5558  |
| 854 | 854 | 1 | 0 | 19.30115 | 8.77325  | -19.80115 |
| 855 | 855 | 1 | 0 | 17.5465  | 7.0186   | -18.0465  |
| 856 | 856 | 1 | 0 | 19.30115 | 8.77325  | -16.29185 |
| 857 | 857 | 1 | 0 | 17.5465  | 7.0186   | -14.5372  |
| 858 | 858 | 1 | 0 | 19.30115 | 8.77325  | -12.78255 |
| 859 | 859 | 1 | 0 | 17.5465  | 7.0186   | -11.0279  |
| 860 | 860 | 1 | 0 | 19.30115 | 8.77325  | -9.27325  |
| 861 | 861 | 1 | 0 | 17.5465  | 7.0186   | -7.5186   |
| 862 | 862 | 1 | 0 | 19.30115 | 8.77325  | -5.76395  |
| 863 | 863 | 1 | 0 | 17.5465  | 7.0186   | -4.0093   |
| 864 | 864 | 1 | 0 | 19.30115 | 8.77325  | -2.25465  |
| 865 | 865 | 1 | 0 | 17.5465  | 10.5279  | -32.0837  |
| 866 | 866 | 1 | 0 | 19.30115 | 12.28255 | -30.32905 |
| 867 | 867 | 1 | 0 | 17.5465  | 10.5279  | -28.5744  |
| 868 | 868 | 1 | 0 | 19.30115 | 12.28255 | -26.81975 |

|     |     |   |   |          |          |           |
|-----|-----|---|---|----------|----------|-----------|
| 869 | 869 | 1 | 0 | 17.5465  | 10.5279  | -25.0651  |
| 870 | 870 | 1 | 0 | 19.30115 | 12.28255 | -23.31045 |
| 871 | 871 | 1 | 0 | 17.5465  | 10.5279  | -21.5558  |
| 872 | 872 | 1 | 0 | 19.30115 | 12.28255 | -19.80115 |
| 873 | 873 | 1 | 0 | 17.5465  | 10.5279  | -18.0465  |
| 874 | 874 | 1 | 0 | 19.30115 | 12.28255 | -16.29185 |
| 875 | 875 | 1 | 0 | 17.5465  | 10.5279  | -14.5372  |
| 876 | 876 | 1 | 0 | 19.30115 | 12.28255 | -12.78255 |
| 877 | 877 | 1 | 0 | 17.5465  | 10.5279  | -11.0279  |
| 878 | 878 | 1 | 0 | 19.30115 | 12.28255 | -9.27325  |
| 879 | 879 | 1 | 0 | 17.5465  | 10.5279  | -7.5186   |
| 880 | 880 | 1 | 0 | 19.30115 | 12.28255 | -5.76395  |
| 881 | 881 | 1 | 0 | 17.5465  | 10.5279  | -4.0093   |
| 882 | 882 | 1 | 0 | 19.30115 | 12.28255 | -2.25465  |
| 883 | 883 | 1 | 0 | 17.5465  | 14.0372  | -32.0837  |
| 884 | 884 | 1 | 0 | 19.30115 | 15.79185 | -30.32905 |
| 885 | 885 | 1 | 0 | 17.5465  | 14.0372  | -28.5744  |
| 886 | 886 | 1 | 0 | 19.30115 | 15.79185 | -26.81975 |
| 887 | 887 | 1 | 0 | 17.5465  | 14.0372  | -25.0651  |
| 888 | 888 | 1 | 0 | 19.30115 | 15.79185 | -23.31045 |
| 889 | 889 | 1 | 0 | 17.5465  | 14.0372  | -21.5558  |
| 890 | 890 | 1 | 0 | 19.30115 | 15.79185 | -19.80115 |
| 891 | 891 | 1 | 0 | 17.5465  | 14.0372  | -18.0465  |
| 892 | 892 | 1 | 0 | 19.30115 | 15.79185 | -16.29185 |
| 893 | 893 | 1 | 0 | 17.5465  | 14.0372  | -14.5372  |
| 894 | 894 | 1 | 0 | 19.30115 | 15.79185 | -12.78255 |
| 895 | 895 | 1 | 0 | 17.5465  | 14.0372  | -11.0279  |
| 896 | 896 | 1 | 0 | 19.30115 | 15.79185 | -9.27325  |
| 897 | 897 | 1 | 0 | 17.5465  | 14.0372  | -7.5186   |
| 898 | 898 | 1 | 0 | 19.30115 | 15.79185 | -5.76395  |
| 899 | 899 | 1 | 0 | 17.5465  | 14.0372  | -4.0093   |
| 900 | 900 | 1 | 0 | 19.30115 | 15.79185 | -2.25465  |
| 901 | 901 | 1 | 0 | 17.5465  | 17.5465  | -32.0837  |
| 902 | 902 | 1 | 0 | 19.30115 | 19.30115 | -30.32905 |
| 903 | 903 | 1 | 0 | 17.5465  | 17.5465  | -28.5744  |
| 904 | 904 | 1 | 0 | 19.30115 | 19.30115 | -26.81975 |
| 905 | 905 | 1 | 0 | 17.5465  | 17.5465  | -25.0651  |
| 906 | 906 | 1 | 0 | 19.30115 | 19.30115 | -23.31045 |
| 907 | 907 | 1 | 0 | 17.5465  | 17.5465  | -21.5558  |
| 908 | 908 | 1 | 0 | 19.30115 | 19.30115 | -19.80115 |
| 909 | 909 | 1 | 0 | 17.5465  | 17.5465  | -18.0465  |
| 910 | 910 | 1 | 0 | 19.30115 | 19.30115 | -16.29185 |
| 911 | 911 | 1 | 0 | 17.5465  | 17.5465  | -14.5372  |
| 912 | 912 | 1 | 0 | 19.30115 | 19.30115 | -12.78255 |
| 913 | 913 | 1 | 0 | 17.5465  | 17.5465  | -11.0279  |
| 914 | 914 | 1 | 0 | 19.30115 | 19.30115 | -9.27325  |
| 915 | 915 | 1 | 0 | 17.5465  | 17.5465  | -7.5186   |
| 916 | 916 | 1 | 0 | 19.30115 | 19.30115 | -5.76395  |
| 917 | 917 | 1 | 0 | 17.5465  | 17.5465  | -4.0093   |
| 918 | 918 | 1 | 0 | 19.30115 | 19.30115 | -2.25465  |
| 919 | 919 | 1 | 0 | 17.5465  | 21.0558  | -32.0837  |

|     |     |   |   |          |          |           |
|-----|-----|---|---|----------|----------|-----------|
| 920 | 920 | 1 | 0 | 19.30115 | 22.81045 | -30.32905 |
| 921 | 921 | 1 | 0 | 17.5465  | 21.0558  | -28.5744  |
| 922 | 922 | 1 | 0 | 19.30115 | 22.81045 | -26.81975 |
| 923 | 923 | 1 | 0 | 17.5465  | 21.0558  | -25.0651  |
| 924 | 924 | 1 | 0 | 19.30115 | 22.81045 | -23.31045 |
| 925 | 925 | 1 | 0 | 17.5465  | 21.0558  | -21.5558  |
| 926 | 926 | 1 | 0 | 19.30115 | 22.81045 | -19.80115 |
| 927 | 927 | 1 | 0 | 17.5465  | 21.0558  | -18.0465  |
| 928 | 928 | 1 | 0 | 19.30115 | 22.81045 | -16.29185 |
| 929 | 929 | 1 | 0 | 17.5465  | 21.0558  | -14.5372  |
| 930 | 930 | 1 | 0 | 19.30115 | 22.81045 | -12.78255 |
| 931 | 931 | 1 | 0 | 17.5465  | 21.0558  | -11.0279  |
| 932 | 932 | 1 | 0 | 19.30115 | 22.81045 | -9.27325  |
| 933 | 933 | 1 | 0 | 17.5465  | 21.0558  | -7.5186   |
| 934 | 934 | 1 | 0 | 19.30115 | 22.81045 | -5.76395  |
| 935 | 935 | 1 | 0 | 17.5465  | 21.0558  | -4.0093   |
| 936 | 936 | 1 | 0 | 19.30115 | 22.81045 | -2.25465  |
| 937 | 937 | 1 | 0 | 17.5465  | 24.5651  | -32.0837  |
| 938 | 938 | 1 | 0 | 19.30115 | 26.31975 | -30.32905 |
| 939 | 939 | 1 | 0 | 17.5465  | 24.5651  | -28.5744  |
| 940 | 940 | 1 | 0 | 19.30115 | 26.31975 | -26.81975 |
| 941 | 941 | 1 | 0 | 17.5465  | 24.5651  | -25.0651  |
| 942 | 942 | 1 | 0 | 19.30115 | 26.31975 | -23.31045 |
| 943 | 943 | 1 | 0 | 17.5465  | 24.5651  | -21.5558  |
| 944 | 944 | 1 | 0 | 19.30115 | 26.31975 | -19.80115 |
| 945 | 945 | 1 | 0 | 17.5465  | 24.5651  | -18.0465  |
| 946 | 946 | 1 | 0 | 19.30115 | 26.31975 | -16.29185 |
| 947 | 947 | 1 | 0 | 17.5465  | 24.5651  | -14.5372  |
| 948 | 948 | 1 | 0 | 19.30115 | 26.31975 | -12.78255 |
| 949 | 949 | 1 | 0 | 17.5465  | 24.5651  | -11.0279  |
| 950 | 950 | 1 | 0 | 19.30115 | 26.31975 | -9.27325  |
| 951 | 951 | 1 | 0 | 17.5465  | 24.5651  | -7.5186   |
| 952 | 952 | 1 | 0 | 19.30115 | 26.31975 | -5.76395  |
| 953 | 953 | 1 | 0 | 17.5465  | 24.5651  | -4.0093   |
| 954 | 954 | 1 | 0 | 19.30115 | 26.31975 | -2.25465  |
| 955 | 955 | 1 | 0 | 17.5465  | 28.0744  | -32.0837  |
| 956 | 956 | 1 | 0 | 19.30115 | 29.82905 | -30.32905 |
| 957 | 957 | 1 | 0 | 17.5465  | 28.0744  | -28.5744  |
| 958 | 958 | 1 | 0 | 19.30115 | 29.82905 | -26.81975 |
| 959 | 959 | 1 | 0 | 17.5465  | 28.0744  | -25.0651  |
| 960 | 960 | 1 | 0 | 19.30115 | 29.82905 | -23.31045 |
| 961 | 961 | 1 | 0 | 17.5465  | 28.0744  | -21.5558  |
| 962 | 962 | 1 | 0 | 19.30115 | 29.82905 | -19.80115 |
| 963 | 963 | 1 | 0 | 17.5465  | 28.0744  | -18.0465  |
| 964 | 964 | 1 | 0 | 19.30115 | 29.82905 | -16.29185 |
| 965 | 965 | 1 | 0 | 17.5465  | 28.0744  | -14.5372  |
| 966 | 966 | 1 | 0 | 19.30115 | 29.82905 | -12.78255 |
| 967 | 967 | 1 | 0 | 17.5465  | 28.0744  | -11.0279  |
| 968 | 968 | 1 | 0 | 19.30115 | 29.82905 | -9.27325  |
| 969 | 969 | 1 | 0 | 17.5465  | 28.0744  | -7.5186   |
| 970 | 970 | 1 | 0 | 19.30115 | 29.82905 | -5.76395  |

|      |      |   |   |          |          |           |
|------|------|---|---|----------|----------|-----------|
| 971  | 971  | 1 | 0 | 17.5465  | 28.0744  | -4.0093   |
| 972  | 972  | 1 | 0 | 19.30115 | 29.82905 | -2.25465  |
| 973  | 973  | 1 | 0 | 21.0558  | 0        | -32.0837  |
| 974  | 974  | 1 | 0 | 22.81045 | 1.75465  | -30.32905 |
| 975  | 975  | 1 | 0 | 21.0558  | 0        | -28.5744  |
| 976  | 976  | 1 | 0 | 22.81045 | 1.75465  | -26.81975 |
| 977  | 977  | 1 | 0 | 21.0558  | 0        | -25.0651  |
| 978  | 978  | 1 | 0 | 22.81045 | 1.75465  | -23.31045 |
| 979  | 979  | 1 | 0 | 21.0558  | 0        | -21.5558  |
| 980  | 980  | 1 | 0 | 22.81045 | 1.75465  | -19.80115 |
| 981  | 981  | 1 | 0 | 21.0558  | 0        | -18.0465  |
| 982  | 982  | 1 | 0 | 22.81045 | 1.75465  | -16.29185 |
| 983  | 983  | 1 | 0 | 21.0558  | 0        | -14.5372  |
| 984  | 984  | 1 | 0 | 22.81045 | 1.75465  | -12.78255 |
| 985  | 985  | 1 | 0 | 21.0558  | 0        | -11.0279  |
| 986  | 986  | 1 | 0 | 22.81045 | 1.75465  | -9.27325  |
| 987  | 987  | 1 | 0 | 21.0558  | 0        | -7.5186   |
| 988  | 988  | 1 | 0 | 22.81045 | 1.75465  | -5.76395  |
| 989  | 989  | 1 | 0 | 21.0558  | 0        | -4.0093   |
| 990  | 990  | 1 | 0 | 22.81045 | 1.75465  | -2.25465  |
| 991  | 991  | 1 | 0 | 21.0558  | 3.5093   | -32.0837  |
| 992  | 992  | 1 | 0 | 22.81045 | 5.26395  | -30.32905 |
| 993  | 993  | 1 | 0 | 21.0558  | 3.5093   | -28.5744  |
| 994  | 994  | 1 | 0 | 22.81045 | 5.26395  | -26.81975 |
| 995  | 995  | 1 | 0 | 21.0558  | 3.5093   | -25.0651  |
| 996  | 996  | 1 | 0 | 22.81045 | 5.26395  | -23.31045 |
| 997  | 997  | 1 | 0 | 21.0558  | 3.5093   | -21.5558  |
| 998  | 998  | 1 | 0 | 22.81045 | 5.26395  | -19.80115 |
| 999  | 999  | 1 | 0 | 21.0558  | 3.5093   | -18.0465  |
| 1000 | 1000 | 1 | 0 | 22.81045 | 5.26395  | -16.29185 |
| 1001 | 1001 | 1 | 0 | 21.0558  | 3.5093   | -14.5372  |
| 1002 | 1002 | 1 | 0 | 22.81045 | 5.26395  | -12.78255 |
| 1003 | 1003 | 1 | 0 | 21.0558  | 3.5093   | -11.0279  |
| 1004 | 1004 | 1 | 0 | 22.81045 | 5.26395  | -9.27325  |
| 1005 | 1005 | 1 | 0 | 21.0558  | 3.5093   | -7.5186   |
| 1006 | 1006 | 1 | 0 | 22.81045 | 5.26395  | -5.76395  |
| 1007 | 1007 | 1 | 0 | 21.0558  | 3.5093   | -4.0093   |
| 1008 | 1008 | 1 | 0 | 22.81045 | 5.26395  | -2.25465  |
| 1009 | 1009 | 1 | 0 | 21.0558  | 7.0186   | -32.0837  |
| 1010 | 1010 | 1 | 0 | 22.81045 | 8.77325  | -30.32905 |
| 1011 | 1011 | 1 | 0 | 21.0558  | 7.0186   | -28.5744  |
| 1012 | 1012 | 1 | 0 | 22.81045 | 8.77325  | -26.81975 |
| 1013 | 1013 | 1 | 0 | 21.0558  | 7.0186   | -25.0651  |
| 1014 | 1014 | 1 | 0 | 22.81045 | 8.77325  | -23.31045 |
| 1015 | 1015 | 1 | 0 | 21.0558  | 7.0186   | -21.5558  |
| 1016 | 1016 | 1 | 0 | 22.81045 | 8.77325  | -19.80115 |
| 1017 | 1017 | 1 | 0 | 21.0558  | 7.0186   | -18.0465  |
| 1018 | 1018 | 1 | 0 | 22.81045 | 8.77325  | -16.29185 |
| 1019 | 1019 | 1 | 0 | 21.0558  | 7.0186   | -14.5372  |
| 1020 | 1020 | 1 | 0 | 22.81045 | 8.77325  | -12.78255 |
| 1021 | 1021 | 1 | 0 | 21.0558  | 7.0186   | -11.0279  |

|      |      |   |   |          |          |           |
|------|------|---|---|----------|----------|-----------|
| 1022 | 1022 | 1 | 0 | 22.81045 | 8.77325  | -9.27325  |
| 1023 | 1023 | 1 | 0 | 21.0558  | 7.0186   | -7.5186   |
| 1024 | 1024 | 1 | 0 | 22.81045 | 8.77325  | -5.76395  |
| 1025 | 1025 | 1 | 0 | 21.0558  | 7.0186   | -4.0093   |
| 1026 | 1026 | 1 | 0 | 22.81045 | 8.77325  | -2.25465  |
| 1027 | 1027 | 1 | 0 | 21.0558  | 10.5279  | -32.0837  |
| 1028 | 1028 | 1 | 0 | 22.81045 | 12.28255 | -30.32905 |
| 1029 | 1029 | 1 | 0 | 21.0558  | 10.5279  | -28.5744  |
| 1030 | 1030 | 1 | 0 | 22.81045 | 12.28255 | -26.81975 |
| 1031 | 1031 | 1 | 0 | 21.0558  | 10.5279  | -25.0651  |
| 1032 | 1032 | 1 | 0 | 22.81045 | 12.28255 | -23.31045 |
| 1033 | 1033 | 1 | 0 | 21.0558  | 10.5279  | -21.5558  |
| 1034 | 1034 | 1 | 0 | 22.81045 | 12.28255 | -19.80115 |
| 1035 | 1035 | 1 | 0 | 21.0558  | 10.5279  | -18.0465  |
| 1036 | 1036 | 1 | 0 | 22.81045 | 12.28255 | -16.29185 |
| 1037 | 1037 | 1 | 0 | 21.0558  | 10.5279  | -14.5372  |
| 1038 | 1038 | 1 | 0 | 22.81045 | 12.28255 | -12.78255 |
| 1039 | 1039 | 1 | 0 | 21.0558  | 10.5279  | -11.0279  |
| 1040 | 1040 | 1 | 0 | 22.81045 | 12.28255 | -9.27325  |
| 1041 | 1041 | 1 | 0 | 21.0558  | 10.5279  | -7.5186   |
| 1042 | 1042 | 1 | 0 | 22.81045 | 12.28255 | -5.76395  |
| 1043 | 1043 | 1 | 0 | 21.0558  | 10.5279  | -4.0093   |
| 1044 | 1044 | 1 | 0 | 22.81045 | 12.28255 | -2.25465  |
| 1045 | 1045 | 1 | 0 | 21.0558  | 14.0372  | -32.0837  |
| 1046 | 1046 | 1 | 0 | 22.81045 | 15.79185 | -30.32905 |
| 1047 | 1047 | 1 | 0 | 21.0558  | 14.0372  | -28.5744  |
| 1048 | 1048 | 1 | 0 | 22.81045 | 15.79185 | -26.81975 |
| 1049 | 1049 | 1 | 0 | 21.0558  | 14.0372  | -25.0651  |
| 1050 | 1050 | 1 | 0 | 22.81045 | 15.79185 | -23.31045 |
| 1051 | 1051 | 1 | 0 | 21.0558  | 14.0372  | -21.5558  |
| 1052 | 1052 | 1 | 0 | 22.81045 | 15.79185 | -19.80115 |
| 1053 | 1053 | 1 | 0 | 21.0558  | 14.0372  | -18.0465  |
| 1054 | 1054 | 1 | 0 | 22.81045 | 15.79185 | -16.29185 |
| 1055 | 1055 | 1 | 0 | 21.0558  | 14.0372  | -14.5372  |
| 1056 | 1056 | 1 | 0 | 22.81045 | 15.79185 | -12.78255 |
| 1057 | 1057 | 1 | 0 | 21.0558  | 14.0372  | -11.0279  |
| 1058 | 1058 | 1 | 0 | 22.81045 | 15.79185 | -9.27325  |
| 1059 | 1059 | 1 | 0 | 21.0558  | 14.0372  | -7.5186   |
| 1060 | 1060 | 1 | 0 | 22.81045 | 15.79185 | -5.76395  |
| 1061 | 1061 | 1 | 0 | 21.0558  | 14.0372  | -4.0093   |
| 1062 | 1062 | 1 | 0 | 22.81045 | 15.79185 | -2.25465  |
| 1063 | 1063 | 1 | 0 | 21.0558  | 17.5465  | -32.0837  |
| 1064 | 1064 | 1 | 0 | 22.81045 | 19.30115 | -30.32905 |
| 1065 | 1065 | 1 | 0 | 21.0558  | 17.5465  | -28.5744  |
| 1066 | 1066 | 1 | 0 | 22.81045 | 19.30115 | -26.81975 |
| 1067 | 1067 | 1 | 0 | 21.0558  | 17.5465  | -25.0651  |
| 1068 | 1068 | 1 | 0 | 22.81045 | 19.30115 | -23.31045 |
| 1069 | 1069 | 1 | 0 | 21.0558  | 17.5465  | -21.5558  |
| 1070 | 1070 | 1 | 0 | 22.81045 | 19.30115 | -19.80115 |
| 1071 | 1071 | 1 | 0 | 21.0558  | 17.5465  | -18.0465  |
| 1072 | 1072 | 1 | 0 | 22.81045 | 19.30115 | -16.29185 |

|      |      |   |   |          |          |           |
|------|------|---|---|----------|----------|-----------|
| 1073 | 1073 | 1 | 0 | 21.0558  | 17.5465  | -14.5372  |
| 1074 | 1074 | 1 | 0 | 22.81045 | 19.30115 | -12.78255 |
| 1075 | 1075 | 1 | 0 | 21.0558  | 17.5465  | -11.0279  |
| 1076 | 1076 | 1 | 0 | 22.81045 | 19.30115 | -9.27325  |
| 1077 | 1077 | 1 | 0 | 21.0558  | 17.5465  | -7.5186   |
| 1078 | 1078 | 1 | 0 | 22.81045 | 19.30115 | -5.76395  |
| 1079 | 1079 | 1 | 0 | 21.0558  | 17.5465  | -4.0093   |
| 1080 | 1080 | 1 | 0 | 22.81045 | 19.30115 | -2.25465  |
| 1081 | 1081 | 1 | 0 | 21.0558  | 21.0558  | -32.0837  |
| 1082 | 1082 | 1 | 0 | 22.81045 | 22.81045 | -30.32905 |
| 1083 | 1083 | 1 | 0 | 21.0558  | 21.0558  | -28.5744  |
| 1084 | 1084 | 1 | 0 | 22.81045 | 22.81045 | -26.81975 |
| 1085 | 1085 | 1 | 0 | 21.0558  | 21.0558  | -25.0651  |
| 1086 | 1086 | 1 | 0 | 22.81045 | 22.81045 | -23.31045 |
| 1087 | 1087 | 1 | 0 | 21.0558  | 21.0558  | -21.5558  |
| 1088 | 1088 | 1 | 0 | 22.81045 | 22.81045 | -19.80115 |
| 1089 | 1089 | 1 | 0 | 21.0558  | 21.0558  | -18.0465  |
| 1090 | 1090 | 1 | 0 | 22.81045 | 22.81045 | -16.29185 |
| 1091 | 1091 | 1 | 0 | 21.0558  | 21.0558  | -14.5372  |
| 1092 | 1092 | 1 | 0 | 22.81045 | 22.81045 | -12.78255 |
| 1093 | 1093 | 1 | 0 | 21.0558  | 21.0558  | -11.0279  |
| 1094 | 1094 | 1 | 0 | 22.81045 | 22.81045 | -9.27325  |
| 1095 | 1095 | 1 | 0 | 21.0558  | 21.0558  | -7.5186   |
| 1096 | 1096 | 1 | 0 | 22.81045 | 22.81045 | -5.76395  |
| 1097 | 1097 | 1 | 0 | 21.0558  | 21.0558  | -4.0093   |
| 1098 | 1098 | 1 | 0 | 22.81045 | 22.81045 | -2.25465  |
| 1099 | 1099 | 1 | 0 | 21.0558  | 24.5651  | -32.0837  |
| 1100 | 1100 | 1 | 0 | 22.81045 | 26.31975 | -30.32905 |
| 1101 | 1101 | 1 | 0 | 21.0558  | 24.5651  | -28.5744  |
| 1102 | 1102 | 1 | 0 | 22.81045 | 26.31975 | -26.81975 |
| 1103 | 1103 | 1 | 0 | 21.0558  | 24.5651  | -25.0651  |
| 1104 | 1104 | 1 | 0 | 22.81045 | 26.31975 | -23.31045 |
| 1105 | 1105 | 1 | 0 | 21.0558  | 24.5651  | -21.5558  |
| 1106 | 1106 | 1 | 0 | 22.81045 | 26.31975 | -19.80115 |
| 1107 | 1107 | 1 | 0 | 21.0558  | 24.5651  | -18.0465  |
| 1108 | 1108 | 1 | 0 | 22.81045 | 26.31975 | -16.29185 |
| 1109 | 1109 | 1 | 0 | 21.0558  | 24.5651  | -14.5372  |
| 1110 | 1110 | 1 | 0 | 22.81045 | 26.31975 | -12.78255 |
| 1111 | 1111 | 1 | 0 | 21.0558  | 24.5651  | -11.0279  |
| 1112 | 1112 | 1 | 0 | 22.81045 | 26.31975 | -9.27325  |
| 1113 | 1113 | 1 | 0 | 21.0558  | 24.5651  | -7.5186   |
| 1114 | 1114 | 1 | 0 | 22.81045 | 26.31975 | -5.76395  |
| 1115 | 1115 | 1 | 0 | 21.0558  | 24.5651  | -4.0093   |
| 1116 | 1116 | 1 | 0 | 22.81045 | 26.31975 | -2.25465  |
| 1117 | 1117 | 1 | 0 | 21.0558  | 28.0744  | -32.0837  |
| 1118 | 1118 | 1 | 0 | 22.81045 | 29.82905 | -30.32905 |
| 1119 | 1119 | 1 | 0 | 21.0558  | 28.0744  | -28.5744  |
| 1120 | 1120 | 1 | 0 | 22.81045 | 29.82905 | -26.81975 |
| 1121 | 1121 | 1 | 0 | 21.0558  | 28.0744  | -25.0651  |
| 1122 | 1122 | 1 | 0 | 22.81045 | 29.82905 | -23.31045 |
| 1123 | 1123 | 1 | 0 | 21.0558  | 28.0744  | -21.5558  |

|      |      |   |   |          |          |           |
|------|------|---|---|----------|----------|-----------|
| 1124 | 1124 | 1 | 0 | 22.81045 | 29.82905 | -19.80115 |
| 1125 | 1125 | 1 | 0 | 21.0558  | 28.0744  | -18.0465  |
| 1126 | 1126 | 1 | 0 | 22.81045 | 29.82905 | -16.29185 |
| 1127 | 1127 | 1 | 0 | 21.0558  | 28.0744  | -14.5372  |
| 1128 | 1128 | 1 | 0 | 22.81045 | 29.82905 | -12.78255 |
| 1129 | 1129 | 1 | 0 | 21.0558  | 28.0744  | -11.0279  |
| 1130 | 1130 | 1 | 0 | 22.81045 | 29.82905 | -9.27325  |
| 1131 | 1131 | 1 | 0 | 21.0558  | 28.0744  | -7.5186   |
| 1132 | 1132 | 1 | 0 | 22.81045 | 29.82905 | -5.76395  |
| 1133 | 1133 | 1 | 0 | 21.0558  | 28.0744  | -4.0093   |
| 1134 | 1134 | 1 | 0 | 22.81045 | 29.82905 | -2.25465  |
| 1135 | 1135 | 1 | 0 | 24.5651  | 0        | -32.0837  |
| 1136 | 1136 | 1 | 0 | 26.31975 | 1.75465  | -30.32905 |
| 1137 | 1137 | 1 | 0 | 24.5651  | 0        | -28.5744  |
| 1138 | 1138 | 1 | 0 | 26.31975 | 1.75465  | -26.81975 |
| 1139 | 1139 | 1 | 0 | 24.5651  | 0        | -25.0651  |
| 1140 | 1140 | 1 | 0 | 26.31975 | 1.75465  | -23.31045 |
| 1141 | 1141 | 1 | 0 | 24.5651  | 0        | -21.5558  |
| 1142 | 1142 | 1 | 0 | 26.31975 | 1.75465  | -19.80115 |
| 1143 | 1143 | 1 | 0 | 24.5651  | 0        | -18.0465  |
| 1144 | 1144 | 1 | 0 | 26.31975 | 1.75465  | -16.29185 |
| 1145 | 1145 | 1 | 0 | 24.5651  | 0        | -14.5372  |
| 1146 | 1146 | 1 | 0 | 26.31975 | 1.75465  | -12.78255 |
| 1147 | 1147 | 1 | 0 | 24.5651  | 0        | -11.0279  |
| 1148 | 1148 | 1 | 0 | 26.31975 | 1.75465  | -9.27325  |
| 1149 | 1149 | 1 | 0 | 24.5651  | 0        | -7.5186   |
| 1150 | 1150 | 1 | 0 | 26.31975 | 1.75465  | -5.76395  |
| 1151 | 1151 | 1 | 0 | 24.5651  | 0        | -4.0093   |
| 1152 | 1152 | 1 | 0 | 26.31975 | 1.75465  | -2.25465  |
| 1153 | 1153 | 1 | 0 | 24.5651  | 3.5093   | -32.0837  |
| 1154 | 1154 | 1 | 0 | 26.31975 | 5.26395  | -30.32905 |
| 1155 | 1155 | 1 | 0 | 24.5651  | 3.5093   | -28.5744  |
| 1156 | 1156 | 1 | 0 | 26.31975 | 5.26395  | -26.81975 |
| 1157 | 1157 | 1 | 0 | 24.5651  | 3.5093   | -25.0651  |
| 1158 | 1158 | 1 | 0 | 26.31975 | 5.26395  | -23.31045 |
| 1159 | 1159 | 1 | 0 | 24.5651  | 3.5093   | -21.5558  |
| 1160 | 1160 | 1 | 0 | 26.31975 | 5.26395  | -19.80115 |
| 1161 | 1161 | 1 | 0 | 24.5651  | 3.5093   | -18.0465  |
| 1162 | 1162 | 1 | 0 | 26.31975 | 5.26395  | -16.29185 |
| 1163 | 1163 | 1 | 0 | 24.5651  | 3.5093   | -14.5372  |
| 1164 | 1164 | 1 | 0 | 26.31975 | 5.26395  | -12.78255 |
| 1165 | 1165 | 1 | 0 | 24.5651  | 3.5093   | -11.0279  |
| 1166 | 1166 | 1 | 0 | 26.31975 | 5.26395  | -9.27325  |
| 1167 | 1167 | 1 | 0 | 24.5651  | 3.5093   | -7.5186   |
| 1168 | 1168 | 1 | 0 | 26.31975 | 5.26395  | -5.76395  |
| 1169 | 1169 | 1 | 0 | 24.5651  | 3.5093   | -4.0093   |
| 1170 | 1170 | 1 | 0 | 26.31975 | 5.26395  | -2.25465  |
| 1171 | 1171 | 1 | 0 | 24.5651  | 7.0186   | -32.0837  |
| 1172 | 1172 | 1 | 0 | 26.31975 | 8.77325  | -30.32905 |
| 1173 | 1173 | 1 | 0 | 24.5651  | 7.0186   | -28.5744  |
| 1174 | 1174 | 1 | 0 | 26.31975 | 8.77325  | -26.81975 |



|      |      |   |   |          |          |           |
|------|------|---|---|----------|----------|-----------|
| 1175 | 1175 | 1 | 0 | 24.5651  | 7.0186   | -25.0651  |
| 1176 | 1176 | 1 | 0 | 26.31975 | 8.77325  | -23.31045 |
| 1177 | 1177 | 1 | 0 | 24.5651  | 7.0186   | -21.5558  |
| 1178 | 1178 | 1 | 0 | 26.31975 | 8.77325  | -19.80115 |
| 1179 | 1179 | 1 | 0 | 24.5651  | 7.0186   | -18.0465  |
| 1180 | 1180 | 1 | 0 | 26.31975 | 8.77325  | -16.29185 |
| 1181 | 1181 | 1 | 0 | 24.5651  | 7.0186   | -14.5372  |
| 1182 | 1182 | 1 | 0 | 26.31975 | 8.77325  | -12.78255 |
| 1183 | 1183 | 1 | 0 | 24.5651  | 7.0186   | -11.0279  |
| 1184 | 1184 | 1 | 0 | 26.31975 | 8.77325  | -9.27325  |
| 1185 | 1185 | 1 | 0 | 24.5651  | 7.0186   | -7.5186   |
| 1186 | 1186 | 1 | 0 | 26.31975 | 8.77325  | -5.76395  |
| 1187 | 1187 | 1 | 0 | 24.5651  | 7.0186   | -4.0093   |
| 1188 | 1188 | 1 | 0 | 26.31975 | 8.77325  | -2.25465  |
| 1189 | 1189 | 1 | 0 | 24.5651  | 10.5279  | -32.0837  |
| 1190 | 1190 | 1 | 0 | 26.31975 | 12.28255 | -30.32905 |
| 1191 | 1191 | 1 | 0 | 24.5651  | 10.5279  | -28.5744  |
| 1192 | 1192 | 1 | 0 | 26.31975 | 12.28255 | -26.81975 |
| 1193 | 1193 | 1 | 0 | 24.5651  | 10.5279  | -25.0651  |
| 1194 | 1194 | 1 | 0 | 26.31975 | 12.28255 | -23.31045 |
| 1195 | 1195 | 1 | 0 | 24.5651  | 10.5279  | -21.5558  |
| 1196 | 1196 | 1 | 0 | 26.31975 | 12.28255 | -19.80115 |
| 1197 | 1197 | 1 | 0 | 24.5651  | 10.5279  | -18.0465  |
| 1198 | 1198 | 1 | 0 | 26.31975 | 12.28255 | -16.29185 |
| 1199 | 1199 | 1 | 0 | 24.5651  | 10.5279  | -14.5372  |
| 1200 | 1200 | 1 | 0 | 26.31975 | 12.28255 | -12.78255 |
| 1201 | 1201 | 1 | 0 | 24.5651  | 10.5279  | -11.0279  |
| 1202 | 1202 | 1 | 0 | 26.31975 | 12.28255 | -9.27325  |
| 1203 | 1203 | 1 | 0 | 24.5651  | 10.5279  | -7.5186   |
| 1204 | 1204 | 1 | 0 | 26.31975 | 12.28255 | -5.76395  |
| 1205 | 1205 | 1 | 0 | 24.5651  | 10.5279  | -4.0093   |
| 1206 | 1206 | 1 | 0 | 26.31975 | 12.28255 | -2.25465  |
| 1207 | 1207 | 1 | 0 | 24.5651  | 14.0372  | -32.0837  |
| 1208 | 1208 | 1 | 0 | 26.31975 | 15.79185 | -30.32905 |
| 1209 | 1209 | 1 | 0 | 24.5651  | 14.0372  | -28.5744  |
| 1210 | 1210 | 1 | 0 | 26.31975 | 15.79185 | -26.81975 |
| 1211 | 1211 | 1 | 0 | 24.5651  | 14.0372  | -25.0651  |
| 1212 | 1212 | 1 | 0 | 26.31975 | 15.79185 | -23.31045 |
| 1213 | 1213 | 1 | 0 | 24.5651  | 14.0372  | -21.5558  |
| 1214 | 1214 | 1 | 0 | 26.31975 | 15.79185 | -19.80115 |
| 1215 | 1215 | 1 | 0 | 24.5651  | 14.0372  | -18.0465  |
| 1216 | 1216 | 1 | 0 | 26.31975 | 15.79185 | -16.29185 |
| 1217 | 1217 | 1 | 0 | 24.5651  | 14.0372  | -14.5372  |
| 1218 | 1218 | 1 | 0 | 26.31975 | 15.79185 | -12.78255 |
| 1219 | 1219 | 1 | 0 | 24.5651  | 14.0372  | -11.0279  |
| 1220 | 1220 | 1 | 0 | 26.31975 | 15.79185 | -9.27325  |
| 1221 | 1221 | 1 | 0 | 24.5651  | 14.0372  | -7.5186   |
| 1222 | 1222 | 1 | 0 | 26.31975 | 15.79185 | -5.76395  |
| 1223 | 1223 | 1 | 0 | 24.5651  | 14.0372  | -4.0093   |
| 1224 | 1224 | 1 | 0 | 26.31975 | 15.79185 | -2.25465  |
| 1225 | 1225 | 1 | 0 | 24.5651  | 17.5465  | -32.0837  |

|      |      |   |   |          |          |           |
|------|------|---|---|----------|----------|-----------|
| 1226 | 1226 | 1 | 0 | 26.31975 | 19.30115 | -30.32905 |
| 1227 | 1227 | 1 | 0 | 24.5651  | 17.5465  | -28.5744  |
| 1228 | 1228 | 1 | 0 | 26.31975 | 19.30115 | -26.81975 |
| 1229 | 1229 | 1 | 0 | 24.5651  | 17.5465  | -25.0651  |
| 1230 | 1230 | 1 | 0 | 26.31975 | 19.30115 | -23.31045 |
| 1231 | 1231 | 1 | 0 | 24.5651  | 17.5465  | -21.5558  |
| 1232 | 1232 | 1 | 0 | 26.31975 | 19.30115 | -19.80115 |
| 1233 | 1233 | 1 | 0 | 24.5651  | 17.5465  | -18.0465  |
| 1234 | 1234 | 1 | 0 | 26.31975 | 19.30115 | -16.29185 |
| 1235 | 1235 | 1 | 0 | 24.5651  | 17.5465  | -14.5372  |
| 1236 | 1236 | 1 | 0 | 26.31975 | 19.30115 | -12.78255 |
| 1237 | 1237 | 1 | 0 | 24.5651  | 17.5465  | -11.0279  |
| 1238 | 1238 | 1 | 0 | 26.31975 | 19.30115 | -9.27325  |
| 1239 | 1239 | 1 | 0 | 24.5651  | 17.5465  | -7.5186   |
| 1240 | 1240 | 1 | 0 | 26.31975 | 19.30115 | -5.76395  |
| 1241 | 1241 | 1 | 0 | 24.5651  | 17.5465  | -4.0093   |
| 1242 | 1242 | 1 | 0 | 26.31975 | 19.30115 | -2.25465  |
| 1243 | 1243 | 1 | 0 | 24.5651  | 21.0558  | -32.0837  |
| 1244 | 1244 | 1 | 0 | 26.31975 | 22.81045 | -30.32905 |
| 1245 | 1245 | 1 | 0 | 24.5651  | 21.0558  | -28.5744  |
| 1246 | 1246 | 1 | 0 | 26.31975 | 22.81045 | -26.81975 |
| 1247 | 1247 | 1 | 0 | 24.5651  | 21.0558  | -25.0651  |
| 1248 | 1248 | 1 | 0 | 26.31975 | 22.81045 | -23.31045 |
| 1249 | 1249 | 1 | 0 | 24.5651  | 21.0558  | -21.5558  |
| 1250 | 1250 | 1 | 0 | 26.31975 | 22.81045 | -19.80115 |
| 1251 | 1251 | 1 | 0 | 24.5651  | 21.0558  | -18.0465  |
| 1252 | 1252 | 1 | 0 | 26.31975 | 22.81045 | -16.29185 |
| 1253 | 1253 | 1 | 0 | 24.5651  | 21.0558  | -14.5372  |
| 1254 | 1254 | 1 | 0 | 26.31975 | 22.81045 | -12.78255 |
| 1255 | 1255 | 1 | 0 | 24.5651  | 21.0558  | -11.0279  |
| 1256 | 1256 | 1 | 0 | 26.31975 | 22.81045 | -9.27325  |
| 1257 | 1257 | 1 | 0 | 24.5651  | 21.0558  | -7.5186   |
| 1258 | 1258 | 1 | 0 | 26.31975 | 22.81045 | -5.76395  |
| 1259 | 1259 | 1 | 0 | 24.5651  | 21.0558  | -4.0093   |
| 1260 | 1260 | 1 | 0 | 26.31975 | 22.81045 | -2.25465  |
| 1261 | 1261 | 1 | 0 | 24.5651  | 24.5651  | -32.0837  |
| 1262 | 1262 | 1 | 0 | 26.31975 | 26.31975 | -30.32905 |
| 1263 | 1263 | 1 | 0 | 24.5651  | 24.5651  | -28.5744  |
| 1264 | 1264 | 1 | 0 | 26.31975 | 26.31975 | -26.81975 |
| 1265 | 1265 | 1 | 0 | 24.5651  | 24.5651  | -25.0651  |
| 1266 | 1266 | 1 | 0 | 26.31975 | 26.31975 | -23.31045 |
| 1267 | 1267 | 1 | 0 | 24.5651  | 24.5651  | -21.5558  |
| 1268 | 1268 | 1 | 0 | 26.31975 | 26.31975 | -19.80115 |
| 1269 | 1269 | 1 | 0 | 24.5651  | 24.5651  | -18.0465  |
| 1270 | 1270 | 1 | 0 | 26.31975 | 26.31975 | -16.29185 |
| 1271 | 1271 | 1 | 0 | 24.5651  | 24.5651  | -14.5372  |
| 1272 | 1272 | 1 | 0 | 26.31975 | 26.31975 | -12.78255 |
| 1273 | 1273 | 1 | 0 | 24.5651  | 24.5651  | -11.0279  |
| 1274 | 1274 | 1 | 0 | 26.31975 | 26.31975 | -9.27325  |
| 1275 | 1275 | 1 | 0 | 24.5651  | 24.5651  | -7.5186   |
| 1276 | 1276 | 1 | 0 | 26.31975 | 26.31975 | -5.76395  |

|      |      |   |   |            |            |             |             |
|------|------|---|---|------------|------------|-------------|-------------|
| 1277 | 1277 | 1 | 0 | 24.5651    | 24.5651    | -4.0093     |             |
| 1278 | 1278 | 1 | 0 | 26.31975   | 26.31975   | -2.25465    |             |
| 1279 | 1279 | 1 | 0 | 24.5651    | 28.0744    | -32.0837    |             |
| 1280 | 1280 | 1 | 0 | 26.31975   | 29.82905   | -30.32905   |             |
| 1281 | 1281 | 1 | 0 | 24.5651    | 28.0744    | -28.5744    |             |
| 1282 | 1282 | 1 | 0 | 26.31975   | 29.82905   | -26.81975   |             |
| 1283 | 1283 | 1 | 0 | 24.5651    | 28.0744    | -25.0651    |             |
| 1284 | 1284 | 1 | 0 | 26.31975   | 29.82905   | -23.31045   |             |
| 1285 | 1285 | 1 | 0 | 24.5651    | 28.0744    | -21.5558    |             |
| 1286 | 1286 | 1 | 0 | 26.31975   | 29.82905   | -19.80115   |             |
| 1287 | 1287 | 1 | 0 | 24.5651    | 28.0744    | -18.0465    |             |
| 1288 | 1288 | 1 | 0 | 26.31975   | 29.82905   | -16.29185   |             |
| 1289 | 1289 | 1 | 0 | 24.5651    | 28.0744    | -14.5372    |             |
| 1290 | 1290 | 1 | 0 | 26.31975   | 29.82905   | -12.78255   |             |
| 1291 | 1291 | 1 | 0 | 24.5651    | 28.0744    | -11.0279    |             |
| 1292 | 1292 | 1 | 0 | 26.31975   | 29.82905   | -9.27325    |             |
| 1293 | 1293 | 1 | 0 | 24.5651    | 28.0744    | -7.5186     |             |
| 1294 | 1294 | 1 | 0 | 26.31975   | 29.82905   | -5.76395    |             |
| 1295 | 1295 | 1 | 0 | 24.5651    | 28.0744    | -4.0093     |             |
| 1296 | 1296 | 1 | 0 | 26.31975   | 29.82905   | -2.25465    |             |
| 1297 | 1297 | 2 | 0 | 0.25340022 | 4.38236058 |             | 31.63112455 |
| 1298 | 1298 | 2 | 0 | 3.26006411 | 4.38236058 |             | 42.9878055  |
| 1299 | 1299 | 2 | 0 | 6.26663374 | 4.38236058 | 54.34377394 |             |
| 1300 | 1300 | 2 | 0 | 3.67076674 | 4.38236058 |             | 8.91847515  |
| 1301 | 1301 | 2 | 0 | 6.67743064 | 4.38236058 |             | 20.2751561  |
| 1302 | 1302 | 2 | 0 | 0.22557995 | 7.2987995  | 41.44593602 |             |
| 1303 | 1303 | 2 | 0 | 3.23224384 | 7.2987995  | 52.80261697 |             |
| 1304 | 1304 | 2 | 0 | 0.63637689 | 7.29879949 |             | 7.37731819  |
| 1305 | 1305 | 2 | 0 | 3.64294647 | 7.29879949 |             | 18.73328663 |
| 1306 | 1306 | 2 | 0 | 6.64961037 | 7.29879949 |             | 30.08996758 |
| 1307 | 1307 | 2 | 0 | 2.55352356 | 4.07810384 |             | 39.82996561 |
| 1308 | 1308 | 2 | 0 | 5.56018745 | 4.07810384 |             | 51.18664656 |
| 1309 | 1309 | 2 | 0 | 2.96432054 | 4.07810383 | 5.76134777  |             |
| 1310 | 1310 | 2 | 0 | 5.97089008 | 4.07810384 |             | 17.11731622 |
| 1311 | 1311 | 2 | 0 | 8.97755398 | 4.07810384 |             | 28.47399717 |
| 1312 | 1312 | 2 | 0 | 1.04755105 | 0.02987049 |             | 49.23793445 |
| 1313 | 1313 | 2 | 0 | 1.45834798 | 0.02987049 |             | 15.16931661 |
| 1314 | 1314 | 2 | 0 | 4.46491757 | 0.02987049 |             | 26.52528505 |
| 1315 | 1315 | 2 | 0 | 7.47158146 | 0.02987049 |             | 37.881966   |
| 1316 | 1316 | 2 | 0 | 7.88228409 | 0.02987049 |             | 3.81263566  |
| 1317 | 1317 | 2 | 0 | 2.17196149 | 4.29681525 |             | 34.34222129 |
| 1318 | 1318 | 2 | 0 | 5.17862538 | 4.29681525 |             | 45.69890224 |
| 1319 | 1319 | 2 | 0 | 2.58275842 | 4.29681525 |             | 0.27360346  |
| 1320 | 1320 | 2 | 0 | 5.58932801 | 4.29681525 |             | 11.6295719  |
| 1321 | 1321 | 2 | 0 | 8.59599194 | 4.29681525 | 22.98625285 |             |
| 1322 | 1322 | 2 | 0 | 0.22614579 | 7.60110136 |             | 46.21262123 |
| 1323 | 1323 | 2 | 0 | 0.63684842 | 7.60110136 |             | 12.1440034  |
| 1324 | 1324 | 2 | 0 | 3.64351231 | 7.60110136 |             | 23.49997184 |
| 1325 | 1325 | 2 | 0 | 6.65008197 | 7.60110136 | 34.85665279 |             |
| 1326 | 1326 | 2 | 0 | 7.06087883 | 7.60110136 |             | 0.78732245  |
| 1327 | 1327 | 2 | 0 | 0.25340022 | 7.34688942 |             | 31.63112455 |

|      |      |   |   |            |             |             |
|------|------|---|---|------------|-------------|-------------|
| 1328 | 1328 | 2 | 0 | 3.26006411 | 7.34688942  | 42.9878055  |
| 1329 | 1329 | 2 | 0 | 6.26663377 | 7.34688942  | 54.34377394 |
| 1330 | 1330 | 2 | 0 | 3.67076674 | 7.34688942  | 8.91847515  |
| 1331 | 1331 | 2 | 0 | 6.67743064 | 7.34688942  | 20.2751561  |
| 1332 | 1332 | 2 | 0 | 0.22557995 | 4.43045051  | 41.44593602 |
| 1333 | 1333 | 2 | 0 | 3.23224384 | 4.43045051  | 52.80261697 |
| 1334 | 1334 | 2 | 0 | 0.63637689 | 4.43045051  | 7.37731819  |
| 1335 | 1335 | 2 | 0 | 3.64294647 | 4.43045051  | 18.73328663 |
| 1336 | 1336 | 2 | 0 | 6.64961037 | 4.43045051  | 30.08996758 |
| 1337 | 1337 | 2 | 0 | 2.55352356 | 7.65114617  | 39.82996561 |
| 1338 | 1338 | 2 | 0 | 5.56018745 | 7.65114617  | 51.18664656 |
| 1339 | 1339 | 2 | 0 | 2.96432057 | 7.65114616  | 5.76134777  |
| 1340 | 1340 | 2 | 0 | 5.97089008 | 7.65114616  | 17.11731622 |
| 1341 | 1341 | 2 | 0 | 8.97755398 | 7.65114617  | 28.47399717 |
| 1342 | 1342 | 2 | 0 | 1.04755105 | 3.87987951  | 49.23793445 |
| 1343 | 1343 | 2 | 0 | 1.45834798 | 3.87987951  | 15.16931661 |
| 1344 | 1344 | 2 | 0 | 4.46491757 | 3.87987951  | 26.52528505 |
| 1345 | 1345 | 2 | 0 | 7.47158146 | 3.87987951  | 37.881966   |
| 1346 | 1346 | 2 | 0 | 7.88228409 | 3.87987951  | 3.81263566  |
| 1347 | 1347 | 2 | 0 | 2.17196149 | 7.43243475  | 34.34222129 |
| 1348 | 1348 | 2 | 0 | 5.17862538 | 7.43243475  | 45.69890224 |
| 1349 | 1349 | 2 | 0 | 2.58275842 | 7.43243475  | 0.27360346  |
| 1350 | 1350 | 2 | 0 | 5.58932801 | 7.43243475  | 11.6295719  |
| 1351 | 1351 | 2 | 0 | 8.59599197 | 7.43243475  | 22.98625285 |
| 1352 | 1352 | 2 | 0 | 0.22614579 | 4.12814863  | 46.21262123 |
| 1353 | 1353 | 2 | 0 | 0.63684842 | 4.12814863  | 12.1440034  |
| 1354 | 1354 | 2 | 0 | 3.64351231 | 4.12814863  | 23.49997184 |
| 1355 | 1355 | 2 | 0 | 6.65008194 | 4.12814863  | 34.85665279 |
| 1356 | 1356 | 2 | 0 | 7.06087883 | 4.12814863  | 0.78732245  |
| 1357 | 1357 | 2 | 0 | 2.80334016 | 1.954875    | 29.18579366 |
| 1358 | 1358 | 2 | 0 | 5.81000405 | 1.954875    | 40.54247461 |
| 1359 | 1359 | 2 | 0 | 8.81657363 | 1.954875    | 51.89844305 |
| 1360 | 1360 | 2 | 0 | 6.22070668 | 1.954875    | 6.47314427  |
| 1361 | 1361 | 2 | 0 | 9.22737057 | 1.954875    | 17.82982522 |
| 1362 | 1362 | 2 | 0 | 1.04745674 | 1.954875    | 55.06055799 |
| 1363 | 1363 | 2 | 0 | 1.45815937 | 1.954875    | 20.99194016 |
| 1364 | 1364 | 2 | 0 | 4.46482326 | 1.954875    | 32.3479086  |
| 1365 | 1365 | 2 | 0 | 7.47139285 | 1.954875    | 43.70458955 |
| 1366 | 1366 | 2 | 0 | 7.88218979 | 1.954875    | 9.63525921  |
| 1367 | 1367 | 2 | 0 | 0.25340022 | 12.20186058 | 31.63112455 |
| 1368 | 1368 | 2 | 0 | 3.26006411 | 12.20186058 | 42.9878055  |
| 1369 | 1369 | 2 | 0 | 6.26663377 | 12.20186058 | 54.34377394 |
| 1370 | 1370 | 2 | 0 | 3.67076674 | 12.20186058 | 8.91847515  |
| 1371 | 1371 | 2 | 0 | 6.67743064 | 12.20186058 | 20.2751561  |
| 1372 | 1372 | 2 | 0 | 0.22557995 | 15.1182995  | 41.44593602 |
| 1373 | 1373 | 2 | 0 | 3.23224384 | 15.1182995  | 52.80261697 |
| 1374 | 1374 | 2 | 0 | 0.63637689 | 15.11829949 | 7.37731819  |
| 1375 | 1375 | 2 | 0 | 3.64294647 | 15.11829949 | 18.73328663 |
| 1376 | 1376 | 2 | 0 | 6.64961037 | 15.11829949 | 30.08996758 |
| 1377 | 1377 | 2 | 0 | 2.55352356 | 11.89760384 | 39.82996561 |
| 1378 | 1378 | 2 | 0 | 5.56018745 | 11.89760384 | 51.18664656 |

|      |      |   |   |            |             |             |
|------|------|---|---|------------|-------------|-------------|
| 1379 | 1379 | 2 | 0 | 2.9643205  | 11.89760383 | 5.76134777  |
| 1380 | 1380 | 2 | 0 | 5.97089008 | 11.89760384 | 17.11731622 |
| 1381 | 1381 | 2 | 0 | 8.97755398 | 11.89760384 | 28.47399717 |
| 1382 | 1382 | 2 | 0 | 1.04755105 | 7.84937049  | 49.23793445 |
| 1383 | 1383 | 2 | 0 | 1.45834798 | 7.84937049  | 15.16931661 |
| 1384 | 1384 | 2 | 0 | 4.46491757 | 7.84937049  | 26.52528505 |
| 1385 | 1385 | 2 | 0 | 7.47158146 | 7.84937049  | 37.881966   |
| 1386 | 1386 | 2 | 0 | 7.88228409 | 7.84937049  | 3.81263566  |
| 1387 | 1387 | 2 | 0 | 2.17196149 | 12.11631525 | 34.34222129 |
| 1388 | 1388 | 2 | 0 | 5.17862538 | 12.11631525 | 45.69890224 |
| 1389 | 1389 | 2 | 0 | 2.58275842 | 12.11631525 | 0.27360346  |
| 1390 | 1390 | 2 | 0 | 5.58932801 | 12.11631525 | 11.6295719  |
| 1391 | 1391 | 2 | 0 | 8.5959919  | 12.11631525 | 22.98625285 |
| 1392 | 1392 | 2 | 0 | 0.22614579 | 15.42060136 | 46.21262123 |
| 1393 | 1393 | 2 | 0 | 0.63684842 | 15.42060136 | 12.1440034  |
| 1394 | 1394 | 2 | 0 | 3.64351231 | 15.42060136 | 23.49997184 |
| 1395 | 1395 | 2 | 0 | 6.6500819  | 15.42060136 | 34.85665279 |
| 1396 | 1396 | 2 | 0 | 7.06087883 | 15.42060136 | 0.78732245  |
| 1397 | 1397 | 2 | 0 | 0.25340022 | 15.16638942 | 31.63112455 |
| 1398 | 1398 | 2 | 0 | 3.26006411 | 15.16638942 | 42.9878055  |
| 1399 | 1399 | 2 | 0 | 6.2666337  | 15.16638942 | 54.34377394 |
| 1400 | 1400 | 2 | 0 | 3.67076674 | 15.16638942 | 8.91847515  |
| 1401 | 1401 | 2 | 0 | 6.67743064 | 15.16638942 | 20.2751561  |
| 1402 | 1402 | 2 | 0 | 0.22557995 | 12.24995051 | 41.44593602 |
| 1403 | 1403 | 2 | 0 | 3.23224384 | 12.24995051 | 52.80261697 |
| 1404 | 1404 | 2 | 0 | 0.63637689 | 12.24995051 | 7.37731819  |
| 1405 | 1405 | 2 | 0 | 3.64294647 | 12.24995051 | 18.73328663 |
| 1406 | 1406 | 2 | 0 | 6.64961037 | 12.24995051 | 30.08996758 |
| 1407 | 1407 | 2 | 0 | 2.55352356 | 15.47064617 | 39.82996561 |
| 1408 | 1408 | 2 | 0 | 5.56018745 | 15.47064617 | 51.18664656 |
| 1409 | 1409 | 2 | 0 | 2.9643205  | 15.47064616 | 5.76134777  |
| 1410 | 1410 | 2 | 0 | 5.97089008 | 15.47064616 | 17.11731622 |
| 1411 | 1411 | 2 | 0 | 8.97755398 | 15.47064617 | 28.47399717 |
| 1412 | 1412 | 2 | 0 | 1.04755105 | 11.69937951 | 49.23793445 |
| 1413 | 1413 | 2 | 0 | 1.45834798 | 11.69937951 | 15.16931661 |
| 1414 | 1414 | 2 | 0 | 4.46491757 | 11.69937951 | 26.52528505 |
| 1415 | 1415 | 2 | 0 | 7.47158146 | 11.69937951 | 37.881966   |
| 1416 | 1416 | 2 | 0 | 7.88228409 | 11.69937951 | 3.81263566  |
| 1417 | 1417 | 2 | 0 | 2.17196149 | 15.25193475 | 34.34222129 |
| 1418 | 1418 | 2 | 0 | 5.17862538 | 15.25193475 | 45.69890224 |
| 1419 | 1419 | 2 | 0 | 2.58275842 | 15.25193475 | 0.27360346  |
| 1420 | 1420 | 2 | 0 | 5.58932801 | 15.25193475 | 11.6295719  |
| 1421 | 1421 | 2 | 0 | 8.5959919  | 15.25193475 | 22.98625285 |
| 1422 | 1422 | 2 | 0 | 0.22614579 | 11.94764863 | 46.21262123 |
| 1423 | 1423 | 2 | 0 | 0.63684842 | 11.94764863 | 12.1440034  |
| 1424 | 1424 | 2 | 0 | 3.64351231 | 11.94764863 | 23.49997184 |
| 1425 | 1425 | 2 | 0 | 6.6500819  | 11.94764863 | 34.85665279 |
| 1426 | 1426 | 2 | 0 | 7.06087883 | 11.94764863 | 0.78732245  |
| 1427 | 1427 | 2 | 0 | 2.80334016 | 9.774375    | 29.18579366 |
| 1428 | 1428 | 2 | 0 | 5.81000405 | 9.774375    | 40.54247461 |
| 1429 | 1429 | 2 | 0 | 8.81657363 | 9.774375    | 51.89844305 |

|      |      |   |   |            |             |             |
|------|------|---|---|------------|-------------|-------------|
| 1430 | 1430 | 2 | 0 | 6.22070668 | 9.774375    | 6.47314427  |
| 1431 | 1431 | 2 | 0 | 9.22737057 | 9.774375    | 17.82982522 |
| 1432 | 1432 | 2 | 0 | 1.04745674 | 9.774375    | 55.06055799 |
| 1433 | 1433 | 2 | 0 | 1.45815937 | 9.774375    | 20.99194016 |
| 1434 | 1434 | 2 | 0 | 4.46482326 | 9.774375    | 32.3479086  |
| 1435 | 1435 | 2 | 0 | 7.47139285 | 9.774375    | 43.70458955 |
| 1436 | 1436 | 2 | 0 | 7.88218979 | 9.774375    | 9.63525921  |
| 1437 | 1437 | 2 | 0 | 0.25340022 | 20.02136058 | 31.63112455 |
| 1438 | 1438 | 2 | 0 | 3.26006411 | 20.02136058 | 42.9878055  |
| 1439 | 1439 | 2 | 0 | 6.2666337  | 20.02136058 | 54.34377394 |
| 1440 | 1440 | 2 | 0 | 3.67076674 | 20.02136058 | 8.91847515  |
| 1441 | 1441 | 2 | 0 | 6.67743064 | 20.02136058 | 20.2751561  |
| 1442 | 1442 | 2 | 0 | 0.22557995 | 22.9377995  | 41.44593602 |
| 1443 | 1443 | 2 | 0 | 3.23224384 | 22.9377995  | 52.80261697 |
| 1444 | 1444 | 2 | 0 | 0.63637689 | 22.93779949 | 7.37731819  |
| 1445 | 1445 | 2 | 0 | 3.64294647 | 22.93779949 | 18.73328663 |
| 1446 | 1446 | 2 | 0 | 6.64961037 | 22.93779949 | 30.08996758 |
| 1447 | 1447 | 2 | 0 | 2.55352356 | 19.71710384 | 39.82996561 |
| 1448 | 1448 | 2 | 0 | 5.56018745 | 19.71710384 | 51.18664656 |
| 1449 | 1449 | 2 | 0 | 2.9643205  | 19.71710383 | 5.76134777  |
| 1450 | 1450 | 2 | 0 | 5.97089008 | 19.71710384 | 17.11731622 |
| 1451 | 1451 | 2 | 0 | 8.97755398 | 19.71710384 | 28.47399717 |
| 1452 | 1452 | 2 | 0 | 1.04755105 | 15.66887049 | 49.23793445 |
| 1453 | 1453 | 2 | 0 | 1.45834798 | 15.66887049 | 15.16931661 |
| 1454 | 1454 | 2 | 0 | 4.46491757 | 15.66887049 | 26.52528505 |
| 1455 | 1455 | 2 | 0 | 7.47158146 | 15.66887049 | 37.881966   |
| 1456 | 1456 | 2 | 0 | 7.88228409 | 15.66887049 | 3.81263566  |
| 1457 | 1457 | 2 | 0 | 2.17196149 | 19.93581525 | 34.34222129 |
| 1458 | 1458 | 2 | 0 | 5.17862538 | 19.93581525 | 45.69890224 |
| 1459 | 1459 | 2 | 0 | 2.58275842 | 19.93581525 | 0.27360346  |
| 1460 | 1460 | 2 | 0 | 5.58932801 | 19.93581525 | 11.6295719  |
| 1461 | 1461 | 2 | 0 | 8.5959919  | 19.93581525 | 22.98625285 |
| 1462 | 1462 | 2 | 0 | 0.22614579 | 23.24010136 | 46.21262123 |
| 1463 | 1463 | 2 | 0 | 0.63684842 | 23.24010136 | 12.14440034 |
| 1464 | 1464 | 2 | 0 | 3.64351231 | 23.24010136 | 23.49997184 |
| 1465 | 1465 | 2 | 0 | 6.6500819  | 23.24010136 | 34.85665279 |
| 1466 | 1466 | 2 | 0 | 7.06087883 | 23.24010136 | 0.78732245  |
| 1467 | 1467 | 2 | 0 | 0.25340022 | 22.98588942 | 31.63112455 |
| 1468 | 1468 | 2 | 0 | 3.26006411 | 22.98588942 | 42.9878055  |
| 1469 | 1469 | 2 | 0 | 6.2666337  | 22.98588942 | 54.34377394 |
| 1470 | 1470 | 2 | 0 | 3.67076674 | 22.98588942 | 8.91847515  |
| 1471 | 1471 | 2 | 0 | 6.67743064 | 22.98588942 | 20.2751561  |
| 1472 | 1472 | 2 | 0 | 0.22557995 | 20.06945051 | 41.44593602 |
| 1473 | 1473 | 2 | 0 | 3.23224384 | 20.06945051 | 52.80261697 |
| 1474 | 1474 | 2 | 0 | 0.63637689 | 20.06945051 | 7.37731819  |
| 1475 | 1475 | 2 | 0 | 3.64294647 | 20.06945051 | 18.73328663 |
| 1476 | 1476 | 2 | 0 | 6.64961037 | 20.06945051 | 30.08996758 |
| 1477 | 1477 | 2 | 0 | 2.55352356 | 23.29014617 | 39.82996561 |
| 1478 | 1478 | 2 | 0 | 5.56018745 | 23.29014617 | 51.18664656 |
| 1479 | 1479 | 2 | 0 | 2.9643205  | 23.29014616 | 5.76134777  |
| 1480 | 1480 | 2 | 0 | 5.97089008 | 23.29014616 | 17.11731622 |

|      |      |   |   |                      |                      |             |
|------|------|---|---|----------------------|----------------------|-------------|
| 1481 | 1481 | 2 | 0 | 8.97755398           | 23.29014617          | 28.47399717 |
| 1482 | 1482 | 2 | 0 | 1.04755105           | 19.51887951          | 49.23793445 |
| 1483 | 1483 | 2 | 0 | 1.45834798           | 19.51887951          | 15.16931661 |
| 1484 | 1484 | 2 | 0 | 4.46491757           | 19.51887951          | 26.52528505 |
| 1485 | 1485 | 2 | 0 | 7.47158146           | 19.51887951          | 37.881966   |
| 1486 | 1486 | 2 | 0 | 7.88228409           | 19.51887951          | 3.81263566  |
| 1487 | 1487 | 2 | 0 | 2.17196149           | 23.07143475          | 34.34222129 |
| 1488 | 1488 | 2 | 0 | 5.17862538           | 23.07143475          | 45.69890224 |
| 1489 | 1489 | 2 | 0 | 2.58275842           | 23.07143475          | 0.27360346  |
| 1490 | 1490 | 2 | 0 | 5.58932801           | 23.07143475          | 11.6295719  |
| 1491 | 1491 | 2 | 0 | 8.595991923.07143475 | 22.98625285          |             |
| 1492 | 1492 | 2 | 0 | 0.22614579           | 19.76714863          | 46.21262123 |
| 1493 | 1493 | 2 | 0 | 0.63684842           | 19.76714863          | 12.1440034  |
| 1494 | 1494 | 2 | 0 | 3.64351231           | 19.76714863          | 23.49997184 |
| 1495 | 1495 | 2 | 0 | 6.650081919.76714863 | 34.85665279          |             |
| 1496 | 1496 | 2 | 0 | 7.06087883           | 19.76714863          | 0.78732245  |
| 1497 | 1497 | 2 | 0 | 2.80334016           | 17.59387529.18579366 |             |
| 1498 | 1498 | 2 | 0 | 5.81000405           | 17.59387540.54247461 |             |
| 1499 | 1499 | 2 | 0 | 8.81657363           | 17.59387551.89844305 |             |
| 1500 | 1500 | 2 | 0 | 6.22070668           | 17.5938756.47314427  |             |
| 1501 | 1501 | 2 | 0 | 9.22737057           | 17.59387517.82982522 |             |
| 1502 | 1502 | 2 | 0 | 1.04745674           | 17.59387555.06055799 |             |
| 1503 | 1503 | 2 | 0 | 1.45815937           | 17.59387520.99194016 |             |
| 1504 | 1504 | 2 | 0 | 4.46482326           | 17.59387532.3479086  |             |
| 1505 | 1505 | 2 | 0 | 7.47139285           | 17.59387543.70458955 |             |
| 1506 | 1506 | 2 | 0 | 7.88218979           | 17.5938759.63525921  |             |
| 1507 | 1507 | 2 | 0 | 0.25340022           | 27.84086058          | 31.63112455 |
| 1508 | 1508 | 2 | 0 | 3.26006411           | 27.84086058          | 42.9878055  |
| 1509 | 1509 | 2 | 0 | 6.266633727.84086058 | 54.34377394          |             |
| 1510 | 1510 | 2 | 0 | 3.67076674           | 27.84086058          | 8.91847515  |
| 1511 | 1511 | 2 | 0 | 6.67743064           | 27.84086058          | 20.2751561  |
| 1512 | 1512 | 2 | 0 | 0.22557995           | 30.7572995           | 41.44593602 |
| 1513 | 1513 | 2 | 0 | 3.23224384           | 30.7572995           | 52.80261697 |
| 1514 | 1514 | 2 | 0 | 0.63637689           | 30.75729949          | 7.37731819  |
| 1515 | 1515 | 2 | 0 | 3.64294647           | 30.75729949          | 18.73328663 |
| 1516 | 1516 | 2 | 0 | 6.64961037           | 30.75729949          | 30.08996758 |
| 1517 | 1517 | 2 | 0 | 2.55352356           | 27.53660384          | 39.82996561 |
| 1518 | 1518 | 2 | 0 | 5.56018745           | 27.53660384          | 51.18664656 |
| 1519 | 1519 | 2 | 0 | 2.964320527.53660383 | 5.76134777           |             |
| 1520 | 1520 | 2 | 0 | 5.97089008           | 27.53660384          | 17.11731622 |
| 1521 | 1521 | 2 | 0 | 8.97755398           | 27.53660384          | 28.47399717 |
| 1522 | 1522 | 2 | 0 | 1.04755105           | 23.48837049          | 49.23793445 |
| 1523 | 1523 | 2 | 0 | 1.45834798           | 23.48837049          | 15.16931661 |
| 1524 | 1524 | 2 | 0 | 4.46491757           | 23.48837049          | 26.52528505 |
| 1525 | 1525 | 2 | 0 | 7.47158146           | 23.48837049          | 37.881966   |
| 1526 | 1526 | 2 | 0 | 7.88228409           | 23.48837049          | 3.81263566  |
| 1527 | 1527 | 2 | 0 | 2.17196149           | 27.75531525          | 34.34222129 |
| 1528 | 1528 | 2 | 0 | 5.17862538           | 27.75531525          | 45.69890224 |
| 1529 | 1529 | 2 | 0 | 2.58275842           | 27.75531525          | 0.27360346  |
| 1530 | 1530 | 2 | 0 | 5.58932801           | 27.75531525          | 11.6295719  |
| 1531 | 1531 | 2 | 0 | 8.595991927.75531525 | 22.98625285          |             |

|      |      |   |   |                      |                      |             |
|------|------|---|---|----------------------|----------------------|-------------|
| 1532 | 1532 | 2 | 0 | 0.22614579           | 31.05960136          | 46.21262123 |
| 1533 | 1533 | 2 | 0 | 0.63684842           | 31.05960136          | 12.1440034  |
| 1534 | 1534 | 2 | 0 | 3.64351231           | 31.05960136          | 23.49997184 |
| 1535 | 1535 | 2 | 0 | 6.650081931.05960136 | 34.85665279          |             |
| 1536 | 1536 | 2 | 0 | 7.06087883           | 31.05960136          | 0.78732245  |
| 1537 | 1537 | 2 | 0 | 0.25340022           | 30.80538942          | 31.63112455 |
| 1538 | 1538 | 2 | 0 | 3.26006411           | 30.80538942          | 42.9878055  |
| 1539 | 1539 | 2 | 0 | 6.266633730.80538942 | 54.34377394          |             |
| 1540 | 1540 | 2 | 0 | 3.67076674           | 30.80538942          | 8.91847515  |
| 1541 | 1541 | 2 | 0 | 6.67743064           | 30.80538942          | 20.2751561  |
| 1542 | 1542 | 2 | 0 | 0.22557995           | 27.88895051          | 41.44593602 |
| 1543 | 1543 | 2 | 0 | 3.23224384           | 27.88895051          | 52.80261697 |
| 1544 | 1544 | 2 | 0 | 0.63637689           | 27.88895051          | 7.37731819  |
| 1545 | 1545 | 2 | 0 | 3.64294647           | 27.88895051          | 18.73328663 |
| 1546 | 1546 | 2 | 0 | 6.64961037           | 27.88895051          | 30.08996758 |
| 1547 | 1547 | 2 | 0 | 2.55352356           | 31.10964617          | 39.82996561 |
| 1548 | 1548 | 2 | 0 | 5.56018745           | 31.10964617          | 51.18664656 |
| 1549 | 1549 | 2 | 0 | 2.964320531.10964616 | 5.76134777           |             |
| 1550 | 1550 | 2 | 0 | 5.97089008           | 31.10964616          | 17.11731622 |
| 1551 | 1551 | 2 | 0 | 8.97755398           | 31.10964617          | 28.47399717 |
| 1552 | 1552 | 2 | 0 | 1.04755105           | 27.33837951          | 49.23793445 |
| 1553 | 1553 | 2 | 0 | 1.45834798           | 27.33837951          | 15.16931661 |
| 1554 | 1554 | 2 | 0 | 4.46491757           | 27.33837951          | 26.52528505 |
| 1555 | 1555 | 2 | 0 | 7.47158146           | 27.33837951          | 37.881966   |
| 1556 | 1556 | 2 | 0 | 7.88228409           | 27.33837951          | 3.81263566  |
| 1557 | 1557 | 2 | 0 | 2.17196149           | 30.89093475          | 34.34222129 |
| 1558 | 1558 | 2 | 0 | 5.17862538           | 30.89093475          | 45.69890224 |
| 1559 | 1559 | 2 | 0 | 2.58275842           | 30.89093475          | 0.27360346  |
| 1560 | 1560 | 2 | 0 | 5.58932801           | 30.89093475          | 11.6295719  |
| 1561 | 1561 | 2 | 0 | 8.595991930.89093475 | 22.98625285          |             |
| 1562 | 1562 | 2 | 0 | 0.22614579           | 27.58664863          | 46.21262123 |
| 1563 | 1563 | 2 | 0 | 0.63684842           | 27.58664863          | 12.1440034  |
| 1564 | 1564 | 2 | 0 | 3.64351231           | 27.58664863          | 23.49997184 |
| 1565 | 1565 | 2 | 0 | 6.650081927.58664863 | 34.85665279          |             |
| 1566 | 1566 | 2 | 0 | 7.06087883           | 27.58664863          | 0.78732245  |
| 1567 | 1567 | 2 | 0 | 2.80334016           | 25.41337529.18579366 |             |
| 1568 | 1568 | 2 | 0 | 5.81000405           | 25.41337540.54247461 |             |
| 1569 | 1569 | 2 | 0 | 8.81657363           | 25.41337551.89844305 |             |
| 1570 | 1570 | 2 | 0 | 6.22070668           | 25.4133756.47314427  |             |
| 1571 | 1571 | 2 | 0 | 9.22737057           | 25.41337517.82982522 |             |
| 1572 | 1572 | 2 | 0 | 1.04745674           | 25.41337555.06055799 |             |
| 1573 | 1573 | 2 | 0 | 1.45815937           | 25.41337520.99194016 |             |
| 1574 | 1574 | 2 | 0 | 4.46482326           | 25.41337532.3479086  |             |
| 1575 | 1575 | 2 | 0 | 7.47139285           | 25.41337543.70458955 |             |
| 1576 | 1576 | 2 | 0 | 7.88218979           | 25.4133759.63525921  |             |
| 1577 | 1577 | 2 | 0 | 9.68400022           | 4.38236058           | 31.63112455 |
| 1578 | 1578 | 2 | 0 | 12.69066411          | 4.38236058           | 42.9878055  |
| 1579 | 1579 | 2 | 0 | 15.6972337           | 4.38236058           | 54.34377394 |
| 1580 | 1580 | 2 | 0 | 13.10136674          | 4.38236058           | 8.91847515  |
| 1581 | 1581 | 2 | 0 | 16.10803064          | 4.38236058           | 20.2751561  |
| 1582 | 1582 | 2 | 0 | 9.65617995           | 7.298799541.44593602 |             |



|      |      |   |   |             |            |             |
|------|------|---|---|-------------|------------|-------------|
| 1583 | 1583 | 2 | 0 | 12.66284384 | 7.2987995  | 52.80261697 |
| 1584 | 1584 | 2 | 0 | 10.06697689 | 7.29879949 | 7.37731819  |
| 1585 | 1585 | 2 | 0 | 13.07354647 | 7.29879949 | 18.73328663 |
| 1586 | 1586 | 2 | 0 | 16.08021037 | 7.29879949 | 30.08996758 |
| 1587 | 1587 | 2 | 0 | 11.98412356 | 4.07810384 | 39.82996561 |
| 1588 | 1588 | 2 | 0 | 14.99078745 | 4.07810384 | 51.18664656 |
| 1589 | 1589 | 2 | 0 | 12.3949205  | 4.07810383 | 5.76134777  |
| 1590 | 1590 | 2 | 0 | 15.40149008 | 4.07810384 | 17.11731622 |
| 1591 | 1591 | 2 | 0 | 18.40815398 | 4.07810384 | 28.47399717 |
| 1592 | 1592 | 2 | 0 | 10.47815105 | 0.02987049 | 49.23793445 |
| 1593 | 1593 | 2 | 0 | 10.88894798 | 0.02987049 | 15.16931661 |
| 1594 | 1594 | 2 | 0 | 13.89551757 | 0.02987049 | 26.52528505 |
| 1595 | 1595 | 2 | 0 | 16.90218146 | 0.02987049 | 37.881966   |
| 1596 | 1596 | 2 | 0 | 17.31288409 | 0.02987049 | 3.81263566  |
| 1597 | 1597 | 2 | 0 | 11.60256149 | 4.29681525 | 34.34222129 |
| 1598 | 1598 | 2 | 0 | 14.60922538 | 4.29681525 | 45.69890224 |
| 1599 | 1599 | 2 | 0 | 12.01335842 | 4.29681525 | 0.27360346  |
| 1600 | 1600 | 2 | 0 | 15.01992801 | 4.29681525 | 11.6295719  |
| 1601 | 1601 | 2 | 0 | 18.0265919  | 4.29681525 | 22.98625285 |
| 1602 | 1602 | 2 | 0 | 9.65674579  | 7.60110136 | 46.21262123 |
| 1603 | 1603 | 2 | 0 | 10.06744842 | 7.60110136 | 12.1440034  |
| 1604 | 1604 | 2 | 0 | 13.07411231 | 7.60110136 | 23.49997184 |
| 1605 | 1605 | 2 | 0 | 16.0806819  | 7.60110136 | 34.85665279 |
| 1606 | 1606 | 2 | 0 | 16.49147883 | 7.60110136 | 0.78732245  |
| 1607 | 1607 | 2 | 0 | 9.68400022  | 7.34688942 | 31.63112455 |
| 1608 | 1608 | 2 | 0 | 12.69066411 | 7.34688942 | 42.9878055  |
| 1609 | 1609 | 2 | 0 | 15.6972337  | 7.34688942 | 54.34377394 |
| 1610 | 1610 | 2 | 0 | 13.10136674 | 7.34688942 | 8.91847515  |
| 1611 | 1611 | 2 | 0 | 16.10803064 | 7.34688942 | 20.2751561  |
| 1612 | 1612 | 2 | 0 | 9.65617995  | 4.43045051 | 41.44593602 |
| 1613 | 1613 | 2 | 0 | 12.66284384 | 4.43045051 | 52.80261697 |
| 1614 | 1614 | 2 | 0 | 10.06697689 | 4.43045051 | 7.37731819  |
| 1615 | 1615 | 2 | 0 | 13.07354647 | 4.43045051 | 18.73328663 |
| 1616 | 1616 | 2 | 0 | 16.08021037 | 4.43045051 | 30.08996758 |
| 1617 | 1617 | 2 | 0 | 11.98412356 | 7.65114617 | 39.82996561 |
| 1618 | 1618 | 2 | 0 | 14.99078745 | 7.65114617 | 51.18664656 |
| 1619 | 1619 | 2 | 0 | 12.3949205  | 7.65114616 | 5.76134777  |
| 1620 | 1620 | 2 | 0 | 15.40149008 | 7.65114616 | 17.11731622 |
| 1621 | 1621 | 2 | 0 | 18.40815398 | 7.65114617 | 28.47399717 |
| 1622 | 1622 | 2 | 0 | 10.47815105 | 3.87987951 | 49.23793445 |
| 1623 | 1623 | 2 | 0 | 10.88894798 | 3.87987951 | 15.16931661 |
| 1624 | 1624 | 2 | 0 | 13.89551757 | 3.87987951 | 26.52528505 |
| 1625 | 1625 | 2 | 0 | 16.90218146 | 3.87987951 | 37.881966   |
| 1626 | 1626 | 2 | 0 | 17.31288409 | 3.87987951 | 3.81263566  |
| 1627 | 1627 | 2 | 0 | 11.60256149 | 7.43243475 | 34.34222129 |
| 1628 | 1628 | 2 | 0 | 14.60922538 | 7.43243475 | 45.69890224 |
| 1629 | 1629 | 2 | 0 | 12.01335842 | 7.43243475 | 0.27360346  |
| 1630 | 1630 | 2 | 0 | 15.01992801 | 7.43243475 | 11.6295719  |
| 1631 | 1631 | 2 | 0 | 18.0265919  | 7.43243475 | 22.98625285 |
| 1632 | 1632 | 2 | 0 | 9.65674579  | 4.12814863 | 46.21262123 |
| 1633 | 1633 | 2 | 0 | 10.06744842 | 4.12814863 | 12.1440034  |

|      |      |   |   |             |             |             |
|------|------|---|---|-------------|-------------|-------------|
| 1634 | 1634 | 2 | 0 | 13.07411231 | 4.12814863  | 23.49997184 |
| 1635 | 1635 | 2 | 0 | 16.0806819  | 4.12814863  | 34.85665279 |
| 1636 | 1636 | 2 | 0 | 16.49147883 | 4.12814863  | 0.78732245  |
| 1637 | 1637 | 2 | 0 | 12.23394016 | 1.954875    | 29.18579366 |
| 1638 | 1638 | 2 | 0 | 15.24060405 | 1.954875    | 40.54247461 |
| 1639 | 1639 | 2 | 0 | 18.24717363 | 1.954875    | 51.89844305 |
| 1640 | 1640 | 2 | 0 | 15.65130668 | 1.954875    | 6.47314427  |
| 1641 | 1641 | 2 | 0 | 18.65797057 | 1.954875    | 17.82982522 |
| 1642 | 1642 | 2 | 0 | 10.47805674 | 1.954875    | 55.06055799 |
| 1643 | 1643 | 2 | 0 | 10.88875937 | 1.954875    | 20.99194016 |
| 1644 | 1644 | 2 | 0 | 13.89542326 | 1.954875    | 32.3479086  |
| 1645 | 1645 | 2 | 0 | 16.90199285 | 1.954875    | 43.70458955 |
| 1646 | 1646 | 2 | 0 | 17.31278979 | 1.954875    | 9.63525921  |
| 1647 | 1647 | 2 | 0 | 9.68400022  | 12.20186058 | 31.63112455 |
| 1648 | 1648 | 2 | 0 | 12.69066411 | 12.20186058 | 42.9878055  |
| 1649 | 1649 | 2 | 0 | 15.6972337  | 12.20186058 | 54.34377394 |
| 1650 | 1650 | 2 | 0 | 13.10136674 | 12.20186058 | 8.91847515  |
| 1651 | 1651 | 2 | 0 | 16.10803064 | 12.20186058 | 20.2751561  |
| 1652 | 1652 | 2 | 0 | 9.65617995  | 15.1182995  | 41.44593602 |
| 1653 | 1653 | 2 | 0 | 12.66284384 | 15.1182995  | 52.80261697 |
| 1654 | 1654 | 2 | 0 | 10.06697689 | 15.11829949 | 7.37731819  |
| 1655 | 1655 | 2 | 0 | 13.07354647 | 15.11829949 | 18.73328663 |
| 1656 | 1656 | 2 | 0 | 16.08021037 | 15.11829949 | 30.08996758 |
| 1657 | 1657 | 2 | 0 | 11.98412356 | 11.89760384 | 39.82996561 |
| 1658 | 1658 | 2 | 0 | 14.99078745 | 11.89760384 | 51.18664656 |
| 1659 | 1659 | 2 | 0 | 12.3949205  | 11.89760383 | 5.76134777  |
| 1660 | 1660 | 2 | 0 | 15.40149008 | 11.89760384 | 17.11731622 |
| 1661 | 1661 | 2 | 0 | 18.40815398 | 11.89760384 | 28.47399717 |
| 1662 | 1662 | 2 | 0 | 10.47815105 | 7.84937049  | 49.23793445 |
| 1663 | 1663 | 2 | 0 | 10.88894798 | 7.84937049  | 15.16931661 |
| 1664 | 1664 | 2 | 0 | 13.89551757 | 7.84937049  | 26.52528505 |
| 1665 | 1665 | 2 | 0 | 16.90218146 | 7.84937049  | 37.881966   |
| 1666 | 1666 | 2 | 0 | 17.31288409 | 7.84937049  | 3.81263566  |
| 1667 | 1667 | 2 | 0 | 11.60256149 | 12.11631525 | 34.34222129 |
| 1668 | 1668 | 2 | 0 | 14.60922538 | 12.11631525 | 45.69890224 |
| 1669 | 1669 | 2 | 0 | 12.01335842 | 12.11631525 | 0.27360346  |
| 1670 | 1670 | 2 | 0 | 15.01992801 | 12.11631525 | 11.6295719  |
| 1671 | 1671 | 2 | 0 | 18.0265919  | 12.11631525 | 22.98625285 |
| 1672 | 1672 | 2 | 0 | 9.65674579  | 15.42060136 | 46.21262123 |
| 1673 | 1673 | 2 | 0 | 10.06744842 | 15.42060136 | 12.1440034  |
| 1674 | 1674 | 2 | 0 | 13.07411231 | 15.42060136 | 23.49997184 |
| 1675 | 1675 | 2 | 0 | 16.0806819  | 15.42060136 | 34.85665279 |
| 1676 | 1676 | 2 | 0 | 16.49147883 | 15.42060136 | 0.78732245  |
| 1677 | 1677 | 2 | 0 | 9.68400022  | 15.16638942 | 31.63112455 |
| 1678 | 1678 | 2 | 0 | 12.69066411 | 15.16638942 | 42.9878055  |
| 1679 | 1679 | 2 | 0 | 15.6972337  | 15.16638942 | 54.34377394 |
| 1680 | 1680 | 2 | 0 | 13.10136674 | 15.16638942 | 8.91847515  |
| 1681 | 1681 | 2 | 0 | 16.10803064 | 15.16638942 | 20.2751561  |
| 1682 | 1682 | 2 | 0 | 9.65617995  | 12.24995051 | 41.44593602 |
| 1683 | 1683 | 2 | 0 | 12.66284384 | 12.24995051 | 52.80261697 |
| 1684 | 1684 | 2 | 0 | 10.06697689 | 12.24995051 | 7.37731819  |

|      |      |   |   |             |             |             |
|------|------|---|---|-------------|-------------|-------------|
| 1685 | 1685 | 2 | 0 | 13.07354647 | 12.24995051 | 18.73328663 |
| 1686 | 1686 | 2 | 0 | 16.08021037 | 12.24995051 | 30.08996758 |
| 1687 | 1687 | 2 | 0 | 11.98412356 | 15.47064617 | 39.82996561 |
| 1688 | 1688 | 2 | 0 | 14.99078745 | 15.47064617 | 51.18664656 |
| 1689 | 1689 | 2 | 0 | 12.3949205  | 15.47064616 | 5.76134777  |
| 1690 | 1690 | 2 | 0 | 15.40149008 | 15.47064616 | 17.11731622 |
| 1691 | 1691 | 2 | 0 | 18.40815398 | 15.47064617 | 28.47399717 |
| 1692 | 1692 | 2 | 0 | 10.47815105 | 11.69937951 | 49.23793445 |
| 1693 | 1693 | 2 | 0 | 10.88894798 | 11.69937951 | 15.16931661 |
| 1694 | 1694 | 2 | 0 | 13.89551757 | 11.69937951 | 26.52528505 |
| 1695 | 1695 | 2 | 0 | 16.90218146 | 11.69937951 | 37.881966   |
| 1696 | 1696 | 2 | 0 | 17.31288409 | 11.69937951 | 3.81263566  |
| 1697 | 1697 | 2 | 0 | 11.60256149 | 15.25193475 | 34.34222129 |
| 1698 | 1698 | 2 | 0 | 14.60922538 | 15.25193475 | 45.69890224 |
| 1699 | 1699 | 2 | 0 | 12.01335842 | 15.25193475 | 0.27360346  |
| 1700 | 1700 | 2 | 0 | 15.01992801 | 15.25193475 | 11.6295719  |
| 1701 | 1701 | 2 | 0 | 18.0265919  | 15.25193475 | 22.98625285 |
| 1702 | 1702 | 2 | 0 | 9.65674579  | 11.94764863 | 46.21262123 |
| 1703 | 1703 | 2 | 0 | 10.06744842 | 11.94764863 | 12.1440034  |
| 1704 | 1704 | 2 | 0 | 13.07411231 | 11.94764863 | 23.49997184 |
| 1705 | 1705 | 2 | 0 | 16.0806819  | 11.94764863 | 34.85665279 |
| 1706 | 1706 | 2 | 0 | 16.49147883 | 11.94764863 | 0.78732245  |
| 1707 | 1707 | 2 | 0 | 12.23394016 | 9.774375    | 29.18579366 |
| 1708 | 1708 | 2 | 0 | 15.24060405 | 9.774375    | 40.54247461 |
| 1709 | 1709 | 2 | 0 | 18.24717363 | 9.774375    | 51.89844305 |
| 1710 | 1710 | 2 | 0 | 15.65130668 | 9.774375    | 6.47314427  |
| 1711 | 1711 | 2 | 0 | 18.65797057 | 9.774375    | 17.82982522 |
| 1712 | 1712 | 2 | 0 | 10.47805674 | 9.774375    | 55.06055799 |
| 1713 | 1713 | 2 | 0 | 10.88875937 | 9.774375    | 20.99194016 |
| 1714 | 1714 | 2 | 0 | 13.89542326 | 9.774375    | 32.3479086  |
| 1715 | 1715 | 2 | 0 | 16.90199285 | 9.774375    | 43.70458955 |
| 1716 | 1716 | 2 | 0 | 17.31278979 | 9.774375    | 9.63525921  |
| 1717 | 1717 | 2 | 0 | 9.68400022  | 20.02136058 | 31.63112455 |
| 1718 | 1718 | 2 | 0 | 12.69066411 | 20.02136058 | 42.9878055  |
| 1719 | 1719 | 2 | 0 | 15.6972337  | 20.02136058 | 54.34377394 |
| 1720 | 1720 | 2 | 0 | 13.10136674 | 20.02136058 | 8.91847515  |
| 1721 | 1721 | 2 | 0 | 16.10803064 | 20.02136058 | 20.2751561  |
| 1722 | 1722 | 2 | 0 | 9.65617995  | 22.9377995  | 41.44593602 |
| 1723 | 1723 | 2 | 0 | 12.66284384 | 22.9377995  | 52.80261697 |
| 1724 | 1724 | 2 | 0 | 10.06697689 | 22.93779949 | 7.37731819  |
| 1725 | 1725 | 2 | 0 | 13.07354647 | 22.93779949 | 18.73328663 |
| 1726 | 1726 | 2 | 0 | 16.08021037 | 22.93779949 | 30.08996758 |
| 1727 | 1727 | 2 | 0 | 11.98412356 | 19.71710384 | 39.82996561 |
| 1728 | 1728 | 2 | 0 | 14.99078745 | 19.71710384 | 51.18664656 |
| 1729 | 1729 | 2 | 0 | 12.3949205  | 19.71710383 | 5.76134777  |
| 1730 | 1730 | 2 | 0 | 15.40149008 | 19.71710384 | 17.11731622 |
| 1731 | 1731 | 2 | 0 | 18.40815398 | 19.71710384 | 28.47399717 |
| 1732 | 1732 | 2 | 0 | 10.47815105 | 15.66887049 | 49.23793445 |
| 1733 | 1733 | 2 | 0 | 10.88894798 | 15.66887049 | 15.16931661 |
| 1734 | 1734 | 2 | 0 | 13.89551757 | 15.66887049 | 26.52528505 |
| 1735 | 1735 | 2 | 0 | 16.90218146 | 15.66887049 | 37.881966   |

|      |      |   |   |             |                      |             |
|------|------|---|---|-------------|----------------------|-------------|
| 1736 | 1736 | 2 | 0 | 17.31288409 | 15.66887049          | 3.81263566  |
| 1737 | 1737 | 2 | 0 | 11.60256149 | 19.93581525          | 34.34222129 |
| 1738 | 1738 | 2 | 0 | 14.60922538 | 19.93581525          | 45.69890224 |
| 1739 | 1739 | 2 | 0 | 12.01335842 | 19.93581525          | 0.27360346  |
| 1740 | 1740 | 2 | 0 | 15.01992801 | 19.93581525          | 11.6295719  |
| 1741 | 1741 | 2 | 0 | 18.0265919  | 19.93581525          | 22.98625285 |
| 1742 | 1742 | 2 | 0 | 9.65674579  | 23.24010136          | 46.21262123 |
| 1743 | 1743 | 2 | 0 | 10.06744842 | 23.24010136          | 12.1440034  |
| 1744 | 1744 | 2 | 0 | 13.07411231 | 23.24010136          | 23.49997184 |
| 1745 | 1745 | 2 | 0 | 16.0806819  | 23.24010136          | 34.85665279 |
| 1746 | 1746 | 2 | 0 | 16.49147883 | 23.24010136          | 0.78732245  |
| 1747 | 1747 | 2 | 0 | 9.68400022  | 22.98588942          | 31.63112455 |
| 1748 | 1748 | 2 | 0 | 12.69066411 | 22.98588942          | 42.9878055  |
| 1749 | 1749 | 2 | 0 | 15.6972337  | 22.98588942          | 54.34377394 |
| 1750 | 1750 | 2 | 0 | 13.10136674 | 22.98588942          | 8.91847515  |
| 1751 | 1751 | 2 | 0 | 16.10803064 | 22.98588942          | 20.2751561  |
| 1752 | 1752 | 2 | 0 | 9.65617995  | 20.06945051          | 41.44593602 |
| 1753 | 1753 | 2 | 0 | 12.66284384 | 20.06945051          | 52.80261697 |
| 1754 | 1754 | 2 | 0 | 10.06697689 | 20.06945051          | 7.37731819  |
| 1755 | 1755 | 2 | 0 | 13.07354647 | 20.06945051          | 18.73328663 |
| 1756 | 1756 | 2 | 0 | 16.08021037 | 20.06945051          | 30.08996758 |
| 1757 | 1757 | 2 | 0 | 11.98412356 | 23.29014617          | 39.82996561 |
| 1758 | 1758 | 2 | 0 | 14.99078745 | 23.29014617          | 51.18664656 |
| 1759 | 1759 | 2 | 0 | 12.3949205  | 23.29014616          | 5.76134777  |
| 1760 | 1760 | 2 | 0 | 15.40149008 | 23.29014616          | 17.11731622 |
| 1761 | 1761 | 2 | 0 | 18.40815398 | 23.29014617          | 28.47399717 |
| 1762 | 1762 | 2 | 0 | 10.47815105 | 19.51887951          | 49.23793445 |
| 1763 | 1763 | 2 | 0 | 10.88894798 | 19.51887951          | 15.16931661 |
| 1764 | 1764 | 2 | 0 | 13.89551757 | 19.51887951          | 26.52528505 |
| 1765 | 1765 | 2 | 0 | 16.90218146 | 19.51887951          | 37.881966   |
| 1766 | 1766 | 2 | 0 | 17.31288409 | 19.51887951          | 3.81263566  |
| 1767 | 1767 | 2 | 0 | 11.60256149 | 23.07143475          | 34.34222129 |
| 1768 | 1768 | 2 | 0 | 14.60922538 | 23.07143475          | 45.69890224 |
| 1769 | 1769 | 2 | 0 | 12.01335842 | 23.07143475          | 0.27360346  |
| 1770 | 1770 | 2 | 0 | 15.01992801 | 23.07143475          | 11.6295719  |
| 1771 | 1771 | 2 | 0 | 18.0265919  | 23.07143475          | 22.98625285 |
| 1772 | 1772 | 2 | 0 | 9.65674579  | 19.76714863          | 46.21262123 |
| 1773 | 1773 | 2 | 0 | 10.06744842 | 19.76714863          | 12.1440034  |
| 1774 | 1774 | 2 | 0 | 13.07411231 | 19.76714863          | 23.49997184 |
| 1775 | 1775 | 2 | 0 | 16.0806819  | 19.76714863          | 34.85665279 |
| 1776 | 1776 | 2 | 0 | 16.49147883 | 19.76714863          | 0.78732245  |
| 1777 | 1777 | 2 | 0 | 12.23394016 | 17.59387529.18579366 |             |
| 1778 | 1778 | 2 | 0 | 15.24060405 | 17.59387540.54247461 |             |
| 1779 | 1779 | 2 | 0 | 18.24717363 | 17.59387551.89844305 |             |
| 1780 | 1780 | 2 | 0 | 15.65130668 | 17.5938756.47314427  |             |
| 1781 | 1781 | 2 | 0 | 18.65797057 | 17.59387517.82982522 |             |
| 1782 | 1782 | 2 | 0 | 10.47805674 | 17.59387555.06055799 |             |
| 1783 | 1783 | 2 | 0 | 10.88875937 | 17.59387520.99194016 |             |
| 1784 | 1784 | 2 | 0 | 13.89542326 | 17.59387532.3479086  |             |
| 1785 | 1785 | 2 | 0 | 16.90199285 | 17.59387543.70458955 |             |
| 1786 | 1786 | 2 | 0 | 17.31278979 | 17.5938759.63525921  |             |

|      |      |   |   |             |             |             |
|------|------|---|---|-------------|-------------|-------------|
| 1787 | 1787 | 2 | 0 | 9.68400022  | 27.84086058 | 31.63112455 |
| 1788 | 1788 | 2 | 0 | 12.69066411 | 27.84086058 | 42.9878055  |
| 1789 | 1789 | 2 | 0 | 15.6972337  | 27.84086058 | 54.34377394 |
| 1790 | 1790 | 2 | 0 | 13.10136674 | 27.84086058 | 8.91847515  |
| 1791 | 1791 | 2 | 0 | 16.10803064 | 27.84086058 | 20.2751561  |
| 1792 | 1792 | 2 | 0 | 9.65617995  | 30.7572995  | 41.44593602 |
| 1793 | 1793 | 2 | 0 | 12.66284384 | 30.7572995  | 52.80261697 |
| 1794 | 1794 | 2 | 0 | 10.06697689 | 30.75729949 | 7.37731819  |
| 1795 | 1795 | 2 | 0 | 13.07354647 | 30.75729949 | 18.73328663 |
| 1796 | 1796 | 2 | 0 | 16.08021037 | 30.75729949 | 30.08996758 |
| 1797 | 1797 | 2 | 0 | 11.98412356 | 27.53660384 | 39.82996561 |
| 1798 | 1798 | 2 | 0 | 14.99078745 | 27.53660384 | 51.18664656 |
| 1799 | 1799 | 2 | 0 | 12.3949205  | 27.53660383 | 5.76134777  |
| 1800 | 1800 | 2 | 0 | 15.40149008 | 27.53660384 | 17.11731622 |
| 1801 | 1801 | 2 | 0 | 18.40815398 | 27.53660384 | 28.47399717 |
| 1802 | 1802 | 2 | 0 | 10.47815105 | 23.48837049 | 49.23793445 |
| 1803 | 1803 | 2 | 0 | 10.88894798 | 23.48837049 | 15.16931661 |
| 1804 | 1804 | 2 | 0 | 13.89551757 | 23.48837049 | 26.52528505 |
| 1805 | 1805 | 2 | 0 | 16.90218146 | 23.48837049 | 37.881966   |
| 1806 | 1806 | 2 | 0 | 17.31288409 | 23.48837049 | 3.81263566  |
| 1807 | 1807 | 2 | 0 | 11.60256149 | 27.75531525 | 34.34222129 |
| 1808 | 1808 | 2 | 0 | 14.60922538 | 27.75531525 | 45.69890224 |
| 1809 | 1809 | 2 | 0 | 12.01335842 | 27.75531525 | 0.27360346  |
| 1810 | 1810 | 2 | 0 | 15.01992801 | 27.75531525 | 11.6295719  |
| 1811 | 1811 | 2 | 0 | 18.0265919  | 27.75531525 | 22.98625285 |
| 1812 | 1812 | 2 | 0 | 9.65674579  | 31.05960136 | 46.21262123 |
| 1813 | 1813 | 2 | 0 | 10.06744842 | 31.05960136 | 12.1440034  |
| 1814 | 1814 | 2 | 0 | 13.07411231 | 31.05960136 | 23.49997184 |
| 1815 | 1815 | 2 | 0 | 16.0806819  | 31.05960136 | 34.85665279 |
| 1816 | 1816 | 2 | 0 | 16.49147883 | 31.05960136 | 0.78732245  |
| 1817 | 1817 | 2 | 0 | 9.68400022  | 30.80538942 | 31.63112455 |
| 1818 | 1818 | 2 | 0 | 12.69066411 | 30.80538942 | 42.9878055  |
| 1819 | 1819 | 2 | 0 | 15.6972337  | 30.80538942 | 54.34377394 |
| 1820 | 1820 | 2 | 0 | 13.10136674 | 30.80538942 | 8.91847515  |
| 1821 | 1821 | 2 | 0 | 16.10803064 | 30.80538942 | 20.2751561  |
| 1822 | 1822 | 2 | 0 | 9.65617995  | 27.88895051 | 41.44593602 |
| 1823 | 1823 | 2 | 0 | 12.66284384 | 27.88895051 | 52.80261697 |
| 1824 | 1824 | 2 | 0 | 10.06697689 | 27.88895051 | 7.37731819  |
| 1825 | 1825 | 2 | 0 | 13.07354647 | 27.88895051 | 18.73328663 |
| 1826 | 1826 | 2 | 0 | 16.08021037 | 27.88895051 | 30.08996758 |
| 1827 | 1827 | 2 | 0 | 11.98412356 | 31.10964617 | 39.82996561 |
| 1828 | 1828 | 2 | 0 | 14.99078745 | 31.10964617 | 51.18664656 |
| 1829 | 1829 | 2 | 0 | 12.3949205  | 31.10964616 | 5.76134777  |
| 1830 | 1830 | 2 | 0 | 15.40149008 | 31.10964616 | 17.11731622 |
| 1831 | 1831 | 2 | 0 | 18.40815398 | 31.10964617 | 28.47399717 |
| 1832 | 1832 | 2 | 0 | 10.47815105 | 27.33837951 | 49.23793445 |
| 1833 | 1833 | 2 | 0 | 10.88894798 | 27.33837951 | 15.16931661 |
| 1834 | 1834 | 2 | 0 | 13.89551757 | 27.33837951 | 26.52528505 |
| 1835 | 1835 | 2 | 0 | 16.90218146 | 27.33837951 | 37.881966   |
| 1836 | 1836 | 2 | 0 | 17.31288409 | 27.33837951 | 3.81263566  |
| 1837 | 1837 | 2 | 0 | 11.60256149 | 30.89093475 | 34.34222129 |

|      |      |   |   |             |                      |             |
|------|------|---|---|-------------|----------------------|-------------|
| 1838 | 1838 | 2 | 0 | 14.60922538 | 30.89093475          | 45.69890224 |
| 1839 | 1839 | 2 | 0 | 12.01335842 | 30.89093475          | 0.27360346  |
| 1840 | 1840 | 2 | 0 | 15.01992801 | 30.89093475          | 11.6295719  |
| 1841 | 1841 | 2 | 0 | 18.0265919  | 30.89093475          | 22.98625285 |
| 1842 | 1842 | 2 | 0 | 9.65674579  | 27.58664863          | 46.21262123 |
| 1843 | 1843 | 2 | 0 | 10.06744842 | 27.58664863          | 12.1440034  |
| 1844 | 1844 | 2 | 0 | 13.07411231 | 27.58664863          | 23.49997184 |
| 1845 | 1845 | 2 | 0 | 16.0806819  | 27.58664863          | 34.85665279 |
| 1846 | 1846 | 2 | 0 | 16.49147883 | 27.58664863          | 0.78732245  |
| 1847 | 1847 | 2 | 0 | 12.23394016 | 25.41337529.18579366 |             |
| 1848 | 1848 | 2 | 0 | 15.24060405 | 25.41337540.54247461 |             |
| 1849 | 1849 | 2 | 0 | 18.24717363 | 25.41337551.89844305 |             |
| 1850 | 1850 | 2 | 0 | 15.65130668 | 25.4133756.47314427  |             |
| 1851 | 1851 | 2 | 0 | 18.65797057 | 25.41337517.82982522 |             |
| 1852 | 1852 | 2 | 0 | 10.47805674 | 25.41337555.06055799 |             |
| 1853 | 1853 | 2 | 0 | 10.88875937 | 25.41337520.99194016 |             |
| 1854 | 1854 | 2 | 0 | 13.89542326 | 25.41337532.3479086  |             |
| 1855 | 1855 | 2 | 0 | 16.90199285 | 25.41337543.70458955 |             |
| 1856 | 1856 | 2 | 0 | 17.31278979 | 25.4133759.63525921  |             |
| 1857 | 1857 | 2 | 0 | 19.11460022 | 4.38236058           | 31.63112455 |
| 1858 | 1858 | 2 | 0 | 22.12126411 | 4.38236058           | 42.9878055  |
| 1859 | 1859 | 2 | 0 | 25.1278337  | 4.38236058           | 54.34377394 |
| 1860 | 1860 | 2 | 0 | 22.53196674 | 4.38236058           | 8.91847515  |
| 1861 | 1861 | 2 | 0 | 25.53863064 | 4.38236058           | 20.2751561  |
| 1862 | 1862 | 2 | 0 | 19.08677995 | 7.298799541.44593602 |             |
| 1863 | 1863 | 2 | 0 | 22.09344384 | 7.298799552.80261697 |             |
| 1864 | 1864 | 2 | 0 | 19.49757689 | 7.29879949           | 7.37731819  |
| 1865 | 1865 | 2 | 0 | 22.50414647 | 7.29879949           | 18.73328663 |
| 1866 | 1866 | 2 | 0 | 25.51081037 | 7.29879949           | 30.08996758 |
| 1867 | 1867 | 2 | 0 | 21.41472356 | 4.07810384           | 39.82996561 |
| 1868 | 1868 | 2 | 0 | 24.42138745 | 4.07810384           | 51.18664656 |
| 1869 | 1869 | 2 | 0 | 21.8255205  | 4.07810383           | 5.76134777  |
| 1870 | 1870 | 2 | 0 | 24.83209008 | 4.07810384           | 17.11731622 |
| 1871 | 1871 | 2 | 0 | 27.83875398 | 4.07810384           | 28.47399717 |
| 1872 | 1872 | 2 | 0 | 19.90875105 | 0.02987049           | 49.23793445 |
| 1873 | 1873 | 2 | 0 | 20.31954798 | 0.02987049           | 15.16931661 |
| 1874 | 1874 | 2 | 0 | 23.32611757 | 0.02987049           | 26.52528505 |
| 1875 | 1875 | 2 | 0 | 26.33278146 | 0.02987049           | 37.881966   |
| 1876 | 1876 | 2 | 0 | 26.74348409 | 0.02987049           | 3.81263566  |
| 1877 | 1877 | 2 | 0 | 21.03316149 | 4.29681525           | 34.34222129 |
| 1878 | 1878 | 2 | 0 | 24.03982538 | 4.29681525           | 45.69890224 |
| 1879 | 1879 | 2 | 0 | 21.44395842 | 4.29681525           | 0.27360346  |
| 1880 | 1880 | 2 | 0 | 24.45052801 | 4.29681525           | 11.6295719  |
| 1881 | 1881 | 2 | 0 | 27.4571919  | 4.29681525           | 22.98625285 |
| 1882 | 1882 | 2 | 0 | 19.08734579 | 7.60110136           | 46.21262123 |
| 1883 | 1883 | 2 | 0 | 19.49804842 | 7.60110136           | 12.1440034  |
| 1884 | 1884 | 2 | 0 | 22.50471231 | 7.60110136           | 23.49997184 |
| 1885 | 1885 | 2 | 0 | 25.5112819  | 7.60110136           | 34.85665279 |
| 1886 | 1886 | 2 | 0 | 25.92207883 | 7.60110136           | 0.78732245  |
| 1887 | 1887 | 2 | 0 | 19.11460022 | 7.34688942           | 31.63112455 |
| 1888 | 1888 | 2 | 0 | 22.12126411 | 7.34688942           | 42.9878055  |

|      |      |   |   |             |             |             |
|------|------|---|---|-------------|-------------|-------------|
| 1889 | 1889 | 2 | 0 | 25.1278337  | 7.34688942  | 54.34377394 |
| 1890 | 1890 | 2 | 0 | 22.53196674 | 7.34688942  | 8.91847515  |
| 1891 | 1891 | 2 | 0 | 25.53863064 | 7.34688942  | 20.2751561  |
| 1892 | 1892 | 2 | 0 | 19.08677995 | 4.43045051  | 41.44593602 |
| 1893 | 1893 | 2 | 0 | 22.09344384 | 4.43045051  | 52.80261697 |
| 1894 | 1894 | 2 | 0 | 19.49757689 | 4.43045051  | 7.37731819  |
| 1895 | 1895 | 2 | 0 | 22.50414647 | 4.43045051  | 18.73328663 |
| 1896 | 1896 | 2 | 0 | 25.51081037 | 4.43045051  | 30.08996758 |
| 1897 | 1897 | 2 | 0 | 21.41472356 | 7.65114617  | 39.82996561 |
| 1898 | 1898 | 2 | 0 | 24.42138745 | 7.65114617  | 51.18664656 |
| 1899 | 1899 | 2 | 0 | 21.8255205  | 7.65114616  | 5.76134777  |
| 1900 | 1900 | 2 | 0 | 24.83209008 | 7.65114616  | 17.11731622 |
| 1901 | 1901 | 2 | 0 | 27.83875398 | 7.65114617  | 28.47399717 |
| 1902 | 1902 | 2 | 0 | 19.90875105 | 3.87987951  | 49.23793445 |
| 1903 | 1903 | 2 | 0 | 20.31954798 | 3.87987951  | 15.16931661 |
| 1904 | 1904 | 2 | 0 | 23.32611757 | 3.87987951  | 26.52528505 |
| 1905 | 1905 | 2 | 0 | 26.33278146 | 3.87987951  | 37.881966   |
| 1906 | 1906 | 2 | 0 | 26.74348409 | 3.87987951  | 3.81263566  |
| 1907 | 1907 | 2 | 0 | 21.03316149 | 7.43243475  | 34.34222129 |
| 1908 | 1908 | 2 | 0 | 24.03982538 | 7.43243475  | 45.69890224 |
| 1909 | 1909 | 2 | 0 | 21.44395842 | 7.43243475  | 0.27360346  |
| 1910 | 1910 | 2 | 0 | 24.45052801 | 7.43243475  | 11.6295719  |
| 1911 | 1911 | 2 | 0 | 27.4571919  | 7.43243475  | 22.98625285 |
| 1912 | 1912 | 2 | 0 | 19.08734579 | 4.12814863  | 46.21262123 |
| 1913 | 1913 | 2 | 0 | 19.49804842 | 4.12814863  | 12.1440034  |
| 1914 | 1914 | 2 | 0 | 22.50471231 | 4.12814863  | 23.49997184 |
| 1915 | 1915 | 2 | 0 | 25.5112819  | 4.12814863  | 34.85665279 |
| 1916 | 1916 | 2 | 0 | 25.92207883 | 4.12814863  | 0.78732245  |
| 1917 | 1917 | 2 | 0 | 21.66454016 | 1.954875    | 29.18579366 |
| 1918 | 1918 | 2 | 0 | 24.67120405 | 1.954875    | 40.54247461 |
| 1919 | 1919 | 2 | 0 | 27.67777363 | 1.954875    | 51.89844305 |
| 1920 | 1920 | 2 | 0 | 25.08190668 | 1.954875    | 6.47314427  |
| 1921 | 1921 | 2 | 0 | 28.08857057 | 1.954875    | 17.82982522 |
| 1922 | 1922 | 2 | 0 | 19.90865674 | 1.954875    | 55.06055799 |
| 1923 | 1923 | 2 | 0 | 20.31935937 | 1.954875    | 20.99194016 |
| 1924 | 1924 | 2 | 0 | 23.32602326 | 1.954875    | 32.3479086  |
| 1925 | 1925 | 2 | 0 | 26.33259285 | 1.954875    | 43.70458955 |
| 1926 | 1926 | 2 | 0 | 26.74338979 | 1.954875    | 9.63525921  |
| 1927 | 1927 | 2 | 0 | 19.11460022 | 12.20186058 | 31.63112455 |
| 1928 | 1928 | 2 | 0 | 22.12126411 | 12.20186058 | 42.9878055  |
| 1929 | 1929 | 2 | 0 | 25.1278337  | 12.20186058 | 54.34377394 |
| 1930 | 1930 | 2 | 0 | 22.53196674 | 12.20186058 | 8.91847515  |
| 1931 | 1931 | 2 | 0 | 25.53863064 | 12.20186058 | 20.2751561  |
| 1932 | 1932 | 2 | 0 | 19.08677995 | 15.1182995  | 41.44593602 |
| 1933 | 1933 | 2 | 0 | 22.09344384 | 15.1182995  | 52.80261697 |
| 1934 | 1934 | 2 | 0 | 19.49757689 | 15.11829949 | 7.37731819  |
| 1935 | 1935 | 2 | 0 | 22.50414647 | 15.11829949 | 18.73328663 |
| 1936 | 1936 | 2 | 0 | 25.51081037 | 15.11829949 | 30.08996758 |
| 1937 | 1937 | 2 | 0 | 21.41472356 | 11.89760384 | 39.82996561 |
| 1938 | 1938 | 2 | 0 | 24.42138745 | 11.89760384 | 51.18664656 |
| 1939 | 1939 | 2 | 0 | 21.8255205  | 11.89760383 | 5.76134777  |

|      |      |   |   |             |             |             |
|------|------|---|---|-------------|-------------|-------------|
| 1940 | 1940 | 2 | 0 | 24.83209008 | 11.89760384 | 17.11731622 |
| 1941 | 1941 | 2 | 0 | 27.83875398 | 11.89760384 | 28.47399717 |
| 1942 | 1942 | 2 | 0 | 19.90875105 | 7.84937049  | 49.23793445 |
| 1943 | 1943 | 2 | 0 | 20.31954798 | 7.84937049  | 15.16931661 |
| 1944 | 1944 | 2 | 0 | 23.32611757 | 7.84937049  | 26.52528505 |
| 1945 | 1945 | 2 | 0 | 26.33278146 | 7.84937049  | 37.881966   |
| 1946 | 1946 | 2 | 0 | 26.74348409 | 7.84937049  | 3.81263566  |
| 1947 | 1947 | 2 | 0 | 21.03316149 | 12.11631525 | 34.34222129 |
| 1948 | 1948 | 2 | 0 | 24.03982538 | 12.11631525 | 45.69890224 |
| 1949 | 1949 | 2 | 0 | 21.44395842 | 12.11631525 | 0.27360346  |
| 1950 | 1950 | 2 | 0 | 24.45052801 | 12.11631525 | 11.6295719  |
| 1951 | 1951 | 2 | 0 | 27.4571919  | 12.11631525 | 22.98625285 |
| 1952 | 1952 | 2 | 0 | 19.08734579 | 15.42060136 | 46.21262123 |
| 1953 | 1953 | 2 | 0 | 19.49804842 | 15.42060136 | 12.1440034  |
| 1954 | 1954 | 2 | 0 | 22.50471231 | 15.42060136 | 23.49997184 |
| 1955 | 1955 | 2 | 0 | 25.5112819  | 15.42060136 | 34.85665279 |
| 1956 | 1956 | 2 | 0 | 25.92207883 | 15.42060136 | 0.78732245  |
| 1957 | 1957 | 2 | 0 | 19.11460022 | 15.16638942 | 31.63112455 |
| 1958 | 1958 | 2 | 0 | 22.12126411 | 15.16638942 | 42.9878055  |
| 1959 | 1959 | 2 | 0 | 25.1278337  | 15.16638942 | 54.34377394 |
| 1960 | 1960 | 2 | 0 | 22.53196674 | 15.16638942 | 8.91847515  |
| 1961 | 1961 | 2 | 0 | 25.53863064 | 15.16638942 | 20.2751561  |
| 1962 | 1962 | 2 | 0 | 19.08677995 | 12.24995051 | 41.44593602 |
| 1963 | 1963 | 2 | 0 | 22.09344384 | 12.24995051 | 52.80261697 |
| 1964 | 1964 | 2 | 0 | 19.49757689 | 12.24995051 | 7.37731819  |
| 1965 | 1965 | 2 | 0 | 22.50414647 | 12.24995051 | 18.73328663 |
| 1966 | 1966 | 2 | 0 | 25.51081037 | 12.24995051 | 30.08996758 |
| 1967 | 1967 | 2 | 0 | 21.41472356 | 15.47064617 | 39.82996561 |
| 1968 | 1968 | 2 | 0 | 24.42138745 | 15.47064617 | 51.18664656 |
| 1969 | 1969 | 2 | 0 | 21.8255205  | 15.47064616 | 5.76134777  |
| 1970 | 1970 | 2 | 0 | 24.83209008 | 15.47064616 | 17.11731622 |
| 1971 | 1971 | 2 | 0 | 27.83875398 | 15.47064617 | 28.47399717 |
| 1972 | 1972 | 2 | 0 | 19.90875105 | 11.69937951 | 49.23793445 |
| 1973 | 1973 | 2 | 0 | 20.31954798 | 11.69937951 | 15.16931661 |
| 1974 | 1974 | 2 | 0 | 23.32611757 | 11.69937951 | 26.52528505 |
| 1975 | 1975 | 2 | 0 | 26.33278146 | 11.69937951 | 37.881966   |
| 1976 | 1976 | 2 | 0 | 26.74348409 | 11.69937951 | 3.81263566  |
| 1977 | 1977 | 2 | 0 | 21.03316149 | 15.25193475 | 34.34222129 |
| 1978 | 1978 | 2 | 0 | 24.03982538 | 15.25193475 | 45.69890224 |
| 1979 | 1979 | 2 | 0 | 21.44395842 | 15.25193475 | 0.27360346  |
| 1980 | 1980 | 2 | 0 | 24.45052801 | 15.25193475 | 11.6295719  |
| 1981 | 1981 | 2 | 0 | 27.4571919  | 15.25193475 | 22.98625285 |
| 1982 | 1982 | 2 | 0 | 19.08734579 | 11.94764863 | 46.21262123 |
| 1983 | 1983 | 2 | 0 | 19.49804842 | 11.94764863 | 12.1440034  |
| 1984 | 1984 | 2 | 0 | 22.50471231 | 11.94764863 | 23.49997184 |
| 1985 | 1985 | 2 | 0 | 25.5112819  | 11.94764863 | 34.85665279 |
| 1986 | 1986 | 2 | 0 | 25.92207883 | 11.94764863 | 0.78732245  |
| 1987 | 1987 | 2 | 0 | 21.66454016 | 9.774375    | 29.18579366 |
| 1988 | 1988 | 2 | 0 | 24.67120405 | 9.774375    | 40.54247461 |
| 1989 | 1989 | 2 | 0 | 27.67777363 | 9.774375    | 51.89844305 |
| 1990 | 1990 | 2 | 0 | 25.08190668 | 9.774375    | 6.47314427  |



|      |      |   |   |             |             |             |
|------|------|---|---|-------------|-------------|-------------|
| 1991 | 1991 | 2 | 0 | 28.08857057 | 9.774375    | 17.82982522 |
| 1992 | 1992 | 2 | 0 | 19.90865674 | 9.774375    | 55.06055799 |
| 1993 | 1993 | 2 | 0 | 20.31935937 | 9.774375    | 20.99194016 |
| 1994 | 1994 | 2 | 0 | 23.32602326 | 9.774375    | 32.3479086  |
| 1995 | 1995 | 2 | 0 | 26.33259285 | 9.774375    | 43.70458955 |
| 1996 | 1996 | 2 | 0 | 26.74338979 | 9.774375    | 9.63525921  |
| 1997 | 1997 | 2 | 0 | 19.11460022 | 20.02136058 | 31.63112455 |
| 1998 | 1998 | 2 | 0 | 22.12126411 | 20.02136058 | 42.9878055  |
| 1999 | 1999 | 2 | 0 | 25.1278337  | 20.02136058 | 54.34377394 |
| 2000 | 2000 | 2 | 0 | 22.53196674 | 20.02136058 | 8.91847515  |
| 2001 | 2001 | 2 | 0 | 25.53863064 | 20.02136058 | 20.2751561  |
| 2002 | 2002 | 2 | 0 | 19.08677995 | 22.9377995  | 41.44593602 |
| 2003 | 2003 | 2 | 0 | 22.09344384 | 22.9377995  | 52.80261697 |
| 2004 | 2004 | 2 | 0 | 19.49757689 | 22.93779949 | 7.37731819  |
| 2005 | 2005 | 2 | 0 | 22.50414647 | 22.93779949 | 18.73328663 |
| 2006 | 2006 | 2 | 0 | 25.51081037 | 22.93779949 | 30.08996758 |
| 2007 | 2007 | 2 | 0 | 21.41472356 | 19.71710384 | 39.82996561 |
| 2008 | 2008 | 2 | 0 | 24.42138745 | 19.71710384 | 51.18664656 |
| 2009 | 2009 | 2 | 0 | 21.8255205  | 19.71710383 | 5.76134777  |
| 2010 | 2010 | 2 | 0 | 24.83209008 | 19.71710384 | 17.11731622 |
| 2011 | 2011 | 2 | 0 | 27.83875398 | 19.71710384 | 28.47399717 |
| 2012 | 2012 | 2 | 0 | 19.90875105 | 15.66887049 | 49.23793445 |
| 2013 | 2013 | 2 | 0 | 20.31954798 | 15.66887049 | 15.16931661 |
| 2014 | 2014 | 2 | 0 | 23.32611757 | 15.66887049 | 26.52528505 |
| 2015 | 2015 | 2 | 0 | 26.33278146 | 15.66887049 | 37.881966   |
| 2016 | 2016 | 2 | 0 | 26.74348409 | 15.66887049 | 3.81263566  |
| 2017 | 2017 | 2 | 0 | 21.03316149 | 19.93581525 | 34.34222129 |
| 2018 | 2018 | 2 | 0 | 24.03982538 | 19.93581525 | 45.69890224 |
| 2019 | 2019 | 2 | 0 | 21.44395842 | 19.93581525 | 0.27360346  |
| 2020 | 2020 | 2 | 0 | 24.45052801 | 19.93581525 | 11.6295719  |
| 2021 | 2021 | 2 | 0 | 27.4571919  | 19.93581525 | 22.98625285 |
| 2022 | 2022 | 2 | 0 | 19.08734579 | 23.24010136 | 46.21262123 |
| 2023 | 2023 | 2 | 0 | 19.49804842 | 23.24010136 | 12.1440034  |
| 2024 | 2024 | 2 | 0 | 22.50471231 | 23.24010136 | 23.49997184 |
| 2025 | 2025 | 2 | 0 | 25.5112819  | 23.24010136 | 34.85665279 |
| 2026 | 2026 | 2 | 0 | 25.92207883 | 23.24010136 | 0.78732245  |
| 2027 | 2027 | 2 | 0 | 19.11460022 | 22.98588942 | 31.63112455 |
| 2028 | 2028 | 2 | 0 | 22.12126411 | 22.98588942 | 42.9878055  |
| 2029 | 2029 | 2 | 0 | 25.1278337  | 22.98588942 | 54.34377394 |
| 2030 | 2030 | 2 | 0 | 22.53196674 | 22.98588942 | 8.91847515  |
| 2031 | 2031 | 2 | 0 | 25.53863064 | 22.98588942 | 20.2751561  |
| 2032 | 2032 | 2 | 0 | 19.08677995 | 20.06945051 | 41.44593602 |
| 2033 | 2033 | 2 | 0 | 22.09344384 | 20.06945051 | 52.80261697 |
| 2034 | 2034 | 2 | 0 | 19.49757689 | 20.06945051 | 7.37731819  |
| 2035 | 2035 | 2 | 0 | 22.50414647 | 20.06945051 | 18.73328663 |
| 2036 | 2036 | 2 | 0 | 25.51081037 | 20.06945051 | 30.08996758 |
| 2037 | 2037 | 2 | 0 | 21.41472356 | 23.29014617 | 39.82996561 |
| 2038 | 2038 | 2 | 0 | 24.42138745 | 23.29014617 | 51.18664656 |
| 2039 | 2039 | 2 | 0 | 21.8255205  | 23.29014616 | 5.76134777  |
| 2040 | 2040 | 2 | 0 | 24.83209008 | 23.29014616 | 17.11731622 |
| 2041 | 2041 | 2 | 0 | 27.83875398 | 23.29014617 | 28.47399717 |

|      |      |   |   |             |                      |             |
|------|------|---|---|-------------|----------------------|-------------|
| 2042 | 2042 | 2 | 0 | 19.90875105 | 19.51887951          | 49.23793445 |
| 2043 | 2043 | 2 | 0 | 20.31954798 | 19.51887951          | 15.16931661 |
| 2044 | 2044 | 2 | 0 | 23.32611757 | 19.51887951          | 26.52528505 |
| 2045 | 2045 | 2 | 0 | 26.33278146 | 19.51887951          | 37.881966   |
| 2046 | 2046 | 2 | 0 | 26.74348409 | 19.51887951          | 3.81263566  |
| 2047 | 2047 | 2 | 0 | 21.03316149 | 23.07143475          | 34.34222129 |
| 2048 | 2048 | 2 | 0 | 24.03982538 | 23.07143475          | 45.69890224 |
| 2049 | 2049 | 2 | 0 | 21.44395842 | 23.07143475          | 0.27360346  |
| 2050 | 2050 | 2 | 0 | 24.45052801 | 23.07143475          | 11.6295719  |
| 2051 | 2051 | 2 | 0 | 27.4571919  | 23.07143475          | 22.98625285 |
| 2052 | 2052 | 2 | 0 | 19.08734579 | 19.76714863          | 46.21262123 |
| 2053 | 2053 | 2 | 0 | 19.49804842 | 19.76714863          | 12.1440034  |
| 2054 | 2054 | 2 | 0 | 22.50471231 | 19.76714863          | 23.49997184 |
| 2055 | 2055 | 2 | 0 | 25.5112819  | 19.76714863          | 34.85665279 |
| 2056 | 2056 | 2 | 0 | 25.92207883 | 19.76714863          | 0.78732245  |
| 2057 | 2057 | 2 | 0 | 21.66454016 | 17.59387529.18579366 |             |
| 2058 | 2058 | 2 | 0 | 24.67120405 | 17.59387540.54247461 |             |
| 2059 | 2059 | 2 | 0 | 27.67777363 | 17.59387551.89844305 |             |
| 2060 | 2060 | 2 | 0 | 25.08190668 | 17.5938756.47314427  |             |
| 2061 | 2061 | 2 | 0 | 28.08857057 | 17.59387517.82982522 |             |
| 2062 | 2062 | 2 | 0 | 19.90865674 | 17.59387555.06055799 |             |
| 2063 | 2063 | 2 | 0 | 20.31935937 | 17.59387520.99194016 |             |
| 2064 | 2064 | 2 | 0 | 23.32602326 | 17.59387532.3479086  |             |
| 2065 | 2065 | 2 | 0 | 26.33259285 | 17.59387543.70458955 |             |
| 2066 | 2066 | 2 | 0 | 26.74338979 | 17.5938759.63525921  |             |
| 2067 | 2067 | 2 | 0 | 19.11460022 | 27.84086058          | 31.63112455 |
| 2068 | 2068 | 2 | 0 | 22.12126411 | 27.84086058          | 42.9878055  |
| 2069 | 2069 | 2 | 0 | 25.1278337  | 27.84086058          | 54.34377394 |
| 2070 | 2070 | 2 | 0 | 22.53196674 | 27.84086058          | 8.91847515  |
| 2071 | 2071 | 2 | 0 | 25.53863064 | 27.84086058          | 20.2751561  |
| 2072 | 2072 | 2 | 0 | 19.08677995 | 30.7572995           | 41.44593602 |
| 2073 | 2073 | 2 | 0 | 22.09344384 | 30.7572995           | 52.80261697 |
| 2074 | 2074 | 2 | 0 | 19.49757689 | 30.75729949          | 7.37731819  |
| 2075 | 2075 | 2 | 0 | 22.50414647 | 30.75729949          | 18.73328663 |
| 2076 | 2076 | 2 | 0 | 25.51081037 | 30.75729949          | 30.08996758 |
| 2077 | 2077 | 2 | 0 | 21.41472356 | 27.53660384          | 39.82996561 |
| 2078 | 2078 | 2 | 0 | 24.42138745 | 27.53660384          | 51.18664656 |
| 2079 | 2079 | 2 | 0 | 21.8255205  | 27.53660383          | 5.76134777  |
| 2080 | 2080 | 2 | 0 | 24.83209008 | 27.53660384          | 17.11731622 |
| 2081 | 2081 | 2 | 0 | 27.83875398 | 27.53660384          | 28.47399717 |
| 2082 | 2082 | 2 | 0 | 19.90875105 | 23.48837049          | 49.23793445 |
| 2083 | 2083 | 2 | 0 | 20.31954798 | 23.48837049          | 15.16931661 |
| 2084 | 2084 | 2 | 0 | 23.32611757 | 23.48837049          | 26.52528505 |
| 2085 | 2085 | 2 | 0 | 26.33278146 | 23.48837049          | 37.881966   |
| 2086 | 2086 | 2 | 0 | 26.74348409 | 23.48837049          | 3.81263566  |
| 2087 | 2087 | 2 | 0 | 21.03316149 | 27.75531525          | 34.34222129 |
| 2088 | 2088 | 2 | 0 | 24.03982538 | 27.75531525          | 45.69890224 |
| 2089 | 2089 | 2 | 0 | 21.44395842 | 27.75531525          | 0.27360346  |
| 2090 | 2090 | 2 | 0 | 24.45052801 | 27.75531525          | 11.6295719  |
| 2091 | 2091 | 2 | 0 | 27.4571919  | 27.75531525          | 22.98625285 |
| 2092 | 2092 | 2 | 0 | 19.08734579 | 31.05960136          | 46.21262123 |

|      |      |   |   |             |                       |             |
|------|------|---|---|-------------|-----------------------|-------------|
| 2093 | 2093 | 2 | 0 | 19.49804842 | 31.05960136           | 12.1440034  |
| 2094 | 2094 | 2 | 0 | 22.50471231 | 31.05960136           | 23.49997184 |
| 2095 | 2095 | 2 | 0 | 25.5112819  | 31.05960136           | 34.85665279 |
| 2096 | 2096 | 2 | 0 | 25.92207883 | 31.05960136           | 0.78732245  |
| 2097 | 2097 | 2 | 0 | 19.11460022 | 30.80538942           | 31.63112455 |
| 2098 | 2098 | 2 | 0 | 22.12126411 | 30.80538942           | 42.9878055  |
| 2099 | 2099 | 2 | 0 | 25.1278337  | 30.80538942           | 54.34377394 |
| 2100 | 2100 | 2 | 0 | 22.53196674 | 30.80538942           | 8.91847515  |
| 2101 | 2101 | 2 | 0 | 25.53863064 | 30.80538942           | 20.2751561  |
| 2102 | 2102 | 2 | 0 | 19.08677995 | 27.88895051           | 41.44593602 |
| 2103 | 2103 | 2 | 0 | 22.09344384 | 27.88895051           | 52.80261697 |
| 2104 | 2104 | 2 | 0 | 19.49757689 | 27.88895051           | 7.37731819  |
| 2105 | 2105 | 2 | 0 | 22.50414647 | 27.88895051           | 18.73328663 |
| 2106 | 2106 | 2 | 0 | 25.51081037 | 27.88895051           | 30.08996758 |
| 2107 | 2107 | 2 | 0 | 21.41472356 | 31.10964617           | 39.82996561 |
| 2108 | 2108 | 2 | 0 | 24.42138745 | 31.10964617           | 51.18664656 |
| 2109 | 2109 | 2 | 0 | 21.8255205  | 31.10964616           | 5.76134777  |
| 2110 | 2110 | 2 | 0 | 24.83209008 | 31.10964616           | 17.11731622 |
| 2111 | 2111 | 2 | 0 | 27.83875398 | 31.10964617           | 28.47399717 |
| 2112 | 2112 | 2 | 0 | 19.90875105 | 27.33837951           | 49.23793445 |
| 2113 | 2113 | 2 | 0 | 20.31954798 | 27.33837951           | 15.16931661 |
| 2114 | 2114 | 2 | 0 | 23.32611757 | 27.33837951           | 26.52528505 |
| 2115 | 2115 | 2 | 0 | 26.33278146 | 27.33837951           | 37.881966   |
| 2116 | 2116 | 2 | 0 | 26.74348409 | 27.33837951           | 3.81263566  |
| 2117 | 2117 | 2 | 0 | 21.03316149 | 30.89093475           | 34.34222129 |
| 2118 | 2118 | 2 | 0 | 24.03982538 | 30.89093475           | 45.69890224 |
| 2119 | 2119 | 2 | 0 | 21.44395842 | 30.89093475           | 0.27360346  |
| 2120 | 2120 | 2 | 0 | 24.45052801 | 30.89093475           | 11.6295719  |
| 2121 | 2121 | 2 | 0 | 27.4571919  | 30.89093475           | 22.98625285 |
| 2122 | 2122 | 2 | 0 | 19.08734579 | 27.58664863           | 46.21262123 |
| 2123 | 2123 | 2 | 0 | 19.49804842 | 27.58664863           | 12.1440034  |
| 2124 | 2124 | 2 | 0 | 22.50471231 | 27.58664863           | 23.49997184 |
| 2125 | 2125 | 2 | 0 | 25.5112819  | 27.58664863           | 34.85665279 |
| 2126 | 2126 | 2 | 0 | 25.92207883 | 27.58664863           | 0.78732245  |
| 2127 | 2127 | 2 | 0 | 21.66454016 | 25.413375 29.18579366 |             |
| 2128 | 2128 | 2 | 0 | 24.67120405 | 25.413375 40.54247461 |             |
| 2129 | 2129 | 2 | 0 | 27.67777363 | 25.413375 51.89844305 |             |
| 2130 | 2130 | 2 | 0 | 25.08190668 | 25.413375 6.47314427  |             |
| 2131 | 2131 | 2 | 0 | 28.08857057 | 25.413375 17.82982522 |             |
| 2132 | 2132 | 2 | 0 | 19.90865674 | 25.413375 55.06055799 |             |
| 2133 | 2133 | 2 | 0 | 20.31935937 | 25.413375 20.99194016 |             |
| 2134 | 2134 | 2 | 0 | 23.32602326 | 25.413375 32.3479086  |             |
| 2135 | 2135 | 2 | 0 | 26.33259285 | 25.413375 43.70458955 |             |
| 2136 | 2136 | 2 | 0 | 26.74338979 | 25.413375 9.63525921  |             |
| 2137 | 2137 | 3 | 0 | 9.430601469 | 0.86883411            | 59.66669854 |
| 2138 | 2138 | 3 | 0 | 23.57650368 | 0.86883411            | 59.66669854 |
| 2139 | 2139 | 3 | 0 | 4.715300733 | 2.60650232            | 59.66669854 |
| 2140 | 2140 | 3 | 0 | 0           | 4.34417054            | 59.66669854 |
| 2141 | 2141 | 3 | 0 | 18.86120294 | 2.60650232            | 59.66669854 |
| 2142 | 2142 | 3 | 0 | 14.14590221 | 4.34417054            | 59.66669854 |
| 2143 | 2143 | 3 | 0 | 9.430601469 | 6.081838745           | 59.66669854 |

|      |      |   |   |             |             |             |
|------|------|---|---|-------------|-------------|-------------|
| 2144 | 2144 | 3 | 0 | 23.57650368 | 6.081838745 | 59.66669854 |
| 2145 | 2145 | 3 | 0 | 4.715300733 | 7.819506962 | 59.66669854 |
| 2146 | 2146 | 3 | 0 | 0           | 9.557175178 | 59.66669854 |
| 2147 | 2147 | 3 | 0 | 18.86120294 | 7.819506962 | 59.66669854 |
| 2148 | 2148 | 3 | 0 | 14.14590221 | 9.557175178 | 59.66669854 |
| 2149 | 2149 | 3 | 0 | 9.430601469 | 11.29484338 | 59.66669854 |
| 2150 | 2150 | 3 | 0 | 23.57650368 | 11.29484338 | 59.66669854 |
| 2151 | 2151 | 3 | 0 | 4.715300733 | 13.0325116  | 59.66669854 |
| 2152 | 2152 | 3 | 0 | 0           | 14.77017982 | 59.66669854 |
| 2153 | 2153 | 3 | 0 | 18.86120294 | 13.0325116  | 59.66669854 |
| 2154 | 2154 | 3 | 0 | 14.14590221 | 14.77017982 | 59.66669854 |
| 2155 | 2155 | 3 | 0 | 9.430601469 | 16.50784802 | 59.66669854 |
| 2156 | 2156 | 3 | 0 | 23.57650368 | 16.50784802 | 59.66669854 |
| 2157 | 2157 | 3 | 0 | 4.715300733 | 18.24551624 | 59.66669854 |
| 2158 | 2158 | 3 | 0 | 0           | 19.98318446 | 59.66669854 |
| 2159 | 2159 | 3 | 0 | 18.86120294 | 18.24551624 | 59.66669854 |
| 2160 | 2160 | 3 | 0 | 14.14590221 | 19.98318446 | 59.66669854 |
| 2161 | 2161 | 3 | 0 | 9.430601469 | 21.72085266 | 59.66669854 |
| 2162 | 2162 | 3 | 0 | 23.57650368 | 21.72085266 | 59.66669854 |
| 2163 | 2163 | 3 | 0 | 4.715300733 | 23.45852088 | 59.66669854 |
| 2164 | 2164 | 3 | 0 | 0           | 25.19618909 | 59.66669854 |
| 2165 | 2165 | 3 | 0 | 18.86120294 | 23.45852088 | 59.66669854 |
| 2166 | 2166 | 3 | 0 | 14.14590221 | 25.19618909 | 59.66669854 |
| 2167 | 2167 | 3 | 0 | 9.430601469 | 26.9338573  | 59.66669854 |
| 2168 | 2168 | 3 | 0 | 23.57650368 | 26.9338573  | 59.66669854 |
| 2169 | 2169 | 3 | 0 | 4.715300733 | 28.67152552 | 59.66669854 |
| 2170 | 2170 | 3 | 0 | 0           | 30.40919373 | 59.66669854 |
| 2171 | 2171 | 3 | 0 | 18.86120294 | 28.67152552 | 59.66669854 |
| 2172 | 2172 | 3 | 0 | 14.14590221 | 30.40919373 | 59.66669854 |
| 2173 | 2173 | 3 | 0 | 4.715300733 | 0           | 61.08339708 |
| 2174 | 2174 | 3 | 0 | 0           | 1.73766822  | 61.08339708 |
| 2175 | 2175 | 3 | 0 | 18.86120294 | 0           | 61.08339708 |
| 2176 | 2176 | 3 | 0 | 14.14590221 | 1.73766822  | 61.08339708 |
| 2177 | 2177 | 3 | 0 | 9.430601469 | 3.475336426 | 61.08339708 |
| 2178 | 2178 | 3 | 0 | 23.57650368 | 3.475336426 | 61.08339708 |
| 2179 | 2179 | 3 | 0 | 4.715300733 | 5.213004642 | 61.08339708 |
| 2180 | 2180 | 3 | 0 | 0           | 6.950672859 | 61.08339708 |
| 2181 | 2181 | 3 | 0 | 18.86120294 | 5.213004642 | 61.08339708 |
| 2182 | 2182 | 3 | 0 | 14.14590221 | 6.950672859 | 61.08339708 |
| 2183 | 2183 | 3 | 0 | 9.430601469 | 8.688341064 | 61.08339708 |
| 2184 | 2184 | 3 | 0 | 23.57650368 | 8.688341064 | 61.08339708 |
| 2185 | 2185 | 3 | 0 | 4.715300733 | 10.42600928 | 61.08339708 |
| 2186 | 2186 | 3 | 0 | 0           | 12.1636775  | 61.08339708 |
| 2187 | 2187 | 3 | 0 | 18.86120294 | 10.42600928 | 61.08339708 |
| 2188 | 2188 | 3 | 0 | 14.14590221 | 12.1636775  | 61.08339708 |
| 2189 | 2189 | 3 | 0 | 9.430601469 | 13.9013457  | 61.08339708 |
| 2190 | 2190 | 3 | 0 | 23.57650368 | 13.9013457  | 61.08339708 |
| 2191 | 2191 | 3 | 0 | 4.715300733 | 15.63901392 | 61.08339708 |
| 2192 | 2192 | 3 | 0 | 0           | 17.37668214 | 61.08339708 |
| 2193 | 2193 | 3 | 0 | 18.86120294 | 15.63901392 | 61.08339708 |
| 2194 | 2194 | 3 | 0 | 14.14590221 | 17.37668214 | 61.08339708 |

|      |      |   |   |             |             |             |
|------|------|---|---|-------------|-------------|-------------|
| 2195 | 2195 | 3 | 0 | 9.430601469 | 19.11435034 | 61.08339708 |
| 2196 | 2196 | 3 | 0 | 23.57650368 | 19.11435034 | 61.08339708 |
| 2197 | 2197 | 3 | 0 | 4.715300733 | 20.85201856 | 61.08339708 |
| 2198 | 2198 | 3 | 0 | 0           | 22.58968677 | 61.08339708 |
| 2199 | 2199 | 3 | 0 | 18.86120294 | 20.85201856 | 61.08339708 |
| 2200 | 2200 | 3 | 0 | 14.14590221 | 22.58968677 | 61.08339708 |
| 2201 | 2201 | 3 | 0 | 9.430601469 | 24.32735498 | 61.08339708 |
| 2202 | 2202 | 3 | 0 | 23.57650368 | 24.32735498 | 61.08339708 |
| 2203 | 2203 | 3 | 0 | 4.715300733 | 26.0650232  | 61.08339708 |
| 2204 | 2204 | 3 | 0 | 0           | 27.80269141 | 61.08339708 |
| 2205 | 2205 | 3 | 0 | 18.86120294 | 26.0650232  | 61.08339708 |
| 2206 | 2206 | 3 | 0 | 14.14590221 | 27.80269141 | 61.08339708 |
| 2207 | 2207 | 3 | 0 | 9.430601469 | 29.54035962 | 61.08339708 |
| 2208 | 2208 | 3 | 0 | 23.57650368 | 29.54035962 | 61.08339708 |
| 2209 | 2209 | 3 | 0 | 9.430601469 | 0.86883411  | 62.50009562 |
| 2210 | 2210 | 3 | 0 | 23.57650368 | 0.86883411  | 62.50009562 |
| 2211 | 2211 | 3 | 0 | 4.715300733 | 2.60650232  | 62.50009562 |
| 2212 | 2212 | 3 | 0 | 0           | 4.34417054  | 62.50009562 |
| 2213 | 2213 | 3 | 0 | 18.86120294 | 2.60650232  | 62.50009562 |
| 2214 | 2214 | 3 | 0 | 14.14590221 | 4.34417054  | 62.50009562 |
| 2215 | 2215 | 3 | 0 | 9.430601469 | 6.081838745 | 62.50009562 |
| 2216 | 2216 | 3 | 0 | 23.57650368 | 6.081838745 | 62.50009562 |
| 2217 | 2217 | 3 | 0 | 4.715300733 | 7.819506962 | 62.50009562 |
| 2218 | 2218 | 3 | 0 | 0           | 9.557175178 | 62.50009562 |
| 2219 | 2219 | 3 | 0 | 18.86120294 | 7.819506962 | 62.50009562 |
| 2220 | 2220 | 3 | 0 | 14.14590221 | 9.557175178 | 62.50009562 |
| 2221 | 2221 | 3 | 0 | 9.430601469 | 11.29484338 | 62.50009562 |
| 2222 | 2222 | 3 | 0 | 23.57650368 | 11.29484338 | 62.50009562 |
| 2223 | 2223 | 3 | 0 | 4.715300733 | 13.0325116  | 62.50009562 |
| 2224 | 2224 | 3 | 0 | 0           | 14.77017982 | 62.50009562 |
| 2225 | 2225 | 3 | 0 | 18.86120294 | 13.0325116  | 62.50009562 |
| 2226 | 2226 | 3 | 0 | 14.14590221 | 14.77017982 | 62.50009562 |
| 2227 | 2227 | 3 | 0 | 9.430601469 | 16.50784802 | 62.50009562 |
| 2228 | 2228 | 3 | 0 | 23.57650368 | 16.50784802 | 62.50009562 |
| 2229 | 2229 | 3 | 0 | 4.715300733 | 18.24551624 | 62.50009562 |
| 2230 | 2230 | 3 | 0 | 0           | 19.98318446 | 62.50009562 |
| 2231 | 2231 | 3 | 0 | 18.86120294 | 18.24551624 | 62.50009562 |
| 2232 | 2232 | 3 | 0 | 14.14590221 | 19.98318446 | 62.50009562 |
| 2233 | 2233 | 3 | 0 | 9.430601469 | 21.72085266 | 62.50009562 |
| 2234 | 2234 | 3 | 0 | 23.57650368 | 21.72085266 | 62.50009562 |
| 2235 | 2235 | 3 | 0 | 4.715300733 | 23.45852088 | 62.50009562 |
| 2236 | 2236 | 3 | 0 | 0           | 25.19618909 | 62.50009562 |
| 2237 | 2237 | 3 | 0 | 18.86120294 | 23.45852088 | 62.50009562 |
| 2238 | 2238 | 3 | 0 | 14.14590221 | 25.19618909 | 62.50009562 |
| 2239 | 2239 | 3 | 0 | 9.430601469 | 26.9338573  | 62.50009562 |
| 2240 | 2240 | 3 | 0 | 23.57650368 | 26.9338573  | 62.50009562 |
| 2241 | 2241 | 3 | 0 | 4.715300733 | 28.67152552 | 62.50009562 |
| 2242 | 2242 | 3 | 0 | 0           | 30.40919373 | 62.50009562 |
| 2243 | 2243 | 3 | 0 | 18.86120294 | 28.67152552 | 62.50009562 |
| 2244 | 2244 | 3 | 0 | 14.14590221 | 30.40919373 | 62.50009562 |
| 2245 | 2245 | 3 | 0 | 4.715300733 | 0           | 63.91679416 |

|      |      |   |   |             |             |             |
|------|------|---|---|-------------|-------------|-------------|
| 2246 | 2246 | 3 | 0 | 0           | 1.73766822  | 63.91679416 |
| 2247 | 2247 | 3 | 0 | 18.86120294 | 0           | 63.91679416 |
| 2248 | 2248 | 3 | 0 | 14.14590221 | 1.73766822  | 63.91679416 |
| 2249 | 2249 | 3 | 0 | 9.430601469 | 3.475336426 | 63.91679416 |
| 2250 | 2250 | 3 | 0 | 23.57650368 | 3.475336426 | 63.91679416 |
| 2251 | 2251 | 3 | 0 | 4.715300733 | 5.213004642 | 63.91679416 |
| 2252 | 2252 | 3 | 0 | 0           | 6.950672859 | 63.91679416 |
| 2253 | 2253 | 3 | 0 | 18.86120294 | 5.213004642 | 63.91679416 |
| 2254 | 2254 | 3 | 0 | 14.14590221 | 6.950672859 | 63.91679416 |
| 2255 | 2255 | 3 | 0 | 9.430601469 | 8.688341064 | 63.91679416 |
| 2256 | 2256 | 3 | 0 | 23.57650368 | 8.688341064 | 63.91679416 |
| 2257 | 2257 | 3 | 0 | 4.715300733 | 10.42600928 | 63.91679416 |
| 2258 | 2258 | 3 | 0 | 0           | 12.1636775  | 63.91679416 |
| 2259 | 2259 | 3 | 0 | 18.86120294 | 10.42600928 | 63.91679416 |
| 2260 | 2260 | 3 | 0 | 14.14590221 | 12.1636775  | 63.91679416 |
| 2261 | 2261 | 3 | 0 | 9.430601469 | 13.9013457  | 63.91679416 |
| 2262 | 2262 | 3 | 0 | 23.57650368 | 13.9013457  | 63.91679416 |
| 2263 | 2263 | 3 | 0 | 4.715300733 | 15.63901392 | 63.91679416 |
| 2264 | 2264 | 3 | 0 | 0           | 17.37668214 | 63.91679416 |
| 2265 | 2265 | 3 | 0 | 18.86120294 | 15.63901392 | 63.91679416 |
| 2266 | 2266 | 3 | 0 | 14.14590221 | 17.37668214 | 63.91679416 |
| 2267 | 2267 | 3 | 0 | 9.430601469 | 19.11435034 | 63.91679416 |
| 2268 | 2268 | 3 | 0 | 23.57650368 | 19.11435034 | 63.91679416 |
| 2269 | 2269 | 3 | 0 | 4.715300733 | 20.85201856 | 63.91679416 |
| 2270 | 2270 | 3 | 0 | 0           | 22.58968677 | 63.91679416 |
| 2271 | 2271 | 3 | 0 | 18.86120294 | 20.85201856 | 63.91679416 |
| 2272 | 2272 | 3 | 0 | 14.14590221 | 22.58968677 | 63.91679416 |
| 2273 | 2273 | 3 | 0 | 9.430601469 | 24.32735498 | 63.91679416 |
| 2274 | 2274 | 3 | 0 | 23.57650368 | 24.32735498 | 63.91679416 |
| 2275 | 2275 | 3 | 0 | 4.715300733 | 26.0650232  | 63.91679416 |
| 2276 | 2276 | 3 | 0 | 0           | 27.80269141 | 63.91679416 |
| 2277 | 2277 | 3 | 0 | 18.86120294 | 26.0650232  | 63.91679416 |
| 2278 | 2278 | 3 | 0 | 14.14590221 | 27.80269141 | 63.91679416 |
| 2279 | 2279 | 3 | 0 | 9.430601469 | 29.54035962 | 63.91679416 |
| 2280 | 2280 | 3 | 0 | 23.57650368 | 29.54035962 | 63.91679416 |
| 2281 | 2281 | 3 | 0 | 9.430601469 | 0.86883411  | 65.3334927  |
| 2282 | 2282 | 3 | 0 | 23.57650368 | 0.86883411  | 65.3334927  |
| 2283 | 2283 | 3 | 0 | 4.715300733 | 2.60650232  | 65.3334927  |
| 2284 | 2284 | 3 | 0 | 0           | 4.34417054  | 65.3334927  |
| 2285 | 2285 | 3 | 0 | 18.86120294 | 2.60650232  | 65.3334927  |
| 2286 | 2286 | 3 | 0 | 14.14590221 | 4.34417054  | 65.3334927  |
| 2287 | 2287 | 3 | 0 | 9.430601469 | 6.081838745 | 65.3334927  |
| 2288 | 2288 | 3 | 0 | 23.57650368 | 6.081838745 | 65.3334927  |
| 2289 | 2289 | 3 | 0 | 4.715300733 | 7.819506962 | 65.3334927  |
| 2290 | 2290 | 3 | 0 | 0           | 9.557175178 | 65.3334927  |
| 2291 | 2291 | 3 | 0 | 18.86120294 | 7.819506962 | 65.3334927  |
| 2292 | 2292 | 3 | 0 | 14.14590221 | 9.557175178 | 65.3334927  |
| 2293 | 2293 | 3 | 0 | 9.430601469 | 11.29484338 | 65.3334927  |
| 2294 | 2294 | 3 | 0 | 23.57650368 | 11.29484338 | 65.3334927  |
| 2295 | 2295 | 3 | 0 | 4.715300733 | 13.0325116  | 65.3334927  |
| 2296 | 2296 | 3 | 0 | 0           | 14.77017982 | 65.3334927  |

|      |      |   |   |             |             |             |
|------|------|---|---|-------------|-------------|-------------|
| 2297 | 2297 | 3 | 0 | 18.86120294 | 13.0325116  | 65.3334927  |
| 2298 | 2298 | 3 | 0 | 14.14590221 | 14.77017982 | 65.3334927  |
| 2299 | 2299 | 3 | 0 | 9.430601469 | 16.50784802 | 65.3334927  |
| 2300 | 2300 | 3 | 0 | 23.57650368 | 16.50784802 | 65.3334927  |
| 2301 | 2301 | 3 | 0 | 4.715300733 | 18.24551624 | 65.3334927  |
| 2302 | 2302 | 3 | 0 | 0           | 19.98318446 | 65.3334927  |
| 2303 | 2303 | 3 | 0 | 18.86120294 | 18.24551624 | 65.3334927  |
| 2304 | 2304 | 3 | 0 | 14.14590221 | 19.98318446 | 65.3334927  |
| 2305 | 2305 | 3 | 0 | 9.430601469 | 21.72085266 | 65.3334927  |
| 2306 | 2306 | 3 | 0 | 23.57650368 | 21.72085266 | 65.3334927  |
| 2307 | 2307 | 3 | 0 | 4.715300733 | 23.45852088 | 65.3334927  |
| 2308 | 2308 | 3 | 0 | 0           | 25.19618909 | 65.3334927  |
| 2309 | 2309 | 3 | 0 | 18.86120294 | 23.45852088 | 65.3334927  |
| 2310 | 2310 | 3 | 0 | 14.14590221 | 25.19618909 | 65.3334927  |
| 2311 | 2311 | 3 | 0 | 9.430601469 | 26.9338573  | 65.3334927  |
| 2312 | 2312 | 3 | 0 | 23.57650368 | 26.9338573  | 65.3334927  |
| 2313 | 2313 | 3 | 0 | 4.715300733 | 28.67152552 | 65.3334927  |
| 2314 | 2314 | 3 | 0 | 0           | 30.40919373 | 65.3334927  |
| 2315 | 2315 | 3 | 0 | 18.86120294 | 28.67152552 | 65.3334927  |
| 2316 | 2316 | 3 | 0 | 14.14590221 | 30.40919373 | 65.3334927  |
| 2317 | 2317 | 3 | 0 | 4.715300733 | 0           | 66.75019124 |
| 2318 | 2318 | 3 | 0 | 0           | 1.73766822  | 66.75019124 |
| 2319 | 2319 | 3 | 0 | 18.86120294 | 0           | 66.75019124 |
| 2320 | 2320 | 3 | 0 | 14.14590221 | 1.73766822  | 66.75019124 |
| 2321 | 2321 | 3 | 0 | 9.430601469 | 3.475336426 | 66.75019124 |
| 2322 | 2322 | 3 | 0 | 23.57650368 | 3.475336426 | 66.75019124 |
| 2323 | 2323 | 3 | 0 | 4.715300733 | 5.213004642 | 66.75019124 |
| 2324 | 2324 | 3 | 0 | 0           | 6.950672859 | 66.75019124 |
| 2325 | 2325 | 3 | 0 | 18.86120294 | 5.213004642 | 66.75019124 |
| 2326 | 2326 | 3 | 0 | 14.14590221 | 6.950672859 | 66.75019124 |
| 2327 | 2327 | 3 | 0 | 9.430601469 | 8.688341064 | 66.75019124 |
| 2328 | 2328 | 3 | 0 | 23.57650368 | 8.688341064 | 66.75019124 |
| 2329 | 2329 | 3 | 0 | 4.715300733 | 10.42600928 | 66.75019124 |
| 2330 | 2330 | 3 | 0 | 0           | 12.1636775  | 66.75019124 |
| 2331 | 2331 | 3 | 0 | 18.86120294 | 10.42600928 | 66.75019124 |
| 2332 | 2332 | 3 | 0 | 14.14590221 | 12.1636775  | 66.75019124 |
| 2333 | 2333 | 3 | 0 | 9.430601469 | 13.9013457  | 66.75019124 |
| 2334 | 2334 | 3 | 0 | 23.57650368 | 13.9013457  | 66.75019124 |
| 2335 | 2335 | 3 | 0 | 4.715300733 | 15.63901392 | 66.75019124 |
| 2336 | 2336 | 3 | 0 | 0           | 17.37668214 | 66.75019124 |
| 2337 | 2337 | 3 | 0 | 18.86120294 | 15.63901392 | 66.75019124 |
| 2338 | 2338 | 3 | 0 | 14.14590221 | 17.37668214 | 66.75019124 |
| 2339 | 2339 | 3 | 0 | 9.430601469 | 19.11435034 | 66.75019124 |
| 2340 | 2340 | 3 | 0 | 23.57650368 | 19.11435034 | 66.75019124 |
| 2341 | 2341 | 3 | 0 | 4.715300733 | 20.85201856 | 66.75019124 |
| 2342 | 2342 | 3 | 0 | 0           | 22.58968677 | 66.75019124 |
| 2343 | 2343 | 3 | 0 | 18.86120294 | 20.85201856 | 66.75019124 |
| 2344 | 2344 | 3 | 0 | 14.14590221 | 22.58968677 | 66.75019124 |
| 2345 | 2345 | 3 | 0 | 9.430601469 | 24.32735498 | 66.75019124 |
| 2346 | 2346 | 3 | 0 | 23.57650368 | 24.32735498 | 66.75019124 |
| 2347 | 2347 | 3 | 0 | 4.715300733 | 26.0650232  | 66.75019124 |

|      |      |   |   |             |             |             |
|------|------|---|---|-------------|-------------|-------------|
| 2348 | 2348 | 3 | 0 | 0           | 27.80269141 | 66.75019124 |
| 2349 | 2349 | 3 | 0 | 18.86120294 | 26.0650232  | 66.75019124 |
| 2350 | 2350 | 3 | 0 | 14.14590221 | 27.80269141 | 66.75019124 |
| 2351 | 2351 | 3 | 0 | 9.430601469 | 29.54035962 | 66.75019124 |
| 2352 | 2352 | 3 | 0 | 23.57650368 | 29.54035962 | 66.75019124 |
| 2353 | 2353 | 3 | 0 | 9.430601469 | 0.86883411  | 68.16688978 |
| 2354 | 2354 | 3 | 0 | 23.57650368 | 0.86883411  | 68.16688978 |
| 2355 | 2355 | 3 | 0 | 4.715300733 | 2.60650232  | 68.16688978 |
| 2356 | 2356 | 3 | 0 | 0           | 4.34417054  | 68.16688978 |
| 2357 | 2357 | 3 | 0 | 18.86120294 | 2.60650232  | 68.16688978 |
| 2358 | 2358 | 3 | 0 | 14.14590221 | 4.34417054  | 68.16688978 |
| 2359 | 2359 | 3 | 0 | 9.430601469 | 6.081838745 | 68.16688978 |
| 2360 | 2360 | 3 | 0 | 23.57650368 | 6.081838745 | 68.16688978 |
| 2361 | 2361 | 3 | 0 | 4.715300733 | 7.819506962 | 68.16688978 |
| 2362 | 2362 | 3 | 0 | 0           | 9.557175178 | 68.16688978 |
| 2363 | 2363 | 3 | 0 | 18.86120294 | 7.819506962 | 68.16688978 |
| 2364 | 2364 | 3 | 0 | 14.14590221 | 9.557175178 | 68.16688978 |
| 2365 | 2365 | 3 | 0 | 9.430601469 | 11.29484338 | 68.16688978 |
| 2366 | 2366 | 3 | 0 | 23.57650368 | 11.29484338 | 68.16688978 |
| 2367 | 2367 | 3 | 0 | 4.715300733 | 13.0325116  | 68.16688978 |
| 2368 | 2368 | 3 | 0 | 0           | 14.77017982 | 68.16688978 |
| 2369 | 2369 | 3 | 0 | 18.86120294 | 13.0325116  | 68.16688978 |
| 2370 | 2370 | 3 | 0 | 14.14590221 | 14.77017982 | 68.16688978 |
| 2371 | 2371 | 3 | 0 | 9.430601469 | 16.50784802 | 68.16688978 |
| 2372 | 2372 | 3 | 0 | 23.57650368 | 16.50784802 | 68.16688978 |
| 2373 | 2373 | 3 | 0 | 4.715300733 | 18.24551624 | 68.16688978 |
| 2374 | 2374 | 3 | 0 | 0           | 19.98318446 | 68.16688978 |
| 2375 | 2375 | 3 | 0 | 18.86120294 | 18.24551624 | 68.16688978 |
| 2376 | 2376 | 3 | 0 | 14.14590221 | 19.98318446 | 68.16688978 |
| 2377 | 2377 | 3 | 0 | 9.430601469 | 21.72085266 | 68.16688978 |
| 2378 | 2378 | 3 | 0 | 23.57650368 | 21.72085266 | 68.16688978 |
| 2379 | 2379 | 3 | 0 | 4.715300733 | 23.45852088 | 68.16688978 |
| 2380 | 2380 | 3 | 0 | 0           | 25.19618909 | 68.16688978 |
| 2381 | 2381 | 3 | 0 | 18.86120294 | 23.45852088 | 68.16688978 |
| 2382 | 2382 | 3 | 0 | 14.14590221 | 25.19618909 | 68.16688978 |
| 2383 | 2383 | 3 | 0 | 9.430601469 | 26.9338573  | 68.16688978 |
| 2384 | 2384 | 3 | 0 | 23.57650368 | 26.9338573  | 68.16688978 |
| 2385 | 2385 | 3 | 0 | 4.715300733 | 28.67152552 | 68.16688978 |
| 2386 | 2386 | 3 | 0 | 0           | 30.40919373 | 68.16688978 |
| 2387 | 2387 | 3 | 0 | 18.86120294 | 28.67152552 | 68.16688978 |
| 2388 | 2388 | 3 | 0 | 14.14590221 | 30.40919373 | 68.16688978 |
| 2389 | 2389 | 3 | 0 | 4.715300733 | 0           | 69.58358832 |
| 2390 | 2390 | 3 | 0 | 0           | 1.73766822  | 69.58358832 |
| 2391 | 2391 | 3 | 0 | 18.86120294 | 0           | 69.58358832 |
| 2392 | 2392 | 3 | 0 | 14.14590221 | 1.73766822  | 69.58358832 |
| 2393 | 2393 | 3 | 0 | 9.430601469 | 3.475336426 | 69.58358832 |
| 2394 | 2394 | 3 | 0 | 23.57650368 | 3.475336426 | 69.58358832 |
| 2395 | 2395 | 3 | 0 | 4.715300733 | 5.213004642 | 69.58358832 |
| 2396 | 2396 | 3 | 0 | 0           | 6.950672859 | 69.58358832 |
| 2397 | 2397 | 3 | 0 | 18.86120294 | 5.213004642 | 69.58358832 |
| 2398 | 2398 | 3 | 0 | 14.14590221 | 6.950672859 | 69.58358832 |



|      |      |   |   |             |             |             |
|------|------|---|---|-------------|-------------|-------------|
| 2399 | 2399 | 3 | 0 | 9.430601469 | 8.688341064 | 69.58358832 |
| 2400 | 2400 | 3 | 0 | 23.57650368 | 8.688341064 | 69.58358832 |
| 2401 | 2401 | 3 | 0 | 4.715300733 | 10.42600928 | 69.58358832 |
| 2402 | 2402 | 3 | 0 | 0           | 12.1636775  | 69.58358832 |
| 2403 | 2403 | 3 | 0 | 18.86120294 | 10.42600928 | 69.58358832 |
| 2404 | 2404 | 3 | 0 | 14.14590221 | 12.1636775  | 69.58358832 |
| 2405 | 2405 | 3 | 0 | 9.430601469 | 13.9013457  | 69.58358832 |
| 2406 | 2406 | 3 | 0 | 23.57650368 | 13.9013457  | 69.58358832 |
| 2407 | 2407 | 3 | 0 | 4.715300733 | 15.63901392 | 69.58358832 |
| 2408 | 2408 | 3 | 0 | 0           | 17.37668214 | 69.58358832 |
| 2409 | 2409 | 3 | 0 | 18.86120294 | 15.63901392 | 69.58358832 |
| 2410 | 2410 | 3 | 0 | 14.14590221 | 17.37668214 | 69.58358832 |
| 2411 | 2411 | 3 | 0 | 9.430601469 | 19.11435034 | 69.58358832 |
| 2412 | 2412 | 3 | 0 | 23.57650368 | 19.11435034 | 69.58358832 |
| 2413 | 2413 | 3 | 0 | 4.715300733 | 20.85201856 | 69.58358832 |
| 2414 | 2414 | 3 | 0 | 0           | 22.58968677 | 69.58358832 |
| 2415 | 2415 | 3 | 0 | 18.86120294 | 20.85201856 | 69.58358832 |
| 2416 | 2416 | 3 | 0 | 14.14590221 | 22.58968677 | 69.58358832 |
| 2417 | 2417 | 3 | 0 | 9.430601469 | 24.32735498 | 69.58358832 |
| 2418 | 2418 | 3 | 0 | 23.57650368 | 24.32735498 | 69.58358832 |
| 2419 | 2419 | 3 | 0 | 4.715300733 | 26.0650232  | 69.58358832 |
| 2420 | 2420 | 3 | 0 | 0           | 27.80269141 | 69.58358832 |
| 2421 | 2421 | 3 | 0 | 18.86120294 | 26.0650232  | 69.58358832 |
| 2422 | 2422 | 3 | 0 | 14.14590221 | 27.80269141 | 69.58358832 |
| 2423 | 2423 | 3 | 0 | 9.430601469 | 29.54035962 | 69.58358832 |
| 2424 | 2424 | 3 | 0 | 23.57650368 | 29.54035962 | 69.58358832 |
| 2425 | 2425 | 3 | 0 | 9.430601469 | 0.86883411  | 71.00028686 |
| 2426 | 2426 | 3 | 0 | 23.57650368 | 0.86883411  | 71.00028686 |
| 2427 | 2427 | 3 | 0 | 4.715300733 | 2.60650232  | 71.00028686 |
| 2428 | 2428 | 3 | 0 | 0           | 4.34417054  | 71.00028686 |
| 2429 | 2429 | 3 | 0 | 18.86120294 | 2.60650232  | 71.00028686 |
| 2430 | 2430 | 3 | 0 | 14.14590221 | 4.34417054  | 71.00028686 |
| 2431 | 2431 | 3 | 0 | 9.430601469 | 6.081838745 | 71.00028686 |
| 2432 | 2432 | 3 | 0 | 23.57650368 | 6.081838745 | 71.00028686 |
| 2433 | 2433 | 3 | 0 | 4.715300733 | 7.819506962 | 71.00028686 |
| 2434 | 2434 | 3 | 0 | 0           | 9.557175178 | 71.00028686 |
| 2435 | 2435 | 3 | 0 | 18.86120294 | 7.819506962 | 71.00028686 |
| 2436 | 2436 | 3 | 0 | 14.14590221 | 9.557175178 | 71.00028686 |
| 2437 | 2437 | 3 | 0 | 9.430601469 | 11.29484338 | 71.00028686 |
| 2438 | 2438 | 3 | 0 | 23.57650368 | 11.29484338 | 71.00028686 |
| 2439 | 2439 | 3 | 0 | 4.715300733 | 13.0325116  | 71.00028686 |
| 2440 | 2440 | 3 | 0 | 0           | 14.77017982 | 71.00028686 |
| 2441 | 2441 | 3 | 0 | 18.86120294 | 13.0325116  | 71.00028686 |
| 2442 | 2442 | 3 | 0 | 14.14590221 | 14.77017982 | 71.00028686 |
| 2443 | 2443 | 3 | 0 | 9.430601469 | 16.50784802 | 71.00028686 |
| 2444 | 2444 | 3 | 0 | 23.57650368 | 16.50784802 | 71.00028686 |
| 2445 | 2445 | 3 | 0 | 4.715300733 | 18.24551624 | 71.00028686 |
| 2446 | 2446 | 3 | 0 | 0           | 19.98318446 | 71.00028686 |
| 2447 | 2447 | 3 | 0 | 18.86120294 | 18.24551624 | 71.00028686 |
| 2448 | 2448 | 3 | 0 | 14.14590221 | 19.98318446 | 71.00028686 |
| 2449 | 2449 | 3 | 0 | 9.430601469 | 21.72085266 | 71.00028686 |

|      |      |   |   |             |             |             |
|------|------|---|---|-------------|-------------|-------------|
| 2450 | 2450 | 3 | 0 | 23.57650368 | 21.72085266 | 71.00028686 |
| 2451 | 2451 | 3 | 0 | 4.715300733 | 23.45852088 | 71.00028686 |
| 2452 | 2452 | 3 | 0 | 0           | 25.19618909 | 71.00028686 |
| 2453 | 2453 | 3 | 0 | 18.86120294 | 23.45852088 | 71.00028686 |
| 2454 | 2454 | 3 | 0 | 14.14590221 | 25.19618909 | 71.00028686 |
| 2455 | 2455 | 3 | 0 | 9.430601469 | 26.9338573  | 71.00028686 |
| 2456 | 2456 | 3 | 0 | 23.57650368 | 26.9338573  | 71.00028686 |
| 2457 | 2457 | 3 | 0 | 4.715300733 | 28.67152552 | 71.00028686 |
| 2458 | 2458 | 3 | 0 | 0           | 30.40919373 | 71.00028686 |
| 2459 | 2459 | 3 | 0 | 18.86120294 | 28.67152552 | 71.00028686 |
| 2460 | 2460 | 3 | 0 | 14.14590221 | 30.40919373 | 71.00028686 |
| 2461 | 2461 | 3 | 0 | 4.715300733 | 0           | 72.4169854  |
| 2462 | 2462 | 3 | 0 | 0           | 1.73766822  | 72.4169854  |
| 2463 | 2463 | 3 | 0 | 18.86120294 | 0           | 72.4169854  |
| 2464 | 2464 | 3 | 0 | 14.14590221 | 1.73766822  | 72.4169854  |
| 2465 | 2465 | 3 | 0 | 9.430601469 | 3.475336426 | 72.4169854  |
| 2466 | 2466 | 3 | 0 | 23.57650368 | 3.475336426 | 72.4169854  |
| 2467 | 2467 | 3 | 0 | 4.715300733 | 5.213004642 | 72.4169854  |
| 2468 | 2468 | 3 | 0 | 0           | 6.950672859 | 72.4169854  |
| 2469 | 2469 | 3 | 0 | 18.86120294 | 5.213004642 | 72.4169854  |
| 2470 | 2470 | 3 | 0 | 14.14590221 | 6.950672859 | 72.4169854  |
| 2471 | 2471 | 3 | 0 | 9.430601469 | 8.688341064 | 72.4169854  |
| 2472 | 2472 | 3 | 0 | 23.57650368 | 8.688341064 | 72.4169854  |
| 2473 | 2473 | 3 | 0 | 4.715300733 | 10.42600928 | 72.4169854  |
| 2474 | 2474 | 3 | 0 | 0           | 12.1636775  | 72.4169854  |
| 2475 | 2475 | 3 | 0 | 18.86120294 | 10.42600928 | 72.4169854  |
| 2476 | 2476 | 3 | 0 | 14.14590221 | 12.1636775  | 72.4169854  |
| 2477 | 2477 | 3 | 0 | 9.430601469 | 13.9013457  | 72.4169854  |
| 2478 | 2478 | 3 | 0 | 23.57650368 | 13.9013457  | 72.4169854  |
| 2479 | 2479 | 3 | 0 | 4.715300733 | 15.63901392 | 72.4169854  |
| 2480 | 2480 | 3 | 0 | 0           | 17.37668214 | 72.4169854  |
| 2481 | 2481 | 3 | 0 | 18.86120294 | 15.63901392 | 72.4169854  |
| 2482 | 2482 | 3 | 0 | 14.14590221 | 17.37668214 | 72.4169854  |
| 2483 | 2483 | 3 | 0 | 9.430601469 | 19.11435034 | 72.4169854  |
| 2484 | 2484 | 3 | 0 | 23.57650368 | 19.11435034 | 72.4169854  |
| 2485 | 2485 | 3 | 0 | 4.715300733 | 20.85201856 | 72.4169854  |
| 2486 | 2486 | 3 | 0 | 0           | 22.58968677 | 72.4169854  |
| 2487 | 2487 | 3 | 0 | 18.86120294 | 20.85201856 | 72.4169854  |
| 2488 | 2488 | 3 | 0 | 14.14590221 | 22.58968677 | 72.4169854  |
| 2489 | 2489 | 3 | 0 | 9.430601469 | 24.32735498 | 72.4169854  |
| 2490 | 2490 | 3 | 0 | 23.57650368 | 24.32735498 | 72.4169854  |
| 2491 | 2491 | 3 | 0 | 4.715300733 | 26.0650232  | 72.4169854  |
| 2492 | 2492 | 3 | 0 | 0           | 27.80269141 | 72.4169854  |
| 2493 | 2493 | 3 | 0 | 18.86120294 | 26.0650232  | 72.4169854  |
| 2494 | 2494 | 3 | 0 | 14.14590221 | 27.80269141 | 72.4169854  |
| 2495 | 2495 | 3 | 0 | 9.430601469 | 29.54035962 | 72.4169854  |
| 2496 | 2496 | 3 | 0 | 23.57650368 | 29.54035962 | 72.4169854  |
| 2497 | 2497 | 3 | 0 | 9.430601469 | 0.86883411  | 73.83368394 |
| 2498 | 2498 | 3 | 0 | 23.57650368 | 0.86883411  | 73.83368394 |
| 2499 | 2499 | 3 | 0 | 4.715300733 | 2.60650232  | 73.83368394 |
| 2500 | 2500 | 3 | 0 | 0           | 4.34417054  | 73.83368394 |

|      |      |   |   |             |             |             |
|------|------|---|---|-------------|-------------|-------------|
| 2501 | 2501 | 3 | 0 | 18.86120294 | 2.60650232  | 73.83368394 |
| 2502 | 2502 | 3 | 0 | 14.14590221 | 4.34417054  | 73.83368394 |
| 2503 | 2503 | 3 | 0 | 9.430601469 | 6.081838745 | 73.83368394 |
| 2504 | 2504 | 3 | 0 | 23.57650368 | 6.081838745 | 73.83368394 |
| 2505 | 2505 | 3 | 0 | 4.715300733 | 7.819506962 | 73.83368394 |
| 2506 | 2506 | 3 | 0 | 0           | 9.557175178 | 73.83368394 |
| 2507 | 2507 | 3 | 0 | 18.86120294 | 7.819506962 | 73.83368394 |
| 2508 | 2508 | 3 | 0 | 14.14590221 | 9.557175178 | 73.83368394 |
| 2509 | 2509 | 3 | 0 | 9.430601469 | 11.29484338 | 73.83368394 |
| 2510 | 2510 | 3 | 0 | 23.57650368 | 11.29484338 | 73.83368394 |
| 2511 | 2511 | 3 | 0 | 4.715300733 | 13.0325116  | 73.83368394 |
| 2512 | 2512 | 3 | 0 | 0           | 14.77017982 | 73.83368394 |
| 2513 | 2513 | 3 | 0 | 18.86120294 | 13.0325116  | 73.83368394 |
| 2514 | 2514 | 3 | 0 | 14.14590221 | 14.77017982 | 73.83368394 |
| 2515 | 2515 | 3 | 0 | 9.430601469 | 16.50784802 | 73.83368394 |
| 2516 | 2516 | 3 | 0 | 23.57650368 | 16.50784802 | 73.83368394 |
| 2517 | 2517 | 3 | 0 | 4.715300733 | 18.24551624 | 73.83368394 |
| 2518 | 2518 | 3 | 0 | 0           | 19.98318446 | 73.83368394 |
| 2519 | 2519 | 3 | 0 | 18.86120294 | 18.24551624 | 73.83368394 |
| 2520 | 2520 | 3 | 0 | 14.14590221 | 19.98318446 | 73.83368394 |
| 2521 | 2521 | 3 | 0 | 9.430601469 | 21.72085266 | 73.83368394 |
| 2522 | 2522 | 3 | 0 | 23.57650368 | 21.72085266 | 73.83368394 |
| 2523 | 2523 | 3 | 0 | 4.715300733 | 23.45852088 | 73.83368394 |
| 2524 | 2524 | 3 | 0 | 0           | 25.19618909 | 73.83368394 |
| 2525 | 2525 | 3 | 0 | 18.86120294 | 23.45852088 | 73.83368394 |
| 2526 | 2526 | 3 | 0 | 14.14590221 | 25.19618909 | 73.83368394 |
| 2527 | 2527 | 3 | 0 | 9.430601469 | 26.9338573  | 73.83368394 |
| 2528 | 2528 | 3 | 0 | 23.57650368 | 26.9338573  | 73.83368394 |
| 2529 | 2529 | 3 | 0 | 4.715300733 | 28.67152552 | 73.83368394 |
| 2530 | 2530 | 3 | 0 | 0           | 30.40919373 | 73.83368394 |
| 2531 | 2531 | 3 | 0 | 18.86120294 | 28.67152552 | 73.83368394 |
| 2532 | 2532 | 3 | 0 | 14.14590221 | 30.40919373 | 73.83368394 |
| 2533 | 2533 | 3 | 0 | 4.715300733 | 0           | 75.25038248 |
| 2534 | 2534 | 3 | 0 | 0           | 1.73766822  | 75.25038248 |
| 2535 | 2535 | 3 | 0 | 18.86120294 | 0           | 75.25038248 |
| 2536 | 2536 | 3 | 0 | 14.14590221 | 1.73766822  | 75.25038248 |
| 2537 | 2537 | 3 | 0 | 9.430601469 | 3.475336426 | 75.25038248 |
| 2538 | 2538 | 3 | 0 | 23.57650368 | 3.475336426 | 75.25038248 |
| 2539 | 2539 | 3 | 0 | 4.715300733 | 5.213004642 | 75.25038248 |
| 2540 | 2540 | 3 | 0 | 0           | 6.950672859 | 75.25038248 |
| 2541 | 2541 | 3 | 0 | 18.86120294 | 5.213004642 | 75.25038248 |
| 2542 | 2542 | 3 | 0 | 14.14590221 | 6.950672859 | 75.25038248 |
| 2543 | 2543 | 3 | 0 | 9.430601469 | 8.688341064 | 75.25038248 |
| 2544 | 2544 | 3 | 0 | 23.57650368 | 8.688341064 | 75.25038248 |
| 2545 | 2545 | 3 | 0 | 4.715300733 | 10.42600928 | 75.25038248 |
| 2546 | 2546 | 3 | 0 | 0           | 12.1636775  | 75.25038248 |
| 2547 | 2547 | 3 | 0 | 18.86120294 | 10.42600928 | 75.25038248 |
| 2548 | 2548 | 3 | 0 | 14.14590221 | 12.1636775  | 75.25038248 |
| 2549 | 2549 | 3 | 0 | 9.430601469 | 13.9013457  | 75.25038248 |
| 2550 | 2550 | 3 | 0 | 23.57650368 | 13.9013457  | 75.25038248 |
| 2551 | 2551 | 3 | 0 | 4.715300733 | 15.63901392 | 75.25038248 |

|      |      |   |   |             |             |             |
|------|------|---|---|-------------|-------------|-------------|
| 2552 | 2552 | 3 | 0 | 0           | 17.37668214 | 75.25038248 |
| 2553 | 2553 | 3 | 0 | 18.86120294 | 15.63901392 | 75.25038248 |
| 2554 | 2554 | 3 | 0 | 14.14590221 | 17.37668214 | 75.25038248 |
| 2555 | 2555 | 3 | 0 | 9.430601469 | 19.11435034 | 75.25038248 |
| 2556 | 2556 | 3 | 0 | 23.57650368 | 19.11435034 | 75.25038248 |
| 2557 | 2557 | 3 | 0 | 4.715300733 | 20.85201856 | 75.25038248 |
| 2558 | 2558 | 3 | 0 | 0           | 22.58968677 | 75.25038248 |
| 2559 | 2559 | 3 | 0 | 18.86120294 | 20.85201856 | 75.25038248 |
| 2560 | 2560 | 3 | 0 | 14.14590221 | 22.58968677 | 75.25038248 |
| 2561 | 2561 | 3 | 0 | 9.430601469 | 24.32735498 | 75.25038248 |
| 2562 | 2562 | 3 | 0 | 23.57650368 | 24.32735498 | 75.25038248 |
| 2563 | 2563 | 3 | 0 | 4.715300733 | 26.0650232  | 75.25038248 |
| 2564 | 2564 | 3 | 0 | 0           | 27.80269141 | 75.25038248 |
| 2565 | 2565 | 3 | 0 | 18.86120294 | 26.0650232  | 75.25038248 |
| 2566 | 2566 | 3 | 0 | 14.14590221 | 27.80269141 | 75.25038248 |
| 2567 | 2567 | 3 | 0 | 9.430601469 | 29.54035962 | 75.25038248 |
| 2568 | 2568 | 3 | 0 | 23.57650368 | 29.54035962 | 75.25038248 |
| 2569 | 2569 | 3 | 0 | 9.430601469 | 0.86883411  | 76.66708102 |
| 2570 | 2570 | 3 | 0 | 23.57650368 | 0.86883411  | 76.66708102 |
| 2571 | 2571 | 3 | 0 | 4.715300733 | 2.60650232  | 76.66708102 |
| 2572 | 2572 | 3 | 0 | 0           | 4.34417054  | 76.66708102 |
| 2573 | 2573 | 3 | 0 | 18.86120294 | 2.60650232  | 76.66708102 |
| 2574 | 2574 | 3 | 0 | 14.14590221 | 4.34417054  | 76.66708102 |
| 2575 | 2575 | 3 | 0 | 9.430601469 | 6.081838745 | 76.66708102 |
| 2576 | 2576 | 3 | 0 | 23.57650368 | 6.081838745 | 76.66708102 |
| 2577 | 2577 | 3 | 0 | 4.715300733 | 7.819506962 | 76.66708102 |
| 2578 | 2578 | 3 | 0 | 0           | 9.557175178 | 76.66708102 |
| 2579 | 2579 | 3 | 0 | 18.86120294 | 7.819506962 | 76.66708102 |
| 2580 | 2580 | 3 | 0 | 14.14590221 | 9.557175178 | 76.66708102 |
| 2581 | 2581 | 3 | 0 | 9.430601469 | 11.29484338 | 76.66708102 |
| 2582 | 2582 | 3 | 0 | 23.57650368 | 11.29484338 | 76.66708102 |
| 2583 | 2583 | 3 | 0 | 4.715300733 | 13.0325116  | 76.66708102 |
| 2584 | 2584 | 3 | 0 | 0           | 14.77017982 | 76.66708102 |
| 2585 | 2585 | 3 | 0 | 18.86120294 | 13.0325116  | 76.66708102 |
| 2586 | 2586 | 3 | 0 | 14.14590221 | 14.77017982 | 76.66708102 |
| 2587 | 2587 | 3 | 0 | 9.430601469 | 16.50784802 | 76.66708102 |
| 2588 | 2588 | 3 | 0 | 23.57650368 | 16.50784802 | 76.66708102 |
| 2589 | 2589 | 3 | 0 | 4.715300733 | 18.24551624 | 76.66708102 |
| 2590 | 2590 | 3 | 0 | 0           | 19.98318446 | 76.66708102 |
| 2591 | 2591 | 3 | 0 | 18.86120294 | 18.24551624 | 76.66708102 |
| 2592 | 2592 | 3 | 0 | 14.14590221 | 19.98318446 | 76.66708102 |
| 2593 | 2593 | 3 | 0 | 9.430601469 | 21.72085266 | 76.66708102 |
| 2594 | 2594 | 3 | 0 | 23.57650368 | 21.72085266 | 76.66708102 |
| 2595 | 2595 | 3 | 0 | 4.715300733 | 23.45852088 | 76.66708102 |
| 2596 | 2596 | 3 | 0 | 0           | 25.19618909 | 76.66708102 |
| 2597 | 2597 | 3 | 0 | 18.86120294 | 23.45852088 | 76.66708102 |
| 2598 | 2598 | 3 | 0 | 14.14590221 | 25.19618909 | 76.66708102 |
| 2599 | 2599 | 3 | 0 | 9.430601469 | 26.9338573  | 76.66708102 |
| 2600 | 2600 | 3 | 0 | 23.57650368 | 26.9338573  | 76.66708102 |
| 2601 | 2601 | 3 | 0 | 4.715300733 | 28.67152552 | 76.66708102 |
| 2602 | 2602 | 3 | 0 | 0           | 30.40919373 | 76.66708102 |

|      |      |   |   |             |             |             |
|------|------|---|---|-------------|-------------|-------------|
| 2603 | 2603 | 3 | 0 | 18.86120294 | 28.67152552 | 76.66708102 |
| 2604 | 2604 | 3 | 0 | 14.14590221 | 30.40919373 | 76.66708102 |
| 2605 | 2605 | 3 | 0 | 4.715300733 | 0           | 78.08377956 |
| 2606 | 2606 | 3 | 0 | 0           | 1.73766822  | 78.08377956 |
| 2607 | 2607 | 3 | 0 | 18.86120294 | 0           | 78.08377956 |
| 2608 | 2608 | 3 | 0 | 14.14590221 | 1.73766822  | 78.08377956 |
| 2609 | 2609 | 3 | 0 | 9.430601469 | 3.475336426 | 78.08377956 |
| 2610 | 2610 | 3 | 0 | 23.57650368 | 3.475336426 | 78.08377956 |
| 2611 | 2611 | 3 | 0 | 4.715300733 | 5.213004642 | 78.08377956 |
| 2612 | 2612 | 3 | 0 | 0           | 6.950672859 | 78.08377956 |
| 2613 | 2613 | 3 | 0 | 18.86120294 | 5.213004642 | 78.08377956 |
| 2614 | 2614 | 3 | 0 | 14.14590221 | 6.950672859 | 78.08377956 |
| 2615 | 2615 | 3 | 0 | 9.430601469 | 8.688341064 | 78.08377956 |
| 2616 | 2616 | 3 | 0 | 23.57650368 | 8.688341064 | 78.08377956 |
| 2617 | 2617 | 3 | 0 | 4.715300733 | 10.42600928 | 78.08377956 |
| 2618 | 2618 | 3 | 0 | 0           | 12.1636775  | 78.08377956 |
| 2619 | 2619 | 3 | 0 | 18.86120294 | 10.42600928 | 78.08377956 |
| 2620 | 2620 | 3 | 0 | 14.14590221 | 12.1636775  | 78.08377956 |
| 2621 | 2621 | 3 | 0 | 9.430601469 | 13.9013457  | 78.08377956 |
| 2622 | 2622 | 3 | 0 | 23.57650368 | 13.9013457  | 78.08377956 |
| 2623 | 2623 | 3 | 0 | 4.715300733 | 15.63901392 | 78.08377956 |
| 2624 | 2624 | 3 | 0 | 0           | 17.37668214 | 78.08377956 |
| 2625 | 2625 | 3 | 0 | 18.86120294 | 15.63901392 | 78.08377956 |
| 2626 | 2626 | 3 | 0 | 14.14590221 | 17.37668214 | 78.08377956 |
| 2627 | 2627 | 3 | 0 | 9.430601469 | 19.11435034 | 78.08377956 |
| 2628 | 2628 | 3 | 0 | 23.57650368 | 19.11435034 | 78.08377956 |
| 2629 | 2629 | 3 | 0 | 4.715300733 | 20.85201856 | 78.08377956 |
| 2630 | 2630 | 3 | 0 | 0           | 22.58968677 | 78.08377956 |
| 2631 | 2631 | 3 | 0 | 18.86120294 | 20.85201856 | 78.08377956 |
| 2632 | 2632 | 3 | 0 | 14.14590221 | 22.58968677 | 78.08377956 |
| 2633 | 2633 | 3 | 0 | 9.430601469 | 24.32735498 | 78.08377956 |
| 2634 | 2634 | 3 | 0 | 23.57650368 | 24.32735498 | 78.08377956 |
| 2635 | 2635 | 3 | 0 | 4.715300733 | 26.0650232  | 78.08377956 |
| 2636 | 2636 | 3 | 0 | 0           | 27.80269141 | 78.08377956 |
| 2637 | 2637 | 3 | 0 | 18.86120294 | 26.0650232  | 78.08377956 |
| 2638 | 2638 | 3 | 0 | 14.14590221 | 27.80269141 | 78.08377956 |
| 2639 | 2639 | 3 | 0 | 9.430601469 | 29.54035962 | 78.08377956 |
| 2640 | 2640 | 3 | 0 | 23.57650368 | 29.54035962 | 78.08377956 |
| 2641 | 2641 | 3 | 0 | 9.430601469 | 0.86883411  | 79.5004781  |
| 2642 | 2642 | 3 | 0 | 23.57650368 | 0.86883411  | 79.5004781  |
| 2643 | 2643 | 3 | 0 | 4.715300733 | 2.60650232  | 79.5004781  |
| 2644 | 2644 | 3 | 0 | 0           | 4.34417054  | 79.5004781  |
| 2645 | 2645 | 3 | 0 | 18.86120294 | 2.60650232  | 79.5004781  |
| 2646 | 2646 | 3 | 0 | 14.14590221 | 4.34417054  | 79.5004781  |
| 2647 | 2647 | 3 | 0 | 9.430601469 | 6.081838745 | 79.5004781  |
| 2648 | 2648 | 3 | 0 | 23.57650368 | 6.081838745 | 79.5004781  |
| 2649 | 2649 | 3 | 0 | 4.715300733 | 7.819506962 | 79.5004781  |
| 2650 | 2650 | 3 | 0 | 0           | 9.557175178 | 79.5004781  |
| 2651 | 2651 | 3 | 0 | 18.86120294 | 7.819506962 | 79.5004781  |
| 2652 | 2652 | 3 | 0 | 14.14590221 | 9.557175178 | 79.5004781  |
| 2653 | 2653 | 3 | 0 | 9.430601469 | 11.29484338 | 79.5004781  |

|      |      |   |   |             |             |             |
|------|------|---|---|-------------|-------------|-------------|
| 2654 | 2654 | 3 | 0 | 23.57650368 | 11.29484338 | 79.5004781  |
| 2655 | 2655 | 3 | 0 | 4.715300733 | 13.0325116  | 79.5004781  |
| 2656 | 2656 | 3 | 0 | 0           | 14.77017982 | 79.5004781  |
| 2657 | 2657 | 3 | 0 | 18.86120294 | 13.0325116  | 79.5004781  |
| 2658 | 2658 | 3 | 0 | 14.14590221 | 14.77017982 | 79.5004781  |
| 2659 | 2659 | 3 | 0 | 9.430601469 | 16.50784802 | 79.5004781  |
| 2660 | 2660 | 3 | 0 | 23.57650368 | 16.50784802 | 79.5004781  |
| 2661 | 2661 | 3 | 0 | 4.715300733 | 18.24551624 | 79.5004781  |
| 2662 | 2662 | 3 | 0 | 0           | 19.98318446 | 79.5004781  |
| 2663 | 2663 | 3 | 0 | 18.86120294 | 18.24551624 | 79.5004781  |
| 2664 | 2664 | 3 | 0 | 14.14590221 | 19.98318446 | 79.5004781  |
| 2665 | 2665 | 3 | 0 | 9.430601469 | 21.72085266 | 79.5004781  |
| 2666 | 2666 | 3 | 0 | 23.57650368 | 21.72085266 | 79.5004781  |
| 2667 | 2667 | 3 | 0 | 4.715300733 | 23.45852088 | 79.5004781  |
| 2668 | 2668 | 3 | 0 | 0           | 25.19618909 | 79.5004781  |
| 2669 | 2669 | 3 | 0 | 18.86120294 | 23.45852088 | 79.5004781  |
| 2670 | 2670 | 3 | 0 | 14.14590221 | 25.19618909 | 79.5004781  |
| 2671 | 2671 | 3 | 0 | 9.430601469 | 26.9338573  | 79.5004781  |
| 2672 | 2672 | 3 | 0 | 23.57650368 | 26.9338573  | 79.5004781  |
| 2673 | 2673 | 3 | 0 | 4.715300733 | 28.67152552 | 79.5004781  |
| 2674 | 2674 | 3 | 0 | 0           | 30.40919373 | 79.5004781  |
| 2675 | 2675 | 3 | 0 | 18.86120294 | 28.67152552 | 79.5004781  |
| 2676 | 2676 | 3 | 0 | 14.14590221 | 30.40919373 | 79.5004781  |
| 2677 | 2677 | 3 | 0 | 4.715300733 | 0           | 80.91717664 |
| 2678 | 2678 | 3 | 0 | 0           | 1.73766822  | 80.91717664 |
| 2679 | 2679 | 3 | 0 | 18.86120294 | 0           | 80.91717664 |
| 2680 | 2680 | 3 | 0 | 14.14590221 | 1.73766822  | 80.91717664 |
| 2681 | 2681 | 3 | 0 | 9.430601469 | 3.475336426 | 80.91717664 |
| 2682 | 2682 | 3 | 0 | 23.57650368 | 3.475336426 | 80.91717664 |
| 2683 | 2683 | 3 | 0 | 4.715300733 | 5.213004642 | 80.91717664 |
| 2684 | 2684 | 3 | 0 | 0           | 6.950672859 | 80.91717664 |
| 2685 | 2685 | 3 | 0 | 18.86120294 | 5.213004642 | 80.91717664 |
| 2686 | 2686 | 3 | 0 | 14.14590221 | 6.950672859 | 80.91717664 |
| 2687 | 2687 | 3 | 0 | 9.430601469 | 8.688341064 | 80.91717664 |
| 2688 | 2688 | 3 | 0 | 23.57650368 | 8.688341064 | 80.91717664 |
| 2689 | 2689 | 3 | 0 | 4.715300733 | 10.42600928 | 80.91717664 |
| 2690 | 2690 | 3 | 0 | 0           | 12.1636775  | 80.91717664 |
| 2691 | 2691 | 3 | 0 | 18.86120294 | 10.42600928 | 80.91717664 |
| 2692 | 2692 | 3 | 0 | 14.14590221 | 12.1636775  | 80.91717664 |
| 2693 | 2693 | 3 | 0 | 9.430601469 | 13.9013457  | 80.91717664 |
| 2694 | 2694 | 3 | 0 | 23.57650368 | 13.9013457  | 80.91717664 |
| 2695 | 2695 | 3 | 0 | 4.715300733 | 15.63901392 | 80.91717664 |
| 2696 | 2696 | 3 | 0 | 0           | 17.37668214 | 80.91717664 |
| 2697 | 2697 | 3 | 0 | 18.86120294 | 15.63901392 | 80.91717664 |
| 2698 | 2698 | 3 | 0 | 14.14590221 | 17.37668214 | 80.91717664 |
| 2699 | 2699 | 3 | 0 | 9.430601469 | 19.11435034 | 80.91717664 |
| 2700 | 2700 | 3 | 0 | 23.57650368 | 19.11435034 | 80.91717664 |
| 2701 | 2701 | 3 | 0 | 4.715300733 | 20.85201856 | 80.91717664 |
| 2702 | 2702 | 3 | 0 | 0           | 22.58968677 | 80.91717664 |
| 2703 | 2703 | 3 | 0 | 18.86120294 | 20.85201856 | 80.91717664 |
| 2704 | 2704 | 3 | 0 | 14.14590221 | 22.58968677 | 80.91717664 |

|      |      |   |   |             |             |             |
|------|------|---|---|-------------|-------------|-------------|
| 2705 | 2705 | 3 | 0 | 9.430601469 | 24.32735498 | 80.91717664 |
| 2706 | 2706 | 3 | 0 | 23.57650368 | 24.32735498 | 80.91717664 |
| 2707 | 2707 | 3 | 0 | 4.715300733 | 26.0650232  | 80.91717664 |
| 2708 | 2708 | 3 | 0 | 0           | 27.80269141 | 80.91717664 |
| 2709 | 2709 | 3 | 0 | 18.86120294 | 26.0650232  | 80.91717664 |
| 2710 | 2710 | 3 | 0 | 14.14590221 | 27.80269141 | 80.91717664 |
| 2711 | 2711 | 3 | 0 | 9.430601469 | 29.54035962 | 80.91717664 |
| 2712 | 2712 | 3 | 0 | 23.57650368 | 29.54035962 | 80.91717664 |
| 2713 | 2713 | 3 | 0 | 9.430601469 | 0.86883411  | 82.33387518 |
| 2714 | 2714 | 3 | 0 | 23.57650368 | 0.86883411  | 82.33387518 |
| 2715 | 2715 | 3 | 0 | 4.715300733 | 2.60650232  | 82.33387518 |
| 2716 | 2716 | 3 | 0 | 0           | 4.34417054  | 82.33387518 |
| 2717 | 2717 | 3 | 0 | 18.86120294 | 2.60650232  | 82.33387518 |
| 2718 | 2718 | 3 | 0 | 14.14590221 | 4.34417054  | 82.33387518 |
| 2719 | 2719 | 3 | 0 | 9.430601469 | 6.081838745 | 82.33387518 |
| 2720 | 2720 | 3 | 0 | 23.57650368 | 6.081838745 | 82.33387518 |
| 2721 | 2721 | 3 | 0 | 4.715300733 | 7.819506962 | 82.33387518 |
| 2722 | 2722 | 3 | 0 | 0           | 9.557175178 | 82.33387518 |
| 2723 | 2723 | 3 | 0 | 18.86120294 | 7.819506962 | 82.33387518 |
| 2724 | 2724 | 3 | 0 | 14.14590221 | 9.557175178 | 82.33387518 |
| 2725 | 2725 | 3 | 0 | 9.430601469 | 11.29484338 | 82.33387518 |
| 2726 | 2726 | 3 | 0 | 23.57650368 | 11.29484338 | 82.33387518 |
| 2727 | 2727 | 3 | 0 | 4.715300733 | 13.0325116  | 82.33387518 |
| 2728 | 2728 | 3 | 0 | 0           | 14.77017982 | 82.33387518 |
| 2729 | 2729 | 3 | 0 | 18.86120294 | 13.0325116  | 82.33387518 |
| 2730 | 2730 | 3 | 0 | 14.14590221 | 14.77017982 | 82.33387518 |
| 2731 | 2731 | 3 | 0 | 9.430601469 | 16.50784802 | 82.33387518 |
| 2732 | 2732 | 3 | 0 | 23.57650368 | 16.50784802 | 82.33387518 |
| 2733 | 2733 | 3 | 0 | 4.715300733 | 18.24551624 | 82.33387518 |
| 2734 | 2734 | 3 | 0 | 0           | 19.98318446 | 82.33387518 |
| 2735 | 2735 | 3 | 0 | 18.86120294 | 18.24551624 | 82.33387518 |
| 2736 | 2736 | 3 | 0 | 14.14590221 | 19.98318446 | 82.33387518 |
| 2737 | 2737 | 3 | 0 | 9.430601469 | 21.72085266 | 82.33387518 |
| 2738 | 2738 | 3 | 0 | 23.57650368 | 21.72085266 | 82.33387518 |
| 2739 | 2739 | 3 | 0 | 4.715300733 | 23.45852088 | 82.33387518 |
| 2740 | 2740 | 3 | 0 | 0           | 25.19618909 | 82.33387518 |
| 2741 | 2741 | 3 | 0 | 18.86120294 | 23.45852088 | 82.33387518 |
| 2742 | 2742 | 3 | 0 | 14.14590221 | 25.19618909 | 82.33387518 |
| 2743 | 2743 | 3 | 0 | 9.430601469 | 26.9338573  | 82.33387518 |
| 2744 | 2744 | 3 | 0 | 23.57650368 | 26.9338573  | 82.33387518 |
| 2745 | 2745 | 3 | 0 | 4.715300733 | 28.67152552 | 82.33387518 |
| 2746 | 2746 | 3 | 0 | 0           | 30.40919373 | 82.33387518 |
| 2747 | 2747 | 3 | 0 | 18.86120294 | 28.67152552 | 82.33387518 |
| 2748 | 2748 | 3 | 0 | 14.14590221 | 30.40919373 | 82.33387518 |
| 2749 | 2749 | 3 | 0 | 4.715300733 | 0           | 83.75057372 |
| 2750 | 2750 | 3 | 0 | 0           | 1.73766822  | 83.75057372 |
| 2751 | 2751 | 3 | 0 | 18.86120294 | 0           | 83.75057372 |
| 2752 | 2752 | 3 | 0 | 14.14590221 | 1.73766822  | 83.75057372 |
| 2753 | 2753 | 3 | 0 | 9.430601469 | 3.475336426 | 83.75057372 |
| 2754 | 2754 | 3 | 0 | 23.57650368 | 3.475336426 | 83.75057372 |
| 2755 | 2755 | 3 | 0 | 4.715300733 | 5.213004642 | 83.75057372 |

|      |      |   |   |             |             |             |
|------|------|---|---|-------------|-------------|-------------|
| 2756 | 2756 | 3 | 0 | 0           | 6.950672859 | 83.75057372 |
| 2757 | 2757 | 3 | 0 | 18.86120294 | 5.213004642 | 83.75057372 |
| 2758 | 2758 | 3 | 0 | 14.14590221 | 6.950672859 | 83.75057372 |
| 2759 | 2759 | 3 | 0 | 9.430601469 | 8.688341064 | 83.75057372 |
| 2760 | 2760 | 3 | 0 | 23.57650368 | 8.688341064 | 83.75057372 |
| 2761 | 2761 | 3 | 0 | 4.715300733 | 10.42600928 | 83.75057372 |
| 2762 | 2762 | 3 | 0 | 0           | 12.1636775  | 83.75057372 |
| 2763 | 2763 | 3 | 0 | 18.86120294 | 10.42600928 | 83.75057372 |
| 2764 | 2764 | 3 | 0 | 14.14590221 | 12.1636775  | 83.75057372 |
| 2765 | 2765 | 3 | 0 | 9.430601469 | 13.9013457  | 83.75057372 |
| 2766 | 2766 | 3 | 0 | 23.57650368 | 13.9013457  | 83.75057372 |
| 2767 | 2767 | 3 | 0 | 4.715300733 | 15.63901392 | 83.75057372 |
| 2768 | 2768 | 3 | 0 | 0           | 17.37668214 | 83.75057372 |
| 2769 | 2769 | 3 | 0 | 18.86120294 | 15.63901392 | 83.75057372 |
| 2770 | 2770 | 3 | 0 | 14.14590221 | 17.37668214 | 83.75057372 |
| 2771 | 2771 | 3 | 0 | 9.430601469 | 19.11435034 | 83.75057372 |
| 2772 | 2772 | 3 | 0 | 23.57650368 | 19.11435034 | 83.75057372 |
| 2773 | 2773 | 3 | 0 | 4.715300733 | 20.85201856 | 83.75057372 |
| 2774 | 2774 | 3 | 0 | 0           | 22.58968677 | 83.75057372 |
| 2775 | 2775 | 3 | 0 | 18.86120294 | 20.85201856 | 83.75057372 |
| 2776 | 2776 | 3 | 0 | 14.14590221 | 22.58968677 | 83.75057372 |
| 2777 | 2777 | 3 | 0 | 9.430601469 | 24.32735498 | 83.75057372 |
| 2778 | 2778 | 3 | 0 | 23.57650368 | 24.32735498 | 83.75057372 |
| 2779 | 2779 | 3 | 0 | 4.715300733 | 26.0650232  | 83.75057372 |
| 2780 | 2780 | 3 | 0 | 0           | 27.80269141 | 83.75057372 |
| 2781 | 2781 | 3 | 0 | 18.86120294 | 26.0650232  | 83.75057372 |
| 2782 | 2782 | 3 | 0 | 14.14590221 | 27.80269141 | 83.75057372 |
| 2783 | 2783 | 3 | 0 | 9.430601469 | 29.54035962 | 83.75057372 |
| 2784 | 2784 | 3 | 0 | 23.57650368 | 29.54035962 | 83.75057372 |
| 2785 | 2785 | 3 | 0 | 9.430601469 | 0.86883411  | 85.16727226 |
| 2786 | 2786 | 3 | 0 | 23.57650368 | 0.86883411  | 85.16727226 |
| 2787 | 2787 | 3 | 0 | 4.715300733 | 2.60650232  | 85.16727226 |
| 2788 | 2788 | 3 | 0 | 0           | 4.34417054  | 85.16727226 |
| 2789 | 2789 | 3 | 0 | 18.86120294 | 2.60650232  | 85.16727226 |
| 2790 | 2790 | 3 | 0 | 14.14590221 | 4.34417054  | 85.16727226 |
| 2791 | 2791 | 3 | 0 | 9.430601469 | 6.081838745 | 85.16727226 |
| 2792 | 2792 | 3 | 0 | 23.57650368 | 6.081838745 | 85.16727226 |
| 2793 | 2793 | 3 | 0 | 4.715300733 | 7.819506962 | 85.16727226 |
| 2794 | 2794 | 3 | 0 | 0           | 9.557175178 | 85.16727226 |
| 2795 | 2795 | 3 | 0 | 18.86120294 | 7.819506962 | 85.16727226 |
| 2796 | 2796 | 3 | 0 | 14.14590221 | 9.557175178 | 85.16727226 |
| 2797 | 2797 | 3 | 0 | 9.430601469 | 11.29484338 | 85.16727226 |
| 2798 | 2798 | 3 | 0 | 23.57650368 | 11.29484338 | 85.16727226 |
| 2799 | 2799 | 3 | 0 | 4.715300733 | 13.0325116  | 85.16727226 |
| 2800 | 2800 | 3 | 0 | 0           | 14.77017982 | 85.16727226 |
| 2801 | 2801 | 3 | 0 | 18.86120294 | 13.0325116  | 85.16727226 |
| 2802 | 2802 | 3 | 0 | 14.14590221 | 14.77017982 | 85.16727226 |
| 2803 | 2803 | 3 | 0 | 9.430601469 | 16.50784802 | 85.16727226 |
| 2804 | 2804 | 3 | 0 | 23.57650368 | 16.50784802 | 85.16727226 |
| 2805 | 2805 | 3 | 0 | 4.715300733 | 18.24551624 | 85.16727226 |
| 2806 | 2806 | 3 | 0 | 0           | 19.98318446 | 85.16727226 |



|      |      |   |   |             |             |             |
|------|------|---|---|-------------|-------------|-------------|
| 2807 | 2807 | 3 | 0 | 18.86120294 | 18.24551624 | 85.16727226 |
| 2808 | 2808 | 3 | 0 | 14.14590221 | 19.98318446 | 85.16727226 |
| 2809 | 2809 | 3 | 0 | 9.430601469 | 21.72085266 | 85.16727226 |
| 2810 | 2810 | 3 | 0 | 23.57650368 | 21.72085266 | 85.16727226 |
| 2811 | 2811 | 3 | 0 | 4.715300733 | 23.45852088 | 85.16727226 |
| 2812 | 2812 | 3 | 0 | 0           | 25.19618909 | 85.16727226 |
| 2813 | 2813 | 3 | 0 | 18.86120294 | 23.45852088 | 85.16727226 |
| 2814 | 2814 | 3 | 0 | 14.14590221 | 25.19618909 | 85.16727226 |
| 2815 | 2815 | 3 | 0 | 9.430601469 | 26.9338573  | 85.16727226 |
| 2816 | 2816 | 3 | 0 | 23.57650368 | 26.9338573  | 85.16727226 |
| 2817 | 2817 | 3 | 0 | 4.715300733 | 28.67152552 | 85.16727226 |
| 2818 | 2818 | 3 | 0 | 0           | 30.40919373 | 85.16727226 |
| 2819 | 2819 | 3 | 0 | 18.86120294 | 28.67152552 | 85.16727226 |
| 2820 | 2820 | 3 | 0 | 14.14590221 | 30.40919373 | 85.16727226 |
| 2821 | 2821 | 4 | 0 | 0.21124544  | 1.954875    | 40.01379293 |
| 2822 | 2822 | 4 | 0 | 3.21790933  | 1.954875    | 51.36976137 |
| 2823 | 2823 | 4 | 0 | 0.62204238  | 1.954875    | 5.94446259  |
| 2824 | 2824 | 4 | 0 | 3.62861196  | 1.954875    | 17.30114354 |
| 2825 | 2825 | 4 | 0 | 6.63527585  | 1.954875    | 28.65711198 |
| 2826 | 2826 | 4 | 0 | 2.00928364  | 1.954875    | 26.33362013 |
| 2827 | 2827 | 4 | 0 | 5.01585322  | 1.954875    | 37.69030108 |
| 2828 | 2828 | 4 | 0 | 8.02251711  | 1.954875    | 49.04626952 |
| 2829 | 2829 | 4 | 0 | 5.42665016  | 1.954875    | 3.62097074  |
| 2830 | 2830 | 4 | 0 | 8.43321974  | 1.954875    | 14.97765169 |
| 2831 | 2831 | 4 | 0 | 2.70771387  | 5.864625    | 46.51828759 |
| 2832 | 2832 | 4 | 0 | 0.11184692  | 5.864625    | 1.09298881  |
| 2833 | 2833 | 4 | 0 | 3.1184165   | 5.864625    | 12.44895725 |
| 2834 | 2834 | 4 | 0 | 6.12508039  | 5.864625    | 23.8056382  |
| 2835 | 2835 | 4 | 0 | 9.13164998  | 5.864625    | 35.16160664 |
| 2836 | 2836 | 4 | 0 | 0.72643912  | 5.864625    | 55.13537144 |
| 2837 | 2837 | 4 | 0 | 1.13723605  | 5.864625    | 21.0667536  |
| 2838 | 2838 | 4 | 0 | 4.14380564  | 5.864625    | 32.42272205 |
| 2839 | 2839 | 4 | 0 | 7.15046953  | 5.864625    | 43.779403   |
| 2840 | 2840 | 4 | 0 | 7.56117216  | 5.864625    | 9.71007265  |
| 2841 | 2841 | 4 | 0 | 0.21124544  | 9.774375    | 40.01379293 |
| 2842 | 2842 | 4 | 0 | 3.21790933  | 9.774375    | 51.36976137 |
| 2843 | 2843 | 4 | 0 | 0.62204238  | 9.774375    | 5.94446259  |
| 2844 | 2844 | 4 | 0 | 3.62861196  | 9.774375    | 17.30114354 |
| 2845 | 2845 | 4 | 0 | 6.63527585  | 9.774375    | 28.65711198 |
| 2846 | 2846 | 4 | 0 | 2.00928364  | 9.774375    | 26.33362013 |
| 2847 | 2847 | 4 | 0 | 5.01585322  | 9.774375    | 37.69030108 |
| 2848 | 2848 | 4 | 0 | 8.02251711  | 9.774375    | 49.04626952 |
| 2849 | 2849 | 4 | 0 | 5.42665016  | 9.774375    | 3.62097074  |
| 2850 | 2850 | 4 | 0 | 8.43321974  | 9.774375    | 14.97765169 |
| 2851 | 2851 | 4 | 0 | 2.70771387  | 13.684125   | 46.51828759 |
| 2852 | 2852 | 4 | 0 | 0.11184692  | 13.684125   | 1.09298881  |
| 2853 | 2853 | 4 | 0 | 3.1184165   | 13.684125   | 12.44895725 |
| 2854 | 2854 | 4 | 0 | 6.12508039  | 13.684125   | 23.8056382  |
| 2855 | 2855 | 4 | 0 | 9.13164998  | 13.684125   | 35.16160664 |
| 2856 | 2856 | 4 | 0 | 0.72643912  | 13.684125   | 55.13537144 |
| 2857 | 2857 | 4 | 0 | 1.13723605  | 13.684125   | 21.0667536  |

|      |      |   |   |                    |                      |
|------|------|---|---|--------------------|----------------------|
| 2858 | 2858 | 4 | 0 | 4.14380564         | 13.68412532.42272205 |
| 2859 | 2859 | 4 | 0 | 7.15046953         | 13.68412543.779403   |
| 2860 | 2860 | 4 | 0 | 7.56117216         | 13.6841259.71007265  |
| 2861 | 2861 | 4 | 0 | 0.21124544         | 17.59387540.01379293 |
| 2862 | 2862 | 4 | 0 | 3.21790933         | 17.59387551.36976137 |
| 2863 | 2863 | 4 | 0 | 0.62204238         | 17.5938755.94446259  |
| 2864 | 2864 | 4 | 0 | 3.62861196         | 17.59387517.30114354 |
| 2865 | 2865 | 4 | 0 | 6.63527585         | 17.59387528.65711198 |
| 2866 | 2866 | 4 | 0 | 2.00928364         | 17.59387526.33362013 |
| 2867 | 2867 | 4 | 0 | 5.01585322         | 17.59387537.69030108 |
| 2868 | 2868 | 4 | 0 | 8.02251711         | 17.59387549.04626952 |
| 2869 | 2869 | 4 | 0 | 5.42665016         | 17.5938753.62097074  |
| 2870 | 2870 | 4 | 0 | 8.43321974         | 17.59387514.97765169 |
| 2871 | 2871 | 4 | 0 | 2.70771387         | 21.50362546.51828759 |
| 2872 | 2872 | 4 | 0 | 0.11184692         | 21.5036251.09298881  |
| 2873 | 2873 | 4 | 0 | 3.118416521.503625 | 12.44895725          |
| 2874 | 2874 | 4 | 0 | 6.12508039         | 21.50362523.8056382  |
| 2875 | 2875 | 4 | 0 | 9.13164998         | 21.50362535.16160664 |
| 2876 | 2876 | 4 | 0 | 0.72643912         | 21.50362555.13537144 |
| 2877 | 2877 | 4 | 0 | 1.13723605         | 21.50362521.0667536  |
| 2878 | 2878 | 4 | 0 | 4.14380564         | 21.50362532.42272205 |
| 2879 | 2879 | 4 | 0 | 7.15046953         | 21.50362543.779403   |
| 2880 | 2880 | 4 | 0 | 7.56117216         | 21.5036259.71007265  |
| 2881 | 2881 | 4 | 0 | 0.21124544         | 25.41337540.01379293 |
| 2882 | 2882 | 4 | 0 | 3.21790933         | 25.41337551.36976137 |
| 2883 | 2883 | 4 | 0 | 0.62204238         | 25.4133755.94446259  |
| 2884 | 2884 | 4 | 0 | 3.62861196         | 25.41337517.30114354 |
| 2885 | 2885 | 4 | 0 | 6.63527585         | 25.41337528.65711198 |
| 2886 | 2886 | 4 | 0 | 2.00928364         | 25.41337526.33362013 |
| 2887 | 2887 | 4 | 0 | 5.01585322         | 25.41337537.69030108 |
| 2888 | 2888 | 4 | 0 | 8.02251711         | 25.41337549.04626952 |
| 2889 | 2889 | 4 | 0 | 5.42665016         | 25.4133753.62097074  |
| 2890 | 2890 | 4 | 0 | 8.43321974         | 25.41337514.97765169 |
| 2891 | 2891 | 4 | 0 | 2.70771387         | 29.32312546.51828759 |
| 2892 | 2892 | 4 | 0 | 0.11184692         | 29.3231251.09298881  |
| 2893 | 2893 | 4 | 0 | 3.118416529.323125 | 12.44895725          |
| 2894 | 2894 | 4 | 0 | 6.12508039         | 29.32312523.8056382  |
| 2895 | 2895 | 4 | 0 | 9.13164998         | 29.32312535.16160664 |
| 2896 | 2896 | 4 | 0 | 0.72643912         | 29.32312555.13537144 |
| 2897 | 2897 | 4 | 0 | 1.13723605         | 29.32312521.0667536  |
| 2898 | 2898 | 4 | 0 | 4.14380564         | 29.32312532.42272205 |
| 2899 | 2899 | 4 | 0 | 7.15046953         | 29.32312543.779403   |
| 2900 | 2900 | 4 | 0 | 7.56117216         | 29.3231259.71007265  |
| 2901 | 2901 | 4 | 0 | 9.64184544         | 1.954875 40.01379293 |
| 2902 | 2902 | 4 | 0 | 12.64850933        | 1.954875 51.36976137 |
| 2903 | 2903 | 4 | 0 | 10.05264238        | 1.954875 5.94446259  |
| 2904 | 2904 | 4 | 0 | 13.05921196        | 1.954875 17.30114354 |
| 2905 | 2905 | 4 | 0 | 16.06587585        | 1.954875 28.65711198 |
| 2906 | 2906 | 4 | 0 | 11.43988364        | 1.954875 26.33362013 |
| 2907 | 2907 | 4 | 0 | 14.44645322        | 1.954875 37.69030108 |
| 2908 | 2908 | 4 | 0 | 17.45311711        | 1.954875 49.04626952 |

|      |      |   |   |             |           |             |
|------|------|---|---|-------------|-----------|-------------|
| 2909 | 2909 | 4 | 0 | 14.85725016 | 1.954875  | 3.62097074  |
| 2910 | 2910 | 4 | 0 | 17.86381974 | 1.954875  | 14.97765169 |
| 2911 | 2911 | 4 | 0 | 12.13831387 | 5.864625  | 46.51828759 |
| 2912 | 2912 | 4 | 0 | 9.54244692  | 5.864625  | 1.09298881  |
| 2913 | 2913 | 4 | 0 | 12.5490165  | 5.864625  | 12.44895725 |
| 2914 | 2914 | 4 | 0 | 15.55568039 | 5.864625  | 23.8056382  |
| 2915 | 2915 | 4 | 0 | 18.56224998 | 5.864625  | 35.16160664 |
| 2916 | 2916 | 4 | 0 | 10.15703912 | 5.864625  | 55.13537144 |
| 2917 | 2917 | 4 | 0 | 10.56783605 | 5.864625  | 21.0667536  |
| 2918 | 2918 | 4 | 0 | 13.57440564 | 5.864625  | 32.42272205 |
| 2919 | 2919 | 4 | 0 | 16.58106953 | 5.864625  | 43.779403   |
| 2920 | 2920 | 4 | 0 | 16.99177216 | 5.864625  | 9.71007265  |
| 2921 | 2921 | 4 | 0 | 9.64184544  | 9.774375  | 40.01379293 |
| 2922 | 2922 | 4 | 0 | 12.64850933 | 9.774375  | 51.36976137 |
| 2923 | 2923 | 4 | 0 | 10.05264238 | 9.774375  | 5.94446259  |
| 2924 | 2924 | 4 | 0 | 13.05921196 | 9.774375  | 17.30114354 |
| 2925 | 2925 | 4 | 0 | 16.06587585 | 9.774375  | 28.65711198 |
| 2926 | 2926 | 4 | 0 | 11.43988364 | 9.774375  | 26.33362013 |
| 2927 | 2927 | 4 | 0 | 14.44645322 | 9.774375  | 37.69030108 |
| 2928 | 2928 | 4 | 0 | 17.45311711 | 9.774375  | 49.04626952 |
| 2929 | 2929 | 4 | 0 | 14.85725016 | 9.774375  | 3.62097074  |
| 2930 | 2930 | 4 | 0 | 17.86381974 | 9.774375  | 14.97765169 |
| 2931 | 2931 | 4 | 0 | 12.13831387 | 13.684125 | 46.51828759 |
| 2932 | 2932 | 4 | 0 | 9.54244692  | 13.684125 | 1.09298881  |
| 2933 | 2933 | 4 | 0 | 12.5490165  | 13.684125 | 12.44895725 |
| 2934 | 2934 | 4 | 0 | 15.55568039 | 13.684125 | 23.8056382  |
| 2935 | 2935 | 4 | 0 | 18.56224998 | 13.684125 | 35.16160664 |
| 2936 | 2936 | 4 | 0 | 10.15703912 | 13.684125 | 55.13537144 |
| 2937 | 2937 | 4 | 0 | 10.56783605 | 13.684125 | 21.0667536  |
| 2938 | 2938 | 4 | 0 | 13.57440564 | 13.684125 | 32.42272205 |
| 2939 | 2939 | 4 | 0 | 16.58106953 | 13.684125 | 43.779403   |
| 2940 | 2940 | 4 | 0 | 16.99177216 | 13.684125 | 9.71007265  |
| 2941 | 2941 | 4 | 0 | 9.64184544  | 17.593875 | 40.01379293 |
| 2942 | 2942 | 4 | 0 | 12.64850933 | 17.593875 | 51.36976137 |
| 2943 | 2943 | 4 | 0 | 10.05264238 | 17.593875 | 5.94446259  |
| 2944 | 2944 | 4 | 0 | 13.05921196 | 17.593875 | 17.30114354 |
| 2945 | 2945 | 4 | 0 | 16.06587585 | 17.593875 | 28.65711198 |
| 2946 | 2946 | 4 | 0 | 11.43988364 | 17.593875 | 26.33362013 |
| 2947 | 2947 | 4 | 0 | 14.44645322 | 17.593875 | 37.69030108 |
| 2948 | 2948 | 4 | 0 | 17.45311711 | 17.593875 | 49.04626952 |
| 2949 | 2949 | 4 | 0 | 14.85725016 | 17.593875 | 3.62097074  |
| 2950 | 2950 | 4 | 0 | 17.86381974 | 17.593875 | 14.97765169 |
| 2951 | 2951 | 4 | 0 | 12.13831387 | 21.503625 | 46.51828759 |
| 2952 | 2952 | 4 | 0 | 9.54244692  | 21.503625 | 1.09298881  |
| 2953 | 2953 | 4 | 0 | 12.5490165  | 21.503625 | 12.44895725 |
| 2954 | 2954 | 4 | 0 | 15.55568039 | 21.503625 | 23.8056382  |
| 2955 | 2955 | 4 | 0 | 18.56224998 | 21.503625 | 35.16160664 |
| 2956 | 2956 | 4 | 0 | 10.15703912 | 21.503625 | 55.13537144 |
| 2957 | 2957 | 4 | 0 | 10.56783605 | 21.503625 | 21.0667536  |
| 2958 | 2958 | 4 | 0 | 13.57440564 | 21.503625 | 32.42272205 |
| 2959 | 2959 | 4 | 0 | 16.58106953 | 21.503625 | 43.779403   |

|      |      |   |   |             |                      |
|------|------|---|---|-------------|----------------------|
| 2960 | 2960 | 4 | 0 | 16.99177216 | 21.5036259.71007265  |
| 2961 | 2961 | 4 | 0 | 9.64184544  | 25.41337540.01379293 |
| 2962 | 2962 | 4 | 0 | 12.64850933 | 25.41337551.36976137 |
| 2963 | 2963 | 4 | 0 | 10.05264238 | 25.4133755.94446259  |
| 2964 | 2964 | 4 | 0 | 13.05921196 | 25.41337517.30114354 |
| 2965 | 2965 | 4 | 0 | 16.06587585 | 25.41337528.65711198 |
| 2966 | 2966 | 4 | 0 | 11.43988364 | 25.41337526.33362013 |
| 2967 | 2967 | 4 | 0 | 14.44645322 | 25.41337537.69030108 |
| 2968 | 2968 | 4 | 0 | 17.45311711 | 25.41337549.04626952 |
| 2969 | 2969 | 4 | 0 | 14.85725016 | 25.4133753.62097074  |
| 2970 | 2970 | 4 | 0 | 17.86381974 | 25.41337514.97765169 |
| 2971 | 2971 | 4 | 0 | 12.13831387 | 29.32312546.51828759 |
| 2972 | 2972 | 4 | 0 | 9.54244692  | 29.3231251.09298881  |
| 2973 | 2973 | 4 | 0 | 12.5490165  | 29.32312512.44895725 |
| 2974 | 2974 | 4 | 0 | 15.55568039 | 29.32312523.8056382  |
| 2975 | 2975 | 4 | 0 | 18.56224998 | 29.32312535.16160664 |
| 2976 | 2976 | 4 | 0 | 10.15703912 | 29.32312555.13537144 |
| 2977 | 2977 | 4 | 0 | 10.56783605 | 29.32312521.0667536  |
| 2978 | 2978 | 4 | 0 | 13.57440564 | 29.32312532.42272205 |
| 2979 | 2979 | 4 | 0 | 16.58106953 | 29.32312543.779403   |
| 2980 | 2980 | 4 | 0 | 16.99177216 | 29.3231259.71007265  |
| 2981 | 2981 | 4 | 0 | 19.07244544 | 1.954875 40.01379293 |
| 2982 | 2982 | 4 | 0 | 22.07910933 | 1.954875 51.36976137 |
| 2983 | 2983 | 4 | 0 | 19.48324238 | 1.954875 5.94446259  |
| 2984 | 2984 | 4 | 0 | 22.48981196 | 1.954875 17.30114354 |
| 2985 | 2985 | 4 | 0 | 25.49647585 | 1.954875 28.65711198 |
| 2986 | 2986 | 4 | 0 | 20.87048364 | 1.954875 26.33362013 |
| 2987 | 2987 | 4 | 0 | 23.87705322 | 1.954875 37.69030108 |
| 2988 | 2988 | 4 | 0 | 26.88371711 | 1.954875 49.04626952 |
| 2989 | 2989 | 4 | 0 | 24.28785016 | 1.954875 3.62097074  |
| 2990 | 2990 | 4 | 0 | 27.29441974 | 1.954875 14.97765169 |
| 2991 | 2991 | 4 | 0 | 21.56891387 | 5.864625 46.51828759 |
| 2992 | 2992 | 4 | 0 | 18.97304692 | 5.864625 1.09298881  |
| 2993 | 2993 | 4 | 0 | 21.9796165  | 5.864625 12.44895725 |
| 2994 | 2994 | 4 | 0 | 24.98628039 | 5.864625 23.8056382  |
| 2995 | 2995 | 4 | 0 | 27.99284998 | 5.864625 35.16160664 |
| 2996 | 2996 | 4 | 0 | 19.58763912 | 5.864625 55.13537144 |
| 2997 | 2997 | 4 | 0 | 19.99843605 | 5.864625 21.0667536  |
| 2998 | 2998 | 4 | 0 | 23.00500564 | 5.864625 32.42272205 |
| 2999 | 2999 | 4 | 0 | 26.01166953 | 5.864625 43.779403   |
| 3000 | 3000 | 4 | 0 | 26.42237216 | 5.864625 9.71007265  |
| 3001 | 3001 | 4 | 0 | 19.07244544 | 9.774375 40.01379293 |
| 3002 | 3002 | 4 | 0 | 22.07910933 | 9.774375 51.36976137 |
| 3003 | 3003 | 4 | 0 | 19.48324238 | 9.774375 5.94446259  |
| 3004 | 3004 | 4 | 0 | 22.48981196 | 9.774375 17.30114354 |
| 3005 | 3005 | 4 | 0 | 25.49647585 | 9.774375 28.65711198 |
| 3006 | 3006 | 4 | 0 | 20.87048364 | 9.774375 26.33362013 |
| 3007 | 3007 | 4 | 0 | 23.87705322 | 9.774375 37.69030108 |
| 3008 | 3008 | 4 | 0 | 26.88371711 | 9.774375 49.04626952 |
| 3009 | 3009 | 4 | 0 | 24.28785016 | 9.774375 3.62097074  |
| 3010 | 3010 | 4 | 0 | 27.29441974 | 9.774375 14.97765169 |

|      |      |   |   |             |                       |
|------|------|---|---|-------------|-----------------------|
| 3011 | 3011 | 4 | 0 | 21.56891387 | 13.68412546.51828759  |
| 3012 | 3012 | 4 | 0 | 18.97304692 | 13.6841251.09298881   |
| 3013 | 3013 | 4 | 0 | 21.9796165  | 13.68412512.44895725  |
| 3014 | 3014 | 4 | 0 | 24.98628039 | 13.68412523.8056382   |
| 3015 | 3015 | 4 | 0 | 27.99284998 | 13.68412535.16160664  |
| 3016 | 3016 | 4 | 0 | 19.58763912 | 13.68412555.13537144  |
| 3017 | 3017 | 4 | 0 | 19.99843605 | 13.68412521.0667536   |
| 3018 | 3018 | 4 | 0 | 23.00500564 | 13.68412532.42272205  |
| 3019 | 3019 | 4 | 0 | 26.01166953 | 13.68412543.779403    |
| 3020 | 3020 | 4 | 0 | 26.42237216 | 13.6841259.71007265   |
| 3021 | 3021 | 4 | 0 | 19.07244544 | 17.59387540.01379293  |
| 3022 | 3022 | 4 | 0 | 22.07910933 | 17.59387551.36976137  |
| 3023 | 3023 | 4 | 0 | 19.48324238 | 17.5938755.94446259   |
| 3024 | 3024 | 4 | 0 | 22.48981196 | 17.59387517.30114354  |
| 3025 | 3025 | 4 | 0 | 25.49647585 | 17.59387528.65711198  |
| 3026 | 3026 | 4 | 0 | 20.87048364 | 17.59387526.33362013  |
| 3027 | 3027 | 4 | 0 | 23.87705322 | 17.59387537.69030108  |
| 3028 | 3028 | 4 | 0 | 26.88371711 | 17.59387549.04626952  |
| 3029 | 3029 | 4 | 0 | 24.28785016 | 17.5938753.62097074   |
| 3030 | 3030 | 4 | 0 | 27.29441974 | 17.59387514.97765169  |
| 3031 | 3031 | 4 | 0 | 21.56891387 | 21.50362546.51828759  |
| 3032 | 3032 | 4 | 0 | 18.97304692 | 21.5036251.09298881   |
| 3033 | 3033 | 4 | 0 | 21.9796165  | 21.50362512.44895725  |
| 3034 | 3034 | 4 | 0 | 24.98628039 | 21.50362523.8056382   |
| 3035 | 3035 | 4 | 0 | 27.99284998 | 21.50362535.16160664  |
| 3036 | 3036 | 4 | 0 | 19.58763912 | 21.50362555.13537144  |
| 3037 | 3037 | 4 | 0 | 19.99843605 | 21.50362521.0667536   |
| 3038 | 3038 | 4 | 0 | 23.00500564 | 21.50362532.42272205  |
| 3039 | 3039 | 4 | 0 | 26.01166953 | 21.50362543.779403    |
| 3040 | 3040 | 4 | 0 | 26.42237216 | 21.5036259.71007265   |
| 3041 | 3041 | 4 | 0 | 19.07244544 | 25.41337540.01379293  |
| 3042 | 3042 | 4 | 0 | 22.07910933 | 25.41337551.36976137  |
| 3043 | 3043 | 4 | 0 | 19.48324238 | 25.4133755.94446259   |
| 3044 | 3044 | 4 | 0 | 22.48981196 | 25.41337517.30114354  |
| 3045 | 3045 | 4 | 0 | 25.49647585 | 25.41337528.65711198  |
| 3046 | 3046 | 4 | 0 | 20.87048364 | 25.41337526.33362013  |
| 3047 | 3047 | 4 | 0 | 23.87705322 | 25.41337537.69030108  |
| 3048 | 3048 | 4 | 0 | 26.88371711 | 25.41337549.04626952  |
| 3049 | 3049 | 4 | 0 | 24.28785016 | 25.4133753.62097074   |
| 3050 | 3050 | 4 | 0 | 27.29441974 | 25.41337514.97765169  |
| 3051 | 3051 | 4 | 0 | 21.56891387 | 29.32312546.51828759  |
| 3052 | 3052 | 4 | 0 | 18.97304692 | 29.3231251.09298881   |
| 3053 | 3053 | 4 | 0 | 21.9796165  | 29.32312512.44895725  |
| 3054 | 3054 | 4 | 0 | 24.98628039 | 29.32312523.8056382   |
| 3055 | 3055 | 4 | 0 | 27.99284998 | 29.32312535.16160664  |
| 3056 | 3056 | 4 | 0 | 19.58763912 | 29.32312555.13537144  |
| 3057 | 3057 | 4 | 0 | 19.99843605 | 29.32312521.0667536   |
| 3058 | 3058 | 4 | 0 | 23.00500564 | 29.32312532.42272205  |
| 3059 | 3059 | 4 | 0 | 26.01166953 | 29.32312543.779403    |
| 3060 | 3060 | 4 | 0 | 26.42237216 | 29.3231259.71007265   |
| 3061 | 2821 | 5 | 0 | 0.19757107  | 3.69526112 38.9343418 |

|      |      |   |   |            |            |             |
|------|------|---|---|------------|------------|-------------|
| 3062 | 2822 | 5 | 0 | 3.20423496 | 3.69526112 | 50.29102275 |
| 3063 | 2823 | 5 | 0 | 0.60836801 | 3.69526111 | 4.86572396  |
| 3064 | 2824 | 5 | 0 | 3.61493759 | 3.69526111 | 16.2216924  |
| 3065 | 2825 | 5 | 0 | 6.62160148 | 3.69526111 | 27.57837335 |
| 3066 | 2826 | 5 | 0 | 2.06181208 | 3.64521631 | 27.45368428 |
| 3067 | 2827 | 5 | 0 | 5.06838166 | 3.64521631 | 38.81036523 |
| 3068 | 2828 | 5 | 0 | 8.07504556 | 3.64521631 | 50.16633367 |
| 3069 | 2829 | 5 | 0 | 5.47917863 | 3.64521631 | 4.74103489  |
| 3070 | 2830 | 5 | 0 | 8.48574819 | 3.64521631 | 16.09771584 |
| 3071 | 2836 | 5 | 0 | 1.23540864 | 4.17279798 | 56.25116053 |
| 3072 | 2837 | 5 | 0 | 1.64620554 | 4.17279798 | 22.18183019 |
| 3073 | 2838 | 5 | 0 | 4.65277512 | 4.17279798 | 33.53851114 |
| 3074 | 2839 | 5 | 0 | 7.65943901 | 4.17279798 | 44.89447958 |
| 3075 | 2840 | 5 | 0 | 8.07014164 | 4.17279798 | 10.82586175 |
| 3076 | 2831 | 5 | 0 | 2.51353782 | 7.60618404 | 45.42529879 |
| 3077 | 2912 | 5 | 0 | 9.34827086 | 7.60618404 | 0           |
| 3078 | 2833 | 5 | 0 | 2.92433475 | 7.60618404 | 11.35668095 |
| 3079 | 2834 | 5 | 0 | 5.93090434 | 7.60618404 | 22.71264939 |
| 3080 | 2835 | 5 | 0 | 8.93756823 | 7.60618404 | 34.06933034 |
| 3081 | 2821 | 5 | 0 | 0.19757107 | 0.21448888 | 38.9343418  |
| 3082 | 2822 | 5 | 0 | 3.20423496 | 0.21448889 | 50.29102275 |
| 3083 | 2823 | 5 | 0 | 0.60836801 | 0.21448888 | 4.86572396  |
| 3084 | 2824 | 5 | 0 | 3.61493759 | 0.21448888 | 16.2216924  |
| 3085 | 2825 | 5 | 0 | 6.62160148 | 0.21448888 | 27.57837335 |
| 3086 | 2826 | 5 | 0 | 2.06181208 | 0.26453369 | 27.45368428 |
| 3087 | 2827 | 5 | 0 | 5.06838166 | 0.26453369 | 38.81036523 |
| 3088 | 2828 | 5 | 0 | 8.07504556 | 0.26453369 | 50.16633367 |
| 3089 | 2829 | 5 | 0 | 5.47917860 | 0.26453368 | 4.74103489  |
| 3090 | 2830 | 5 | 0 | 8.48574819 | 0.26453369 | 16.09771584 |
| 3091 | 2836 | 5 | 0 | 1.23540867 | 7.55645202 | 56.25116053 |
| 3092 | 2837 | 5 | 0 | 1.64620554 | 7.55645202 | 22.18183019 |
| 3093 | 2838 | 5 | 0 | 4.65277512 | 7.55645202 | 33.53851114 |
| 3094 | 2839 | 5 | 0 | 7.65943901 | 7.55645202 | 44.89447958 |
| 3095 | 2840 | 5 | 0 | 8.07014164 | 7.55645202 | 10.82586175 |
| 3096 | 2831 | 5 | 0 | 2.51353782 | 4.12306596 | 45.42529879 |
| 3097 | 2912 | 5 | 0 | 9.34827086 | 4.12306596 | 0           |
| 3098 | 2833 | 5 | 0 | 2.92433475 | 4.12306596 | 11.35668095 |
| 3099 | 2834 | 5 | 0 | 5.93090434 | 4.12306596 | 22.71264939 |
| 3100 | 2835 | 5 | 0 | 8.93756823 | 4.12306596 | 34.06933034 |
| 3101 | 2821 | 5 | 0 | 1.95675519 | 1.954875   | 41.10820675 |
| 3102 | 2822 | 5 | 0 | 4.96341909 | 1.954875   | 52.46488771 |
| 3103 | 2823 | 5 | 0 | 2.36755213 | 1.954875   | 7.03887641  |
| 3104 | 2824 | 5 | 0 | 5.37412172 | 1.954875   | 18.39555736 |
| 3105 | 2825 | 5 | 0 | 8.38078561 | 1.954875   | 29.75223831 |
| 3106 | 2901 | 5 | 0 | 8.07693168 | 1.954875   | 41.3411972  |
| 3107 | 2822 | 5 | 0 | 1.65299557 | 1.954875   | 52.69787815 |
| 3108 | 2903 | 5 | 0 | 8.48772861 | 1.954875   | 7.27257936  |
| 3109 | 2824 | 5 | 0 | 2.06369821 | 1.954875   | 18.6285478  |
| 3110 | 2825 | 5 | 0 | 5.07036209 | 1.954875   | 29.98522876 |
| 3111 | 2826 | 5 | 0 | 3.56118317 | 1.954875   | 24.99267819 |
| 3112 | 2827 | 5 | 0 | 6.56784706 | 1.954875   | 36.34864663 |

|      |      |   |   |            |             |             |
|------|------|---|---|------------|-------------|-------------|
| 3113 | 2988 | 5 | 0 | 0.14381665 | 1.954875    | 47.70532759 |
| 3114 | 2829 | 5 | 0 | 6.97854969 | 1.954875    | 2.2800288   |
| 3115 | 2990 | 5 | 0 | 0.55461359 | 1.954875    | 13.63599724 |
| 3116 | 2916 | 5 | 0 | 8.10418611 | 5.864625    | 55.17242191 |
| 3117 | 2917 | 5 | 0 | 8.51498305 | 5.864625    | 21.10309156 |
| 3118 | 2838 | 5 | 0 | 2.09095263 | 5.864625    | 32.45977251 |
| 3119 | 2839 | 5 | 0 | 5.09761652 | 5.864625    | 43.81574095 |
| 3120 | 2840 | 5 | 0 | 5.50831915 | 5.864625    | 9.74712312  |
| 3121 | 2836 | 5 | 0 | 1.33829645 | 5.864625    | 53.21587219 |
| 3122 | 2837 | 5 | 0 | 1.74899908 | 5.864625    | 19.14654185 |
| 3123 | 2838 | 5 | 0 | 4.75566297 | 5.864625    | 30.5032228  |
| 3124 | 2839 | 5 | 0 | 7.76223255 | 5.864625    | 41.85919124 |
| 3125 | 2840 | 5 | 0 | 8.17302949 | 5.864625    | 7.79057341  |
| 3126 | 2831 | 5 | 0 | 4.46736953 | 5.864625    | 47.50938761 |
| 3127 | 2832 | 5 | 0 | 1.87150257 | 5.864625    | 2.08408882  |
| 3128 | 2833 | 5 | 0 | 4.87807216 | 5.864625    | 13.44005727 |
| 3129 | 2834 | 5 | 0 | 7.88473605 | 5.864625    | 24.79673822 |
| 3130 | 2995 | 5 | 0 | 1.46070563 | 5.864625    | 36.15270666 |
| 3131 | 2831 | 5 | 0 | 1.01030018 | 5.864625    | 47.78441609 |
| 3132 | 2912 | 5 | 0 | 7.84503322 | 5.864625    | 2.3591173   |
| 3133 | 2833 | 5 | 0 | 1.42100281 | 5.864625    | 13.71508574 |
| 3134 | 2834 | 5 | 0 | 4.42766675 | 5.864625    | 25.07176669 |
| 3135 | 2835 | 5 | 0 | 7.43423629 | 5.864625    | 36.42773513 |
| 3136 | 3061 | 5 | 0 | 2.22486715 | 5.864625    | 41.4124481  |
| 3137 | 3062 | 5 | 0 | 5.23153104 | 5.864625    | 52.76841654 |
| 3138 | 3063 | 5 | 0 | 2.63566409 | 5.864625    | 7.34311775  |
| 3139 | 3064 | 5 | 0 | 5.64223367 | 5.864625    | 18.69979871 |
| 3140 | 3065 | 5 | 0 | 8.64889757 | 5.864625    | 30.05576715 |
| 3141 | 2841 | 5 | 0 | 0.19757107 | 11.51476112 | 38.9343418  |
| 3142 | 2842 | 5 | 0 | 3.20423496 | 11.51476112 | 50.29102275 |
| 3143 | 2843 | 5 | 0 | 0.60836801 | 11.51476111 | 4.86572396  |
| 3144 | 2844 | 5 | 0 | 3.61493759 | 11.51476111 | 16.2216924  |
| 3145 | 2845 | 5 | 0 | 6.62160148 | 11.51476111 | 27.57837335 |
| 3146 | 2846 | 5 | 0 | 2.06181208 | 11.46471631 | 27.45368428 |
| 3147 | 2847 | 5 | 0 | 5.06838166 | 11.46471631 | 38.81036523 |
| 3148 | 2848 | 5 | 0 | 8.07504556 | 11.46471631 | 50.16633367 |
| 3149 | 2849 | 5 | 0 | 5.4791786  | 11.46471631 | 4.74103489  |
| 3150 | 2850 | 5 | 0 | 8.48574819 | 11.46471631 | 16.09771584 |
| 3151 | 2856 | 5 | 0 | 1.2354086  | 11.99229798 | 56.25116053 |
| 3152 | 2857 | 5 | 0 | 1.64620554 | 11.99229798 | 22.18183019 |
| 3153 | 2858 | 5 | 0 | 4.65277512 | 11.99229798 | 33.53851114 |
| 3154 | 2859 | 5 | 0 | 7.65943901 | 11.99229798 | 44.89447958 |
| 3155 | 2860 | 5 | 0 | 8.07014164 | 11.99229798 | 10.82586175 |
| 3156 | 2851 | 5 | 0 | 2.51353782 | 15.42568404 | 45.42529879 |
| 3157 | 2932 | 5 | 0 | 9.34827086 | 15.42568404 | 0           |
| 3158 | 2853 | 5 | 0 | 2.92433475 | 15.42568404 | 11.35668095 |
| 3159 | 2854 | 5 | 0 | 5.93090434 | 15.42568404 | 22.71264939 |
| 3160 | 2855 | 5 | 0 | 8.93756823 | 15.42568404 | 34.06933034 |
| 3161 | 2841 | 5 | 0 | 0.19757107 | 8.03398888  | 38.9343418  |
| 3162 | 2842 | 5 | 0 | 3.20423496 | 8.03398889  | 50.29102275 |
| 3163 | 2843 | 5 | 0 | 0.60836801 | 8.03398888  | 4.86572396  |

|      |      |   |   |            |             |             |
|------|------|---|---|------------|-------------|-------------|
| 3164 | 2844 | 5 | 0 | 3.61493759 | 8.03398888  | 16.2216924  |
| 3165 | 2845 | 5 | 0 | 6.62160148 | 8.03398888  | 27.57837335 |
| 3166 | 2846 | 5 | 0 | 2.06181208 | 8.08403369  | 27.45368428 |
| 3167 | 2847 | 5 | 0 | 5.06838166 | 8.08403369  | 38.81036523 |
| 3168 | 2848 | 5 | 0 | 8.07504556 | 8.08403369  | 50.16633367 |
| 3169 | 2849 | 5 | 0 | 5.47917868 | 8.08403368  | 4.74103489  |
| 3170 | 2850 | 5 | 0 | 8.48574819 | 8.08403369  | 16.09771584 |
| 3171 | 2856 | 5 | 0 | 1.23540861 | 15.37595202 | 56.25116053 |
| 3172 | 2857 | 5 | 0 | 1.64620554 | 15.37595202 | 22.18183019 |
| 3173 | 2858 | 5 | 0 | 4.65277512 | 15.37595202 | 33.53851114 |
| 3174 | 2859 | 5 | 0 | 7.65943901 | 15.37595202 | 44.89447958 |
| 3175 | 2860 | 5 | 0 | 8.07014164 | 15.37595202 | 10.82586175 |
| 3176 | 2851 | 5 | 0 | 2.51353782 | 11.94256596 | 45.42529879 |
| 3177 | 2932 | 5 | 0 | 9.34827086 | 11.94256596 | 0           |
| 3178 | 2853 | 5 | 0 | 2.92433475 | 11.94256596 | 11.35668095 |
| 3179 | 2854 | 5 | 0 | 5.93090434 | 11.94256596 | 22.71264939 |
| 3180 | 2855 | 5 | 0 | 8.93756823 | 11.94256596 | 34.06933034 |
| 3181 | 2841 | 5 | 0 | 1.95675519 | 9.774375    | 41.10820675 |
| 3182 | 2842 | 5 | 0 | 4.96341909 | 9.774375    | 52.46488771 |
| 3183 | 2843 | 5 | 0 | 2.36755213 | 9.774375    | 7.03887641  |
| 3184 | 2844 | 5 | 0 | 5.37412172 | 9.774375    | 18.39555736 |
| 3185 | 2845 | 5 | 0 | 8.38078561 | 9.774375    | 29.75223831 |
| 3186 | 2921 | 5 | 0 | 8.07693168 | 9.774375    | 41.3411972  |
| 3187 | 2842 | 5 | 0 | 1.65299557 | 9.774375    | 52.69787815 |
| 3188 | 2923 | 5 | 0 | 8.48772861 | 9.774375    | 7.27257936  |
| 3189 | 2844 | 5 | 0 | 2.06369829 | 9.774375    | 18.6285478  |
| 3190 | 2845 | 5 | 0 | 5.07036209 | 9.774375    | 29.98522876 |
| 3191 | 2846 | 5 | 0 | 3.56118317 | 9.774375    | 24.99267819 |
| 3192 | 2847 | 5 | 0 | 6.56784706 | 9.774375    | 36.34864663 |
| 3193 | 3008 | 5 | 0 | 0.14381665 | 9.774375    | 47.70532759 |
| 3194 | 2849 | 5 | 0 | 6.97854969 | 9.774375    | 2.2800288   |
| 3195 | 3010 | 5 | 0 | 0.55461359 | 9.774375    | 13.63599724 |
| 3196 | 2936 | 5 | 0 | 8.10418611 | 13.684125   | 55.17242191 |
| 3197 | 2937 | 5 | 0 | 8.51498305 | 13.684125   | 21.10309156 |
| 3198 | 2858 | 5 | 0 | 2.09095263 | 13.684125   | 32.45977251 |
| 3199 | 2859 | 5 | 0 | 5.09761652 | 13.684125   | 43.81574095 |
| 3200 | 2860 | 5 | 0 | 5.50831915 | 13.684125   | 9.74712312  |
| 3201 | 2856 | 5 | 0 | 1.33829645 | 13.684125   | 53.21587219 |
| 3202 | 2857 | 5 | 0 | 1.74899908 | 13.684125   | 19.14654185 |
| 3203 | 2858 | 5 | 0 | 4.75566297 | 13.684125   | 30.5032228  |
| 3204 | 2859 | 5 | 0 | 7.76223255 | 13.684125   | 41.85919124 |
| 3205 | 2860 | 5 | 0 | 8.17302949 | 13.684125   | 7.79057341  |
| 3206 | 2851 | 5 | 0 | 4.46736953 | 13.684125   | 47.50938761 |
| 3207 | 2852 | 5 | 0 | 1.87150257 | 13.684125   | 2.08408882  |
| 3208 | 2853 | 5 | 0 | 4.87807216 | 13.684125   | 13.44005727 |
| 3209 | 2854 | 5 | 0 | 7.88473605 | 13.684125   | 24.79673822 |
| 3210 | 3015 | 5 | 0 | 1.46070563 | 13.684125   | 36.15270666 |
| 3211 | 2851 | 5 | 0 | 1.01030018 | 13.684125   | 47.78441609 |
| 3212 | 2932 | 5 | 0 | 7.84503322 | 13.684125   | 2.3591173   |
| 3213 | 2853 | 5 | 0 | 1.42100281 | 13.684125   | 13.71508574 |
| 3214 | 2854 | 5 | 0 | 4.4276667  | 13.684125   | 25.07176669 |



|      |      |   |   |            |                      |             |
|------|------|---|---|------------|----------------------|-------------|
| 3215 | 2855 | 5 | 0 | 7.43423629 | 13.68412536.42773513 |             |
| 3216 | 3066 | 5 | 0 | 2.22486715 | 13.68412541.4124481  |             |
| 3217 | 3067 | 5 | 0 | 5.23153104 | 13.68412552.76841654 |             |
| 3218 | 3068 | 5 | 0 | 2.63566409 | 13.6841257.34311775  |             |
| 3219 | 3069 | 5 | 0 | 5.64223367 | 13.68412518.69979871 |             |
| 3220 | 3070 | 5 | 0 | 8.64889757 | 13.68412530.05576715 |             |
| 3221 | 2861 | 5 | 0 | 0.19757107 | 19.33426112          | 38.9343418  |
| 3222 | 2862 | 5 | 0 | 3.20423496 | 19.33426112          | 50.29102275 |
| 3223 | 2863 | 5 | 0 | 0.60836801 | 19.33426111          | 4.86572396  |
| 3224 | 2864 | 5 | 0 | 3.61493759 | 19.33426111          | 16.2216924  |
| 3225 | 2865 | 5 | 0 | 6.62160148 | 19.33426111          | 27.57837335 |
| 3226 | 2866 | 5 | 0 | 2.06181208 | 19.28421631          | 27.45368428 |
| 3227 | 2867 | 5 | 0 | 5.06838166 | 19.28421631          | 38.81036523 |
| 3228 | 2868 | 5 | 0 | 8.07504556 | 19.28421631          | 50.16633367 |
| 3229 | 2869 | 5 | 0 | 5.4791786  | 19.28421631          | 4.74103489  |
| 3230 | 2870 | 5 | 0 | 8.48574819 | 19.28421631          | 16.09771584 |
| 3231 | 2876 | 5 | 0 | 1.2354086  | 19.81179798          | 56.25116053 |
| 3232 | 2877 | 5 | 0 | 1.64620554 | 19.81179798          | 22.18183019 |
| 3233 | 2878 | 5 | 0 | 4.65277512 | 19.81179798          | 33.53851114 |
| 3234 | 2879 | 5 | 0 | 7.65943901 | 19.81179798          | 44.89447958 |
| 3235 | 2880 | 5 | 0 | 8.07014164 | 19.81179798          | 10.82586175 |
| 3236 | 2871 | 5 | 0 | 2.51353782 | 23.24518404          | 45.42529879 |
| 3237 | 2952 | 5 | 0 | 9.34827086 | 23.24518404          | 0           |
| 3238 | 2873 | 5 | 0 | 2.92433475 | 23.24518404          | 11.35668095 |
| 3239 | 2874 | 5 | 0 | 5.93090434 | 23.24518404          | 22.71264939 |
| 3240 | 2875 | 5 | 0 | 8.93756823 | 23.24518404          | 34.06933034 |
| 3241 | 2861 | 5 | 0 | 0.19757107 | 15.85348888          | 38.9343418  |
| 3242 | 2862 | 5 | 0 | 3.20423496 | 15.85348889          | 50.29102275 |
| 3243 | 2863 | 5 | 0 | 0.60836801 | 15.85348888          | 4.86572396  |
| 3244 | 2864 | 5 | 0 | 3.61493759 | 15.85348888          | 16.2216924  |
| 3245 | 2865 | 5 | 0 | 6.62160148 | 15.85348888          | 27.57837335 |
| 3246 | 2866 | 5 | 0 | 2.06181208 | 15.90353369          | 27.45368428 |
| 3247 | 2867 | 5 | 0 | 5.06838166 | 15.90353369          | 38.81036523 |
| 3248 | 2868 | 5 | 0 | 8.07504556 | 15.90353369          | 50.16633367 |
| 3249 | 2869 | 5 | 0 | 5.4791786  | 15.90353368          | 4.74103489  |
| 3250 | 2870 | 5 | 0 | 8.48574819 | 15.90353369          | 16.09771584 |
| 3251 | 2876 | 5 | 0 | 1.2354086  | 23.19545202          | 56.25116053 |
| 3252 | 2877 | 5 | 0 | 1.64620554 | 23.19545202          | 22.18183019 |
| 3253 | 2878 | 5 | 0 | 4.65277512 | 23.19545202          | 33.53851114 |
| 3254 | 2879 | 5 | 0 | 7.65943901 | 23.19545202          | 44.89447958 |
| 3255 | 2880 | 5 | 0 | 8.07014164 | 23.19545202          | 10.82586175 |
| 3256 | 2871 | 5 | 0 | 2.51353782 | 19.76206596          | 45.42529879 |
| 3257 | 2952 | 5 | 0 | 9.34827086 | 19.76206596          | 0           |
| 3258 | 2873 | 5 | 0 | 2.92433475 | 19.76206596          | 11.35668095 |
| 3259 | 2874 | 5 | 0 | 5.93090434 | 19.76206596          | 22.71264939 |
| 3260 | 2875 | 5 | 0 | 8.93756823 | 19.76206596          | 34.06933034 |
| 3261 | 2861 | 5 | 0 | 1.95675519 | 17.59387541.10820675 |             |
| 3262 | 2862 | 5 | 0 | 4.96341909 | 17.59387552.46488771 |             |
| 3263 | 2863 | 5 | 0 | 2.36755213 | 17.5938757.03887641  |             |
| 3264 | 2864 | 5 | 0 | 5.37412172 | 17.59387518.39555736 |             |
| 3265 | 2865 | 5 | 0 | 8.38078561 | 17.59387529.75223831 |             |

|      |      |   |   |            |             |             |
|------|------|---|---|------------|-------------|-------------|
| 3266 | 2941 | 5 | 0 | 8.07693168 | 17.593875   | 41.3411972  |
| 3267 | 2862 | 5 | 0 | 1.65299557 | 17.593875   | 52.69787815 |
| 3268 | 2943 | 5 | 0 | 8.48772861 | 17.593875   | 7.27257936  |
| 3269 | 2864 | 5 | 0 | 2.0636982  | 17.593875   | 18.6285478  |
| 3270 | 2865 | 5 | 0 | 5.07036209 | 17.593875   | 29.98522876 |
| 3271 | 2866 | 5 | 0 | 3.56118317 | 17.593875   | 24.99267819 |
| 3272 | 2867 | 5 | 0 | 6.56784706 | 17.593875   | 36.34864663 |
| 3273 | 3028 | 5 | 0 | 0.14381665 | 17.593875   | 47.70532759 |
| 3274 | 2869 | 5 | 0 | 6.97854969 | 17.593875   | 2.2800288   |
| 3275 | 3030 | 5 | 0 | 0.55461359 | 17.593875   | 13.63599724 |
| 3276 | 2956 | 5 | 0 | 8.10418611 | 21.503625   | 55.17242191 |
| 3277 | 2957 | 5 | 0 | 8.51498305 | 21.503625   | 21.10309156 |
| 3278 | 2878 | 5 | 0 | 2.09095263 | 21.503625   | 32.45977251 |
| 3279 | 2879 | 5 | 0 | 5.09761652 | 21.503625   | 43.81574095 |
| 3280 | 2880 | 5 | 0 | 5.50831915 | 21.503625   | 9.74712312  |
| 3281 | 2876 | 5 | 0 | 1.33829645 | 21.503625   | 53.21587219 |
| 3282 | 2877 | 5 | 0 | 1.74899908 | 21.503625   | 19.14654185 |
| 3283 | 2878 | 5 | 0 | 4.75566297 | 21.503625   | 30.5032228  |
| 3284 | 2879 | 5 | 0 | 7.76223255 | 21.503625   | 41.85919124 |
| 3285 | 2880 | 5 | 0 | 8.17302949 | 21.503625   | 7.79057341  |
| 3286 | 2871 | 5 | 0 | 4.46736953 | 21.503625   | 47.50938761 |
| 3287 | 2872 | 5 | 0 | 1.87150257 | 21.503625   | 2.08408882  |
| 3288 | 2873 | 5 | 0 | 4.87807216 | 21.503625   | 13.44005727 |
| 3289 | 2874 | 5 | 0 | 7.88473605 | 21.503625   | 24.79673822 |
| 3290 | 3035 | 5 | 0 | 1.46070563 | 21.503625   | 36.15270666 |
| 3291 | 2871 | 5 | 0 | 1.01030018 | 21.503625   | 47.78441609 |
| 3292 | 2952 | 5 | 0 | 7.84503322 | 21.503625   | 2.3591173   |
| 3293 | 2873 | 5 | 0 | 1.42100281 | 21.503625   | 13.71508574 |
| 3294 | 2874 | 5 | 0 | 4.4276667  | 21.503625   | 25.07176669 |
| 3295 | 2875 | 5 | 0 | 7.43423629 | 21.503625   | 36.42773513 |
| 3296 | 3071 | 5 | 0 | 2.22486715 | 21.503625   | 41.4124481  |
| 3297 | 3072 | 5 | 0 | 5.23153104 | 21.503625   | 52.76841654 |
| 3298 | 3073 | 5 | 0 | 2.63566409 | 21.503625   | 7.34311775  |
| 3299 | 3074 | 5 | 0 | 5.64223367 | 21.503625   | 18.69979871 |
| 3300 | 3075 | 5 | 0 | 8.64889757 | 21.503625   | 30.05576715 |
| 3301 | 2881 | 5 | 0 | 0.19757107 | 27.15376112 | 38.9343418  |
| 3302 | 2882 | 5 | 0 | 3.20423496 | 27.15376112 | 50.29102275 |
| 3303 | 2883 | 5 | 0 | 0.60836801 | 27.15376111 | 4.86572396  |
| 3304 | 2884 | 5 | 0 | 3.61493759 | 27.15376111 | 16.2216924  |
| 3305 | 2885 | 5 | 0 | 6.62160148 | 27.15376111 | 27.57837335 |
| 3306 | 2886 | 5 | 0 | 2.06181208 | 27.10371631 | 27.45368428 |
| 3307 | 2887 | 5 | 0 | 5.06838166 | 27.10371631 | 38.81036523 |
| 3308 | 2888 | 5 | 0 | 8.07504556 | 27.10371631 | 50.16633367 |
| 3309 | 2889 | 5 | 0 | 5.4791786  | 27.10371631 | 4.74103489  |
| 3310 | 2890 | 5 | 0 | 8.48574819 | 27.10371631 | 16.09771584 |
| 3311 | 2896 | 5 | 0 | 1.2354086  | 27.63129798 | 56.25116053 |
| 3312 | 2897 | 5 | 0 | 1.64620554 | 27.63129798 | 22.18183019 |
| 3313 | 2898 | 5 | 0 | 4.65277512 | 27.63129798 | 33.53851114 |
| 3314 | 2899 | 5 | 0 | 7.65943901 | 27.63129798 | 44.89447958 |
| 3315 | 2900 | 5 | 0 | 8.07014164 | 27.63129798 | 10.82586175 |
| 3316 | 2891 | 5 | 0 | 2.51353782 | 31.06468404 | 45.42529879 |

|      |      |   |   |                      |                      |             |
|------|------|---|---|----------------------|----------------------|-------------|
| 3317 | 2972 | 5 | 0 | 9.34827086           | 31.06468404          | 0           |
| 3318 | 2893 | 5 | 0 | 2.92433475           | 31.06468404          | 11.35668095 |
| 3319 | 2894 | 5 | 0 | 5.93090434           | 31.06468404          | 22.71264939 |
| 3320 | 2895 | 5 | 0 | 8.93756823           | 31.06468404          | 34.06933034 |
| 3321 | 2881 | 5 | 0 | 0.19757107           | 23.67298888          | 38.9343418  |
| 3322 | 2882 | 5 | 0 | 3.20423496           | 23.67298889          | 50.29102275 |
| 3323 | 2883 | 5 | 0 | 0.60836801           | 23.67298888          | 4.86572396  |
| 3324 | 2884 | 5 | 0 | 3.61493759           | 23.67298888          | 16.2216924  |
| 3325 | 2885 | 5 | 0 | 6.62160148           | 23.67298888          | 27.57837335 |
| 3326 | 2886 | 5 | 0 | 2.06181208           | 23.72303369          | 27.45368428 |
| 3327 | 2887 | 5 | 0 | 5.06838166           | 23.72303369          | 38.81036523 |
| 3328 | 2888 | 5 | 0 | 8.07504556           | 23.72303369          | 50.16633367 |
| 3329 | 2889 | 5 | 0 | 5.479178623.72303368 | 4.74103489           |             |
| 3330 | 2890 | 5 | 0 | 8.48574819           | 23.72303369          | 16.09771584 |
| 3331 | 2896 | 5 | 0 | 1.235408631.01495202 | 56.25116053          |             |
| 3332 | 2897 | 5 | 0 | 1.64620554           | 31.01495202          | 22.18183019 |
| 3333 | 2898 | 5 | 0 | 4.65277512           | 31.01495202          | 33.53851114 |
| 3334 | 2899 | 5 | 0 | 7.65943901           | 31.01495202          | 44.89447958 |
| 3335 | 2900 | 5 | 0 | 8.07014164           | 31.01495202          | 10.82586175 |
| 3336 | 2891 | 5 | 0 | 2.51353782           | 27.58156596          | 45.42529879 |
| 3337 | 2972 | 5 | 0 | 9.34827086           | 27.58156596          | 0           |
| 3338 | 2893 | 5 | 0 | 2.92433475           | 27.58156596          | 11.35668095 |
| 3339 | 2894 | 5 | 0 | 5.93090434           | 27.58156596          | 22.71264939 |
| 3340 | 2895 | 5 | 0 | 8.93756823           | 27.58156596          | 34.06933034 |
| 3341 | 2881 | 5 | 0 | 1.95675519           | 25.41337541.10820675 |             |
| 3342 | 2882 | 5 | 0 | 4.96341909           | 25.41337552.46488771 |             |
| 3343 | 2883 | 5 | 0 | 2.36755213           | 25.4133757.03887641  |             |
| 3344 | 2884 | 5 | 0 | 5.37412172           | 25.41337518.39555736 |             |
| 3345 | 2885 | 5 | 0 | 8.38078561           | 25.41337529.75223831 |             |
| 3346 | 2961 | 5 | 0 | 8.07693168           | 25.41337541.3411972  |             |
| 3347 | 2882 | 5 | 0 | 1.65299557           | 25.41337552.69787815 |             |
| 3348 | 2963 | 5 | 0 | 8.48772861           | 25.4133757.27257936  |             |
| 3349 | 2884 | 5 | 0 | 2.063698225.413375   | 18.6285478           |             |
| 3350 | 2885 | 5 | 0 | 5.07036209           | 25.41337529.98522876 |             |
| 3351 | 2886 | 5 | 0 | 3.56118317           | 25.41337524.99267819 |             |
| 3352 | 2887 | 5 | 0 | 6.56784706           | 25.41337536.34864663 |             |
| 3353 | 3048 | 5 | 0 | 0.14381665           | 25.41337547.70532759 |             |
| 3354 | 2889 | 5 | 0 | 6.97854969           | 25.4133752.2800288   |             |
| 3355 | 3050 | 5 | 0 | 0.55461359           | 25.41337513.63599724 |             |
| 3356 | 2976 | 5 | 0 | 8.10418611           | 29.32312555.17242191 |             |
| 3357 | 2977 | 5 | 0 | 8.51498305           | 29.32312521.10309156 |             |
| 3358 | 2898 | 5 | 0 | 2.09095263           | 29.32312532.45977251 |             |
| 3359 | 2899 | 5 | 0 | 5.09761652           | 29.32312543.81574095 |             |
| 3360 | 2900 | 5 | 0 | 5.50831915           | 29.3231259.74712312  |             |
| 3361 | 2896 | 5 | 0 | 1.33829645           | 29.32312553.21587219 |             |
| 3362 | 2897 | 5 | 0 | 1.74899908           | 29.32312519.14654185 |             |
| 3363 | 2898 | 5 | 0 | 4.75566297           | 29.32312530.5032228  |             |
| 3364 | 2899 | 5 | 0 | 7.76223255           | 29.32312541.85919124 |             |
| 3365 | 2900 | 5 | 0 | 8.17302949           | 29.3231257.79057341  |             |
| 3366 | 2891 | 5 | 0 | 4.46736953           | 29.32312547.50938761 |             |
| 3367 | 2892 | 5 | 0 | 1.87150257           | 29.3231252.08408882  |             |

|      |      |   |   |             |            |             |
|------|------|---|---|-------------|------------|-------------|
| 3368 | 2893 | 5 | 0 | 4.87807216  | 29.323125  | 13.44005727 |
| 3369 | 2894 | 5 | 0 | 7.88473605  | 29.323125  | 24.79673822 |
| 3370 | 3055 | 5 | 0 | 1.46070563  | 29.323125  | 36.15270666 |
| 3371 | 2891 | 5 | 0 | 1.01030018  | 29.323125  | 47.78441609 |
| 3372 | 2972 | 5 | 0 | 7.84503322  | 29.323125  | 2.3591173   |
| 3373 | 2893 | 5 | 0 | 1.42100281  | 29.323125  | 13.71508574 |
| 3374 | 2894 | 5 | 0 | 4.4276667   | 29.323125  | 25.07176669 |
| 3375 | 2895 | 5 | 0 | 7.43423629  | 29.323125  | 36.42773513 |
| 3376 | 3076 | 5 | 0 | 2.22486715  | 29.323125  | 41.4124481  |
| 3377 | 3077 | 5 | 0 | 5.23153104  | 29.323125  | 52.76841654 |
| 3378 | 3078 | 5 | 0 | 2.63566409  | 29.323125  | 7.34311775  |
| 3379 | 3079 | 5 | 0 | 5.64223367  | 29.323125  | 18.69979871 |
| 3380 | 3080 | 5 | 0 | 8.64889757  | 29.323125  | 30.05576715 |
| 3381 | 2901 | 5 | 0 | 9.62817107  | 3.69526112 | 38.9343418  |
| 3382 | 2902 | 5 | 0 | 12.63483496 | 3.69526112 | 50.29102275 |
| 3383 | 2903 | 5 | 0 | 10.03896801 | 3.69526111 | 4.86572396  |
| 3384 | 2904 | 5 | 0 | 13.04553759 | 3.69526111 | 16.2216924  |
| 3385 | 2905 | 5 | 0 | 16.05220148 | 3.69526111 | 27.57837335 |
| 3386 | 2906 | 5 | 0 | 11.49241208 | 3.64521631 | 27.45368428 |
| 3387 | 2907 | 5 | 0 | 14.49898166 | 3.64521631 | 38.81036523 |
| 3388 | 2908 | 5 | 0 | 17.50564556 | 3.64521631 | 50.16633367 |
| 3389 | 2909 | 5 | 0 | 14.9097786  | 3.64521631 | 4.74103489  |
| 3390 | 2910 | 5 | 0 | 17.91634819 | 3.64521631 | 16.09771584 |
| 3391 | 2916 | 5 | 0 | 10.6660086  | 4.17279798 | 56.25116053 |
| 3392 | 2917 | 5 | 0 | 11.07680554 | 4.17279798 | 22.18183019 |
| 3393 | 2918 | 5 | 0 | 14.08337512 | 4.17279798 | 33.53851114 |
| 3394 | 2919 | 5 | 0 | 17.09003901 | 4.17279798 | 44.89447958 |
| 3395 | 2920 | 5 | 0 | 17.50074164 | 4.17279798 | 10.82586175 |
| 3396 | 2911 | 5 | 0 | 11.94413782 | 7.60618404 | 45.42529879 |
| 3397 | 2992 | 5 | 0 | 18.77887086 | 7.60618404 | 0           |
| 3398 | 2913 | 5 | 0 | 12.35493475 | 7.60618404 | 11.35668095 |
| 3399 | 2914 | 5 | 0 | 15.36150434 | 7.60618404 | 22.71264939 |
| 3400 | 2915 | 5 | 0 | 18.36816823 | 7.60618404 | 34.06933034 |
| 3401 | 2901 | 5 | 0 | 9.62817107  | 0.21448888 | 38.9343418  |
| 3402 | 2902 | 5 | 0 | 12.63483496 | 0.21448889 | 50.29102275 |
| 3403 | 2903 | 5 | 0 | 10.03896801 | 0.21448888 | 4.86572396  |
| 3404 | 2904 | 5 | 0 | 13.04553759 | 0.21448888 | 16.2216924  |
| 3405 | 2905 | 5 | 0 | 16.05220148 | 0.21448888 | 27.57837335 |
| 3406 | 2906 | 5 | 0 | 11.49241208 | 0.26453369 | 27.45368428 |
| 3407 | 2907 | 5 | 0 | 14.49898166 | 0.26453369 | 38.81036523 |
| 3408 | 2908 | 5 | 0 | 17.50564556 | 0.26453369 | 50.16633367 |
| 3409 | 2909 | 5 | 0 | 14.9097786  | 0.26453368 | 4.74103489  |
| 3410 | 2910 | 5 | 0 | 17.91634819 | 0.26453369 | 16.09771584 |
| 3411 | 2916 | 5 | 0 | 10.6660086  | 7.55645202 | 56.25116053 |
| 3412 | 2917 | 5 | 0 | 11.07680554 | 7.55645202 | 22.18183019 |
| 3413 | 2918 | 5 | 0 | 14.08337512 | 7.55645202 | 33.53851114 |
| 3414 | 2919 | 5 | 0 | 17.09003901 | 7.55645202 | 44.89447958 |
| 3415 | 2920 | 5 | 0 | 17.50074164 | 7.55645202 | 10.82586175 |
| 3416 | 2911 | 5 | 0 | 11.94413782 | 4.12306596 | 45.42529879 |
| 3417 | 2992 | 5 | 0 | 18.77887086 | 4.12306596 | 0           |
| 3418 | 2913 | 5 | 0 | 12.35493475 | 4.12306596 | 11.35668095 |

|      |      |   |   |             |             |             |
|------|------|---|---|-------------|-------------|-------------|
| 3419 | 2914 | 5 | 0 | 15.36150434 | 4.12306596  | 22.71264939 |
| 3420 | 2915 | 5 | 0 | 18.36816823 | 4.12306596  | 34.06933034 |
| 3421 | 2901 | 5 | 0 | 11.38735519 | 1.954875    | 41.10820675 |
| 3422 | 2902 | 5 | 0 | 14.39401909 | 1.954875    | 52.46488771 |
| 3423 | 2903 | 5 | 0 | 11.79815213 | 1.954875    | 7.03887641  |
| 3424 | 2904 | 5 | 0 | 14.80472172 | 1.954875    | 18.39555736 |
| 3425 | 2905 | 5 | 0 | 17.81138561 | 1.954875    | 29.75223831 |
| 3426 | 2981 | 5 | 0 | 17.50753168 | 1.954875    | 41.3411972  |
| 3427 | 2902 | 5 | 0 | 11.08359557 | 1.954875    | 52.69787815 |
| 3428 | 2983 | 5 | 0 | 17.91832861 | 1.954875    | 7.27257936  |
| 3429 | 2904 | 5 | 0 | 11.4942982  | 1.954875    | 18.6285478  |
| 3430 | 2905 | 5 | 0 | 14.50096209 | 1.954875    | 29.98522876 |
| 3431 | 2906 | 5 | 0 | 12.99178317 | 1.954875    | 24.99267819 |
| 3432 | 2907 | 5 | 0 | 15.99844706 | 1.954875    | 36.34864663 |
| 3433 | 2828 | 5 | 0 | 9.57441665  | 1.954875    | 47.70532759 |
| 3434 | 2909 | 5 | 0 | 16.40914969 | 1.954875    | 2.2800288   |
| 3435 | 2830 | 5 | 0 | 9.98521359  | 1.954875    | 13.63599724 |
| 3436 | 2996 | 5 | 0 | 17.53478611 | 5.864625    | 55.17242191 |
| 3437 | 2997 | 5 | 0 | 17.94558305 | 5.864625    | 21.10309156 |
| 3438 | 2918 | 5 | 0 | 11.52155263 | 5.864625    | 32.45977251 |
| 3439 | 2919 | 5 | 0 | 14.52821652 | 5.864625    | 43.81574095 |
| 3440 | 2920 | 5 | 0 | 14.93891915 | 5.864625    | 9.74712312  |
| 3441 | 2916 | 5 | 0 | 10.76889645 | 5.864625    | 53.21587219 |
| 3442 | 2917 | 5 | 0 | 11.17959908 | 5.864625    | 19.14654185 |
| 3443 | 2918 | 5 | 0 | 14.18626297 | 5.864625    | 30.5032228  |
| 3444 | 2919 | 5 | 0 | 17.19283255 | 5.864625    | 41.85919124 |
| 3445 | 2920 | 5 | 0 | 17.60362949 | 5.864625    | 7.79057341  |
| 3446 | 2911 | 5 | 0 | 13.89796953 | 5.864625    | 47.50938761 |
| 3447 | 2912 | 5 | 0 | 11.30210257 | 5.864625    | 2.08408882  |
| 3448 | 2913 | 5 | 0 | 14.30867216 | 5.864625    | 13.44005727 |
| 3449 | 2914 | 5 | 0 | 17.31533605 | 5.864625    | 24.79673822 |
| 3450 | 2835 | 5 | 0 | 10.89130563 | 5.864625    | 36.15270666 |
| 3451 | 2911 | 5 | 0 | 10.44090018 | 5.864625    | 47.78441609 |
| 3452 | 2992 | 5 | 0 | 17.27563322 | 5.864625    | 2.3591173   |
| 3453 | 2913 | 5 | 0 | 10.85160281 | 5.864625    | 13.71508574 |
| 3454 | 2914 | 5 | 0 | 13.8582667  | 5.864625    | 25.07176669 |
| 3455 | 2915 | 5 | 0 | 16.86483629 | 5.864625    | 36.42773513 |
| 3456 | 3081 | 5 | 0 | 11.65546715 | 5.864625    | 41.4124481  |
| 3457 | 3082 | 5 | 0 | 14.66213104 | 5.864625    | 52.76841654 |
| 3458 | 3083 | 5 | 0 | 12.06626409 | 5.864625    | 7.34311775  |
| 3459 | 3084 | 5 | 0 | 15.07283367 | 5.864625    | 18.69979871 |
| 3460 | 3085 | 5 | 0 | 18.07949757 | 5.864625    | 30.05576715 |
| 3461 | 2921 | 5 | 0 | 9.62817107  | 11.51476112 | 38.9343418  |
| 3462 | 2922 | 5 | 0 | 12.63483496 | 11.51476112 | 50.29102275 |
| 3463 | 2923 | 5 | 0 | 10.03896801 | 11.51476111 | 4.86572396  |
| 3464 | 2924 | 5 | 0 | 13.04553759 | 11.51476111 | 16.2216924  |
| 3465 | 2925 | 5 | 0 | 16.05220148 | 11.51476111 | 27.57837335 |
| 3466 | 2926 | 5 | 0 | 11.49241208 | 11.46471631 | 27.45368428 |
| 3467 | 2927 | 5 | 0 | 14.49898166 | 11.46471631 | 38.81036523 |
| 3468 | 2928 | 5 | 0 | 17.50564556 | 11.46471631 | 50.16633367 |
| 3469 | 2929 | 5 | 0 | 14.9097786  | 11.46471631 | 4.74103489  |

|      |      |   |   |             |             |             |
|------|------|---|---|-------------|-------------|-------------|
| 3470 | 2930 | 5 | 0 | 17.91634819 | 11.46471631 | 16.09771584 |
| 3471 | 2936 | 5 | 0 | 10.6660086  | 11.99229798 | 56.25116053 |
| 3472 | 2937 | 5 | 0 | 11.07680554 | 11.99229798 | 22.18183019 |
| 3473 | 2938 | 5 | 0 | 14.08337512 | 11.99229798 | 33.53851114 |
| 3474 | 2939 | 5 | 0 | 17.09003901 | 11.99229798 | 44.89447958 |
| 3475 | 2940 | 5 | 0 | 17.50074164 | 11.99229798 | 10.82586175 |
| 3476 | 2931 | 5 | 0 | 11.94413782 | 15.42568404 | 45.42529879 |
| 3477 | 3012 | 5 | 0 | 18.77887086 | 15.42568404 | 0           |
| 3478 | 2933 | 5 | 0 | 12.35493475 | 15.42568404 | 11.35668095 |
| 3479 | 2934 | 5 | 0 | 15.36150434 | 15.42568404 | 22.71264939 |
| 3480 | 2935 | 5 | 0 | 18.36816823 | 15.42568404 | 34.06933034 |
| 3481 | 2921 | 5 | 0 | 9.62817107  | 8.03398888  | 38.9343418  |
| 3482 | 2922 | 5 | 0 | 12.63483496 | 8.03398889  | 50.29102275 |
| 3483 | 2923 | 5 | 0 | 10.03896801 | 8.03398888  | 4.86572396  |
| 3484 | 2924 | 5 | 0 | 13.04553759 | 8.03398888  | 16.2216924  |
| 3485 | 2925 | 5 | 0 | 16.05220148 | 8.03398888  | 27.57837335 |
| 3486 | 2926 | 5 | 0 | 11.49241208 | 8.08403369  | 27.45368428 |
| 3487 | 2927 | 5 | 0 | 14.49898166 | 8.08403369  | 38.81036523 |
| 3488 | 2928 | 5 | 0 | 17.50564556 | 8.08403369  | 50.16633367 |
| 3489 | 2929 | 5 | 0 | 14.9097786  | 8.08403368  | 4.74103489  |
| 3490 | 2930 | 5 | 0 | 17.91634819 | 8.08403369  | 16.09771584 |
| 3491 | 2936 | 5 | 0 | 10.6660086  | 15.37595202 | 56.25116053 |
| 3492 | 2937 | 5 | 0 | 11.07680554 | 15.37595202 | 22.18183019 |
| 3493 | 2938 | 5 | 0 | 14.08337512 | 15.37595202 | 33.53851114 |
| 3494 | 2939 | 5 | 0 | 17.09003901 | 15.37595202 | 44.89447958 |
| 3495 | 2940 | 5 | 0 | 17.50074164 | 15.37595202 | 10.82586175 |
| 3496 | 2931 | 5 | 0 | 11.94413782 | 11.94256596 | 45.42529879 |
| 3497 | 3012 | 5 | 0 | 18.77887086 | 11.94256596 | 0           |
| 3498 | 2933 | 5 | 0 | 12.35493475 | 11.94256596 | 11.35668095 |
| 3499 | 2934 | 5 | 0 | 15.36150434 | 11.94256596 | 22.71264939 |
| 3500 | 2935 | 5 | 0 | 18.36816823 | 11.94256596 | 34.06933034 |
| 3501 | 2921 | 5 | 0 | 11.38735519 | 9.774375    | 41.10820675 |
| 3502 | 2922 | 5 | 0 | 14.39401909 | 9.774375    | 52.46488771 |
| 3503 | 2923 | 5 | 0 | 11.79815213 | 9.774375    | 7.03887641  |
| 3504 | 2924 | 5 | 0 | 14.80472172 | 9.774375    | 18.39555736 |
| 3505 | 2925 | 5 | 0 | 17.81138561 | 9.774375    | 29.75223831 |
| 3506 | 3001 | 5 | 0 | 17.50753168 | 9.774375    | 41.3411972  |
| 3507 | 2922 | 5 | 0 | 11.08359557 | 9.774375    | 52.69787815 |
| 3508 | 3003 | 5 | 0 | 17.91832861 | 9.774375    | 7.27257936  |
| 3509 | 2924 | 5 | 0 | 11.4942982  | 9.774375    | 18.6285478  |
| 3510 | 2925 | 5 | 0 | 14.50096209 | 9.774375    | 29.98522876 |
| 3511 | 2926 | 5 | 0 | 12.99178317 | 9.774375    | 24.99267819 |
| 3512 | 2927 | 5 | 0 | 15.99844706 | 9.774375    | 36.34864663 |
| 3513 | 2848 | 5 | 0 | 9.57441665  | 9.774375    | 47.70532759 |
| 3514 | 2929 | 5 | 0 | 16.40914969 | 9.774375    | 2.2800288   |
| 3515 | 2850 | 5 | 0 | 9.98521359  | 9.774375    | 13.63599724 |
| 3516 | 3016 | 5 | 0 | 17.53478611 | 13.684125   | 55.17242191 |
| 3517 | 3017 | 5 | 0 | 17.94558305 | 13.684125   | 21.10309156 |
| 3518 | 2938 | 5 | 0 | 11.52155263 | 13.684125   | 32.45977251 |
| 3519 | 2939 | 5 | 0 | 14.52821652 | 13.684125   | 43.81574095 |
| 3520 | 2940 | 5 | 0 | 14.93891915 | 13.684125   | 9.74712312  |

|      |      |   |   |             |                      |             |
|------|------|---|---|-------------|----------------------|-------------|
| 3521 | 2936 | 5 | 0 | 10.76889645 | 13.68412553.21587219 |             |
| 3522 | 2937 | 5 | 0 | 11.17959908 | 13.68412519.14654185 |             |
| 3523 | 2938 | 5 | 0 | 14.18626297 | 13.68412530.5032228  |             |
| 3524 | 2939 | 5 | 0 | 17.19283255 | 13.68412541.85919124 |             |
| 3525 | 2940 | 5 | 0 | 17.60362949 | 13.6841257.79057341  |             |
| 3526 | 2931 | 5 | 0 | 13.89796953 | 13.68412547.50938761 |             |
| 3527 | 2932 | 5 | 0 | 11.30210257 | 13.6841252.08408882  |             |
| 3528 | 2933 | 5 | 0 | 14.30867216 | 13.68412513.44005727 |             |
| 3529 | 2934 | 5 | 0 | 17.31533605 | 13.68412524.79673822 |             |
| 3530 | 2855 | 5 | 0 | 10.89130563 | 13.68412536.15270666 |             |
| 3531 | 2931 | 5 | 0 | 10.44090018 | 13.68412547.78441609 |             |
| 3532 | 3012 | 5 | 0 | 17.27563322 | 13.6841252.3591173   |             |
| 3533 | 2933 | 5 | 0 | 10.85160281 | 13.68412513.71508574 |             |
| 3534 | 2934 | 5 | 0 | 13.8582667  | 13.68412525.07176669 |             |
| 3535 | 2935 | 5 | 0 | 16.86483629 | 13.68412536.42773513 |             |
| 3536 | 3086 | 5 | 0 | 11.65546715 | 13.68412541.4124481  |             |
| 3537 | 3087 | 5 | 0 | 14.66213104 | 13.68412552.76841654 |             |
| 3538 | 3088 | 5 | 0 | 12.06626409 | 13.6841257.34311775  |             |
| 3539 | 3089 | 5 | 0 | 15.07283367 | 13.68412518.69979871 |             |
| 3540 | 3090 | 5 | 0 | 18.07949757 | 13.68412530.05576715 |             |
| 3541 | 2941 | 5 | 0 | 9.62817107  | 19.33426112          | 38.9343418  |
| 3542 | 2942 | 5 | 0 | 12.63483496 | 19.33426112          | 50.29102275 |
| 3543 | 2943 | 5 | 0 | 10.03896801 | 19.33426111          | 4.86572396  |
| 3544 | 2944 | 5 | 0 | 13.04553759 | 19.33426111          | 16.2216924  |
| 3545 | 2945 | 5 | 0 | 16.05220148 | 19.33426111          | 27.57837335 |
| 3546 | 2946 | 5 | 0 | 11.49241208 | 19.28421631          | 27.45368428 |
| 3547 | 2947 | 5 | 0 | 14.49898166 | 19.28421631          | 38.81036523 |
| 3548 | 2948 | 5 | 0 | 17.50564556 | 19.28421631          | 50.16633367 |
| 3549 | 2949 | 5 | 0 | 14.9097786  | 19.28421631          | 4.74103489  |
| 3550 | 2950 | 5 | 0 | 17.91634819 | 19.28421631          | 16.09771584 |
| 3551 | 2956 | 5 | 0 | 10.6660086  | 19.81179798          | 56.25116053 |
| 3552 | 2957 | 5 | 0 | 11.07680554 | 19.81179798          | 22.18183019 |
| 3553 | 2958 | 5 | 0 | 14.08337512 | 19.81179798          | 33.53851114 |
| 3554 | 2959 | 5 | 0 | 17.09003901 | 19.81179798          | 44.89447958 |
| 3555 | 2960 | 5 | 0 | 17.50074164 | 19.81179798          | 10.82586175 |
| 3556 | 2951 | 5 | 0 | 11.94413782 | 23.24518404          | 45.42529879 |
| 3557 | 3032 | 5 | 0 | 18.77887086 | 23.24518404          | 0           |
| 3558 | 2953 | 5 | 0 | 12.35493475 | 23.24518404          | 11.35668095 |
| 3559 | 2954 | 5 | 0 | 15.36150434 | 23.24518404          | 22.71264939 |
| 3560 | 2955 | 5 | 0 | 18.36816823 | 23.24518404          | 34.06933034 |
| 3561 | 2941 | 5 | 0 | 9.62817107  | 15.85348888          | 38.9343418  |
| 3562 | 2942 | 5 | 0 | 12.63483496 | 15.85348889          | 50.29102275 |
| 3563 | 2943 | 5 | 0 | 10.03896801 | 15.85348888          | 4.86572396  |
| 3564 | 2944 | 5 | 0 | 13.04553759 | 15.85348888          | 16.2216924  |
| 3565 | 2945 | 5 | 0 | 16.05220148 | 15.85348888          | 27.57837335 |
| 3566 | 2946 | 5 | 0 | 11.49241208 | 15.90353369          | 27.45368428 |
| 3567 | 2947 | 5 | 0 | 14.49898166 | 15.90353369          | 38.81036523 |
| 3568 | 2948 | 5 | 0 | 17.50564556 | 15.90353369          | 50.16633367 |
| 3569 | 2949 | 5 | 0 | 14.9097786  | 15.90353368          | 4.74103489  |
| 3570 | 2950 | 5 | 0 | 17.91634819 | 15.90353369          | 16.09771584 |
| 3571 | 2956 | 5 | 0 | 10.6660086  | 23.19545202          | 56.25116053 |

|      |      |   |   |             |                      |             |
|------|------|---|---|-------------|----------------------|-------------|
| 3572 | 2957 | 5 | 0 | 11.07680554 | 23.19545202          | 22.18183019 |
| 3573 | 2958 | 5 | 0 | 14.08337512 | 23.19545202          | 33.53851114 |
| 3574 | 2959 | 5 | 0 | 17.09003901 | 23.19545202          | 44.89447958 |
| 3575 | 2960 | 5 | 0 | 17.50074164 | 23.19545202          | 10.82586175 |
| 3576 | 2951 | 5 | 0 | 11.94413782 | 19.76206596          | 45.42529879 |
| 3577 | 3032 | 5 | 0 | 18.77887086 | 19.76206596          | 0           |
| 3578 | 2953 | 5 | 0 | 12.35493475 | 19.76206596          | 11.35668095 |
| 3579 | 2954 | 5 | 0 | 15.36150434 | 19.76206596          | 22.71264939 |
| 3580 | 2955 | 5 | 0 | 18.36816823 | 19.76206596          | 34.06933034 |
| 3581 | 2941 | 5 | 0 | 11.38735519 | 17.59387541.10820675 |             |
| 3582 | 2942 | 5 | 0 | 14.39401909 | 17.59387552.46488771 |             |
| 3583 | 2943 | 5 | 0 | 11.79815213 | 17.5938757.03887641  |             |
| 3584 | 2944 | 5 | 0 | 14.80472172 | 17.59387518.39555736 |             |
| 3585 | 2945 | 5 | 0 | 17.81138561 | 17.59387529.75223831 |             |
| 3586 | 3021 | 5 | 0 | 17.50753168 | 17.59387541.3411972  |             |
| 3587 | 2942 | 5 | 0 | 11.08359557 | 17.59387552.69787815 |             |
| 3588 | 3023 | 5 | 0 | 17.91832861 | 17.5938757.27257936  |             |
| 3589 | 2944 | 5 | 0 | 11.4942982  | 17.59387518.6285478  |             |
| 3590 | 2945 | 5 | 0 | 14.50096209 | 17.59387529.98522876 |             |
| 3591 | 2946 | 5 | 0 | 12.99178317 | 17.59387524.99267819 |             |
| 3592 | 2947 | 5 | 0 | 15.99844706 | 17.59387536.34864663 |             |
| 3593 | 2868 | 5 | 0 | 9.57441665  | 17.59387547.70532759 |             |
| 3594 | 2949 | 5 | 0 | 16.40914969 | 17.5938752.2800288   |             |
| 3595 | 2870 | 5 | 0 | 9.98521359  | 17.59387513.63599724 |             |
| 3596 | 3036 | 5 | 0 | 17.53478611 | 21.50362555.17242191 |             |
| 3597 | 3037 | 5 | 0 | 17.94558305 | 21.50362521.10309156 |             |
| 3598 | 2958 | 5 | 0 | 11.52155263 | 21.50362532.45977251 |             |
| 3599 | 2959 | 5 | 0 | 14.52821652 | 21.50362543.81574095 |             |
| 3600 | 2960 | 5 | 0 | 14.93891915 | 21.5036259.74712312  |             |
| 3601 | 2956 | 5 | 0 | 10.76889645 | 21.50362553.21587219 |             |
| 3602 | 2957 | 5 | 0 | 11.17959908 | 21.50362519.14654185 |             |
| 3603 | 2958 | 5 | 0 | 14.18626297 | 21.50362530.5032228  |             |
| 3604 | 2959 | 5 | 0 | 17.19283255 | 21.50362541.85919124 |             |
| 3605 | 2960 | 5 | 0 | 17.60362949 | 21.5036257.79057341  |             |
| 3606 | 2951 | 5 | 0 | 13.89796953 | 21.50362547.50938761 |             |
| 3607 | 2952 | 5 | 0 | 11.30210257 | 21.5036252.08408882  |             |
| 3608 | 2953 | 5 | 0 | 14.30867216 | 21.50362513.44005727 |             |
| 3609 | 2954 | 5 | 0 | 17.31533605 | 21.50362524.79673822 |             |
| 3610 | 2875 | 5 | 0 | 10.89130563 | 21.50362536.15270666 |             |
| 3611 | 2951 | 5 | 0 | 10.44090018 | 21.50362547.78441609 |             |
| 3612 | 3032 | 5 | 0 | 17.27563322 | 21.5036252.3591173   |             |
| 3613 | 2953 | 5 | 0 | 10.85160281 | 21.50362513.71508574 |             |
| 3614 | 2954 | 5 | 0 | 13.8582667  | 21.50362525.07176669 |             |
| 3615 | 2955 | 5 | 0 | 16.86483629 | 21.50362536.42773513 |             |
| 3616 | 3091 | 5 | 0 | 11.65546715 | 21.50362541.4124481  |             |
| 3617 | 3092 | 5 | 0 | 14.66213104 | 21.50362552.76841654 |             |
| 3618 | 3093 | 5 | 0 | 12.06626409 | 21.5036257.34311775  |             |
| 3619 | 3094 | 5 | 0 | 15.07283367 | 21.50362518.69979871 |             |
| 3620 | 3095 | 5 | 0 | 18.07949757 | 21.50362530.05576715 |             |
| 3621 | 2961 | 5 | 0 | 9.62817107  | 27.15376112          | 38.9343418  |
| 3622 | 2962 | 5 | 0 | 12.63483496 | 27.15376112          | 50.29102275 |



|      |      |   |   |             |                      |             |
|------|------|---|---|-------------|----------------------|-------------|
| 3623 | 2963 | 5 | 0 | 10.03896801 | 27.15376111          | 4.86572396  |
| 3624 | 2964 | 5 | 0 | 13.04553759 | 27.15376111          | 16.2216924  |
| 3625 | 2965 | 5 | 0 | 16.05220148 | 27.15376111          | 27.57837335 |
| 3626 | 2966 | 5 | 0 | 11.49241208 | 27.10371631          | 27.45368428 |
| 3627 | 2967 | 5 | 0 | 14.49898166 | 27.10371631          | 38.81036523 |
| 3628 | 2968 | 5 | 0 | 17.50564556 | 27.10371631          | 50.16633367 |
| 3629 | 2969 | 5 | 0 | 14.9097786  | 27.10371631          | 4.74103489  |
| 3630 | 2970 | 5 | 0 | 17.91634819 | 27.10371631          | 16.09771584 |
| 3631 | 2976 | 5 | 0 | 10.6660086  | 27.63129798          | 56.25116053 |
| 3632 | 2977 | 5 | 0 | 11.07680554 | 27.63129798          | 22.18183019 |
| 3633 | 2978 | 5 | 0 | 14.08337512 | 27.63129798          | 33.53851114 |
| 3634 | 2979 | 5 | 0 | 17.09003901 | 27.63129798          | 44.89447958 |
| 3635 | 2980 | 5 | 0 | 17.50074164 | 27.63129798          | 10.82586175 |
| 3636 | 2971 | 5 | 0 | 11.94413782 | 31.06468404          | 45.42529879 |
| 3637 | 3052 | 5 | 0 | 18.77887086 | 31.06468404          | 0           |
| 3638 | 2973 | 5 | 0 | 12.35493475 | 31.06468404          | 11.35668095 |
| 3639 | 2974 | 5 | 0 | 15.36150434 | 31.06468404          | 22.71264939 |
| 3640 | 2975 | 5 | 0 | 18.36816823 | 31.06468404          | 34.06933034 |
| 3641 | 2961 | 5 | 0 | 9.62817107  | 23.67298888          | 38.9343418  |
| 3642 | 2962 | 5 | 0 | 12.63483496 | 23.67298889          | 50.29102275 |
| 3643 | 2963 | 5 | 0 | 10.03896801 | 23.67298888          | 4.86572396  |
| 3644 | 2964 | 5 | 0 | 13.04553759 | 23.67298888          | 16.2216924  |
| 3645 | 2965 | 5 | 0 | 16.05220148 | 23.67298888          | 27.57837335 |
| 3646 | 2966 | 5 | 0 | 11.49241208 | 23.72303369          | 27.45368428 |
| 3647 | 2967 | 5 | 0 | 14.49898166 | 23.72303369          | 38.81036523 |
| 3648 | 2968 | 5 | 0 | 17.50564556 | 23.72303369          | 50.16633367 |
| 3649 | 2969 | 5 | 0 | 14.9097786  | 23.72303368          | 4.74103489  |
| 3650 | 2970 | 5 | 0 | 17.91634819 | 23.72303369          | 16.09771584 |
| 3651 | 2976 | 5 | 0 | 10.6660086  | 31.01495202          | 56.25116053 |
| 3652 | 2977 | 5 | 0 | 11.07680554 | 31.01495202          | 22.18183019 |
| 3653 | 2978 | 5 | 0 | 14.08337512 | 31.01495202          | 33.53851114 |
| 3654 | 2979 | 5 | 0 | 17.09003901 | 31.01495202          | 44.89447958 |
| 3655 | 2980 | 5 | 0 | 17.50074164 | 31.01495202          | 10.82586175 |
| 3656 | 2971 | 5 | 0 | 11.94413782 | 27.58156596          | 45.42529879 |
| 3657 | 3052 | 5 | 0 | 18.77887086 | 27.58156596          | 0           |
| 3658 | 2973 | 5 | 0 | 12.35493475 | 27.58156596          | 11.35668095 |
| 3659 | 2974 | 5 | 0 | 15.36150434 | 27.58156596          | 22.71264939 |
| 3660 | 2975 | 5 | 0 | 18.36816823 | 27.58156596          | 34.06933034 |
| 3661 | 2961 | 5 | 0 | 11.38735519 | 25.41337541.10820675 |             |
| 3662 | 2962 | 5 | 0 | 14.39401909 | 25.41337552.46488771 |             |
| 3663 | 2963 | 5 | 0 | 11.79815213 | 25.4133757.03887641  |             |
| 3664 | 2964 | 5 | 0 | 14.80472172 | 25.41337518.39555736 |             |
| 3665 | 2965 | 5 | 0 | 17.81138561 | 25.41337529.75223831 |             |
| 3666 | 3041 | 5 | 0 | 17.50753168 | 25.41337541.3411972  |             |
| 3667 | 2962 | 5 | 0 | 11.08359557 | 25.41337552.69787815 |             |
| 3668 | 3043 | 5 | 0 | 17.91832861 | 25.4133757.27257936  |             |
| 3669 | 2964 | 5 | 0 | 11.4942982  | 25.41337518.6285478  |             |
| 3670 | 2965 | 5 | 0 | 14.50096209 | 25.41337529.98522876 |             |
| 3671 | 2966 | 5 | 0 | 12.99178317 | 25.41337524.99267819 |             |
| 3672 | 2967 | 5 | 0 | 15.99844706 | 25.41337536.34864663 |             |
| 3673 | 2888 | 5 | 0 | 9.57441665  | 25.41337547.70532759 |             |

|      |      |   |   |             |                      |             |
|------|------|---|---|-------------|----------------------|-------------|
| 3674 | 2969 | 5 | 0 | 16.40914969 | 25.4133752.2800288   |             |
| 3675 | 2890 | 5 | 0 | 9.98521359  | 25.41337513.63599724 |             |
| 3676 | 3056 | 5 | 0 | 17.53478611 | 29.32312555.17242191 |             |
| 3677 | 3057 | 5 | 0 | 17.94558305 | 29.32312521.10309156 |             |
| 3678 | 2978 | 5 | 0 | 11.52155263 | 29.32312532.45977251 |             |
| 3679 | 2979 | 5 | 0 | 14.52821652 | 29.32312543.81574095 |             |
| 3680 | 2980 | 5 | 0 | 14.93891915 | 29.3231259.74712312  |             |
| 3681 | 2976 | 5 | 0 | 10.76889645 | 29.32312553.21587219 |             |
| 3682 | 2977 | 5 | 0 | 11.17959908 | 29.32312519.14654185 |             |
| 3683 | 2978 | 5 | 0 | 14.18626297 | 29.32312530.5032228  |             |
| 3684 | 2979 | 5 | 0 | 17.19283255 | 29.32312541.85919124 |             |
| 3685 | 2980 | 5 | 0 | 17.60362949 | 29.3231257.79057341  |             |
| 3686 | 2971 | 5 | 0 | 13.89796953 | 29.32312547.50938761 |             |
| 3687 | 2972 | 5 | 0 | 11.30210257 | 29.3231252.08408882  |             |
| 3688 | 2973 | 5 | 0 | 14.30867216 | 29.32312513.44005727 |             |
| 3689 | 2974 | 5 | 0 | 17.31533605 | 29.32312524.79673822 |             |
| 3690 | 2895 | 5 | 0 | 10.89130563 | 29.32312536.15270666 |             |
| 3691 | 2971 | 5 | 0 | 10.44090018 | 29.32312547.78441609 |             |
| 3692 | 3052 | 5 | 0 | 17.27563322 | 29.3231252.3591173   |             |
| 3693 | 2973 | 5 | 0 | 10.85160281 | 29.32312513.71508574 |             |
| 3694 | 2974 | 5 | 0 | 13.8582667  | 29.32312525.07176669 |             |
| 3695 | 2975 | 5 | 0 | 16.86483629 | 29.32312536.42773513 |             |
| 3696 | 3096 | 5 | 0 | 11.65546715 | 29.32312541.4124481  |             |
| 3697 | 3097 | 5 | 0 | 14.66213104 | 29.32312552.76841654 |             |
| 3698 | 3098 | 5 | 0 | 12.06626409 | 29.3231257.34311775  |             |
| 3699 | 3099 | 5 | 0 | 15.07283367 | 29.32312518.69979871 |             |
| 3700 | 3100 | 5 | 0 | 18.07949757 | 29.32312530.05576715 |             |
| 3701 | 2981 | 5 | 0 | 19.05877107 | 3.69526112           | 38.9343418  |
| 3702 | 2982 | 5 | 0 | 22.06543496 | 3.69526112           | 50.29102275 |
| 3703 | 2983 | 5 | 0 | 19.46956801 | 3.69526111           | 4.86572396  |
| 3704 | 2984 | 5 | 0 | 22.47613759 | 3.69526111           | 16.2216924  |
| 3705 | 2985 | 5 | 0 | 25.48280148 | 3.69526111           | 27.57837335 |
| 3706 | 2986 | 5 | 0 | 20.92301208 | 3.64521631           | 27.45368428 |
| 3707 | 2987 | 5 | 0 | 23.92958166 | 3.64521631           | 38.81036523 |
| 3708 | 2988 | 5 | 0 | 26.93624556 | 3.64521631           | 50.16633367 |
| 3709 | 2989 | 5 | 0 | 24.3403786  | 3.64521631           | 4.74103489  |
| 3710 | 2990 | 5 | 0 | 27.34694819 | 3.64521631           | 16.09771584 |
| 3711 | 2996 | 5 | 0 | 20.0966086  | 4.17279798           | 56.25116053 |
| 3712 | 2997 | 5 | 0 | 20.50740554 | 4.17279798           | 22.18183019 |
| 3713 | 2998 | 5 | 0 | 23.51397512 | 4.17279798           | 33.53851114 |
| 3714 | 2999 | 5 | 0 | 26.52063901 | 4.17279798           | 44.89447958 |
| 3715 | 3000 | 5 | 0 | 26.93134164 | 4.17279798           | 10.82586175 |
| 3716 | 2991 | 5 | 0 | 21.37473782 | 7.60618404           | 45.42529879 |
| 3717 | 2832 | 5 | 0 | 28.20947086 | 7.60618404           | 0           |
| 3718 | 2993 | 5 | 0 | 21.78553475 | 7.60618404           | 11.35668095 |
| 3719 | 2994 | 5 | 0 | 24.79210434 | 7.60618404           | 22.71264939 |
| 3720 | 2995 | 5 | 0 | 27.79876823 | 7.60618404           | 34.06933034 |
| 3721 | 2981 | 5 | 0 | 19.05877107 | 0.21448888           | 38.9343418  |
| 3722 | 2982 | 5 | 0 | 22.06543496 | 0.21448889           | 50.29102275 |
| 3723 | 2983 | 5 | 0 | 19.46956801 | 0.21448888           | 4.86572396  |
| 3724 | 2984 | 5 | 0 | 22.47613759 | 0.21448888           | 16.2216924  |

|      |      |   |   |             |            |             |
|------|------|---|---|-------------|------------|-------------|
| 3725 | 2985 | 5 | 0 | 25.48280148 | 0.21448888 | 27.57837335 |
| 3726 | 2986 | 5 | 0 | 20.92301208 | 0.26453369 | 27.45368428 |
| 3727 | 2987 | 5 | 0 | 23.92958166 | 0.26453369 | 38.81036523 |
| 3728 | 2988 | 5 | 0 | 26.93624556 | 0.26453369 | 50.16633367 |
| 3729 | 2989 | 5 | 0 | 24.3403786  | 0.26453368 | 4.74103489  |
| 3730 | 2990 | 5 | 0 | 27.34694819 | 0.26453369 | 16.09771584 |
| 3731 | 2996 | 5 | 0 | 20.0966086  | 7.55645202 | 56.25116053 |
| 3732 | 2997 | 5 | 0 | 20.50740554 | 7.55645202 | 22.18183019 |
| 3733 | 2998 | 5 | 0 | 23.51397512 | 7.55645202 | 33.53851114 |
| 3734 | 2999 | 5 | 0 | 26.52063901 | 7.55645202 | 44.89447958 |
| 3735 | 3000 | 5 | 0 | 26.93134164 | 7.55645202 | 10.82586175 |
| 3736 | 2991 | 5 | 0 | 21.37473782 | 4.12306596 | 45.42529879 |
| 3737 | 2832 | 5 | 0 | 28.20947086 | 4.12306596 | 0           |
| 3738 | 2993 | 5 | 0 | 21.78553475 | 4.12306596 | 11.35668095 |
| 3739 | 2994 | 5 | 0 | 24.79210434 | 4.12306596 | 22.71264939 |
| 3740 | 2995 | 5 | 0 | 27.79876823 | 4.12306596 | 34.06933034 |
| 3741 | 2981 | 5 | 0 | 20.81795519 | 1.954875   | 41.10820675 |
| 3742 | 2982 | 5 | 0 | 23.82461909 | 1.954875   | 52.46488771 |
| 3743 | 2983 | 5 | 0 | 21.22875213 | 1.954875   | 7.03887641  |
| 3744 | 2984 | 5 | 0 | 24.23532172 | 1.954875   | 18.39555736 |
| 3745 | 2985 | 5 | 0 | 27.24198561 | 1.954875   | 29.75223831 |
| 3746 | 2821 | 5 | 0 | 26.93813168 | 1.954875   | 41.3411972  |
| 3747 | 2982 | 5 | 0 | 20.51419557 | 1.954875   | 52.69787815 |
| 3748 | 2823 | 5 | 0 | 27.34892861 | 1.954875   | 7.27257936  |
| 3749 | 2984 | 5 | 0 | 20.9248982  | 1.954875   | 18.6285478  |
| 3750 | 2985 | 5 | 0 | 23.93156209 | 1.954875   | 29.98522876 |
| 3751 | 2986 | 5 | 0 | 22.42238317 | 1.954875   | 24.99267819 |
| 3752 | 2987 | 5 | 0 | 25.42904706 | 1.954875   | 36.34864663 |
| 3753 | 2908 | 5 | 0 | 19.00501665 | 1.954875   | 47.70532759 |
| 3754 | 2989 | 5 | 0 | 25.83974969 | 1.954875   | 2.2800288   |
| 3755 | 2910 | 5 | 0 | 19.41581359 | 1.954875   | 13.63599724 |
| 3756 | 2836 | 5 | 0 | 26.96538611 | 5.864625   | 55.17242191 |
| 3757 | 2837 | 5 | 0 | 27.37618305 | 5.864625   | 21.10309156 |
| 3758 | 2998 | 5 | 0 | 20.95215263 | 5.864625   | 32.45977251 |
| 3759 | 2999 | 5 | 0 | 23.95881652 | 5.864625   | 43.81574095 |
| 3760 | 3000 | 5 | 0 | 24.36951915 | 5.864625   | 9.74712312  |
| 3761 | 2996 | 5 | 0 | 20.19949645 | 5.864625   | 53.21587219 |
| 3762 | 2997 | 5 | 0 | 20.61019908 | 5.864625   | 19.14654185 |
| 3763 | 2998 | 5 | 0 | 23.61686297 | 5.864625   | 30.5032228  |
| 3764 | 2999 | 5 | 0 | 26.62343255 | 5.864625   | 41.85919124 |
| 3765 | 3000 | 5 | 0 | 27.03422949 | 5.864625   | 7.79057341  |
| 3766 | 2991 | 5 | 0 | 23.32856953 | 5.864625   | 47.50938761 |
| 3767 | 2992 | 5 | 0 | 20.73270257 | 5.864625   | 2.08408882  |
| 3768 | 2993 | 5 | 0 | 23.73927216 | 5.864625   | 13.44005727 |
| 3769 | 2994 | 5 | 0 | 26.74593605 | 5.864625   | 24.79673822 |
| 3770 | 2915 | 5 | 0 | 20.32190563 | 5.864625   | 36.15270666 |
| 3771 | 2991 | 5 | 0 | 19.87150018 | 5.864625   | 47.78441609 |
| 3772 | 2832 | 5 | 0 | 26.70623322 | 5.864625   | 2.3591173   |
| 3773 | 2993 | 5 | 0 | 20.28220281 | 5.864625   | 13.71508574 |
| 3774 | 2994 | 5 | 0 | 23.2888667  | 5.864625   | 25.07176669 |
| 3775 | 2995 | 5 | 0 | 26.29543629 | 5.864625   | 36.42773513 |

|      |      |   |   |             |             |             |
|------|------|---|---|-------------|-------------|-------------|
| 3776 | 3101 | 5 | 0 | 21.08606715 | 5.864625    | 41.4124481  |
| 3777 | 3102 | 5 | 0 | 24.09273104 | 5.864625    | 52.76841654 |
| 3778 | 3103 | 5 | 0 | 21.49686409 | 5.864625    | 7.34311775  |
| 3779 | 3104 | 5 | 0 | 24.50343367 | 5.864625    | 18.69979871 |
| 3780 | 3105 | 5 | 0 | 27.51009757 | 5.864625    | 30.05576715 |
| 3781 | 3001 | 5 | 0 | 19.05877107 | 11.51476112 | 38.9343418  |
| 3782 | 3002 | 5 | 0 | 22.06543496 | 11.51476112 | 50.29102275 |
| 3783 | 3003 | 5 | 0 | 19.46956801 | 11.51476111 | 4.86572396  |
| 3784 | 3004 | 5 | 0 | 22.47613759 | 11.51476111 | 16.2216924  |
| 3785 | 3005 | 5 | 0 | 25.48280148 | 11.51476111 | 27.57837335 |
| 3786 | 3006 | 5 | 0 | 20.92301208 | 11.46471631 | 27.45368428 |
| 3787 | 3007 | 5 | 0 | 23.92958166 | 11.46471631 | 38.81036523 |
| 3788 | 3008 | 5 | 0 | 26.93624556 | 11.46471631 | 50.16633367 |
| 3789 | 3009 | 5 | 0 | 24.3403786  | 11.46471631 | 4.74103489  |
| 3790 | 3010 | 5 | 0 | 27.34694819 | 11.46471631 | 16.09771584 |
| 3791 | 3016 | 5 | 0 | 20.0966086  | 11.99229798 | 56.25116053 |
| 3792 | 3017 | 5 | 0 | 20.50740554 | 11.99229798 | 22.18183019 |
| 3793 | 3018 | 5 | 0 | 23.51397512 | 11.99229798 | 33.53851114 |
| 3794 | 3019 | 5 | 0 | 26.52063901 | 11.99229798 | 44.89447958 |
| 3795 | 3020 | 5 | 0 | 26.93134164 | 11.99229798 | 10.82586175 |
| 3796 | 3011 | 5 | 0 | 21.37473782 | 15.42568404 | 45.42529879 |
| 3797 | 2852 | 5 | 0 | 28.20947086 | 15.42568404 | 0           |
| 3798 | 3013 | 5 | 0 | 21.78553475 | 15.42568404 | 11.35668095 |
| 3799 | 3014 | 5 | 0 | 24.79210434 | 15.42568404 | 22.71264939 |
| 3800 | 3015 | 5 | 0 | 27.79876823 | 15.42568404 | 34.06933034 |
| 3801 | 3001 | 5 | 0 | 19.05877107 | 8.03398888  | 38.9343418  |
| 3802 | 3002 | 5 | 0 | 22.06543496 | 8.03398889  | 50.29102275 |
| 3803 | 3003 | 5 | 0 | 19.46956801 | 8.03398888  | 4.86572396  |
| 3804 | 3004 | 5 | 0 | 22.47613759 | 8.03398888  | 16.2216924  |
| 3805 | 3005 | 5 | 0 | 25.48280148 | 8.03398888  | 27.57837335 |
| 3806 | 3006 | 5 | 0 | 20.92301208 | 8.08403369  | 27.45368428 |
| 3807 | 3007 | 5 | 0 | 23.92958166 | 8.08403369  | 38.81036523 |
| 3808 | 3008 | 5 | 0 | 26.93624556 | 8.08403369  | 50.16633367 |
| 3809 | 3009 | 5 | 0 | 24.3403786  | 8.08403368  | 4.74103489  |
| 3810 | 3010 | 5 | 0 | 27.34694819 | 8.08403369  | 16.09771584 |
| 3811 | 3016 | 5 | 0 | 20.0966086  | 15.37595202 | 56.25116053 |
| 3812 | 3017 | 5 | 0 | 20.50740554 | 15.37595202 | 22.18183019 |
| 3813 | 3018 | 5 | 0 | 23.51397512 | 15.37595202 | 33.53851114 |
| 3814 | 3019 | 5 | 0 | 26.52063901 | 15.37595202 | 44.89447958 |
| 3815 | 3020 | 5 | 0 | 26.93134164 | 15.37595202 | 10.82586175 |
| 3816 | 3011 | 5 | 0 | 21.37473782 | 11.94256596 | 45.42529879 |
| 3817 | 2852 | 5 | 0 | 28.20947086 | 11.94256596 | 0           |
| 3818 | 3013 | 5 | 0 | 21.78553475 | 11.94256596 | 11.35668095 |
| 3819 | 3014 | 5 | 0 | 24.79210434 | 11.94256596 | 22.71264939 |
| 3820 | 3015 | 5 | 0 | 27.79876823 | 11.94256596 | 34.06933034 |
| 3821 | 3001 | 5 | 0 | 20.81795519 | 9.774375    | 41.10820675 |
| 3822 | 3002 | 5 | 0 | 23.82461909 | 9.774375    | 52.46488771 |
| 3823 | 3003 | 5 | 0 | 21.22875213 | 9.774375    | 7.03887641  |
| 3824 | 3004 | 5 | 0 | 24.23532172 | 9.774375    | 18.39555736 |
| 3825 | 3005 | 5 | 0 | 27.24198561 | 9.774375    | 29.75223831 |
| 3826 | 2841 | 5 | 0 | 26.93813168 | 9.774375    | 41.3411972  |

|      |      |   |   |             |             |             |
|------|------|---|---|-------------|-------------|-------------|
| 3827 | 3002 | 5 | 0 | 20.51419557 | 9.774375    | 52.69787815 |
| 3828 | 2843 | 5 | 0 | 27.34892861 | 9.774375    | 7.27257936  |
| 3829 | 3004 | 5 | 0 | 20.9248982  | 9.774375    | 18.6285478  |
| 3830 | 3005 | 5 | 0 | 23.93156209 | 9.774375    | 29.98522876 |
| 3831 | 3006 | 5 | 0 | 22.42238317 | 9.774375    | 24.99267819 |
| 3832 | 3007 | 5 | 0 | 25.42904706 | 9.774375    | 36.34864663 |
| 3833 | 2928 | 5 | 0 | 19.00501665 | 9.774375    | 47.70532759 |
| 3834 | 3009 | 5 | 0 | 25.83974969 | 9.774375    | 2.2800288   |
| 3835 | 2930 | 5 | 0 | 19.41581359 | 9.774375    | 13.63599724 |
| 3836 | 2856 | 5 | 0 | 26.96538611 | 13.684125   | 55.17242191 |
| 3837 | 2857 | 5 | 0 | 27.37618305 | 13.684125   | 21.10309156 |
| 3838 | 3018 | 5 | 0 | 20.95215263 | 13.684125   | 32.45977251 |
| 3839 | 3019 | 5 | 0 | 23.95881652 | 13.684125   | 43.81574095 |
| 3840 | 3020 | 5 | 0 | 24.36951915 | 13.684125   | 9.74712312  |
| 3841 | 3016 | 5 | 0 | 20.19949645 | 13.684125   | 53.21587219 |
| 3842 | 3017 | 5 | 0 | 20.61019908 | 13.684125   | 19.14654185 |
| 3843 | 3018 | 5 | 0 | 23.61686297 | 13.684125   | 30.5032228  |
| 3844 | 3019 | 5 | 0 | 26.62343255 | 13.684125   | 41.85919124 |
| 3845 | 3020 | 5 | 0 | 27.03422949 | 13.684125   | 7.79057341  |
| 3846 | 3011 | 5 | 0 | 23.32856953 | 13.684125   | 47.50938761 |
| 3847 | 3012 | 5 | 0 | 20.73270257 | 13.684125   | 2.08408882  |
| 3848 | 3013 | 5 | 0 | 23.73927216 | 13.684125   | 13.44005727 |
| 3849 | 3014 | 5 | 0 | 26.74593605 | 13.684125   | 24.79673822 |
| 3850 | 2935 | 5 | 0 | 20.32190563 | 13.684125   | 36.15270666 |
| 3851 | 3011 | 5 | 0 | 19.87150018 | 13.684125   | 47.78441609 |
| 3852 | 2852 | 5 | 0 | 26.70623322 | 13.684125   | 2.3591173   |
| 3853 | 3013 | 5 | 0 | 20.28220281 | 13.684125   | 13.71508574 |
| 3854 | 3014 | 5 | 0 | 23.2888667  | 13.684125   | 25.07176669 |
| 3855 | 3015 | 5 | 0 | 26.29543629 | 13.684125   | 36.42773513 |
| 3856 | 3106 | 5 | 0 | 21.08606715 | 13.684125   | 41.4124481  |
| 3857 | 3107 | 5 | 0 | 24.09273104 | 13.684125   | 52.76841654 |
| 3858 | 3108 | 5 | 0 | 21.49686409 | 13.684125   | 7.34311775  |
| 3859 | 3109 | 5 | 0 | 24.50343367 | 13.684125   | 18.69979871 |
| 3860 | 3110 | 5 | 0 | 27.51009757 | 13.684125   | 30.05576715 |
| 3861 | 3021 | 5 | 0 | 19.05877107 | 19.33426112 | 38.9343418  |
| 3862 | 3022 | 5 | 0 | 22.06543496 | 19.33426112 | 50.29102275 |
| 3863 | 3023 | 5 | 0 | 19.46956801 | 19.33426111 | 4.86572396  |
| 3864 | 3024 | 5 | 0 | 22.47613759 | 19.33426111 | 16.2216924  |
| 3865 | 3025 | 5 | 0 | 25.48280148 | 19.33426111 | 27.57837335 |
| 3866 | 3026 | 5 | 0 | 20.92301208 | 19.28421631 | 27.45368428 |
| 3867 | 3027 | 5 | 0 | 23.92958166 | 19.28421631 | 38.81036523 |
| 3868 | 3028 | 5 | 0 | 26.93624556 | 19.28421631 | 50.16633367 |
| 3869 | 3029 | 5 | 0 | 24.3403786  | 19.28421631 | 4.74103489  |
| 3870 | 3030 | 5 | 0 | 27.34694819 | 19.28421631 | 16.09771584 |
| 3871 | 3036 | 5 | 0 | 20.0966086  | 19.81179798 | 56.25116053 |
| 3872 | 3037 | 5 | 0 | 20.50740554 | 19.81179798 | 22.18183019 |
| 3873 | 3038 | 5 | 0 | 23.51397512 | 19.81179798 | 33.53851114 |
| 3874 | 3039 | 5 | 0 | 26.52063901 | 19.81179798 | 44.89447958 |
| 3875 | 3040 | 5 | 0 | 26.93134164 | 19.81179798 | 10.82586175 |
| 3876 | 3031 | 5 | 0 | 21.37473782 | 23.24518404 | 45.42529879 |
| 3877 | 2872 | 5 | 0 | 28.20947086 | 23.24518404 | 0           |

|      |      |   |   |             |                      |             |
|------|------|---|---|-------------|----------------------|-------------|
| 3878 | 3033 | 5 | 0 | 21.78553475 | 23.24518404          | 11.35668095 |
| 3879 | 3034 | 5 | 0 | 24.79210434 | 23.24518404          | 22.71264939 |
| 3880 | 3035 | 5 | 0 | 27.79876823 | 23.24518404          | 34.06933034 |
| 3881 | 3021 | 5 | 0 | 19.05877107 | 15.85348888          | 38.9343418  |
| 3882 | 3022 | 5 | 0 | 22.06543496 | 15.85348889          | 50.29102275 |
| 3883 | 3023 | 5 | 0 | 19.46956801 | 15.85348888          | 4.86572396  |
| 3884 | 3024 | 5 | 0 | 22.47613759 | 15.85348888          | 16.2216924  |
| 3885 | 3025 | 5 | 0 | 25.48280148 | 15.85348888          | 27.57837335 |
| 3886 | 3026 | 5 | 0 | 20.92301208 | 15.90353369          | 27.45368428 |
| 3887 | 3027 | 5 | 0 | 23.92958166 | 15.90353369          | 38.81036523 |
| 3888 | 3028 | 5 | 0 | 26.93624556 | 15.90353369          | 50.16633367 |
| 3889 | 3029 | 5 | 0 | 24.3403786  | 15.90353368          | 4.74103489  |
| 3890 | 3030 | 5 | 0 | 27.34694819 | 15.90353369          | 16.09771584 |
| 3891 | 3036 | 5 | 0 | 20.0966086  | 23.19545202          | 56.25116053 |
| 3892 | 3037 | 5 | 0 | 20.50740554 | 23.19545202          | 22.18183019 |
| 3893 | 3038 | 5 | 0 | 23.51397512 | 23.19545202          | 33.53851114 |
| 3894 | 3039 | 5 | 0 | 26.52063901 | 23.19545202          | 44.89447958 |
| 3895 | 3040 | 5 | 0 | 26.93134164 | 23.19545202          | 10.82586175 |
| 3896 | 3031 | 5 | 0 | 21.37473782 | 19.76206596          | 45.42529879 |
| 3897 | 2872 | 5 | 0 | 28.20947086 | 19.76206596          | 0           |
| 3898 | 3033 | 5 | 0 | 21.78553475 | 19.76206596          | 11.35668095 |
| 3899 | 3034 | 5 | 0 | 24.79210434 | 19.76206596          | 22.71264939 |
| 3900 | 3035 | 5 | 0 | 27.79876823 | 19.76206596          | 34.06933034 |
| 3901 | 3021 | 5 | 0 | 20.81795519 | 17.59387541.10820675 |             |
| 3902 | 3022 | 5 | 0 | 23.82461909 | 17.59387552.46488771 |             |
| 3903 | 3023 | 5 | 0 | 21.22875213 | 17.5938757.03887641  |             |
| 3904 | 3024 | 5 | 0 | 24.23532172 | 17.59387518.39555736 |             |
| 3905 | 3025 | 5 | 0 | 27.24198561 | 17.59387529.75223831 |             |
| 3906 | 2861 | 5 | 0 | 26.93813168 | 17.59387541.3411972  |             |
| 3907 | 3022 | 5 | 0 | 20.51419557 | 17.59387552.69787815 |             |
| 3908 | 2863 | 5 | 0 | 27.34892861 | 17.5938757.27257936  |             |
| 3909 | 3024 | 5 | 0 | 20.9248982  | 17.59387518.6285478  |             |
| 3910 | 3025 | 5 | 0 | 23.93156209 | 17.59387529.98522876 |             |
| 3911 | 3026 | 5 | 0 | 22.42238317 | 17.59387524.99267819 |             |
| 3912 | 3027 | 5 | 0 | 25.42904706 | 17.59387536.34864663 |             |
| 3913 | 2948 | 5 | 0 | 19.00501665 | 17.59387547.70532759 |             |
| 3914 | 3029 | 5 | 0 | 25.83974969 | 17.5938752.2800288   |             |
| 3915 | 2950 | 5 | 0 | 19.41581359 | 17.59387513.63599724 |             |
| 3916 | 2876 | 5 | 0 | 26.96538611 | 21.50362555.17242191 |             |
| 3917 | 2877 | 5 | 0 | 27.37618305 | 21.50362521.10309156 |             |
| 3918 | 3038 | 5 | 0 | 20.95215263 | 21.50362532.45977251 |             |
| 3919 | 3039 | 5 | 0 | 23.95881652 | 21.50362543.81574095 |             |
| 3920 | 3040 | 5 | 0 | 24.36951915 | 21.5036259.74712312  |             |
| 3921 | 3036 | 5 | 0 | 20.19949645 | 21.50362553.21587219 |             |
| 3922 | 3037 | 5 | 0 | 20.61019908 | 21.50362519.14654185 |             |
| 3923 | 3038 | 5 | 0 | 23.61686297 | 21.50362530.5032228  |             |
| 3924 | 3039 | 5 | 0 | 26.62343255 | 21.50362541.85919124 |             |
| 3925 | 3040 | 5 | 0 | 27.03422949 | 21.5036257.79057341  |             |
| 3926 | 3031 | 5 | 0 | 23.32856953 | 21.50362547.50938761 |             |
| 3927 | 3032 | 5 | 0 | 20.73270257 | 21.5036252.08408882  |             |
| 3928 | 3033 | 5 | 0 | 23.73927216 | 21.50362513.44005727 |             |

|      |      |   |   |             |             |             |
|------|------|---|---|-------------|-------------|-------------|
| 3929 | 3034 | 5 | 0 | 26.74593605 | 21.503625   | 24.79673822 |
| 3930 | 2955 | 5 | 0 | 20.32190563 | 21.503625   | 36.15270666 |
| 3931 | 3031 | 5 | 0 | 19.87150018 | 21.503625   | 47.78441609 |
| 3932 | 2872 | 5 | 0 | 26.70623322 | 21.503625   | 2.3591173   |
| 3933 | 3033 | 5 | 0 | 20.28220281 | 21.503625   | 13.71508574 |
| 3934 | 3034 | 5 | 0 | 23.2888667  | 21.503625   | 25.07176669 |
| 3935 | 3035 | 5 | 0 | 26.29543629 | 21.503625   | 36.42773513 |
| 3936 | 3111 | 5 | 0 | 21.08606715 | 21.503625   | 41.4124481  |
| 3937 | 3112 | 5 | 0 | 24.09273104 | 21.503625   | 52.76841654 |
| 3938 | 3113 | 5 | 0 | 21.49686409 | 21.503625   | 7.34311775  |
| 3939 | 3114 | 5 | 0 | 24.50343367 | 21.503625   | 18.69979871 |
| 3940 | 3115 | 5 | 0 | 27.51009757 | 21.503625   | 30.05576715 |
| 3941 | 3041 | 5 | 0 | 19.05877107 | 27.15376112 | 38.9343418  |
| 3942 | 3042 | 5 | 0 | 22.06543496 | 27.15376112 | 50.29102275 |
| 3943 | 3043 | 5 | 0 | 19.46956801 | 27.15376111 | 4.86572396  |
| 3944 | 3044 | 5 | 0 | 22.47613759 | 27.15376111 | 16.2216924  |
| 3945 | 3045 | 5 | 0 | 25.48280148 | 27.15376111 | 27.57837335 |
| 3946 | 3046 | 5 | 0 | 20.92301208 | 27.10371631 | 27.45368428 |
| 3947 | 3047 | 5 | 0 | 23.92958166 | 27.10371631 | 38.81036523 |
| 3948 | 3048 | 5 | 0 | 26.93624556 | 27.10371631 | 50.16633367 |
| 3949 | 3049 | 5 | 0 | 24.3403786  | 27.10371631 | 4.74103489  |
| 3950 | 3050 | 5 | 0 | 27.34694819 | 27.10371631 | 16.09771584 |
| 3951 | 3056 | 5 | 0 | 20.0966086  | 27.63129798 | 56.25116053 |
| 3952 | 3057 | 5 | 0 | 20.50740554 | 27.63129798 | 22.18183019 |
| 3953 | 3058 | 5 | 0 | 23.51397512 | 27.63129798 | 33.53851114 |
| 3954 | 3059 | 5 | 0 | 26.52063901 | 27.63129798 | 44.89447958 |
| 3955 | 3060 | 5 | 0 | 26.93134164 | 27.63129798 | 10.82586175 |
| 3956 | 3051 | 5 | 0 | 21.37473782 | 31.06468404 | 45.42529879 |
| 3957 | 2892 | 5 | 0 | 28.20947086 | 31.06468404 | 0           |
| 3958 | 3053 | 5 | 0 | 21.78553475 | 31.06468404 | 11.35668095 |
| 3959 | 3054 | 5 | 0 | 24.79210434 | 31.06468404 | 22.71264939 |
| 3960 | 3055 | 5 | 0 | 27.79876823 | 31.06468404 | 34.06933034 |
| 3961 | 3041 | 5 | 0 | 19.05877107 | 23.67298888 | 38.9343418  |
| 3962 | 3042 | 5 | 0 | 22.06543496 | 23.67298889 | 50.29102275 |
| 3963 | 3043 | 5 | 0 | 19.46956801 | 23.67298888 | 4.86572396  |
| 3964 | 3044 | 5 | 0 | 22.47613759 | 23.67298888 | 16.2216924  |
| 3965 | 3045 | 5 | 0 | 25.48280148 | 23.67298888 | 27.57837335 |
| 3966 | 3046 | 5 | 0 | 20.92301208 | 23.72303369 | 27.45368428 |
| 3967 | 3047 | 5 | 0 | 23.92958166 | 23.72303369 | 38.81036523 |
| 3968 | 3048 | 5 | 0 | 26.93624556 | 23.72303369 | 50.16633367 |
| 3969 | 3049 | 5 | 0 | 24.3403786  | 23.72303368 | 4.74103489  |
| 3970 | 3050 | 5 | 0 | 27.34694819 | 23.72303369 | 16.09771584 |
| 3971 | 3056 | 5 | 0 | 20.0966086  | 31.01495202 | 56.25116053 |
| 3972 | 3057 | 5 | 0 | 20.50740554 | 31.01495202 | 22.18183019 |
| 3973 | 3058 | 5 | 0 | 23.51397512 | 31.01495202 | 33.53851114 |
| 3974 | 3059 | 5 | 0 | 26.52063901 | 31.01495202 | 44.89447958 |
| 3975 | 3060 | 5 | 0 | 26.93134164 | 31.01495202 | 10.82586175 |
| 3976 | 3051 | 5 | 0 | 21.37473782 | 27.58156596 | 45.42529879 |
| 3977 | 2892 | 5 | 0 | 28.20947086 | 27.58156596 | 0           |
| 3978 | 3053 | 5 | 0 | 21.78553475 | 27.58156596 | 11.35668095 |
| 3979 | 3054 | 5 | 0 | 24.79210434 | 27.58156596 | 22.71264939 |

|      |      |   |   |                   |                      |             |
|------|------|---|---|-------------------|----------------------|-------------|
| 3980 | 3055 | 5 | 0 | 27.79876823       | 27.58156596          | 34.06933034 |
| 3981 | 3041 | 5 | 0 | 20.81795519       | 25.41337541.10820675 |             |
| 3982 | 3042 | 5 | 0 | 23.82461909       | 25.41337552.46488771 |             |
| 3983 | 3043 | 5 | 0 | 21.22875213       | 25.4133757.03887641  |             |
| 3984 | 3044 | 5 | 0 | 24.23532172       | 25.41337518.39555736 |             |
| 3985 | 3045 | 5 | 0 | 27.24198561       | 25.41337529.75223831 |             |
| 3986 | 2881 | 5 | 0 | 26.93813168       | 25.41337541.3411972  |             |
| 3987 | 3042 | 5 | 0 | 20.51419557       | 25.41337552.69787815 |             |
| 3988 | 2883 | 5 | 0 | 27.34892861       | 25.4133757.27257936  |             |
| 3989 | 3044 | 5 | 0 | 20.9248982        | 25.41337518.6285478  |             |
| 3990 | 3045 | 5 | 0 | 23.93156209       | 25.41337529.98522876 |             |
| 3991 | 3046 | 5 | 0 | 22.42238317       | 25.41337524.99267819 |             |
| 3992 | 3047 | 5 | 0 | 25.42904706       | 25.41337536.34864663 |             |
| 3993 | 2968 | 5 | 0 | 19.00501665       | 25.41337547.70532759 |             |
| 3994 | 3049 | 5 | 0 | 25.83974969       | 25.4133752.2800288   |             |
| 3995 | 2970 | 5 | 0 | 19.41581359       | 25.41337513.63599724 |             |
| 3996 | 2896 | 5 | 0 | 26.96538611       | 29.32312555.17242191 |             |
| 3997 | 2897 | 5 | 0 | 27.37618305       | 29.32312521.10309156 |             |
| 3998 | 3058 | 5 | 0 | 20.95215263       | 29.32312532.45977251 |             |
| 3999 | 3059 | 5 | 0 | 23.95881652       | 29.32312543.81574095 |             |
| 4000 | 3060 | 5 | 0 | 24.36951915       | 29.3231259.74712312  |             |
| 4001 | 3056 | 5 | 0 | 20.19949645       | 29.32312553.21587219 |             |
| 4002 | 3057 | 5 | 0 | 20.61019908       | 29.32312519.14654185 |             |
| 4003 | 3058 | 5 | 0 | 23.61686297       | 29.32312530.5032228  |             |
| 4004 | 3059 | 5 | 0 | 26.62343255       | 29.32312541.85919124 |             |
| 4005 | 3060 | 5 | 0 | 27.03422949       | 29.3231257.79057341  |             |
| 4006 | 3051 | 5 | 0 | 23.32856953       | 29.32312547.50938761 |             |
| 4007 | 3052 | 5 | 0 | 20.73270257       | 29.3231252.08408882  |             |
| 4008 | 3053 | 5 | 0 | 23.73927216       | 29.32312513.44005727 |             |
| 4009 | 3054 | 5 | 0 | 26.74593605       | 29.32312524.79673822 |             |
| 4010 | 2975 | 5 | 0 | 20.32190563       | 29.32312536.15270666 |             |
| 4011 | 3051 | 5 | 0 | 19.87150018       | 29.32312547.78441609 |             |
| 4012 | 2892 | 5 | 0 | 26.70623322       | 29.3231252.3591173   |             |
| 4013 | 3053 | 5 | 0 | 20.28220281       | 29.32312513.71508574 |             |
| 4014 | 3054 | 5 | 0 | 23.2888667        | 29.32312525.07176669 |             |
| 4015 | 3055 | 5 | 0 | 26.29543629       | 29.32312536.42773513 |             |
| 4016 | 3116 | 5 | 0 | 21.08606715       | 29.32312541.4124481  |             |
| 4017 | 3117 | 5 | 0 | 24.09273104       | 29.32312552.76841654 |             |
| 4018 | 3118 | 5 | 0 | 21.49686409       | 29.3231257.34311775  |             |
| 4019 | 3119 | 5 | 0 | 24.50343367       | 29.32312518.69979871 |             |
| 4020 | 3120 | 5 | 0 | 27.51009757       | 29.32312530.05576715 |             |
| 4021 | 2906 | 6 | 0 | 9.24594885        | 1.954875 25.10026705 |             |
| 4022 | 2827 | 6 | 0 | 2.82201274        | 1.954875 36.45623549 |             |
| 4023 | 2828 | 6 | 0 | 5.82858233        | 1.954875 47.81291644 |             |
| 4024 | 2829 | 6 | 0 | 3.23271537        | 1.954875 2.38761766  |             |
| 4025 | 2830 | 6 | 0 | 6.23937927        | 1.954875 13.7435861  |             |
| 4026 | 3121 | 6 | 0 | 1.75578911        | 1.954875 31.73657588 |             |
| 4027 | 3122 | 6 | 0 | 4.762453 1.954875 | 43.09254432          |             |
| 4028 | 3123 | 6 | 0 | 7.76902259        | 1.954875 54.44922527 |             |
| 4029 | 3124 | 6 | 0 | 5.17315563        | 1.954875 9.02392649  |             |
| 4030 | 3125 | 6 | 0 | 8.17981952        | 1.954875 20.37989493 |             |



|      |      |   |   |             |           |             |
|------|------|---|---|-------------|-----------|-------------|
| 4031 | 2926 | 6 | 0 | 9.24594885  | 9.774375  | 25.10026705 |
| 4032 | 2847 | 6 | 0 | 2.82201274  | 9.774375  | 36.45623549 |
| 4033 | 2848 | 6 | 0 | 5.82858233  | 9.774375  | 47.81291644 |
| 4034 | 2849 | 6 | 0 | 3.23271537  | 9.774375  | 2.38761766  |
| 4035 | 2850 | 6 | 0 | 6.23937927  | 9.774375  | 13.7435861  |
| 4036 | 3126 | 6 | 0 | 1.75578911  | 9.774375  | 31.73657588 |
| 4037 | 3127 | 6 | 0 | 4.762453    | 9.774375  | 43.09254432 |
| 4038 | 3128 | 6 | 0 | 7.76902259  | 9.774375  | 54.44922527 |
| 4039 | 3129 | 6 | 0 | 5.17315563  | 9.774375  | 9.02392649  |
| 4040 | 3130 | 6 | 0 | 8.17981952  | 9.774375  | 20.37989493 |
| 4041 | 2946 | 6 | 0 | 9.24594885  | 17.593875 | 25.10026705 |
| 4042 | 2867 | 6 | 0 | 2.82201274  | 17.593875 | 36.45623549 |
| 4043 | 2868 | 6 | 0 | 5.82858233  | 17.593875 | 47.81291644 |
| 4044 | 2869 | 6 | 0 | 3.23271537  | 17.593875 | 2.38761766  |
| 4045 | 2870 | 6 | 0 | 6.23937927  | 17.593875 | 13.7435861  |
| 4046 | 3131 | 6 | 0 | 1.75578911  | 17.593875 | 31.73657588 |
| 4047 | 3132 | 6 | 0 | 4.762453    | 17.593875 | 43.09254432 |
| 4048 | 3133 | 6 | 0 | 7.76902259  | 17.593875 | 54.44922527 |
| 4049 | 3134 | 6 | 0 | 5.17315563  | 17.593875 | 9.02392649  |
| 4050 | 3135 | 6 | 0 | 8.17981952  | 17.593875 | 20.37989493 |
| 4051 | 2966 | 6 | 0 | 9.24594885  | 25.413375 | 25.10026705 |
| 4052 | 2887 | 6 | 0 | 2.82201274  | 25.413375 | 36.45623549 |
| 4053 | 2888 | 6 | 0 | 5.82858233  | 25.413375 | 47.81291644 |
| 4054 | 2889 | 6 | 0 | 3.23271537  | 25.413375 | 2.38761766  |
| 4055 | 2890 | 6 | 0 | 6.23937927  | 25.413375 | 13.7435861  |
| 4056 | 3136 | 6 | 0 | 1.75578911  | 25.413375 | 31.73657588 |
| 4057 | 3137 | 6 | 0 | 4.762453    | 25.413375 | 43.09254432 |
| 4058 | 3138 | 6 | 0 | 7.76902259  | 25.413375 | 54.44922527 |
| 4059 | 3139 | 6 | 0 | 5.17315563  | 25.413375 | 9.02392649  |
| 4060 | 3140 | 6 | 0 | 8.17981952  | 25.413375 | 20.37989493 |
| 4061 | 2986 | 6 | 0 | 18.67654885 | 1.954875  | 25.10026705 |
| 4062 | 2907 | 6 | 0 | 12.25261274 | 1.954875  | 36.45623549 |
| 4063 | 2908 | 6 | 0 | 15.25918233 | 1.954875  | 47.81291644 |
| 4064 | 2909 | 6 | 0 | 12.66331537 | 1.954875  | 2.38761766  |
| 4065 | 2910 | 6 | 0 | 15.66997927 | 1.954875  | 13.7435861  |
| 4066 | 3141 | 6 | 0 | 11.18638911 | 1.954875  | 31.73657588 |
| 4067 | 3142 | 6 | 0 | 14.193053   | 1.954875  | 43.09254432 |
| 4068 | 3143 | 6 | 0 | 17.19962259 | 1.954875  | 54.44922527 |
| 4069 | 3144 | 6 | 0 | 14.60375563 | 1.954875  | 9.02392649  |
| 4070 | 3145 | 6 | 0 | 17.61041952 | 1.954875  | 20.37989493 |
| 4071 | 3006 | 6 | 0 | 18.67654885 | 9.774375  | 25.10026705 |
| 4072 | 2927 | 6 | 0 | 12.25261274 | 9.774375  | 36.45623549 |
| 4073 | 2928 | 6 | 0 | 15.25918233 | 9.774375  | 47.81291644 |
| 4074 | 2929 | 6 | 0 | 12.66331537 | 9.774375  | 2.38761766  |
| 4075 | 2930 | 6 | 0 | 15.66997927 | 9.774375  | 13.7435861  |
| 4076 | 3146 | 6 | 0 | 11.18638911 | 9.774375  | 31.73657588 |
| 4077 | 3147 | 6 | 0 | 14.193053   | 9.774375  | 43.09254432 |
| 4078 | 3148 | 6 | 0 | 17.19962259 | 9.774375  | 54.44922527 |
| 4079 | 3149 | 6 | 0 | 14.60375563 | 9.774375  | 9.02392649  |
| 4080 | 3150 | 6 | 0 | 17.61041952 | 9.774375  | 20.37989493 |
| 4081 | 3026 | 6 | 0 | 18.67654885 | 17.593875 | 25.10026705 |

|      |      |   |   |             |                       |
|------|------|---|---|-------------|-----------------------|
| 4082 | 2947 | 6 | 0 | 12.25261274 | 17.593875 36.45623549 |
| 4083 | 2948 | 6 | 0 | 15.25918233 | 17.593875 47.81291644 |
| 4084 | 2949 | 6 | 0 | 12.66331537 | 17.593875 2.38761766  |
| 4085 | 2950 | 6 | 0 | 15.66997927 | 17.593875 13.7435861  |
| 4086 | 3151 | 6 | 0 | 11.18638911 | 17.593875 31.73657588 |
| 4087 | 3152 | 6 | 0 | 14.193053   | 17.593875 43.09254432 |
| 4088 | 3153 | 6 | 0 | 17.19962259 | 17.593875 54.44922527 |
| 4089 | 3154 | 6 | 0 | 14.60375563 | 17.593875 9.02392649  |
| 4090 | 3155 | 6 | 0 | 17.61041952 | 17.593875 20.37989493 |
| 4091 | 3046 | 6 | 0 | 18.67654885 | 25.413375 25.10026705 |
| 4092 | 2967 | 6 | 0 | 12.25261274 | 25.413375 36.45623549 |
| 4093 | 2968 | 6 | 0 | 15.25918233 | 25.413375 47.81291644 |
| 4094 | 2969 | 6 | 0 | 12.66331537 | 25.413375 2.38761766  |
| 4095 | 2970 | 6 | 0 | 15.66997927 | 25.413375 13.7435861  |
| 4096 | 3156 | 6 | 0 | 11.18638911 | 25.413375 31.73657588 |
| 4097 | 3157 | 6 | 0 | 14.193053   | 25.413375 43.09254432 |
| 4098 | 3158 | 6 | 0 | 17.19962259 | 25.413375 54.44922527 |
| 4099 | 3159 | 6 | 0 | 14.60375563 | 25.413375 9.02392649  |
| 4100 | 3160 | 6 | 0 | 17.61041952 | 25.413375 20.37989493 |
| 4101 | 2826 | 6 | 0 | 28.10714885 | 1.954875 25.10026705  |
| 4102 | 2987 | 6 | 0 | 21.68321274 | 1.954875 36.45623549  |
| 4103 | 2988 | 6 | 0 | 24.68978233 | 1.954875 47.81291644  |
| 4104 | 2989 | 6 | 0 | 22.09391537 | 1.954875 2.38761766   |
| 4105 | 2990 | 6 | 0 | 25.10057927 | 1.954875 13.7435861   |
| 4106 | 3161 | 6 | 0 | 20.61698911 | 1.954875 31.73657588  |
| 4107 | 3162 | 6 | 0 | 23.623653   | 1.954875 43.09254432  |
| 4108 | 3163 | 6 | 0 | 26.63022259 | 1.954875 54.44922527  |
| 4109 | 3164 | 6 | 0 | 24.03435563 | 1.954875 9.02392649   |
| 4110 | 3165 | 6 | 0 | 27.04101952 | 1.954875 20.37989493  |
| 4111 | 2846 | 6 | 0 | 28.10714885 | 9.774375 25.10026705  |
| 4112 | 3007 | 6 | 0 | 21.68321274 | 9.774375 36.45623549  |
| 4113 | 3008 | 6 | 0 | 24.68978233 | 9.774375 47.81291644  |
| 4114 | 3009 | 6 | 0 | 22.09391537 | 9.774375 2.38761766   |
| 4115 | 3010 | 6 | 0 | 25.10057927 | 9.774375 13.7435861   |
| 4116 | 3166 | 6 | 0 | 20.61698911 | 9.774375 31.73657588  |
| 4117 | 3167 | 6 | 0 | 23.623653   | 9.774375 43.09254432  |
| 4118 | 3168 | 6 | 0 | 26.63022259 | 9.774375 54.44922527  |
| 4119 | 3169 | 6 | 0 | 24.03435563 | 9.774375 9.02392649   |
| 4120 | 3170 | 6 | 0 | 27.04101952 | 9.774375 20.37989493  |
| 4121 | 2866 | 6 | 0 | 28.10714885 | 17.593875 25.10026705 |
| 4122 | 3027 | 6 | 0 | 21.68321274 | 17.593875 36.45623549 |
| 4123 | 3028 | 6 | 0 | 24.68978233 | 17.593875 47.81291644 |
| 4124 | 3029 | 6 | 0 | 22.09391537 | 17.593875 2.38761766  |
| 4125 | 3030 | 6 | 0 | 25.10057927 | 17.593875 13.7435861  |
| 4126 | 3171 | 6 | 0 | 20.61698911 | 17.593875 31.73657588 |
| 4127 | 3172 | 6 | 0 | 23.623653   | 17.593875 43.09254432 |
| 4128 | 3173 | 6 | 0 | 26.63022259 | 17.593875 54.44922527 |
| 4129 | 3174 | 6 | 0 | 24.03435563 | 17.593875 9.02392649  |
| 4130 | 3175 | 6 | 0 | 27.04101952 | 17.593875 20.37989493 |
| 4131 | 2886 | 6 | 0 | 28.10714885 | 25.413375 25.10026705 |
| 4132 | 3047 | 6 | 0 | 21.68321274 | 25.413375 36.45623549 |

|      |      |   |   |                               |                         |
|------|------|---|---|-------------------------------|-------------------------|
| 4133 | 3048 | 6 | 0 | 24.68978233                   | 25.41337547.81291644    |
| 4134 | 3049 | 6 | 0 | 22.09391537                   | 25.4133752.38761766     |
| 4135 | 3050 | 6 | 0 | 25.10057927                   | 25.41337513.7435861     |
| 4136 | 3176 | 6 | 0 | 20.61698911                   | 25.41337531.73657588    |
| 4137 | 3177 | 6 | 0 | 23.62365325.41337543.09254432 |                         |
| 4138 | 3178 | 6 | 0 | 26.63022259                   | 25.41337554.44922527    |
| 4139 | 3179 | 6 | 0 | 24.03435563                   | 25.4133759.02392649     |
| 4140 | 3180 | 6 | 0 | 27.04101952                   | 25.41337520.37989493    |
| 4141 | 3181 | 7 | 0 | 2.357650362                   | 0.86883411 85.16727226  |
| 4142 | 3182 | 7 | 0 | 7.072951105                   | 1.73766822 86.5839708   |
| 4143 | 3183 | 7 | 0 | 25.93414963                   | 0 86.5839708            |
| 4144 | 3184 | 7 | 0 | 16.50355257                   | 0.86883411 85.16727226  |
| 4145 | 3185 | 7 | 0 | 21.21885331                   | 1.73766822 86.5839708   |
| 4146 | 3186 | 7 | 0 | 11.78825184                   | 0 86.5839708            |
| 4147 | 3187 | 7 | 0 | 2.357650362                   | 3.475336426 86.5839708  |
| 4148 | 3188 | 7 | 0 | 16.50355257                   | 3.475336426 86.5839708  |
| 4149 | 3189 | 7 | 0 | 2.357650362                   | 0.86883411 82.33387518  |
| 4150 | 3190 | 7 | 0 | 7.072951105                   | 1.73766822 83.75057372  |
| 4151 | 3191 | 7 | 0 | 25.93414963                   | 0 83.75057372           |
| 4152 | 3192 | 7 | 0 | 16.50355257                   | 0.86883411 82.33387518  |
| 4153 | 3193 | 7 | 0 | 21.21885331                   | 1.73766822 83.75057372  |
| 4154 | 3194 | 7 | 0 | 11.78825184                   | 0 83.75057372           |
| 4155 | 3195 | 7 | 0 | 2.357650362                   | 3.475336426 83.75057372 |
| 4156 | 3196 | 7 | 0 | 7.072951105                   | 4.34417054 85.16727226  |
| 4157 | 3197 | 7 | 0 | 25.93414963                   | 2.60650232 85.16727226  |
| 4158 | 3198 | 7 | 0 | 16.50355257                   | 3.475336426 83.75057372 |
| 4159 | 3199 | 7 | 0 | 21.21885331                   | 4.34417054 85.16727226  |
| 4160 | 3200 | 7 | 0 | 11.78825184                   | 2.60650232 85.16727226  |
| 4161 | 3201 | 7 | 0 | 2.357650362                   | 6.081838745 85.16727226 |
| 4162 | 3202 | 7 | 0 | 7.072951105                   | 6.950672859 86.5839708  |
| 4163 | 3203 | 7 | 0 | 25.93414963                   | 5.213004642 86.5839708  |
| 4164 | 3204 | 7 | 0 | 16.50355257                   | 6.081838745 85.16727226 |
| 4165 | 3205 | 7 | 0 | 21.21885331                   | 6.950672859 86.5839708  |
| 4166 | 3206 | 7 | 0 | 11.78825184                   | 5.213004642 86.5839708  |
| 4167 | 3207 | 7 | 0 | 2.357650362                   | 8.688341064 86.5839708  |
| 4168 | 3208 | 7 | 0 | 16.50355257                   | 8.688341064 86.5839708  |
| 4169 | 3209 | 7 | 0 | 2.357650362                   | 0.86883411 79.5004781   |
| 4170 | 3210 | 7 | 0 | 7.072951105                   | 1.73766822 80.91717664  |
| 4171 | 3211 | 7 | 0 | 25.93414963                   | 0 80.91717664           |
| 4172 | 3212 | 7 | 0 | 16.50355257                   | 0.86883411 79.5004781   |
| 4173 | 3213 | 7 | 0 | 21.21885331                   | 1.73766822 80.91717664  |
| 4174 | 3214 | 7 | 0 | 11.78825184                   | 0 80.91717664           |
| 4175 | 3215 | 7 | 0 | 2.357650362                   | 3.475336426 80.91717664 |
| 4176 | 3216 | 7 | 0 | 7.072951105                   | 4.34417054 82.33387518  |
| 4177 | 3217 | 7 | 0 | 25.93414963                   | 2.60650232 82.33387518  |
| 4178 | 3218 | 7 | 0 | 16.50355257                   | 3.475336426 80.91717664 |
| 4179 | 3219 | 7 | 0 | 21.21885331                   | 4.34417054 82.33387518  |
| 4180 | 3220 | 7 | 0 | 11.78825184                   | 2.60650232 82.33387518  |
| 4181 | 3221 | 7 | 0 | 2.357650362                   | 6.081838745 82.33387518 |
| 4182 | 3222 | 7 | 0 | 7.072951105                   | 6.950672859 83.75057372 |
| 4183 | 3223 | 7 | 0 | 25.93414963                   | 5.213004642 83.75057372 |

|      |      |   |   |             |             |             |
|------|------|---|---|-------------|-------------|-------------|
| 4184 | 3224 | 7 | 0 | 16.50355257 | 6.081838745 | 82.33387518 |
| 4185 | 3225 | 7 | 0 | 21.21885331 | 6.950672859 | 83.75057372 |
| 4186 | 3226 | 7 | 0 | 11.78825184 | 5.213004642 | 83.75057372 |
| 4187 | 3227 | 7 | 0 | 2.357650362 | 8.688341064 | 83.75057372 |
| 4188 | 3228 | 7 | 0 | 7.072951105 | 9.557175178 | 85.16727226 |
| 4189 | 3229 | 7 | 0 | 25.93414963 | 7.819506962 | 85.16727226 |
| 4190 | 3230 | 7 | 0 | 16.50355257 | 8.688341064 | 83.75057372 |
| 4191 | 3231 | 7 | 0 | 21.21885331 | 9.557175178 | 85.16727226 |
| 4192 | 3232 | 7 | 0 | 11.78825184 | 7.819506962 | 85.16727226 |
| 4193 | 3233 | 7 | 0 | 2.357650362 | 11.29484338 | 85.16727226 |
| 4194 | 3234 | 7 | 0 | 7.072951105 | 12.1636775  | 86.5839708  |
| 4195 | 3235 | 7 | 0 | 25.93414963 | 10.42600928 | 86.5839708  |
| 4196 | 3236 | 7 | 0 | 16.50355257 | 11.29484338 | 85.16727226 |
| 4197 | 3237 | 7 | 0 | 21.21885331 | 12.1636775  | 86.5839708  |
| 4198 | 3238 | 7 | 0 | 11.78825184 | 10.42600928 | 86.5839708  |
| 4199 | 3239 | 7 | 0 | 2.357650362 | 13.9013457  | 86.5839708  |
| 4200 | 3240 | 7 | 0 | 16.50355257 | 13.9013457  | 86.5839708  |
| 4201 | 3241 | 7 | 0 | 2.357650362 | 0.86883411  | 76.66708102 |
| 4202 | 3242 | 7 | 0 | 7.072951105 | 1.73766822  | 78.08377956 |
| 4203 | 3243 | 7 | 0 | 25.93414963 | 0           | 78.08377956 |
| 4204 | 3244 | 7 | 0 | 16.50355257 | 0.86883411  | 76.66708102 |
| 4205 | 3245 | 7 | 0 | 21.21885331 | 1.73766822  | 78.08377956 |
| 4206 | 3246 | 7 | 0 | 11.78825184 | 0           | 78.08377956 |
| 4207 | 3247 | 7 | 0 | 2.357650362 | 3.475336426 | 78.08377956 |
| 4208 | 3248 | 7 | 0 | 7.072951105 | 4.34417054  | 79.5004781  |
| 4209 | 3249 | 7 | 0 | 25.93414963 | 2.60650232  | 79.5004781  |
| 4210 | 3250 | 7 | 0 | 16.50355257 | 3.475336426 | 78.08377956 |
| 4211 | 3251 | 7 | 0 | 21.21885331 | 4.34417054  | 79.5004781  |
| 4212 | 3252 | 7 | 0 | 11.78825184 | 2.60650232  | 79.5004781  |
| 4213 | 3253 | 7 | 0 | 2.357650362 | 6.081838745 | 79.5004781  |
| 4214 | 3254 | 7 | 0 | 7.072951105 | 6.950672859 | 80.91717664 |
| 4215 | 3255 | 7 | 0 | 25.93414963 | 5.213004642 | 80.91717664 |
| 4216 | 3256 | 7 | 0 | 16.50355257 | 6.081838745 | 79.5004781  |
| 4217 | 3257 | 7 | 0 | 21.21885331 | 6.950672859 | 80.91717664 |
| 4218 | 3258 | 7 | 0 | 11.78825184 | 5.213004642 | 80.91717664 |
| 4219 | 3259 | 7 | 0 | 2.357650362 | 8.688341064 | 80.91717664 |
| 4220 | 3260 | 7 | 0 | 7.072951105 | 9.557175178 | 82.33387518 |
| 4221 | 3261 | 7 | 0 | 25.93414963 | 7.819506962 | 82.33387518 |
| 4222 | 3262 | 7 | 0 | 16.50355257 | 8.688341064 | 80.91717664 |
| 4223 | 3263 | 7 | 0 | 21.21885331 | 9.557175178 | 82.33387518 |
| 4224 | 3264 | 7 | 0 | 11.78825184 | 7.819506962 | 82.33387518 |
| 4225 | 3265 | 7 | 0 | 2.357650362 | 11.29484338 | 82.33387518 |
| 4226 | 3266 | 7 | 0 | 7.072951105 | 12.1636775  | 83.75057372 |
| 4227 | 3267 | 7 | 0 | 25.93414963 | 10.42600928 | 83.75057372 |
| 4228 | 3268 | 7 | 0 | 16.50355257 | 11.29484338 | 82.33387518 |
| 4229 | 3269 | 7 | 0 | 21.21885331 | 12.1636775  | 83.75057372 |
| 4230 | 3270 | 7 | 0 | 11.78825184 | 10.42600928 | 83.75057372 |
| 4231 | 3271 | 7 | 0 | 2.357650362 | 13.9013457  | 83.75057372 |
| 4232 | 3272 | 7 | 0 | 7.072951105 | 14.77017982 | 85.16727226 |
| 4233 | 3273 | 7 | 0 | 25.93414963 | 13.0325116  | 85.16727226 |
| 4234 | 3274 | 7 | 0 | 16.50355257 | 13.9013457  | 83.75057372 |

|      |      |   |   |             |             |             |
|------|------|---|---|-------------|-------------|-------------|
| 4235 | 3275 | 7 | 0 | 21.21885331 | 14.77017982 | 85.16727226 |
| 4236 | 3276 | 7 | 0 | 11.78825184 | 13.0325116  | 85.16727226 |
| 4237 | 3277 | 7 | 0 | 2.357650362 | 16.50784802 | 85.16727226 |
| 4238 | 3278 | 7 | 0 | 7.072951105 | 17.37668214 | 86.5839708  |
| 4239 | 3279 | 7 | 0 | 25.93414963 | 15.63901392 | 86.5839708  |
| 4240 | 3280 | 7 | 0 | 16.50355257 | 16.50784802 | 85.16727226 |
| 4241 | 3281 | 7 | 0 | 21.21885331 | 17.37668214 | 86.5839708  |
| 4242 | 3282 | 7 | 0 | 11.78825184 | 15.63901392 | 86.5839708  |
| 4243 | 3283 | 7 | 0 | 2.357650362 | 19.11435034 | 86.5839708  |
| 4244 | 3284 | 7 | 0 | 16.50355257 | 19.11435034 | 86.5839708  |
| 4245 | 3285 | 7 | 0 | 2.357650362 | 0.86883411  | 73.83368394 |
| 4246 | 3286 | 7 | 0 | 7.072951105 | 1.73766822  | 75.25038248 |
| 4247 | 3287 | 7 | 0 | 25.93414963 | 0           | 75.25038248 |
| 4248 | 3288 | 7 | 0 | 16.50355257 | 0.86883411  | 73.83368394 |
| 4249 | 3289 | 7 | 0 | 21.21885331 | 1.73766822  | 75.25038248 |
| 4250 | 3290 | 7 | 0 | 11.78825184 | 0           | 75.25038248 |
| 4251 | 3291 | 7 | 0 | 2.357650362 | 3.475336426 | 75.25038248 |
| 4252 | 3292 | 7 | 0 | 7.072951105 | 4.34417054  | 76.66708102 |
| 4253 | 3293 | 7 | 0 | 25.93414963 | 2.60650232  | 76.66708102 |
| 4254 | 3294 | 7 | 0 | 16.50355257 | 3.475336426 | 75.25038248 |
| 4255 | 3295 | 7 | 0 | 21.21885331 | 4.34417054  | 76.66708102 |
| 4256 | 3296 | 7 | 0 | 11.78825184 | 2.60650232  | 76.66708102 |
| 4257 | 3297 | 7 | 0 | 2.357650362 | 6.081838745 | 76.66708102 |
| 4258 | 3298 | 7 | 0 | 7.072951105 | 6.950672859 | 78.08377956 |
| 4259 | 3299 | 7 | 0 | 25.93414963 | 5.213004642 | 78.08377956 |
| 4260 | 3300 | 7 | 0 | 16.50355257 | 6.081838745 | 76.66708102 |
| 4261 | 3301 | 7 | 0 | 21.21885331 | 6.950672859 | 78.08377956 |
| 4262 | 3302 | 7 | 0 | 11.78825184 | 5.213004642 | 78.08377956 |
| 4263 | 3303 | 7 | 0 | 2.357650362 | 8.688341064 | 78.08377956 |
| 4264 | 3304 | 7 | 0 | 7.072951105 | 9.557175178 | 79.5004781  |
| 4265 | 3305 | 7 | 0 | 25.93414963 | 7.819506962 | 79.5004781  |
| 4266 | 3306 | 7 | 0 | 16.50355257 | 8.688341064 | 78.08377956 |
| 4267 | 3307 | 7 | 0 | 21.21885331 | 9.557175178 | 79.5004781  |
| 4268 | 3308 | 7 | 0 | 11.78825184 | 7.819506962 | 79.5004781  |
| 4269 | 3309 | 7 | 0 | 2.357650362 | 11.29484338 | 79.5004781  |
| 4270 | 3310 | 7 | 0 | 7.072951105 | 12.1636775  | 80.91717664 |
| 4271 | 3311 | 7 | 0 | 25.93414963 | 10.42600928 | 80.91717664 |
| 4272 | 3312 | 7 | 0 | 16.50355257 | 11.29484338 | 79.5004781  |
| 4273 | 3313 | 7 | 0 | 21.21885331 | 12.1636775  | 80.91717664 |
| 4274 | 3314 | 7 | 0 | 11.78825184 | 10.42600928 | 80.91717664 |
| 4275 | 3315 | 7 | 0 | 2.357650362 | 13.9013457  | 80.91717664 |
| 4276 | 3316 | 7 | 0 | 7.072951105 | 14.77017982 | 82.33387518 |
| 4277 | 3317 | 7 | 0 | 25.93414963 | 13.0325116  | 82.33387518 |
| 4278 | 3318 | 7 | 0 | 16.50355257 | 13.9013457  | 80.91717664 |
| 4279 | 3319 | 7 | 0 | 21.21885331 | 14.77017982 | 82.33387518 |
| 4280 | 3320 | 7 | 0 | 11.78825184 | 13.0325116  | 82.33387518 |
| 4281 | 3321 | 7 | 0 | 2.357650362 | 16.50784802 | 82.33387518 |
| 4282 | 3322 | 7 | 0 | 7.072951105 | 17.37668214 | 83.75057372 |
| 4283 | 3323 | 7 | 0 | 25.93414963 | 15.63901392 | 83.75057372 |
| 4284 | 3324 | 7 | 0 | 16.50355257 | 16.50784802 | 82.33387518 |
| 4285 | 3325 | 7 | 0 | 21.21885331 | 17.37668214 | 83.75057372 |

|      |      |   |   |             |             |             |
|------|------|---|---|-------------|-------------|-------------|
| 4286 | 3326 | 7 | 0 | 11.78825184 | 15.63901392 | 83.75057372 |
| 4287 | 3327 | 7 | 0 | 2.357650362 | 19.11435034 | 83.75057372 |
| 4288 | 3328 | 7 | 0 | 7.072951105 | 19.98318446 | 85.16727226 |
| 4289 | 3329 | 7 | 0 | 25.93414963 | 18.24551624 | 85.16727226 |
| 4290 | 3330 | 7 | 0 | 16.50355257 | 19.11435034 | 83.75057372 |
| 4291 | 3331 | 7 | 0 | 21.21885331 | 19.98318446 | 85.16727226 |
| 4292 | 3332 | 7 | 0 | 11.78825184 | 18.24551624 | 85.16727226 |
| 4293 | 3333 | 7 | 0 | 2.357650362 | 21.72085266 | 85.16727226 |
| 4294 | 3334 | 7 | 0 | 7.072951105 | 22.58968677 | 86.5839708  |
| 4295 | 3335 | 7 | 0 | 25.93414963 | 20.85201856 | 86.5839708  |
| 4296 | 3336 | 7 | 0 | 16.50355257 | 21.72085266 | 85.16727226 |
| 4297 | 3337 | 7 | 0 | 21.21885331 | 22.58968677 | 86.5839708  |
| 4298 | 3338 | 7 | 0 | 11.78825184 | 20.85201856 | 86.5839708  |
| 4299 | 3339 | 7 | 0 | 2.357650362 | 24.32735498 | 86.5839708  |
| 4300 | 3340 | 7 | 0 | 16.50355257 | 24.32735498 | 86.5839708  |
| 4301 | 3341 | 7 | 0 | 2.357650362 | 0.86883411  | 71.00028686 |
| 4302 | 3342 | 7 | 0 | 7.072951105 | 1.73766822  | 72.4169854  |
| 4303 | 3343 | 7 | 0 | 25.93414963 | 0           | 72.4169854  |
| 4304 | 3344 | 7 | 0 | 16.50355257 | 0.86883411  | 71.00028686 |
| 4305 | 3345 | 7 | 0 | 21.21885331 | 1.73766822  | 72.4169854  |
| 4306 | 3346 | 7 | 0 | 11.78825184 | 0           | 72.4169854  |
| 4307 | 3347 | 7 | 0 | 2.357650362 | 3.475336426 | 72.4169854  |
| 4308 | 3348 | 7 | 0 | 7.072951105 | 4.34417054  | 73.83368394 |
| 4309 | 3349 | 7 | 0 | 25.93414963 | 2.60650232  | 73.83368394 |
| 4310 | 3350 | 7 | 0 | 16.50355257 | 3.475336426 | 72.4169854  |
| 4311 | 3351 | 7 | 0 | 21.21885331 | 4.34417054  | 73.83368394 |
| 4312 | 3352 | 7 | 0 | 11.78825184 | 2.60650232  | 73.83368394 |
| 4313 | 3353 | 7 | 0 | 2.357650362 | 6.081838745 | 73.83368394 |
| 4314 | 3354 | 7 | 0 | 7.072951105 | 6.950672859 | 75.25038248 |
| 4315 | 3355 | 7 | 0 | 25.93414963 | 5.213004642 | 75.25038248 |
| 4316 | 3356 | 7 | 0 | 16.50355257 | 6.081838745 | 73.83368394 |
| 4317 | 3357 | 7 | 0 | 21.21885331 | 6.950672859 | 75.25038248 |
| 4318 | 3358 | 7 | 0 | 11.78825184 | 5.213004642 | 75.25038248 |
| 4319 | 3359 | 7 | 0 | 2.357650362 | 8.688341064 | 75.25038248 |
| 4320 | 3360 | 7 | 0 | 7.072951105 | 9.557175178 | 76.66708102 |
| 4321 | 3361 | 7 | 0 | 25.93414963 | 7.819506962 | 76.66708102 |
| 4322 | 3362 | 7 | 0 | 16.50355257 | 8.688341064 | 75.25038248 |
| 4323 | 3363 | 7 | 0 | 21.21885331 | 9.557175178 | 76.66708102 |
| 4324 | 3364 | 7 | 0 | 11.78825184 | 7.819506962 | 76.66708102 |
| 4325 | 3365 | 7 | 0 | 2.357650362 | 11.29484338 | 76.66708102 |
| 4326 | 3366 | 7 | 0 | 7.072951105 | 12.1636775  | 78.08377956 |
| 4327 | 3367 | 7 | 0 | 25.93414963 | 10.42600928 | 78.08377956 |
| 4328 | 3368 | 7 | 0 | 16.50355257 | 11.29484338 | 76.66708102 |
| 4329 | 3369 | 7 | 0 | 21.21885331 | 12.1636775  | 78.08377956 |
| 4330 | 3370 | 7 | 0 | 11.78825184 | 10.42600928 | 78.08377956 |
| 4331 | 3371 | 7 | 0 | 2.357650362 | 13.9013457  | 78.08377956 |
| 4332 | 3372 | 7 | 0 | 7.072951105 | 14.77017982 | 79.5004781  |
| 4333 | 3373 | 7 | 0 | 25.93414963 | 13.0325116  | 79.5004781  |
| 4334 | 3374 | 7 | 0 | 16.50355257 | 13.9013457  | 78.08377956 |
| 4335 | 3375 | 7 | 0 | 21.21885331 | 14.77017982 | 79.5004781  |
| 4336 | 3376 | 7 | 0 | 11.78825184 | 13.0325116  | 79.5004781  |

|      |      |   |   |             |             |             |
|------|------|---|---|-------------|-------------|-------------|
| 4337 | 3377 | 7 | 0 | 2.357650362 | 16.50784802 | 79.5004781  |
| 4338 | 3378 | 7 | 0 | 7.072951105 | 17.37668214 | 80.91717664 |
| 4339 | 3379 | 7 | 0 | 25.93414963 | 15.63901392 | 80.91717664 |
| 4340 | 3380 | 7 | 0 | 16.50355257 | 16.50784802 | 79.5004781  |
| 4341 | 3381 | 7 | 0 | 21.21885331 | 17.37668214 | 80.91717664 |
| 4342 | 3382 | 7 | 0 | 11.78825184 | 15.63901392 | 80.91717664 |
| 4343 | 3383 | 7 | 0 | 2.357650362 | 19.11435034 | 80.91717664 |
| 4344 | 3384 | 7 | 0 | 7.072951105 | 19.98318446 | 82.33387518 |
| 4345 | 3385 | 7 | 0 | 25.93414963 | 18.24551624 | 82.33387518 |
| 4346 | 3386 | 7 | 0 | 16.50355257 | 19.11435034 | 80.91717664 |
| 4347 | 3387 | 7 | 0 | 21.21885331 | 19.98318446 | 82.33387518 |
| 4348 | 3388 | 7 | 0 | 11.78825184 | 18.24551624 | 82.33387518 |
| 4349 | 3389 | 7 | 0 | 2.357650362 | 21.72085266 | 82.33387518 |
| 4350 | 3390 | 7 | 0 | 7.072951105 | 22.58968677 | 83.75057372 |
| 4351 | 3391 | 7 | 0 | 25.93414963 | 20.85201856 | 83.75057372 |
| 4352 | 3392 | 7 | 0 | 16.50355257 | 21.72085266 | 82.33387518 |
| 4353 | 3393 | 7 | 0 | 21.21885331 | 22.58968677 | 83.75057372 |
| 4354 | 3394 | 7 | 0 | 11.78825184 | 20.85201856 | 83.75057372 |
| 4355 | 3395 | 7 | 0 | 2.357650362 | 24.32735498 | 83.75057372 |
| 4356 | 3396 | 7 | 0 | 7.072951105 | 25.19618909 | 85.16727226 |
| 4357 | 3397 | 7 | 0 | 25.93414963 | 23.45852088 | 85.16727226 |
| 4358 | 3398 | 7 | 0 | 16.50355257 | 24.32735498 | 83.75057372 |
| 4359 | 3399 | 7 | 0 | 21.21885331 | 25.19618909 | 85.16727226 |
| 4360 | 3400 | 7 | 0 | 11.78825184 | 23.45852088 | 85.16727226 |
| 4361 | 3401 | 7 | 0 | 2.357650362 | 26.9338573  | 85.16727226 |
| 4362 | 3402 | 7 | 0 | 7.072951105 | 27.80269141 | 86.5839708  |
| 4363 | 3403 | 7 | 0 | 25.93414963 | 26.0650232  | 86.5839708  |
| 4364 | 3404 | 7 | 0 | 16.50355257 | 26.9338573  | 85.16727226 |
| 4365 | 3405 | 7 | 0 | 21.21885331 | 27.80269141 | 86.5839708  |
| 4366 | 3406 | 7 | 0 | 11.78825184 | 26.0650232  | 86.5839708  |
| 4367 | 3407 | 7 | 0 | 2.357650362 | 29.54035962 | 86.5839708  |
| 4368 | 3408 | 7 | 0 | 16.50355257 | 29.54035962 | 86.5839708  |
| 4369 | 3409 | 7 | 0 | 2.357650362 | 0.86883411  | 68.16688978 |
| 4370 | 3410 | 7 | 0 | 7.072951105 | 1.73766822  | 69.58358832 |
| 4371 | 3411 | 7 | 0 | 25.93414963 | 0           | 69.58358832 |
| 4372 | 3412 | 7 | 0 | 16.50355257 | 0.86883411  | 68.16688978 |
| 4373 | 3413 | 7 | 0 | 21.21885331 | 1.73766822  | 69.58358832 |
| 4374 | 3414 | 7 | 0 | 11.78825184 | 0           | 69.58358832 |
| 4375 | 3415 | 7 | 0 | 2.357650362 | 3.475336426 | 69.58358832 |
| 4376 | 3416 | 7 | 0 | 7.072951105 | 4.34417054  | 71.00028686 |
| 4377 | 3417 | 7 | 0 | 25.93414963 | 2.60650232  | 71.00028686 |
| 4378 | 3418 | 7 | 0 | 16.50355257 | 3.475336426 | 69.58358832 |
| 4379 | 3419 | 7 | 0 | 21.21885331 | 4.34417054  | 71.00028686 |
| 4380 | 3420 | 7 | 0 | 11.78825184 | 2.60650232  | 71.00028686 |
| 4381 | 3421 | 7 | 0 | 2.357650362 | 6.081838745 | 71.00028686 |
| 4382 | 3422 | 7 | 0 | 7.072951105 | 6.950672859 | 72.4169854  |
| 4383 | 3423 | 7 | 0 | 25.93414963 | 5.213004642 | 72.4169854  |
| 4384 | 3424 | 7 | 0 | 16.50355257 | 6.081838745 | 71.00028686 |
| 4385 | 3425 | 7 | 0 | 21.21885331 | 6.950672859 | 72.4169854  |
| 4386 | 3426 | 7 | 0 | 11.78825184 | 5.213004642 | 72.4169854  |
| 4387 | 3427 | 7 | 0 | 2.357650362 | 8.688341064 | 72.4169854  |

|      |      |   |   |             |             |             |
|------|------|---|---|-------------|-------------|-------------|
| 4388 | 3428 | 7 | 0 | 7.072951105 | 9.557175178 | 73.83368394 |
| 4389 | 3429 | 7 | 0 | 25.93414963 | 7.819506962 | 73.83368394 |
| 4390 | 3430 | 7 | 0 | 16.50355257 | 8.688341064 | 72.4169854  |
| 4391 | 3431 | 7 | 0 | 21.21885331 | 9.557175178 | 73.83368394 |
| 4392 | 3432 | 7 | 0 | 11.78825184 | 7.819506962 | 73.83368394 |
| 4393 | 3433 | 7 | 0 | 2.357650362 | 11.29484338 | 73.83368394 |
| 4394 | 3434 | 7 | 0 | 7.072951105 | 12.1636775  | 75.25038248 |
| 4395 | 3435 | 7 | 0 | 25.93414963 | 10.42600928 | 75.25038248 |
| 4396 | 3436 | 7 | 0 | 16.50355257 | 11.29484338 | 73.83368394 |
| 4397 | 3437 | 7 | 0 | 21.21885331 | 12.1636775  | 75.25038248 |
| 4398 | 3438 | 7 | 0 | 11.78825184 | 10.42600928 | 75.25038248 |
| 4399 | 3439 | 7 | 0 | 2.357650362 | 13.9013457  | 75.25038248 |
| 4400 | 3440 | 7 | 0 | 7.072951105 | 14.77017982 | 76.66708102 |
| 4401 | 3441 | 7 | 0 | 25.93414963 | 13.0325116  | 76.66708102 |
| 4402 | 3442 | 7 | 0 | 16.50355257 | 13.9013457  | 75.25038248 |
| 4403 | 3443 | 7 | 0 | 21.21885331 | 14.77017982 | 76.66708102 |
| 4404 | 3444 | 7 | 0 | 11.78825184 | 13.0325116  | 76.66708102 |
| 4405 | 3445 | 7 | 0 | 2.357650362 | 16.50784802 | 76.66708102 |
| 4406 | 3446 | 7 | 0 | 7.072951105 | 17.37668214 | 78.08377956 |
| 4407 | 3447 | 7 | 0 | 25.93414963 | 15.63901392 | 78.08377956 |
| 4408 | 3448 | 7 | 0 | 16.50355257 | 16.50784802 | 76.66708102 |
| 4409 | 3449 | 7 | 0 | 21.21885331 | 17.37668214 | 78.08377956 |
| 4410 | 3450 | 7 | 0 | 11.78825184 | 15.63901392 | 78.08377956 |
| 4411 | 3451 | 7 | 0 | 2.357650362 | 19.11435034 | 78.08377956 |
| 4412 | 3452 | 7 | 0 | 7.072951105 | 19.98318446 | 79.5004781  |
| 4413 | 3453 | 7 | 0 | 25.93414963 | 18.24551624 | 79.5004781  |
| 4414 | 3454 | 7 | 0 | 16.50355257 | 19.11435034 | 78.08377956 |
| 4415 | 3455 | 7 | 0 | 21.21885331 | 19.98318446 | 79.5004781  |
| 4416 | 3456 | 7 | 0 | 11.78825184 | 18.24551624 | 79.5004781  |
| 4417 | 3457 | 7 | 0 | 2.357650362 | 21.72085266 | 79.5004781  |
| 4418 | 3458 | 7 | 0 | 7.072951105 | 22.58968677 | 80.91717664 |
| 4419 | 3459 | 7 | 0 | 25.93414963 | 20.85201856 | 80.91717664 |
| 4420 | 3460 | 7 | 0 | 16.50355257 | 21.72085266 | 79.5004781  |
| 4421 | 3461 | 7 | 0 | 21.21885331 | 22.58968677 | 80.91717664 |
| 4422 | 3462 | 7 | 0 | 11.78825184 | 20.85201856 | 80.91717664 |
| 4423 | 3463 | 7 | 0 | 2.357650362 | 24.32735498 | 80.91717664 |
| 4424 | 3464 | 7 | 0 | 7.072951105 | 25.19618909 | 82.33387518 |
| 4425 | 3465 | 7 | 0 | 25.93414963 | 23.45852088 | 82.33387518 |
| 4426 | 3466 | 7 | 0 | 16.50355257 | 24.32735498 | 80.91717664 |
| 4427 | 3467 | 7 | 0 | 21.21885331 | 25.19618909 | 82.33387518 |
| 4428 | 3468 | 7 | 0 | 11.78825184 | 23.45852088 | 82.33387518 |
| 4429 | 3469 | 7 | 0 | 2.357650362 | 26.9338573  | 82.33387518 |
| 4430 | 3470 | 7 | 0 | 7.072951105 | 27.80269141 | 83.75057372 |
| 4431 | 3471 | 7 | 0 | 25.93414963 | 26.0650232  | 83.75057372 |
| 4432 | 3472 | 7 | 0 | 16.50355257 | 26.9338573  | 82.33387518 |
| 4433 | 3473 | 7 | 0 | 21.21885331 | 27.80269141 | 83.75057372 |
| 4434 | 3474 | 7 | 0 | 11.78825184 | 26.0650232  | 83.75057372 |
| 4435 | 3475 | 7 | 0 | 2.357650362 | 29.54035962 | 83.75057372 |
| 4436 | 3476 | 7 | 0 | 7.072951105 | 30.40919373 | 85.16727226 |
| 4437 | 3477 | 7 | 0 | 25.93414963 | 28.67152552 | 85.16727226 |
| 4438 | 3478 | 7 | 0 | 16.50355257 | 29.54035962 | 83.75057372 |



|      |      |   |   |             |             |             |
|------|------|---|---|-------------|-------------|-------------|
| 4439 | 3479 | 7 | 0 | 21.21885331 | 30.40919373 | 85.16727226 |
| 4440 | 3480 | 7 | 0 | 11.78825184 | 28.67152552 | 85.16727226 |
| 4441 | 3481 | 7 | 0 | 2.357650362 | 0.86883411  | 65.3334927  |
| 4442 | 3482 | 7 | 0 | 7.072951105 | 1.73766822  | 66.75019124 |
| 4443 | 3483 | 7 | 0 | 25.93414963 | 0           | 66.75019124 |
| 4444 | 3484 | 7 | 0 | 16.50355257 | 0.86883411  | 65.3334927  |
| 4445 | 3485 | 7 | 0 | 21.21885331 | 1.73766822  | 66.75019124 |
| 4446 | 3486 | 7 | 0 | 11.78825184 | 0           | 66.75019124 |
| 4447 | 3487 | 7 | 0 | 2.357650362 | 3.475336426 | 66.75019124 |
| 4448 | 3488 | 7 | 0 | 7.072951105 | 4.34417054  | 68.16688978 |
| 4449 | 3489 | 7 | 0 | 25.93414963 | 2.60650232  | 68.16688978 |
| 4450 | 3490 | 7 | 0 | 16.50355257 | 3.475336426 | 66.75019124 |
| 4451 | 3491 | 7 | 0 | 21.21885331 | 4.34417054  | 68.16688978 |
| 4452 | 3492 | 7 | 0 | 11.78825184 | 2.60650232  | 68.16688978 |
| 4453 | 3493 | 7 | 0 | 2.357650362 | 6.081838745 | 68.16688978 |
| 4454 | 3494 | 7 | 0 | 7.072951105 | 6.950672859 | 69.58358832 |
| 4455 | 3495 | 7 | 0 | 25.93414963 | 5.213004642 | 69.58358832 |
| 4456 | 3496 | 7 | 0 | 16.50355257 | 6.081838745 | 68.16688978 |
| 4457 | 3497 | 7 | 0 | 21.21885331 | 6.950672859 | 69.58358832 |
| 4458 | 3498 | 7 | 0 | 11.78825184 | 5.213004642 | 69.58358832 |
| 4459 | 3499 | 7 | 0 | 2.357650362 | 8.688341064 | 69.58358832 |
| 4460 | 3500 | 7 | 0 | 7.072951105 | 9.557175178 | 71.00028686 |
| 4461 | 3501 | 7 | 0 | 25.93414963 | 7.819506962 | 71.00028686 |
| 4462 | 3502 | 7 | 0 | 16.50355257 | 8.688341064 | 69.58358832 |
| 4463 | 3503 | 7 | 0 | 21.21885331 | 9.557175178 | 71.00028686 |
| 4464 | 3504 | 7 | 0 | 11.78825184 | 7.819506962 | 71.00028686 |
| 4465 | 3505 | 7 | 0 | 2.357650362 | 11.29484338 | 71.00028686 |
| 4466 | 3506 | 7 | 0 | 7.072951105 | 12.1636775  | 72.4169854  |
| 4467 | 3507 | 7 | 0 | 25.93414963 | 10.42600928 | 72.4169854  |
| 4468 | 3508 | 7 | 0 | 16.50355257 | 11.29484338 | 71.00028686 |
| 4469 | 3509 | 7 | 0 | 21.21885331 | 12.1636775  | 72.4169854  |
| 4470 | 3510 | 7 | 0 | 11.78825184 | 10.42600928 | 72.4169854  |
| 4471 | 3511 | 7 | 0 | 2.357650362 | 13.9013457  | 72.4169854  |
| 4472 | 3512 | 7 | 0 | 7.072951105 | 14.77017982 | 73.83368394 |
| 4473 | 3513 | 7 | 0 | 25.93414963 | 13.0325116  | 73.83368394 |
| 4474 | 3514 | 7 | 0 | 16.50355257 | 13.9013457  | 72.4169854  |
| 4475 | 3515 | 7 | 0 | 21.21885331 | 14.77017982 | 73.83368394 |
| 4476 | 3516 | 7 | 0 | 11.78825184 | 13.0325116  | 73.83368394 |
| 4477 | 3517 | 7 | 0 | 2.357650362 | 16.50784802 | 73.83368394 |
| 4478 | 3518 | 7 | 0 | 7.072951105 | 17.37668214 | 75.25038248 |
| 4479 | 3519 | 7 | 0 | 25.93414963 | 15.63901392 | 75.25038248 |
| 4480 | 3520 | 7 | 0 | 16.50355257 | 16.50784802 | 73.83368394 |
| 4481 | 3521 | 7 | 0 | 21.21885331 | 17.37668214 | 75.25038248 |
| 4482 | 3522 | 7 | 0 | 11.78825184 | 15.63901392 | 75.25038248 |
| 4483 | 3523 | 7 | 0 | 2.357650362 | 19.11435034 | 75.25038248 |
| 4484 | 3524 | 7 | 0 | 7.072951105 | 19.98318446 | 76.66708102 |
| 4485 | 3525 | 7 | 0 | 25.93414963 | 18.24551624 | 76.66708102 |
| 4486 | 3526 | 7 | 0 | 16.50355257 | 19.11435034 | 75.25038248 |
| 4487 | 3527 | 7 | 0 | 21.21885331 | 19.98318446 | 76.66708102 |
| 4488 | 3528 | 7 | 0 | 11.78825184 | 18.24551624 | 76.66708102 |
| 4489 | 3529 | 7 | 0 | 2.357650362 | 21.72085266 | 76.66708102 |

|      |      |   |   |             |             |             |
|------|------|---|---|-------------|-------------|-------------|
| 4490 | 3530 | 7 | 0 | 7.072951105 | 22.58968677 | 78.08377956 |
| 4491 | 3531 | 7 | 0 | 25.93414963 | 20.85201856 | 78.08377956 |
| 4492 | 3532 | 7 | 0 | 16.50355257 | 21.72085266 | 76.66708102 |
| 4493 | 3533 | 7 | 0 | 21.21885331 | 22.58968677 | 78.08377956 |
| 4494 | 3534 | 7 | 0 | 11.78825184 | 20.85201856 | 78.08377956 |
| 4495 | 3535 | 7 | 0 | 2.357650362 | 24.32735498 | 78.08377956 |
| 4496 | 3536 | 7 | 0 | 7.072951105 | 25.19618909 | 79.5004781  |
| 4497 | 3537 | 7 | 0 | 25.93414963 | 23.45852088 | 79.5004781  |
| 4498 | 3538 | 7 | 0 | 16.50355257 | 24.32735498 | 78.08377956 |
| 4499 | 3539 | 7 | 0 | 21.21885331 | 25.19618909 | 79.5004781  |
| 4500 | 3540 | 7 | 0 | 11.78825184 | 23.45852088 | 79.5004781  |
| 4501 | 3541 | 7 | 0 | 2.357650362 | 26.9338573  | 79.5004781  |
| 4502 | 3542 | 7 | 0 | 7.072951105 | 27.80269141 | 80.91717664 |
| 4503 | 3543 | 7 | 0 | 25.93414963 | 26.0650232  | 80.91717664 |
| 4504 | 3544 | 7 | 0 | 16.50355257 | 26.9338573  | 79.5004781  |
| 4505 | 3545 | 7 | 0 | 21.21885331 | 27.80269141 | 80.91717664 |
| 4506 | 3546 | 7 | 0 | 11.78825184 | 26.0650232  | 80.91717664 |
| 4507 | 3547 | 7 | 0 | 2.357650362 | 29.54035962 | 80.91717664 |
| 4508 | 3548 | 7 | 0 | 7.072951105 | 30.40919373 | 82.33387518 |
| 4509 | 3549 | 7 | 0 | 25.93414963 | 28.67152552 | 82.33387518 |
| 4510 | 3550 | 7 | 0 | 16.50355257 | 29.54035962 | 80.91717664 |
| 4511 | 3551 | 7 | 0 | 21.21885331 | 30.40919373 | 82.33387518 |
| 4512 | 3552 | 7 | 0 | 11.78825184 | 28.67152552 | 82.33387518 |
| 4513 | 3553 | 7 | 0 | 2.357650362 | 0.86883411  | 62.50009562 |
| 4514 | 3554 | 7 | 0 | 7.072951105 | 1.73766822  | 63.91679416 |
| 4515 | 3555 | 7 | 0 | 25.93414963 | 0           | 63.91679416 |
| 4516 | 3556 | 7 | 0 | 16.50355257 | 0.86883411  | 62.50009562 |
| 4517 | 3557 | 7 | 0 | 21.21885331 | 1.73766822  | 63.91679416 |
| 4518 | 3558 | 7 | 0 | 11.78825184 | 0           | 63.91679416 |
| 4519 | 3559 | 7 | 0 | 2.357650362 | 3.475336426 | 63.91679416 |
| 4520 | 3560 | 7 | 0 | 7.072951105 | 4.34417054  | 65.3334927  |
| 4521 | 3561 | 7 | 0 | 25.93414963 | 2.60650232  | 65.3334927  |
| 4522 | 3562 | 7 | 0 | 16.50355257 | 3.475336426 | 63.91679416 |
| 4523 | 3563 | 7 | 0 | 21.21885331 | 4.34417054  | 65.3334927  |
| 4524 | 3564 | 7 | 0 | 11.78825184 | 2.60650232  | 65.3334927  |
| 4525 | 3565 | 7 | 0 | 2.357650362 | 6.081838745 | 65.3334927  |
| 4526 | 3566 | 7 | 0 | 7.072951105 | 6.950672859 | 66.75019124 |
| 4527 | 3567 | 7 | 0 | 25.93414963 | 5.213004642 | 66.75019124 |
| 4528 | 3568 | 7 | 0 | 16.50355257 | 6.081838745 | 65.3334927  |
| 4529 | 3569 | 7 | 0 | 21.21885331 | 6.950672859 | 66.75019124 |
| 4530 | 3570 | 7 | 0 | 11.78825184 | 5.213004642 | 66.75019124 |
| 4531 | 3571 | 7 | 0 | 2.357650362 | 8.688341064 | 66.75019124 |
| 4532 | 3572 | 7 | 0 | 7.072951105 | 9.557175178 | 68.16688978 |
| 4533 | 3573 | 7 | 0 | 25.93414963 | 7.819506962 | 68.16688978 |
| 4534 | 3574 | 7 | 0 | 16.50355257 | 8.688341064 | 66.75019124 |
| 4535 | 3575 | 7 | 0 | 21.21885331 | 9.557175178 | 68.16688978 |
| 4536 | 3576 | 7 | 0 | 11.78825184 | 7.819506962 | 68.16688978 |
| 4537 | 3577 | 7 | 0 | 2.357650362 | 11.29484338 | 68.16688978 |
| 4538 | 3578 | 7 | 0 | 7.072951105 | 12.1636775  | 69.58358832 |
| 4539 | 3579 | 7 | 0 | 25.93414963 | 10.42600928 | 69.58358832 |
| 4540 | 3580 | 7 | 0 | 16.50355257 | 11.29484338 | 68.16688978 |

|      |      |   |   |             |             |             |
|------|------|---|---|-------------|-------------|-------------|
| 4541 | 3581 | 7 | 0 | 21.21885331 | 12.1636775  | 69.58358832 |
| 4542 | 3582 | 7 | 0 | 11.78825184 | 10.42600928 | 69.58358832 |
| 4543 | 3583 | 7 | 0 | 2.357650362 | 13.9013457  | 69.58358832 |
| 4544 | 3584 | 7 | 0 | 7.072951105 | 14.77017982 | 71.00028686 |
| 4545 | 3585 | 7 | 0 | 25.93414963 | 13.0325116  | 71.00028686 |
| 4546 | 3586 | 7 | 0 | 16.50355257 | 13.9013457  | 69.58358832 |
| 4547 | 3587 | 7 | 0 | 21.21885331 | 14.77017982 | 71.00028686 |
| 4548 | 3588 | 7 | 0 | 11.78825184 | 13.0325116  | 71.00028686 |
| 4549 | 3589 | 7 | 0 | 2.357650362 | 16.50784802 | 71.00028686 |
| 4550 | 3590 | 7 | 0 | 7.072951105 | 17.37668214 | 72.4169854  |
| 4551 | 3591 | 7 | 0 | 25.93414963 | 15.63901392 | 72.4169854  |
| 4552 | 3592 | 7 | 0 | 16.50355257 | 16.50784802 | 71.00028686 |
| 4553 | 3593 | 7 | 0 | 21.21885331 | 17.37668214 | 72.4169854  |
| 4554 | 3594 | 7 | 0 | 11.78825184 | 15.63901392 | 72.4169854  |
| 4555 | 3595 | 7 | 0 | 2.357650362 | 19.11435034 | 72.4169854  |
| 4556 | 3596 | 7 | 0 | 7.072951105 | 19.98318446 | 73.83368394 |
| 4557 | 3597 | 7 | 0 | 25.93414963 | 18.24551624 | 73.83368394 |
| 4558 | 3598 | 7 | 0 | 16.50355257 | 19.11435034 | 72.4169854  |
| 4559 | 3599 | 7 | 0 | 21.21885331 | 19.98318446 | 73.83368394 |
| 4560 | 3600 | 7 | 0 | 11.78825184 | 18.24551624 | 73.83368394 |
| 4561 | 3601 | 7 | 0 | 2.357650362 | 21.72085266 | 73.83368394 |
| 4562 | 3602 | 7 | 0 | 7.072951105 | 22.58968677 | 75.25038248 |
| 4563 | 3603 | 7 | 0 | 25.93414963 | 20.85201856 | 75.25038248 |
| 4564 | 3604 | 7 | 0 | 16.50355257 | 21.72085266 | 73.83368394 |
| 4565 | 3605 | 7 | 0 | 21.21885331 | 22.58968677 | 75.25038248 |
| 4566 | 3606 | 7 | 0 | 11.78825184 | 20.85201856 | 75.25038248 |
| 4567 | 3607 | 7 | 0 | 2.357650362 | 24.32735498 | 75.25038248 |
| 4568 | 3608 | 7 | 0 | 7.072951105 | 25.19618909 | 76.66708102 |
| 4569 | 3609 | 7 | 0 | 25.93414963 | 23.45852088 | 76.66708102 |
| 4570 | 3610 | 7 | 0 | 16.50355257 | 24.32735498 | 75.25038248 |
| 4571 | 3611 | 7 | 0 | 21.21885331 | 25.19618909 | 76.66708102 |
| 4572 | 3612 | 7 | 0 | 11.78825184 | 23.45852088 | 76.66708102 |
| 4573 | 3613 | 7 | 0 | 2.357650362 | 26.9338573  | 76.66708102 |
| 4574 | 3614 | 7 | 0 | 7.072951105 | 27.80269141 | 78.08377956 |
| 4575 | 3615 | 7 | 0 | 25.93414963 | 26.0650232  | 78.08377956 |
| 4576 | 3616 | 7 | 0 | 16.50355257 | 26.9338573  | 76.66708102 |
| 4577 | 3617 | 7 | 0 | 21.21885331 | 27.80269141 | 78.08377956 |
| 4578 | 3618 | 7 | 0 | 11.78825184 | 26.0650232  | 78.08377956 |
| 4579 | 3619 | 7 | 0 | 2.357650362 | 29.54035962 | 78.08377956 |
| 4580 | 3620 | 7 | 0 | 7.072951105 | 30.40919373 | 79.5004781  |
| 4581 | 3621 | 7 | 0 | 25.93414963 | 28.67152552 | 79.5004781  |
| 4582 | 3622 | 7 | 0 | 16.50355257 | 29.54035962 | 78.08377956 |
| 4583 | 3623 | 7 | 0 | 21.21885331 | 30.40919373 | 79.5004781  |
| 4584 | 3624 | 7 | 0 | 11.78825184 | 28.67152552 | 79.5004781  |
| 4585 | 3625 | 7 | 0 | 2.357650362 | 0.86883411  | 59.66669854 |
| 4586 | 3626 | 7 | 0 | 7.072951105 | 1.73766822  | 61.08339708 |
| 4587 | 3627 | 7 | 0 | 25.93414963 | 0           | 61.08339708 |
| 4588 | 3628 | 7 | 0 | 16.50355257 | 0.86883411  | 59.66669854 |
| 4589 | 3629 | 7 | 0 | 21.21885331 | 1.73766822  | 61.08339708 |
| 4590 | 3630 | 7 | 0 | 11.78825184 | 0           | 61.08339708 |
| 4591 | 3631 | 7 | 0 | 2.357650362 | 3.475336426 | 61.08339708 |

|      |      |   |   |             |             |             |
|------|------|---|---|-------------|-------------|-------------|
| 4592 | 3632 | 7 | 0 | 7.072951105 | 4.34417054  | 62.50009562 |
| 4593 | 3633 | 7 | 0 | 25.93414963 | 2.60650232  | 62.50009562 |
| 4594 | 3634 | 7 | 0 | 16.50355257 | 3.475336426 | 61.08339708 |
| 4595 | 3635 | 7 | 0 | 21.21885331 | 4.34417054  | 62.50009562 |
| 4596 | 3636 | 7 | 0 | 11.78825184 | 2.60650232  | 62.50009562 |
| 4597 | 3637 | 7 | 0 | 2.357650362 | 6.081838745 | 62.50009562 |
| 4598 | 3638 | 7 | 0 | 7.072951105 | 6.950672859 | 63.91679416 |
| 4599 | 3639 | 7 | 0 | 25.93414963 | 5.213004642 | 63.91679416 |
| 4600 | 3640 | 7 | 0 | 16.50355257 | 6.081838745 | 62.50009562 |
| 4601 | 3641 | 7 | 0 | 21.21885331 | 6.950672859 | 63.91679416 |
| 4602 | 3642 | 7 | 0 | 11.78825184 | 5.213004642 | 63.91679416 |
| 4603 | 3643 | 7 | 0 | 2.357650362 | 8.688341064 | 63.91679416 |
| 4604 | 3644 | 7 | 0 | 7.072951105 | 9.557175178 | 65.3334927  |
| 4605 | 3645 | 7 | 0 | 25.93414963 | 7.819506962 | 65.3334927  |
| 4606 | 3646 | 7 | 0 | 16.50355257 | 8.688341064 | 63.91679416 |
| 4607 | 3647 | 7 | 0 | 21.21885331 | 9.557175178 | 65.3334927  |
| 4608 | 3648 | 7 | 0 | 11.78825184 | 7.819506962 | 65.3334927  |
| 4609 | 3649 | 7 | 0 | 2.357650362 | 11.29484338 | 65.3334927  |
| 4610 | 3650 | 7 | 0 | 7.072951105 | 12.1636775  | 66.75019124 |
| 4611 | 3651 | 7 | 0 | 25.93414963 | 10.42600928 | 66.75019124 |
| 4612 | 3652 | 7 | 0 | 16.50355257 | 11.29484338 | 65.3334927  |
| 4613 | 3653 | 7 | 0 | 21.21885331 | 12.1636775  | 66.75019124 |
| 4614 | 3654 | 7 | 0 | 11.78825184 | 10.42600928 | 66.75019124 |
| 4615 | 3655 | 7 | 0 | 2.357650362 | 13.9013457  | 66.75019124 |
| 4616 | 3656 | 7 | 0 | 7.072951105 | 14.77017982 | 68.16688978 |
| 4617 | 3657 | 7 | 0 | 25.93414963 | 13.0325116  | 68.16688978 |
| 4618 | 3658 | 7 | 0 | 16.50355257 | 13.9013457  | 66.75019124 |
| 4619 | 3659 | 7 | 0 | 21.21885331 | 14.77017982 | 68.16688978 |
| 4620 | 3660 | 7 | 0 | 11.78825184 | 13.0325116  | 68.16688978 |
| 4621 | 3661 | 7 | 0 | 2.357650362 | 16.50784802 | 68.16688978 |
| 4622 | 3662 | 7 | 0 | 7.072951105 | 17.37668214 | 69.58358832 |
| 4623 | 3663 | 7 | 0 | 25.93414963 | 15.63901392 | 69.58358832 |
| 4624 | 3664 | 7 | 0 | 16.50355257 | 16.50784802 | 68.16688978 |
| 4625 | 3665 | 7 | 0 | 21.21885331 | 17.37668214 | 69.58358832 |
| 4626 | 3666 | 7 | 0 | 11.78825184 | 15.63901392 | 69.58358832 |
| 4627 | 3667 | 7 | 0 | 2.357650362 | 19.11435034 | 69.58358832 |
| 4628 | 3668 | 7 | 0 | 7.072951105 | 19.98318446 | 71.00028686 |
| 4629 | 3669 | 7 | 0 | 25.93414963 | 18.24551624 | 71.00028686 |
| 4630 | 3670 | 7 | 0 | 16.50355257 | 19.11435034 | 69.58358832 |
| 4631 | 3671 | 7 | 0 | 21.21885331 | 19.98318446 | 71.00028686 |
| 4632 | 3672 | 7 | 0 | 11.78825184 | 18.24551624 | 71.00028686 |
| 4633 | 3673 | 7 | 0 | 2.357650362 | 21.72085266 | 71.00028686 |
| 4634 | 3674 | 7 | 0 | 7.072951105 | 22.58968677 | 72.4169854  |
| 4635 | 3675 | 7 | 0 | 25.93414963 | 20.85201856 | 72.4169854  |
| 4636 | 3676 | 7 | 0 | 16.50355257 | 21.72085266 | 71.00028686 |
| 4637 | 3677 | 7 | 0 | 21.21885331 | 22.58968677 | 72.4169854  |
| 4638 | 3678 | 7 | 0 | 11.78825184 | 20.85201856 | 72.4169854  |
| 4639 | 3679 | 7 | 0 | 2.357650362 | 24.32735498 | 72.4169854  |
| 4640 | 3680 | 7 | 0 | 7.072951105 | 25.19618909 | 73.83368394 |
| 4641 | 3681 | 7 | 0 | 25.93414963 | 23.45852088 | 73.83368394 |
| 4642 | 3682 | 7 | 0 | 16.50355257 | 24.32735498 | 72.4169854  |

|      |      |   |   |             |             |             |
|------|------|---|---|-------------|-------------|-------------|
| 4643 | 3683 | 7 | 0 | 21.21885331 | 25.19618909 | 73.83368394 |
| 4644 | 3684 | 7 | 0 | 11.78825184 | 23.45852088 | 73.83368394 |
| 4645 | 3685 | 7 | 0 | 2.357650362 | 26.9338573  | 73.83368394 |
| 4646 | 3686 | 7 | 0 | 7.072951105 | 27.80269141 | 75.25038248 |
| 4647 | 3687 | 7 | 0 | 25.93414963 | 26.0650232  | 75.25038248 |
| 4648 | 3688 | 7 | 0 | 16.50355257 | 26.9338573  | 73.83368394 |
| 4649 | 3689 | 7 | 0 | 21.21885331 | 27.80269141 | 75.25038248 |
| 4650 | 3690 | 7 | 0 | 11.78825184 | 26.0650232  | 75.25038248 |
| 4651 | 3691 | 7 | 0 | 2.357650362 | 29.54035962 | 75.25038248 |
| 4652 | 3692 | 7 | 0 | 7.072951105 | 30.40919373 | 76.66708102 |
| 4653 | 3693 | 7 | 0 | 25.93414963 | 28.67152552 | 76.66708102 |
| 4654 | 3694 | 7 | 0 | 16.50355257 | 29.54035962 | 75.25038248 |
| 4655 | 3695 | 7 | 0 | 21.21885331 | 30.40919373 | 76.66708102 |
| 4656 | 3696 | 7 | 0 | 11.78825184 | 28.67152552 | 76.66708102 |
| 4657 | 3697 | 7 | 0 | 7.072951105 | 1.73766822  | 58.25       |
| 4658 | 3698 | 7 | 0 | 25.93414963 | 0 58.25     |             |
| 4659 | 3699 | 7 | 0 | 21.21885331 | 1.73766822  | 58.25       |
| 4660 | 3700 | 7 | 0 | 11.78825184 | 0 58.25     |             |
| 4661 | 3701 | 7 | 0 | 2.357650362 | 3.475336426 | 58.25       |
| 4662 | 3702 | 7 | 0 | 7.072951105 | 4.34417054  | 59.66669854 |
| 4663 | 3703 | 7 | 0 | 25.93414963 | 2.60650232  | 59.66669854 |
| 4664 | 3704 | 7 | 0 | 16.50355257 | 3.475336426 | 58.25       |
| 4665 | 3705 | 7 | 0 | 21.21885331 | 4.34417054  | 59.66669854 |
| 4666 | 3706 | 7 | 0 | 11.78825184 | 2.60650232  | 59.66669854 |
| 4667 | 3707 | 7 | 0 | 2.357650362 | 6.081838745 | 59.66669854 |
| 4668 | 3708 | 7 | 0 | 7.072951105 | 6.950672859 | 61.08339708 |
| 4669 | 3709 | 7 | 0 | 25.93414963 | 5.213004642 | 61.08339708 |
| 4670 | 3710 | 7 | 0 | 16.50355257 | 6.081838745 | 59.66669854 |
| 4671 | 3711 | 7 | 0 | 21.21885331 | 6.950672859 | 61.08339708 |
| 4672 | 3712 | 7 | 0 | 11.78825184 | 5.213004642 | 61.08339708 |
| 4673 | 3713 | 7 | 0 | 2.357650362 | 8.688341064 | 61.08339708 |
| 4674 | 3714 | 7 | 0 | 7.072951105 | 9.557175178 | 62.50009562 |
| 4675 | 3715 | 7 | 0 | 25.93414963 | 7.819506962 | 62.50009562 |
| 4676 | 3716 | 7 | 0 | 16.50355257 | 8.688341064 | 61.08339708 |
| 4677 | 3717 | 7 | 0 | 21.21885331 | 9.557175178 | 62.50009562 |
| 4678 | 3718 | 7 | 0 | 11.78825184 | 7.819506962 | 62.50009562 |
| 4679 | 3719 | 7 | 0 | 2.357650362 | 11.29484338 | 62.50009562 |
| 4680 | 3720 | 7 | 0 | 7.072951105 | 12.1636775  | 63.91679416 |
| 4681 | 3721 | 7 | 0 | 25.93414963 | 10.42600928 | 63.91679416 |
| 4682 | 3722 | 7 | 0 | 16.50355257 | 11.29484338 | 62.50009562 |
| 4683 | 3723 | 7 | 0 | 21.21885331 | 12.1636775  | 63.91679416 |
| 4684 | 3724 | 7 | 0 | 11.78825184 | 10.42600928 | 63.91679416 |
| 4685 | 3725 | 7 | 0 | 2.357650362 | 13.9013457  | 63.91679416 |
| 4686 | 3726 | 7 | 0 | 7.072951105 | 14.77017982 | 65.3334927  |
| 4687 | 3727 | 7 | 0 | 25.93414963 | 13.0325116  | 65.3334927  |
| 4688 | 3728 | 7 | 0 | 16.50355257 | 13.9013457  | 63.91679416 |
| 4689 | 3729 | 7 | 0 | 21.21885331 | 14.77017982 | 65.3334927  |
| 4690 | 3730 | 7 | 0 | 11.78825184 | 13.0325116  | 65.3334927  |
| 4691 | 3731 | 7 | 0 | 2.357650362 | 16.50784802 | 65.3334927  |
| 4692 | 3732 | 7 | 0 | 7.072951105 | 17.37668214 | 66.75019124 |
| 4693 | 3733 | 7 | 0 | 25.93414963 | 15.63901392 | 66.75019124 |

|      |      |   |   |             |             |             |
|------|------|---|---|-------------|-------------|-------------|
| 4694 | 3734 | 7 | 0 | 16.50355257 | 16.50784802 | 65.3334927  |
| 4695 | 3735 | 7 | 0 | 21.21885331 | 17.37668214 | 66.75019124 |
| 4696 | 3736 | 7 | 0 | 11.78825184 | 15.63901392 | 66.75019124 |
| 4697 | 3737 | 7 | 0 | 2.357650362 | 19.11435034 | 66.75019124 |
| 4698 | 3738 | 7 | 0 | 7.072951105 | 19.98318446 | 68.16688978 |
| 4699 | 3739 | 7 | 0 | 25.93414963 | 18.24551624 | 68.16688978 |
| 4700 | 3740 | 7 | 0 | 16.50355257 | 19.11435034 | 66.75019124 |
| 4701 | 3741 | 7 | 0 | 21.21885331 | 19.98318446 | 68.16688978 |
| 4702 | 3742 | 7 | 0 | 11.78825184 | 18.24551624 | 68.16688978 |
| 4703 | 3743 | 7 | 0 | 2.357650362 | 21.72085266 | 68.16688978 |
| 4704 | 3744 | 7 | 0 | 7.072951105 | 22.58968677 | 69.58358832 |
| 4705 | 3745 | 7 | 0 | 25.93414963 | 20.85201856 | 69.58358832 |
| 4706 | 3746 | 7 | 0 | 16.50355257 | 21.72085266 | 68.16688978 |
| 4707 | 3747 | 7 | 0 | 21.21885331 | 22.58968677 | 69.58358832 |
| 4708 | 3748 | 7 | 0 | 11.78825184 | 20.85201856 | 69.58358832 |
| 4709 | 3749 | 7 | 0 | 2.357650362 | 24.32735498 | 69.58358832 |
| 4710 | 3750 | 7 | 0 | 7.072951105 | 25.19618909 | 71.00028686 |
| 4711 | 3751 | 7 | 0 | 25.93414963 | 23.45852088 | 71.00028686 |
| 4712 | 3752 | 7 | 0 | 16.50355257 | 24.32735498 | 69.58358832 |
| 4713 | 3753 | 7 | 0 | 21.21885331 | 25.19618909 | 71.00028686 |
| 4714 | 3754 | 7 | 0 | 11.78825184 | 23.45852088 | 71.00028686 |
| 4715 | 3755 | 7 | 0 | 2.357650362 | 26.9338573  | 71.00028686 |
| 4716 | 3756 | 7 | 0 | 7.072951105 | 27.80269141 | 72.4169854  |
| 4717 | 3757 | 7 | 0 | 25.93414963 | 26.0650232  | 72.4169854  |
| 4718 | 3758 | 7 | 0 | 16.50355257 | 26.9338573  | 71.00028686 |
| 4719 | 3759 | 7 | 0 | 21.21885331 | 27.80269141 | 72.4169854  |
| 4720 | 3760 | 7 | 0 | 11.78825184 | 26.0650232  | 72.4169854  |
| 4721 | 3761 | 7 | 0 | 2.357650362 | 29.54035962 | 72.4169854  |
| 4722 | 3762 | 7 | 0 | 7.072951105 | 30.40919373 | 73.83368394 |
| 4723 | 3763 | 7 | 0 | 25.93414963 | 28.67152552 | 73.83368394 |
| 4724 | 3764 | 7 | 0 | 16.50355257 | 29.54035962 | 72.4169854  |
| 4725 | 3765 | 7 | 0 | 21.21885331 | 30.40919373 | 73.83368394 |
| 4726 | 3766 | 7 | 0 | 11.78825184 | 28.67152552 | 73.83368394 |
| 4727 | 3767 | 7 | 0 | 7.072951105 | 6.950672859 | 58.25       |
| 4728 | 3768 | 7 | 0 | 25.93414963 | 5.213004642 | 58.25       |
| 4729 | 3769 | 7 | 0 | 21.21885331 | 6.950672859 | 58.25       |
| 4730 | 3770 | 7 | 0 | 11.78825184 | 5.213004642 | 58.25       |
| 4731 | 3771 | 7 | 0 | 2.357650362 | 8.688341064 | 58.25       |
| 4732 | 3772 | 7 | 0 | 7.072951105 | 9.557175178 | 59.66669854 |
| 4733 | 3773 | 7 | 0 | 25.93414963 | 7.819506962 | 59.66669854 |
| 4734 | 3774 | 7 | 0 | 16.50355257 | 8.688341064 | 58.25       |
| 4735 | 3775 | 7 | 0 | 21.21885331 | 9.557175178 | 59.66669854 |
| 4736 | 3776 | 7 | 0 | 11.78825184 | 7.819506962 | 59.66669854 |
| 4737 | 3777 | 7 | 0 | 2.357650362 | 11.29484338 | 59.66669854 |
| 4738 | 3778 | 7 | 0 | 7.072951105 | 12.1636775  | 61.08339708 |
| 4739 | 3779 | 7 | 0 | 25.93414963 | 10.42600928 | 61.08339708 |
| 4740 | 3780 | 7 | 0 | 16.50355257 | 11.29484338 | 59.66669854 |
| 4741 | 3781 | 7 | 0 | 21.21885331 | 12.1636775  | 61.08339708 |
| 4742 | 3782 | 7 | 0 | 11.78825184 | 10.42600928 | 61.08339708 |
| 4743 | 3783 | 7 | 0 | 2.357650362 | 13.9013457  | 61.08339708 |
| 4744 | 3784 | 7 | 0 | 7.072951105 | 14.77017982 | 62.50009562 |

|      |      |   |   |             |             |             |
|------|------|---|---|-------------|-------------|-------------|
| 4745 | 3785 | 7 | 0 | 25.93414963 | 13.0325116  | 62.50009562 |
| 4746 | 3786 | 7 | 0 | 16.50355257 | 13.9013457  | 61.08339708 |
| 4747 | 3787 | 7 | 0 | 21.21885331 | 14.77017982 | 62.50009562 |
| 4748 | 3788 | 7 | 0 | 11.78825184 | 13.0325116  | 62.50009562 |
| 4749 | 3789 | 7 | 0 | 2.357650362 | 16.50784802 | 62.50009562 |
| 4750 | 3790 | 7 | 0 | 7.072951105 | 17.37668214 | 63.91679416 |
| 4751 | 3791 | 7 | 0 | 25.93414963 | 15.63901392 | 63.91679416 |
| 4752 | 3792 | 7 | 0 | 16.50355257 | 16.50784802 | 62.50009562 |
| 4753 | 3793 | 7 | 0 | 21.21885331 | 17.37668214 | 63.91679416 |
| 4754 | 3794 | 7 | 0 | 11.78825184 | 15.63901392 | 63.91679416 |
| 4755 | 3795 | 7 | 0 | 2.357650362 | 19.11435034 | 63.91679416 |
| 4756 | 3796 | 7 | 0 | 7.072951105 | 19.98318446 | 65.3334927  |
| 4757 | 3797 | 7 | 0 | 25.93414963 | 18.24551624 | 65.3334927  |
| 4758 | 3798 | 7 | 0 | 16.50355257 | 19.11435034 | 63.91679416 |
| 4759 | 3799 | 7 | 0 | 21.21885331 | 19.98318446 | 65.3334927  |
| 4760 | 3800 | 7 | 0 | 11.78825184 | 18.24551624 | 65.3334927  |
| 4761 | 3801 | 7 | 0 | 2.357650362 | 21.72085266 | 65.3334927  |
| 4762 | 3802 | 7 | 0 | 7.072951105 | 22.58968677 | 66.75019124 |
| 4763 | 3803 | 7 | 0 | 25.93414963 | 20.85201856 | 66.75019124 |
| 4764 | 3804 | 7 | 0 | 16.50355257 | 21.72085266 | 65.3334927  |
| 4765 | 3805 | 7 | 0 | 21.21885331 | 22.58968677 | 66.75019124 |
| 4766 | 3806 | 7 | 0 | 11.78825184 | 20.85201856 | 66.75019124 |
| 4767 | 3807 | 7 | 0 | 2.357650362 | 24.32735498 | 66.75019124 |
| 4768 | 3808 | 7 | 0 | 7.072951105 | 25.19618909 | 68.16688978 |
| 4769 | 3809 | 7 | 0 | 25.93414963 | 23.45852088 | 68.16688978 |
| 4770 | 3810 | 7 | 0 | 16.50355257 | 24.32735498 | 66.75019124 |
| 4771 | 3811 | 7 | 0 | 21.21885331 | 25.19618909 | 68.16688978 |
| 4772 | 3812 | 7 | 0 | 11.78825184 | 23.45852088 | 68.16688978 |
| 4773 | 3813 | 7 | 0 | 2.357650362 | 26.9338573  | 68.16688978 |
| 4774 | 3814 | 7 | 0 | 7.072951105 | 27.80269141 | 69.58358832 |
| 4775 | 3815 | 7 | 0 | 25.93414963 | 26.0650232  | 69.58358832 |
| 4776 | 3816 | 7 | 0 | 16.50355257 | 26.9338573  | 68.16688978 |
| 4777 | 3817 | 7 | 0 | 21.21885331 | 27.80269141 | 69.58358832 |
| 4778 | 3818 | 7 | 0 | 11.78825184 | 26.0650232  | 69.58358832 |
| 4779 | 3819 | 7 | 0 | 2.357650362 | 29.54035962 | 69.58358832 |
| 4780 | 3820 | 7 | 0 | 7.072951105 | 30.40919373 | 71.00028686 |
| 4781 | 3821 | 7 | 0 | 25.93414963 | 28.67152552 | 71.00028686 |
| 4782 | 3822 | 7 | 0 | 16.50355257 | 29.54035962 | 69.58358832 |
| 4783 | 3823 | 7 | 0 | 21.21885331 | 30.40919373 | 71.00028686 |
| 4784 | 3824 | 7 | 0 | 11.78825184 | 28.67152552 | 71.00028686 |
| 4785 | 3825 | 7 | 0 | 7.072951105 | 12.1636775  | 58.25       |
| 4786 | 3826 | 7 | 0 | 25.93414963 | 10.42600928 | 58.25       |
| 4787 | 3827 | 7 | 0 | 21.21885331 | 12.1636775  | 58.25       |
| 4788 | 3828 | 7 | 0 | 11.78825184 | 10.42600928 | 58.25       |
| 4789 | 3829 | 7 | 0 | 2.357650362 | 13.9013457  | 58.25       |
| 4790 | 3830 | 7 | 0 | 7.072951105 | 14.77017982 | 59.66669854 |
| 4791 | 3831 | 7 | 0 | 25.93414963 | 13.0325116  | 59.66669854 |
| 4792 | 3832 | 7 | 0 | 16.50355257 | 13.9013457  | 58.25       |
| 4793 | 3833 | 7 | 0 | 21.21885331 | 14.77017982 | 59.66669854 |
| 4794 | 3834 | 7 | 0 | 11.78825184 | 13.0325116  | 59.66669854 |
| 4795 | 3835 | 7 | 0 | 2.357650362 | 16.50784802 | 59.66669854 |

|      |      |   |   |             |             |             |
|------|------|---|---|-------------|-------------|-------------|
| 4796 | 3836 | 7 | 0 | 7.072951105 | 17.37668214 | 61.08339708 |
| 4797 | 3837 | 7 | 0 | 25.93414963 | 15.63901392 | 61.08339708 |
| 4798 | 3838 | 7 | 0 | 16.50355257 | 16.50784802 | 59.66669854 |
| 4799 | 3839 | 7 | 0 | 21.21885331 | 17.37668214 | 61.08339708 |
| 4800 | 3840 | 7 | 0 | 11.78825184 | 15.63901392 | 61.08339708 |
| 4801 | 3841 | 7 | 0 | 2.357650362 | 19.11435034 | 61.08339708 |
| 4802 | 3842 | 7 | 0 | 7.072951105 | 19.98318446 | 62.50009562 |
| 4803 | 3843 | 7 | 0 | 25.93414963 | 18.24551624 | 62.50009562 |
| 4804 | 3844 | 7 | 0 | 16.50355257 | 19.11435034 | 61.08339708 |
| 4805 | 3845 | 7 | 0 | 21.21885331 | 19.98318446 | 62.50009562 |
| 4806 | 3846 | 7 | 0 | 11.78825184 | 18.24551624 | 62.50009562 |
| 4807 | 3847 | 7 | 0 | 2.357650362 | 21.72085266 | 62.50009562 |
| 4808 | 3848 | 7 | 0 | 7.072951105 | 22.58968677 | 63.91679416 |
| 4809 | 3849 | 7 | 0 | 25.93414963 | 20.85201856 | 63.91679416 |
| 4810 | 3850 | 7 | 0 | 16.50355257 | 21.72085266 | 62.50009562 |
| 4811 | 3851 | 7 | 0 | 21.21885331 | 22.58968677 | 63.91679416 |
| 4812 | 3852 | 7 | 0 | 11.78825184 | 20.85201856 | 63.91679416 |
| 4813 | 3853 | 7 | 0 | 2.357650362 | 24.32735498 | 63.91679416 |
| 4814 | 3854 | 7 | 0 | 7.072951105 | 25.19618909 | 65.3334927  |
| 4815 | 3855 | 7 | 0 | 25.93414963 | 23.45852088 | 65.3334927  |
| 4816 | 3856 | 7 | 0 | 16.50355257 | 24.32735498 | 63.91679416 |
| 4817 | 3857 | 7 | 0 | 21.21885331 | 25.19618909 | 65.3334927  |
| 4818 | 3858 | 7 | 0 | 11.78825184 | 23.45852088 | 65.3334927  |
| 4819 | 3859 | 7 | 0 | 2.357650362 | 26.9338573  | 65.3334927  |
| 4820 | 3860 | 7 | 0 | 7.072951105 | 27.80269141 | 66.75019124 |
| 4821 | 3861 | 7 | 0 | 25.93414963 | 26.0650232  | 66.75019124 |
| 4822 | 3862 | 7 | 0 | 16.50355257 | 26.9338573  | 65.3334927  |
| 4823 | 3863 | 7 | 0 | 21.21885331 | 27.80269141 | 66.75019124 |
| 4824 | 3864 | 7 | 0 | 11.78825184 | 26.0650232  | 66.75019124 |
| 4825 | 3865 | 7 | 0 | 2.357650362 | 29.54035962 | 66.75019124 |
| 4826 | 3866 | 7 | 0 | 7.072951105 | 30.40919373 | 68.16688978 |
| 4827 | 3867 | 7 | 0 | 25.93414963 | 28.67152552 | 68.16688978 |
| 4828 | 3868 | 7 | 0 | 16.50355257 | 29.54035962 | 66.75019124 |
| 4829 | 3869 | 7 | 0 | 21.21885331 | 30.40919373 | 68.16688978 |
| 4830 | 3870 | 7 | 0 | 11.78825184 | 28.67152552 | 68.16688978 |
| 4831 | 3871 | 7 | 0 | 7.072951105 | 17.37668214 | 58.25       |
| 4832 | 3872 | 7 | 0 | 25.93414963 | 15.63901392 | 58.25       |
| 4833 | 3873 | 7 | 0 | 21.21885331 | 17.37668214 | 58.25       |
| 4834 | 3874 | 7 | 0 | 11.78825184 | 15.63901392 | 58.25       |
| 4835 | 3875 | 7 | 0 | 2.357650362 | 19.11435034 | 58.25       |
| 4836 | 3876 | 7 | 0 | 7.072951105 | 19.98318446 | 59.66669854 |
| 4837 | 3877 | 7 | 0 | 25.93414963 | 18.24551624 | 59.66669854 |
| 4838 | 3878 | 7 | 0 | 16.50355257 | 19.11435034 | 58.25       |
| 4839 | 3879 | 7 | 0 | 21.21885331 | 19.98318446 | 59.66669854 |
| 4840 | 3880 | 7 | 0 | 11.78825184 | 18.24551624 | 59.66669854 |
| 4841 | 3881 | 7 | 0 | 2.357650362 | 21.72085266 | 59.66669854 |
| 4842 | 3882 | 7 | 0 | 7.072951105 | 22.58968677 | 61.08339708 |
| 4843 | 3883 | 7 | 0 | 25.93414963 | 20.85201856 | 61.08339708 |
| 4844 | 3884 | 7 | 0 | 16.50355257 | 21.72085266 | 59.66669854 |
| 4845 | 3885 | 7 | 0 | 21.21885331 | 22.58968677 | 61.08339708 |
| 4846 | 3886 | 7 | 0 | 11.78825184 | 20.85201856 | 61.08339708 |



|      |      |   |   |             |             |             |
|------|------|---|---|-------------|-------------|-------------|
| 4847 | 3887 | 7 | 0 | 2.357650362 | 24.32735498 | 61.08339708 |
| 4848 | 3888 | 7 | 0 | 7.072951105 | 25.19618909 | 62.50009562 |
| 4849 | 3889 | 7 | 0 | 25.93414963 | 23.45852088 | 62.50009562 |
| 4850 | 3890 | 7 | 0 | 16.50355257 | 24.32735498 | 61.08339708 |
| 4851 | 3891 | 7 | 0 | 21.21885331 | 25.19618909 | 62.50009562 |
| 4852 | 3892 | 7 | 0 | 11.78825184 | 23.45852088 | 62.50009562 |
| 4853 | 3893 | 7 | 0 | 2.357650362 | 26.9338573  | 62.50009562 |
| 4854 | 3894 | 7 | 0 | 7.072951105 | 27.80269141 | 63.91679416 |
| 4855 | 3895 | 7 | 0 | 25.93414963 | 26.0650232  | 63.91679416 |
| 4856 | 3896 | 7 | 0 | 16.50355257 | 26.9338573  | 62.50009562 |
| 4857 | 3897 | 7 | 0 | 21.21885331 | 27.80269141 | 63.91679416 |
| 4858 | 3898 | 7 | 0 | 11.78825184 | 26.0650232  | 63.91679416 |
| 4859 | 3899 | 7 | 0 | 2.357650362 | 29.54035962 | 63.91679416 |
| 4860 | 3900 | 7 | 0 | 7.072951105 | 30.40919373 | 65.3334927  |
| 4861 | 3901 | 7 | 0 | 25.93414963 | 28.67152552 | 65.3334927  |
| 4862 | 3902 | 7 | 0 | 16.50355257 | 29.54035962 | 63.91679416 |
| 4863 | 3903 | 7 | 0 | 21.21885331 | 30.40919373 | 65.3334927  |
| 4864 | 3904 | 7 | 0 | 11.78825184 | 28.67152552 | 65.3334927  |
| 4865 | 3905 | 7 | 0 | 7.072951105 | 22.58968677 | 58.25       |
| 4866 | 3906 | 7 | 0 | 25.93414963 | 20.85201856 | 58.25       |
| 4867 | 3907 | 7 | 0 | 21.21885331 | 22.58968677 | 58.25       |
| 4868 | 3908 | 7 | 0 | 11.78825184 | 20.85201856 | 58.25       |
| 4869 | 3909 | 7 | 0 | 2.357650362 | 24.32735498 | 58.25       |
| 4870 | 3910 | 7 | 0 | 7.072951105 | 25.19618909 | 59.66669854 |
| 4871 | 3911 | 7 | 0 | 25.93414963 | 23.45852088 | 59.66669854 |
| 4872 | 3912 | 7 | 0 | 16.50355257 | 24.32735498 | 58.25       |
| 4873 | 3913 | 7 | 0 | 21.21885331 | 25.19618909 | 59.66669854 |
| 4874 | 3914 | 7 | 0 | 11.78825184 | 23.45852088 | 59.66669854 |
| 4875 | 3915 | 7 | 0 | 2.357650362 | 26.9338573  | 59.66669854 |
| 4876 | 3916 | 7 | 0 | 7.072951105 | 27.80269141 | 61.08339708 |
| 4877 | 3917 | 7 | 0 | 25.93414963 | 26.0650232  | 61.08339708 |
| 4878 | 3918 | 7 | 0 | 16.50355257 | 26.9338573  | 59.66669854 |
| 4879 | 3919 | 7 | 0 | 21.21885331 | 27.80269141 | 61.08339708 |
| 4880 | 3920 | 7 | 0 | 11.78825184 | 26.0650232  | 61.08339708 |
| 4881 | 3921 | 7 | 0 | 2.357650362 | 29.54035962 | 61.08339708 |
| 4882 | 3922 | 7 | 0 | 7.072951105 | 30.40919373 | 62.50009562 |
| 4883 | 3923 | 7 | 0 | 25.93414963 | 28.67152552 | 62.50009562 |
| 4884 | 3924 | 7 | 0 | 16.50355257 | 29.54035962 | 61.08339708 |
| 4885 | 3925 | 7 | 0 | 21.21885331 | 30.40919373 | 62.50009562 |
| 4886 | 3926 | 7 | 0 | 11.78825184 | 28.67152552 | 62.50009562 |
| 4887 | 3927 | 7 | 0 | 7.072951105 | 27.80269141 | 58.25       |
| 4888 | 3928 | 7 | 0 | 25.93414963 | 26.0650232  | 58.25       |
| 4889 | 3929 | 7 | 0 | 21.21885331 | 27.80269141 | 58.25       |
| 4890 | 3930 | 7 | 0 | 11.78825184 | 26.0650232  | 58.25       |
| 4891 | 3931 | 7 | 0 | 2.357650362 | 29.54035962 | 58.25       |
| 4892 | 3932 | 7 | 0 | 7.072951105 | 30.40919373 | 59.66669854 |
| 4893 | 3933 | 7 | 0 | 25.93414963 | 28.67152552 | 59.66669854 |
| 4894 | 3934 | 7 | 0 | 16.50355257 | 29.54035962 | 58.25       |
| 4895 | 3935 | 7 | 0 | 21.21885331 | 30.40919373 | 59.66669854 |
| 4896 | 3936 | 7 | 0 | 11.78825184 | 28.67152552 | 59.66669854 |
| 4897 | 3937 | 8 | 0 | 6.038211359 | 0.86883411  | 85.16727226 |

|      |      |   |   |             |             |             |
|------|------|---|---|-------------|-------------|-------------|
| 4898 | 3938 | 8 | 0 | 3.392390108 | 1.73766822  | 86.5839708  |
| 4899 | 3939 | 8 | 0 | 10.75350738 | 1.73766822  | 86.5839708  |
| 4900 | 3940 | 8 | 0 | 8.107700279 | 0           | 86.5839708  |
| 4901 | 3941 | 8 | 0 | 1.32290119  | 0           | 86.5839708  |
| 4902 | 3942 | 8 | 0 | 26.96889408 | 0.86883411  | 85.16727226 |
| 4903 | 3943 | 8 | 0 | 20.18411357 | 0.86883411  | 85.16727226 |
| 4904 | 3944 | 8 | 0 | 17.53829232 | 1.73766822  | 86.5839708  |
| 4905 | 3945 | 8 | 0 | 24.89940959 | 1.73766822  | 86.5839708  |
| 4906 | 3946 | 8 | 0 | 22.25360249 | 0           | 86.5839708  |
| 4907 | 3947 | 8 | 0 | 15.4688034  | 0           | 86.5839708  |
| 4908 | 3948 | 8 | 0 | 12.82299629 | 0.86883411  | 85.16727226 |
| 4909 | 3949 | 8 | 0 | 6.038211359 | 3.475336426 | 86.5839708  |
| 4910 | 3950 | 8 | 0 | 26.96889408 | 3.475336426 | 86.5839708  |
| 4911 | 3951 | 8 | 0 | 20.18411357 | 3.475336426 | 86.5839708  |
| 4912 | 3952 | 8 | 0 | 12.82299629 | 3.475336426 | 86.5839708  |
| 4913 | 3953 | 8 | 0 | 6.038211359 | 0.86883411  | 82.33387518 |
| 4914 | 3954 | 8 | 0 | 3.392390108 | 1.73766822  | 83.75057372 |
| 4915 | 3955 | 8 | 0 | 10.75350738 | 1.73766822  | 83.75057372 |
| 4916 | 3956 | 8 | 0 | 8.107700279 | 0           | 83.75057372 |
| 4917 | 3957 | 8 | 0 | 1.32290119  | 0           | 83.75057372 |
| 4918 | 3958 | 8 | 0 | 26.96889408 | 0.86883411  | 82.33387518 |
| 4919 | 3959 | 8 | 0 | 20.18411357 | 0.86883411  | 82.33387518 |
| 4920 | 3960 | 8 | 0 | 17.53829232 | 1.73766822  | 83.75057372 |
| 4921 | 3961 | 8 | 0 | 24.89940959 | 1.73766822  | 83.75057372 |
| 4922 | 3962 | 8 | 0 | 22.25360249 | 0           | 83.75057372 |
| 4923 | 3963 | 8 | 0 | 15.4688034  | 0           | 83.75057372 |
| 4924 | 3964 | 8 | 0 | 12.82299629 | 0.86883411  | 82.33387518 |
| 4925 | 3965 | 8 | 0 | 6.038211359 | 3.475336426 | 83.75057372 |
| 4926 | 3966 | 8 | 0 | 3.392390108 | 4.34417054  | 85.16727226 |
| 4927 | 3967 | 8 | 0 | 10.75350738 | 4.34417054  | 85.16727226 |
| 4928 | 3968 | 8 | 0 | 8.107700279 | 2.60650232  | 85.16727226 |
| 4929 | 3969 | 8 | 0 | 1.32290119  | 2.60650232  | 85.16727226 |
| 4930 | 3970 | 8 | 0 | 26.96889408 | 3.475336426 | 83.75057372 |
| 4931 | 3971 | 8 | 0 | 20.18411357 | 3.475336426 | 83.75057372 |
| 4932 | 3972 | 8 | 0 | 17.53829232 | 4.34417054  | 85.16727226 |
| 4933 | 3973 | 8 | 0 | 24.89940959 | 4.34417054  | 85.16727226 |
| 4934 | 3974 | 8 | 0 | 22.25360249 | 2.60650232  | 85.16727226 |
| 4935 | 3975 | 8 | 0 | 15.4688034  | 2.60650232  | 85.16727226 |
| 4936 | 3976 | 8 | 0 | 12.82299629 | 3.475336426 | 83.75057372 |
| 4937 | 3977 | 8 | 0 | 6.038211359 | 6.081838745 | 85.16727226 |
| 4938 | 3978 | 8 | 0 | 3.392390108 | 6.950672859 | 86.5839708  |
| 4939 | 3979 | 8 | 0 | 10.75350738 | 6.950672859 | 86.5839708  |
| 4940 | 3980 | 8 | 0 | 8.107700279 | 5.213004642 | 86.5839708  |
| 4941 | 3981 | 8 | 0 | 1.32290119  | 5.213004642 | 86.5839708  |
| 4942 | 3982 | 8 | 0 | 26.96889408 | 6.081838745 | 85.16727226 |
| 4943 | 3983 | 8 | 0 | 20.18411357 | 6.081838745 | 85.16727226 |
| 4944 | 3984 | 8 | 0 | 17.53829232 | 6.950672859 | 86.5839708  |
| 4945 | 3985 | 8 | 0 | 24.89940959 | 6.950672859 | 86.5839708  |
| 4946 | 3986 | 8 | 0 | 22.25360249 | 5.213004642 | 86.5839708  |
| 4947 | 3987 | 8 | 0 | 15.4688034  | 5.213004642 | 86.5839708  |
| 4948 | 3988 | 8 | 0 | 12.82299629 | 6.081838745 | 85.16727226 |

|      |      |   |   |             |             |             |
|------|------|---|---|-------------|-------------|-------------|
| 4949 | 3989 | 8 | 0 | 6.038211359 | 8.688341064 | 86.5839708  |
| 4950 | 3990 | 8 | 0 | 26.96889408 | 8.688341064 | 86.5839708  |
| 4951 | 3991 | 8 | 0 | 20.18411357 | 8.688341064 | 86.5839708  |
| 4952 | 3992 | 8 | 0 | 12.82299629 | 8.688341064 | 86.5839708  |
| 4953 | 3993 | 8 | 0 | 6.038211359 | 0.86883411  | 79.5004781  |
| 4954 | 3994 | 8 | 0 | 3.392390108 | 1.73766822  | 80.91717664 |
| 4955 | 3995 | 8 | 0 | 10.75350738 | 1.73766822  | 80.91717664 |
| 4956 | 3996 | 8 | 0 | 8.107700279 | 0           | 80.91717664 |
| 4957 | 3997 | 8 | 0 | 1.32290119  | 0           | 80.91717664 |
| 4958 | 3998 | 8 | 0 | 26.96889408 | 0.86883411  | 79.5004781  |
| 4959 | 3999 | 8 | 0 | 20.18411357 | 0.86883411  | 79.5004781  |
| 4960 | 4000 | 8 | 0 | 17.53829232 | 1.73766822  | 80.91717664 |
| 4961 | 4001 | 8 | 0 | 24.89940959 | 1.73766822  | 80.91717664 |
| 4962 | 4002 | 8 | 0 | 22.25360249 | 0           | 80.91717664 |
| 4963 | 4003 | 8 | 0 | 15.4688034  | 0           | 80.91717664 |
| 4964 | 4004 | 8 | 0 | 12.82299629 | 0.86883411  | 79.5004781  |
| 4965 | 4005 | 8 | 0 | 6.038211359 | 3.475336426 | 80.91717664 |
| 4966 | 4006 | 8 | 0 | 3.392390108 | 4.34417054  | 82.33387518 |
| 4967 | 4007 | 8 | 0 | 10.75350738 | 4.34417054  | 82.33387518 |
| 4968 | 4008 | 8 | 0 | 8.107700279 | 2.60650232  | 82.33387518 |
| 4969 | 4009 | 8 | 0 | 1.32290119  | 2.60650232  | 82.33387518 |
| 4970 | 4010 | 8 | 0 | 26.96889408 | 3.475336426 | 80.91717664 |
| 4971 | 4011 | 8 | 0 | 20.18411357 | 3.475336426 | 80.91717664 |
| 4972 | 4012 | 8 | 0 | 17.53829232 | 4.34417054  | 82.33387518 |
| 4973 | 4013 | 8 | 0 | 24.89940959 | 4.34417054  | 82.33387518 |
| 4974 | 4014 | 8 | 0 | 22.25360249 | 2.60650232  | 82.33387518 |
| 4975 | 4015 | 8 | 0 | 15.4688034  | 2.60650232  | 82.33387518 |
| 4976 | 4016 | 8 | 0 | 12.82299629 | 3.475336426 | 80.91717664 |
| 4977 | 4017 | 8 | 0 | 6.038211359 | 6.081838745 | 82.33387518 |
| 4978 | 4018 | 8 | 0 | 3.392390108 | 6.950672859 | 83.75057372 |
| 4979 | 4019 | 8 | 0 | 10.75350738 | 6.950672859 | 83.75057372 |
| 4980 | 4020 | 8 | 0 | 8.107700279 | 5.213004642 | 83.75057372 |
| 4981 | 4021 | 8 | 0 | 1.32290119  | 5.213004642 | 83.75057372 |
| 4982 | 4022 | 8 | 0 | 26.96889408 | 6.081838745 | 82.33387518 |
| 4983 | 4023 | 8 | 0 | 20.18411357 | 6.081838745 | 82.33387518 |
| 4984 | 4024 | 8 | 0 | 17.53829232 | 6.950672859 | 83.75057372 |
| 4985 | 4025 | 8 | 0 | 24.89940959 | 6.950672859 | 83.75057372 |
| 4986 | 4026 | 8 | 0 | 22.25360249 | 5.213004642 | 83.75057372 |
| 4987 | 4027 | 8 | 0 | 15.4688034  | 5.213004642 | 83.75057372 |
| 4988 | 4028 | 8 | 0 | 12.82299629 | 6.081838745 | 82.33387518 |
| 4989 | 4029 | 8 | 0 | 6.038211359 | 8.688341064 | 83.75057372 |
| 4990 | 4030 | 8 | 0 | 3.392390108 | 9.557175178 | 85.16727226 |
| 4991 | 4031 | 8 | 0 | 10.75350738 | 9.557175178 | 85.16727226 |
| 4992 | 4032 | 8 | 0 | 8.107700279 | 7.819506962 | 85.16727226 |
| 4993 | 4033 | 8 | 0 | 1.32290119  | 7.819506962 | 85.16727226 |
| 4994 | 4034 | 8 | 0 | 26.96889408 | 8.688341064 | 83.75057372 |
| 4995 | 4035 | 8 | 0 | 20.18411357 | 8.688341064 | 83.75057372 |
| 4996 | 4036 | 8 | 0 | 17.53829232 | 9.557175178 | 85.16727226 |
| 4997 | 4037 | 8 | 0 | 24.89940959 | 9.557175178 | 85.16727226 |
| 4998 | 4038 | 8 | 0 | 22.25360249 | 7.819506962 | 85.16727226 |
| 4999 | 4039 | 8 | 0 | 15.4688034  | 7.819506962 | 85.16727226 |

|      |      |   |   |             |             |             |
|------|------|---|---|-------------|-------------|-------------|
| 5000 | 4040 | 8 | 0 | 12.82299629 | 8.688341064 | 83.75057372 |
| 5001 | 4041 | 8 | 0 | 6.038211359 | 11.29484338 | 85.16727226 |
| 5002 | 4042 | 8 | 0 | 3.392390108 | 12.1636775  | 86.5839708  |
| 5003 | 4043 | 8 | 0 | 10.75350738 | 12.1636775  | 86.5839708  |
| 5004 | 4044 | 8 | 0 | 8.107700279 | 10.42600928 | 86.5839708  |
| 5005 | 4045 | 8 | 0 | 1.32290119  | 10.42600928 | 86.5839708  |
| 5006 | 4046 | 8 | 0 | 26.96889408 | 11.29484338 | 85.16727226 |
| 5007 | 4047 | 8 | 0 | 20.18411357 | 11.29484338 | 85.16727226 |
| 5008 | 4048 | 8 | 0 | 17.53829232 | 12.1636775  | 86.5839708  |
| 5009 | 4049 | 8 | 0 | 24.89940959 | 12.1636775  | 86.5839708  |
| 5010 | 4050 | 8 | 0 | 22.25360249 | 10.42600928 | 86.5839708  |
| 5011 | 4051 | 8 | 0 | 15.4688034  | 10.42600928 | 86.5839708  |
| 5012 | 4052 | 8 | 0 | 12.82299629 | 11.29484338 | 85.16727226 |
| 5013 | 4053 | 8 | 0 | 6.038211359 | 13.9013457  | 86.5839708  |
| 5014 | 4054 | 8 | 0 | 26.96889408 | 13.9013457  | 86.5839708  |
| 5015 | 4055 | 8 | 0 | 20.18411357 | 13.9013457  | 86.5839708  |
| 5016 | 4056 | 8 | 0 | 12.82299629 | 13.9013457  | 86.5839708  |
| 5017 | 4057 | 8 | 0 | 6.038211359 | 0.86883411  | 76.66708102 |
| 5018 | 4058 | 8 | 0 | 3.392390108 | 1.73766822  | 78.08377956 |
| 5019 | 4059 | 8 | 0 | 10.75350738 | 1.73766822  | 78.08377956 |
| 5020 | 4060 | 8 | 0 | 8.107700279 | 0           | 78.08377956 |
| 5021 | 4061 | 8 | 0 | 1.32290119  | 0           | 78.08377956 |
| 5022 | 4062 | 8 | 0 | 26.96889408 | 0.86883411  | 76.66708102 |
| 5023 | 4063 | 8 | 0 | 20.18411357 | 0.86883411  | 76.66708102 |
| 5024 | 4064 | 8 | 0 | 17.53829232 | 1.73766822  | 78.08377956 |
| 5025 | 4065 | 8 | 0 | 24.89940959 | 1.73766822  | 78.08377956 |
| 5026 | 4066 | 8 | 0 | 22.25360249 | 0           | 78.08377956 |
| 5027 | 4067 | 8 | 0 | 15.4688034  | 0           | 78.08377956 |
| 5028 | 4068 | 8 | 0 | 12.82299629 | 0.86883411  | 76.66708102 |
| 5029 | 4069 | 8 | 0 | 6.038211359 | 3.475336426 | 78.08377956 |
| 5030 | 4070 | 8 | 0 | 3.392390108 | 4.34417054  | 79.5004781  |
| 5031 | 4071 | 8 | 0 | 10.75350738 | 4.34417054  | 79.5004781  |
| 5032 | 4072 | 8 | 0 | 8.107700279 | 2.60650232  | 79.5004781  |
| 5033 | 4073 | 8 | 0 | 1.32290119  | 2.60650232  | 79.5004781  |
| 5034 | 4074 | 8 | 0 | 26.96889408 | 3.475336426 | 78.08377956 |
| 5035 | 4075 | 8 | 0 | 20.18411357 | 3.475336426 | 78.08377956 |
| 5036 | 4076 | 8 | 0 | 17.53829232 | 4.34417054  | 79.5004781  |
| 5037 | 4077 | 8 | 0 | 24.89940959 | 4.34417054  | 79.5004781  |
| 5038 | 4078 | 8 | 0 | 22.25360249 | 2.60650232  | 79.5004781  |
| 5039 | 4079 | 8 | 0 | 15.4688034  | 2.60650232  | 79.5004781  |
| 5040 | 4080 | 8 | 0 | 12.82299629 | 3.475336426 | 78.08377956 |
| 5041 | 4081 | 8 | 0 | 6.038211359 | 6.081838745 | 79.5004781  |
| 5042 | 4082 | 8 | 0 | 3.392390108 | 6.950672859 | 80.91717664 |
| 5043 | 4083 | 8 | 0 | 10.75350738 | 6.950672859 | 80.91717664 |
| 5044 | 4084 | 8 | 0 | 8.107700279 | 5.213004642 | 80.91717664 |
| 5045 | 4085 | 8 | 0 | 1.32290119  | 5.213004642 | 80.91717664 |
| 5046 | 4086 | 8 | 0 | 26.96889408 | 6.081838745 | 79.5004781  |
| 5047 | 4087 | 8 | 0 | 20.18411357 | 6.081838745 | 79.5004781  |
| 5048 | 4088 | 8 | 0 | 17.53829232 | 6.950672859 | 80.91717664 |
| 5049 | 4089 | 8 | 0 | 24.89940959 | 6.950672859 | 80.91717664 |
| 5050 | 4090 | 8 | 0 | 22.25360249 | 5.213004642 | 80.91717664 |

|      |      |   |   |             |             |             |
|------|------|---|---|-------------|-------------|-------------|
| 5051 | 4091 | 8 | 0 | 15.4688034  | 5.213004642 | 80.91717664 |
| 5052 | 4092 | 8 | 0 | 12.82299629 | 6.081838745 | 79.5004781  |
| 5053 | 4093 | 8 | 0 | 6.038211359 | 8.688341064 | 80.91717664 |
| 5054 | 4094 | 8 | 0 | 3.392390108 | 9.557175178 | 82.33387518 |
| 5055 | 4095 | 8 | 0 | 10.75350738 | 9.557175178 | 82.33387518 |
| 5056 | 4096 | 8 | 0 | 8.107700279 | 7.819506962 | 82.33387518 |
| 5057 | 4097 | 8 | 0 | 1.32290119  | 7.819506962 | 82.33387518 |
| 5058 | 4098 | 8 | 0 | 26.96889408 | 8.688341064 | 80.91717664 |
| 5059 | 4099 | 8 | 0 | 20.18411357 | 8.688341064 | 80.91717664 |
| 5060 | 4100 | 8 | 0 | 17.53829232 | 9.557175178 | 82.33387518 |
| 5061 | 4101 | 8 | 0 | 24.89940959 | 9.557175178 | 82.33387518 |
| 5062 | 4102 | 8 | 0 | 22.25360249 | 7.819506962 | 82.33387518 |
| 5063 | 4103 | 8 | 0 | 15.4688034  | 7.819506962 | 82.33387518 |
| 5064 | 4104 | 8 | 0 | 12.82299629 | 8.688341064 | 80.91717664 |
| 5065 | 4105 | 8 | 0 | 6.038211359 | 11.29484338 | 82.33387518 |
| 5066 | 4106 | 8 | 0 | 3.392390108 | 12.1636775  | 83.75057372 |
| 5067 | 4107 | 8 | 0 | 10.75350738 | 12.1636775  | 83.75057372 |
| 5068 | 4108 | 8 | 0 | 8.107700279 | 10.42600928 | 83.75057372 |
| 5069 | 4109 | 8 | 0 | 1.32290119  | 10.42600928 | 83.75057372 |
| 5070 | 4110 | 8 | 0 | 26.96889408 | 11.29484338 | 82.33387518 |
| 5071 | 4111 | 8 | 0 | 20.18411357 | 11.29484338 | 82.33387518 |
| 5072 | 4112 | 8 | 0 | 17.53829232 | 12.1636775  | 83.75057372 |
| 5073 | 4113 | 8 | 0 | 24.89940959 | 12.1636775  | 83.75057372 |
| 5074 | 4114 | 8 | 0 | 22.25360249 | 10.42600928 | 83.75057372 |
| 5075 | 4115 | 8 | 0 | 15.4688034  | 10.42600928 | 83.75057372 |
| 5076 | 4116 | 8 | 0 | 12.82299629 | 11.29484338 | 82.33387518 |
| 5077 | 4117 | 8 | 0 | 6.038211359 | 13.9013457  | 83.75057372 |
| 5078 | 4118 | 8 | 0 | 3.392390108 | 14.77017982 | 85.16727226 |
| 5079 | 4119 | 8 | 0 | 10.75350738 | 14.77017982 | 85.16727226 |
| 5080 | 4120 | 8 | 0 | 8.107700279 | 13.0325116  | 85.16727226 |
| 5081 | 4121 | 8 | 0 | 1.32290119  | 13.0325116  | 85.16727226 |
| 5082 | 4122 | 8 | 0 | 26.96889408 | 13.9013457  | 83.75057372 |
| 5083 | 4123 | 8 | 0 | 20.18411357 | 13.9013457  | 83.75057372 |
| 5084 | 4124 | 8 | 0 | 17.53829232 | 14.77017982 | 85.16727226 |
| 5085 | 4125 | 8 | 0 | 24.89940959 | 14.77017982 | 85.16727226 |
| 5086 | 4126 | 8 | 0 | 22.25360249 | 13.0325116  | 85.16727226 |
| 5087 | 4127 | 8 | 0 | 15.4688034  | 13.0325116  | 85.16727226 |
| 5088 | 4128 | 8 | 0 | 12.82299629 | 13.9013457  | 83.75057372 |
| 5089 | 4129 | 8 | 0 | 6.038211359 | 16.50784802 | 85.16727226 |
| 5090 | 4130 | 8 | 0 | 3.392390108 | 17.37668214 | 86.5839708  |
| 5091 | 4131 | 8 | 0 | 10.75350738 | 17.37668214 | 86.5839708  |
| 5092 | 4132 | 8 | 0 | 8.107700279 | 15.63901392 | 86.5839708  |
| 5093 | 4133 | 8 | 0 | 1.32290119  | 15.63901392 | 86.5839708  |
| 5094 | 4134 | 8 | 0 | 26.96889408 | 16.50784802 | 85.16727226 |
| 5095 | 4135 | 8 | 0 | 20.18411357 | 16.50784802 | 85.16727226 |
| 5096 | 4136 | 8 | 0 | 17.53829232 | 17.37668214 | 86.5839708  |
| 5097 | 4137 | 8 | 0 | 24.89940959 | 17.37668214 | 86.5839708  |
| 5098 | 4138 | 8 | 0 | 22.25360249 | 15.63901392 | 86.5839708  |
| 5099 | 4139 | 8 | 0 | 15.4688034  | 15.63901392 | 86.5839708  |
| 5100 | 4140 | 8 | 0 | 12.82299629 | 16.50784802 | 85.16727226 |
| 5101 | 4141 | 8 | 0 | 6.038211359 | 19.11435034 | 86.5839708  |

|      |      |   |   |             |             |             |
|------|------|---|---|-------------|-------------|-------------|
| 5102 | 4142 | 8 | 0 | 26.96889408 | 19.11435034 | 86.5839708  |
| 5103 | 4143 | 8 | 0 | 20.18411357 | 19.11435034 | 86.5839708  |
| 5104 | 4144 | 8 | 0 | 12.82299629 | 19.11435034 | 86.5839708  |
| 5105 | 4145 | 8 | 0 | 6.038211359 | 0.86883411  | 73.83368394 |
| 5106 | 4146 | 8 | 0 | 3.392390108 | 1.73766822  | 75.25038248 |
| 5107 | 4147 | 8 | 0 | 10.75350738 | 1.73766822  | 75.25038248 |
| 5108 | 4148 | 8 | 0 | 8.107700279 | 0           | 75.25038248 |
| 5109 | 4149 | 8 | 0 | 1.32290119  | 0           | 75.25038248 |
| 5110 | 4150 | 8 | 0 | 26.96889408 | 0.86883411  | 73.83368394 |
| 5111 | 4151 | 8 | 0 | 20.18411357 | 0.86883411  | 73.83368394 |
| 5112 | 4152 | 8 | 0 | 17.53829232 | 1.73766822  | 75.25038248 |
| 5113 | 4153 | 8 | 0 | 24.89940959 | 1.73766822  | 75.25038248 |
| 5114 | 4154 | 8 | 0 | 22.25360249 | 0           | 75.25038248 |
| 5115 | 4155 | 8 | 0 | 15.4688034  | 0           | 75.25038248 |
| 5116 | 4156 | 8 | 0 | 12.82299629 | 0.86883411  | 73.83368394 |
| 5117 | 4157 | 8 | 0 | 6.038211359 | 3.475336426 | 75.25038248 |
| 5118 | 4158 | 8 | 0 | 3.392390108 | 4.34417054  | 76.66708102 |
| 5119 | 4159 | 8 | 0 | 10.75350738 | 4.34417054  | 76.66708102 |
| 5120 | 4160 | 8 | 0 | 8.107700279 | 2.60650232  | 76.66708102 |
| 5121 | 4161 | 8 | 0 | 1.32290119  | 2.60650232  | 76.66708102 |
| 5122 | 4162 | 8 | 0 | 26.96889408 | 3.475336426 | 75.25038248 |
| 5123 | 4163 | 8 | 0 | 20.18411357 | 3.475336426 | 75.25038248 |
| 5124 | 4164 | 8 | 0 | 17.53829232 | 4.34417054  | 76.66708102 |
| 5125 | 4165 | 8 | 0 | 24.89940959 | 4.34417054  | 76.66708102 |
| 5126 | 4166 | 8 | 0 | 22.25360249 | 2.60650232  | 76.66708102 |
| 5127 | 4167 | 8 | 0 | 15.4688034  | 2.60650232  | 76.66708102 |
| 5128 | 4168 | 8 | 0 | 12.82299629 | 3.475336426 | 75.25038248 |
| 5129 | 4169 | 8 | 0 | 6.038211359 | 6.081838745 | 76.66708102 |
| 5130 | 4170 | 8 | 0 | 3.392390108 | 6.950672859 | 78.08377956 |
| 5131 | 4171 | 8 | 0 | 10.75350738 | 6.950672859 | 78.08377956 |
| 5132 | 4172 | 8 | 0 | 8.107700279 | 5.213004642 | 78.08377956 |
| 5133 | 4173 | 8 | 0 | 1.32290119  | 5.213004642 | 78.08377956 |
| 5134 | 4174 | 8 | 0 | 26.96889408 | 6.081838745 | 76.66708102 |
| 5135 | 4175 | 8 | 0 | 20.18411357 | 6.081838745 | 76.66708102 |
| 5136 | 4176 | 8 | 0 | 17.53829232 | 6.950672859 | 78.08377956 |
| 5137 | 4177 | 8 | 0 | 24.89940959 | 6.950672859 | 78.08377956 |
| 5138 | 4178 | 8 | 0 | 22.25360249 | 5.213004642 | 78.08377956 |
| 5139 | 4179 | 8 | 0 | 15.4688034  | 5.213004642 | 78.08377956 |
| 5140 | 4180 | 8 | 0 | 12.82299629 | 6.081838745 | 76.66708102 |
| 5141 | 4181 | 8 | 0 | 6.038211359 | 8.688341064 | 78.08377956 |
| 5142 | 4182 | 8 | 0 | 3.392390108 | 9.557175178 | 79.5004781  |
| 5143 | 4183 | 8 | 0 | 10.75350738 | 9.557175178 | 79.5004781  |
| 5144 | 4184 | 8 | 0 | 8.107700279 | 7.819506962 | 79.5004781  |
| 5145 | 4185 | 8 | 0 | 1.32290119  | 7.819506962 | 79.5004781  |
| 5146 | 4186 | 8 | 0 | 26.96889408 | 8.688341064 | 78.08377956 |
| 5147 | 4187 | 8 | 0 | 20.18411357 | 8.688341064 | 78.08377956 |
| 5148 | 4188 | 8 | 0 | 17.53829232 | 9.557175178 | 79.5004781  |
| 5149 | 4189 | 8 | 0 | 24.89940959 | 9.557175178 | 79.5004781  |
| 5150 | 4190 | 8 | 0 | 22.25360249 | 7.819506962 | 79.5004781  |
| 5151 | 4191 | 8 | 0 | 15.4688034  | 7.819506962 | 79.5004781  |
| 5152 | 4192 | 8 | 0 | 12.82299629 | 8.688341064 | 78.08377956 |

|      |      |   |   |             |             |             |
|------|------|---|---|-------------|-------------|-------------|
| 5153 | 4193 | 8 | 0 | 6.038211359 | 11.29484338 | 79.5004781  |
| 5154 | 4194 | 8 | 0 | 3.392390108 | 12.1636775  | 80.91717664 |
| 5155 | 4195 | 8 | 0 | 10.75350738 | 12.1636775  | 80.91717664 |
| 5156 | 4196 | 8 | 0 | 8.107700279 | 10.42600928 | 80.91717664 |
| 5157 | 4197 | 8 | 0 | 1.32290119  | 10.42600928 | 80.91717664 |
| 5158 | 4198 | 8 | 0 | 26.96889408 | 11.29484338 | 79.5004781  |
| 5159 | 4199 | 8 | 0 | 20.18411357 | 11.29484338 | 79.5004781  |
| 5160 | 4200 | 8 | 0 | 17.53829232 | 12.1636775  | 80.91717664 |
| 5161 | 4201 | 8 | 0 | 24.89940959 | 12.1636775  | 80.91717664 |
| 5162 | 4202 | 8 | 0 | 22.25360249 | 10.42600928 | 80.91717664 |
| 5163 | 4203 | 8 | 0 | 15.4688034  | 10.42600928 | 80.91717664 |
| 5164 | 4204 | 8 | 0 | 12.82299629 | 11.29484338 | 79.5004781  |
| 5165 | 4205 | 8 | 0 | 6.038211359 | 13.9013457  | 80.91717664 |
| 5166 | 4206 | 8 | 0 | 3.392390108 | 14.77017982 | 82.33387518 |
| 5167 | 4207 | 8 | 0 | 10.75350738 | 14.77017982 | 82.33387518 |
| 5168 | 4208 | 8 | 0 | 8.107700279 | 13.0325116  | 82.33387518 |
| 5169 | 4209 | 8 | 0 | 1.32290119  | 13.0325116  | 82.33387518 |
| 5170 | 4210 | 8 | 0 | 26.96889408 | 13.9013457  | 80.91717664 |
| 5171 | 4211 | 8 | 0 | 20.18411357 | 13.9013457  | 80.91717664 |
| 5172 | 4212 | 8 | 0 | 17.53829232 | 14.77017982 | 82.33387518 |
| 5173 | 4213 | 8 | 0 | 24.89940959 | 14.77017982 | 82.33387518 |
| 5174 | 4214 | 8 | 0 | 22.25360249 | 13.0325116  | 82.33387518 |
| 5175 | 4215 | 8 | 0 | 15.4688034  | 13.0325116  | 82.33387518 |
| 5176 | 4216 | 8 | 0 | 12.82299629 | 13.9013457  | 80.91717664 |
| 5177 | 4217 | 8 | 0 | 6.038211359 | 16.50784802 | 82.33387518 |
| 5178 | 4218 | 8 | 0 | 3.392390108 | 17.37668214 | 83.75057372 |
| 5179 | 4219 | 8 | 0 | 10.75350738 | 17.37668214 | 83.75057372 |
| 5180 | 4220 | 8 | 0 | 8.107700279 | 15.63901392 | 83.75057372 |
| 5181 | 4221 | 8 | 0 | 1.32290119  | 15.63901392 | 83.75057372 |
| 5182 | 4222 | 8 | 0 | 26.96889408 | 16.50784802 | 82.33387518 |
| 5183 | 4223 | 8 | 0 | 20.18411357 | 16.50784802 | 82.33387518 |
| 5184 | 4224 | 8 | 0 | 17.53829232 | 17.37668214 | 83.75057372 |
| 5185 | 4225 | 8 | 0 | 24.89940959 | 17.37668214 | 83.75057372 |
| 5186 | 4226 | 8 | 0 | 22.25360249 | 15.63901392 | 83.75057372 |
| 5187 | 4227 | 8 | 0 | 15.4688034  | 15.63901392 | 83.75057372 |
| 5188 | 4228 | 8 | 0 | 12.82299629 | 16.50784802 | 82.33387518 |
| 5189 | 4229 | 8 | 0 | 6.038211359 | 19.11435034 | 83.75057372 |
| 5190 | 4230 | 8 | 0 | 3.392390108 | 19.98318446 | 85.16727226 |
| 5191 | 4231 | 8 | 0 | 10.75350738 | 19.98318446 | 85.16727226 |
| 5192 | 4232 | 8 | 0 | 8.107700279 | 18.24551624 | 85.16727226 |
| 5193 | 4233 | 8 | 0 | 1.32290119  | 18.24551624 | 85.16727226 |
| 5194 | 4234 | 8 | 0 | 26.96889408 | 19.11435034 | 83.75057372 |
| 5195 | 4235 | 8 | 0 | 20.18411357 | 19.11435034 | 83.75057372 |
| 5196 | 4236 | 8 | 0 | 17.53829232 | 19.98318446 | 85.16727226 |
| 5197 | 4237 | 8 | 0 | 24.89940959 | 19.98318446 | 85.16727226 |
| 5198 | 4238 | 8 | 0 | 22.25360249 | 18.24551624 | 85.16727226 |
| 5199 | 4239 | 8 | 0 | 15.4688034  | 18.24551624 | 85.16727226 |
| 5200 | 4240 | 8 | 0 | 12.82299629 | 19.11435034 | 83.75057372 |
| 5201 | 4241 | 8 | 0 | 6.038211359 | 21.72085266 | 85.16727226 |
| 5202 | 4242 | 8 | 0 | 3.392390108 | 22.58968677 | 86.5839708  |
| 5203 | 4243 | 8 | 0 | 10.75350738 | 22.58968677 | 86.5839708  |

|      |      |   |   |             |             |             |
|------|------|---|---|-------------|-------------|-------------|
| 5204 | 4244 | 8 | 0 | 8.107700279 | 20.85201856 | 86.5839708  |
| 5205 | 4245 | 8 | 0 | 1.32290119  | 20.85201856 | 86.5839708  |
| 5206 | 4246 | 8 | 0 | 26.96889408 | 21.72085266 | 85.16727226 |
| 5207 | 4247 | 8 | 0 | 20.18411357 | 21.72085266 | 85.16727226 |
| 5208 | 4248 | 8 | 0 | 17.53829232 | 22.58968677 | 86.5839708  |
| 5209 | 4249 | 8 | 0 | 24.89940959 | 22.58968677 | 86.5839708  |
| 5210 | 4250 | 8 | 0 | 22.25360249 | 20.85201856 | 86.5839708  |
| 5211 | 4251 | 8 | 0 | 15.4688034  | 20.85201856 | 86.5839708  |
| 5212 | 4252 | 8 | 0 | 12.82299629 | 21.72085266 | 85.16727226 |
| 5213 | 4253 | 8 | 0 | 6.038211359 | 24.32735498 | 86.5839708  |
| 5214 | 4254 | 8 | 0 | 26.96889408 | 24.32735498 | 86.5839708  |
| 5215 | 4255 | 8 | 0 | 20.18411357 | 24.32735498 | 86.5839708  |
| 5216 | 4256 | 8 | 0 | 12.82299629 | 24.32735498 | 86.5839708  |
| 5217 | 4257 | 8 | 0 | 6.038211359 | 0.86883411  | 71.00028686 |
| 5218 | 4258 | 8 | 0 | 3.392390108 | 1.73766822  | 72.4169854  |
| 5219 | 4259 | 8 | 0 | 10.75350738 | 1.73766822  | 72.4169854  |
| 5220 | 4260 | 8 | 0 | 8.107700279 | 0           | 72.4169854  |
| 5221 | 4261 | 8 | 0 | 1.32290119  | 0           | 72.4169854  |
| 5222 | 4262 | 8 | 0 | 26.96889408 | 0.86883411  | 71.00028686 |
| 5223 | 4263 | 8 | 0 | 20.18411357 | 0.86883411  | 71.00028686 |
| 5224 | 4264 | 8 | 0 | 17.53829232 | 1.73766822  | 72.4169854  |
| 5225 | 4265 | 8 | 0 | 24.89940959 | 1.73766822  | 72.4169854  |
| 5226 | 4266 | 8 | 0 | 22.25360249 | 0           | 72.4169854  |
| 5227 | 4267 | 8 | 0 | 15.4688034  | 0           | 72.4169854  |
| 5228 | 4268 | 8 | 0 | 12.82299629 | 0.86883411  | 71.00028686 |
| 5229 | 4269 | 8 | 0 | 6.038211359 | 3.475336426 | 72.4169854  |
| 5230 | 4270 | 8 | 0 | 3.392390108 | 4.34417054  | 73.83368394 |
| 5231 | 4271 | 8 | 0 | 10.75350738 | 4.34417054  | 73.83368394 |
| 5232 | 4272 | 8 | 0 | 8.107700279 | 2.60650232  | 73.83368394 |
| 5233 | 4273 | 8 | 0 | 1.32290119  | 2.60650232  | 73.83368394 |
| 5234 | 4274 | 8 | 0 | 26.96889408 | 3.475336426 | 72.4169854  |
| 5235 | 4275 | 8 | 0 | 20.18411357 | 3.475336426 | 72.4169854  |
| 5236 | 4276 | 8 | 0 | 17.53829232 | 4.34417054  | 73.83368394 |
| 5237 | 4277 | 8 | 0 | 24.89940959 | 4.34417054  | 73.83368394 |
| 5238 | 4278 | 8 | 0 | 22.25360249 | 2.60650232  | 73.83368394 |
| 5239 | 4279 | 8 | 0 | 15.4688034  | 2.60650232  | 73.83368394 |
| 5240 | 4280 | 8 | 0 | 12.82299629 | 3.475336426 | 72.4169854  |
| 5241 | 4281 | 8 | 0 | 6.038211359 | 6.081838745 | 73.83368394 |
| 5242 | 4282 | 8 | 0 | 3.392390108 | 6.950672859 | 75.25038248 |
| 5243 | 4283 | 8 | 0 | 10.75350738 | 6.950672859 | 75.25038248 |
| 5244 | 4284 | 8 | 0 | 8.107700279 | 5.213004642 | 75.25038248 |
| 5245 | 4285 | 8 | 0 | 1.32290119  | 5.213004642 | 75.25038248 |
| 5246 | 4286 | 8 | 0 | 26.96889408 | 6.081838745 | 73.83368394 |
| 5247 | 4287 | 8 | 0 | 20.18411357 | 6.081838745 | 73.83368394 |
| 5248 | 4288 | 8 | 0 | 17.53829232 | 6.950672859 | 75.25038248 |
| 5249 | 4289 | 8 | 0 | 24.89940959 | 6.950672859 | 75.25038248 |
| 5250 | 4290 | 8 | 0 | 22.25360249 | 5.213004642 | 75.25038248 |
| 5251 | 4291 | 8 | 0 | 15.4688034  | 5.213004642 | 75.25038248 |
| 5252 | 4292 | 8 | 0 | 12.82299629 | 6.081838745 | 73.83368394 |
| 5253 | 4293 | 8 | 0 | 6.038211359 | 8.688341064 | 75.25038248 |
| 5254 | 4294 | 8 | 0 | 3.392390108 | 9.557175178 | 76.66708102 |



|      |      |   |   |             |             |             |
|------|------|---|---|-------------|-------------|-------------|
| 5255 | 4295 | 8 | 0 | 10.75350738 | 9.557175178 | 76.66708102 |
| 5256 | 4296 | 8 | 0 | 8.107700279 | 7.819506962 | 76.66708102 |
| 5257 | 4297 | 8 | 0 | 1.32290119  | 7.819506962 | 76.66708102 |
| 5258 | 4298 | 8 | 0 | 26.96889408 | 8.688341064 | 75.25038248 |
| 5259 | 4299 | 8 | 0 | 20.18411357 | 8.688341064 | 75.25038248 |
| 5260 | 4300 | 8 | 0 | 17.53829232 | 9.557175178 | 76.66708102 |
| 5261 | 4301 | 8 | 0 | 24.89940959 | 9.557175178 | 76.66708102 |
| 5262 | 4302 | 8 | 0 | 22.25360249 | 7.819506962 | 76.66708102 |
| 5263 | 4303 | 8 | 0 | 15.4688034  | 7.819506962 | 76.66708102 |
| 5264 | 4304 | 8 | 0 | 12.82299629 | 8.688341064 | 75.25038248 |
| 5265 | 4305 | 8 | 0 | 6.038211359 | 11.29484338 | 76.66708102 |
| 5266 | 4306 | 8 | 0 | 3.392390108 | 12.1636775  | 78.08377956 |
| 5267 | 4307 | 8 | 0 | 10.75350738 | 12.1636775  | 78.08377956 |
| 5268 | 4308 | 8 | 0 | 8.107700279 | 10.42600928 | 78.08377956 |
| 5269 | 4309 | 8 | 0 | 1.32290119  | 10.42600928 | 78.08377956 |
| 5270 | 4310 | 8 | 0 | 26.96889408 | 11.29484338 | 76.66708102 |
| 5271 | 4311 | 8 | 0 | 20.18411357 | 11.29484338 | 76.66708102 |
| 5272 | 4312 | 8 | 0 | 17.53829232 | 12.1636775  | 78.08377956 |
| 5273 | 4313 | 8 | 0 | 24.89940959 | 12.1636775  | 78.08377956 |
| 5274 | 4314 | 8 | 0 | 22.25360249 | 10.42600928 | 78.08377956 |
| 5275 | 4315 | 8 | 0 | 15.4688034  | 10.42600928 | 78.08377956 |
| 5276 | 4316 | 8 | 0 | 12.82299629 | 11.29484338 | 76.66708102 |
| 5277 | 4317 | 8 | 0 | 6.038211359 | 13.9013457  | 78.08377956 |
| 5278 | 4318 | 8 | 0 | 3.392390108 | 14.77017982 | 79.5004781  |
| 5279 | 4319 | 8 | 0 | 10.75350738 | 14.77017982 | 79.5004781  |
| 5280 | 4320 | 8 | 0 | 8.107700279 | 13.0325116  | 79.5004781  |
| 5281 | 4321 | 8 | 0 | 1.32290119  | 13.0325116  | 79.5004781  |
| 5282 | 4322 | 8 | 0 | 26.96889408 | 13.9013457  | 78.08377956 |
| 5283 | 4323 | 8 | 0 | 20.18411357 | 13.9013457  | 78.08377956 |
| 5284 | 4324 | 8 | 0 | 17.53829232 | 14.77017982 | 79.5004781  |
| 5285 | 4325 | 8 | 0 | 24.89940959 | 14.77017982 | 79.5004781  |
| 5286 | 4326 | 8 | 0 | 22.25360249 | 13.0325116  | 79.5004781  |
| 5287 | 4327 | 8 | 0 | 15.4688034  | 13.0325116  | 79.5004781  |
| 5288 | 4328 | 8 | 0 | 12.82299629 | 13.9013457  | 78.08377956 |
| 5289 | 4329 | 8 | 0 | 6.038211359 | 16.50784802 | 79.5004781  |
| 5290 | 4330 | 8 | 0 | 3.392390108 | 17.37668214 | 80.91717664 |
| 5291 | 4331 | 8 | 0 | 10.75350738 | 17.37668214 | 80.91717664 |
| 5292 | 4332 | 8 | 0 | 8.107700279 | 15.63901392 | 80.91717664 |
| 5293 | 4333 | 8 | 0 | 1.32290119  | 15.63901392 | 80.91717664 |
| 5294 | 4334 | 8 | 0 | 26.96889408 | 16.50784802 | 79.5004781  |
| 5295 | 4335 | 8 | 0 | 20.18411357 | 16.50784802 | 79.5004781  |
| 5296 | 4336 | 8 | 0 | 17.53829232 | 17.37668214 | 80.91717664 |
| 5297 | 4337 | 8 | 0 | 24.89940959 | 17.37668214 | 80.91717664 |
| 5298 | 4338 | 8 | 0 | 22.25360249 | 15.63901392 | 80.91717664 |
| 5299 | 4339 | 8 | 0 | 15.4688034  | 15.63901392 | 80.91717664 |
| 5300 | 4340 | 8 | 0 | 12.82299629 | 16.50784802 | 79.5004781  |
| 5301 | 4341 | 8 | 0 | 6.038211359 | 19.11435034 | 80.91717664 |
| 5302 | 4342 | 8 | 0 | 3.392390108 | 19.98318446 | 82.33387518 |
| 5303 | 4343 | 8 | 0 | 10.75350738 | 19.98318446 | 82.33387518 |
| 5304 | 4344 | 8 | 0 | 8.107700279 | 18.24551624 | 82.33387518 |
| 5305 | 4345 | 8 | 0 | 1.32290119  | 18.24551624 | 82.33387518 |

|      |      |   |   |             |             |             |
|------|------|---|---|-------------|-------------|-------------|
| 5306 | 4346 | 8 | 0 | 26.96889408 | 19.11435034 | 80.91717664 |
| 5307 | 4347 | 8 | 0 | 20.18411357 | 19.11435034 | 80.91717664 |
| 5308 | 4348 | 8 | 0 | 17.53829232 | 19.98318446 | 82.33387518 |
| 5309 | 4349 | 8 | 0 | 24.89940959 | 19.98318446 | 82.33387518 |
| 5310 | 4350 | 8 | 0 | 22.25360249 | 18.24551624 | 82.33387518 |
| 5311 | 4351 | 8 | 0 | 15.4688034  | 18.24551624 | 82.33387518 |
| 5312 | 4352 | 8 | 0 | 12.82299629 | 19.11435034 | 80.91717664 |
| 5313 | 4353 | 8 | 0 | 6.038211359 | 21.72085266 | 82.33387518 |
| 5314 | 4354 | 8 | 0 | 3.392390108 | 22.58968677 | 83.75057372 |
| 5315 | 4355 | 8 | 0 | 10.75350738 | 22.58968677 | 83.75057372 |
| 5316 | 4356 | 8 | 0 | 8.107700279 | 20.85201856 | 83.75057372 |
| 5317 | 4357 | 8 | 0 | 1.32290119  | 20.85201856 | 83.75057372 |
| 5318 | 4358 | 8 | 0 | 26.96889408 | 21.72085266 | 82.33387518 |
| 5319 | 4359 | 8 | 0 | 20.18411357 | 21.72085266 | 82.33387518 |
| 5320 | 4360 | 8 | 0 | 17.53829232 | 22.58968677 | 83.75057372 |
| 5321 | 4361 | 8 | 0 | 24.89940959 | 22.58968677 | 83.75057372 |
| 5322 | 4362 | 8 | 0 | 22.25360249 | 20.85201856 | 83.75057372 |
| 5323 | 4363 | 8 | 0 | 15.4688034  | 20.85201856 | 83.75057372 |
| 5324 | 4364 | 8 | 0 | 12.82299629 | 21.72085266 | 82.33387518 |
| 5325 | 4365 | 8 | 0 | 6.038211359 | 24.32735498 | 83.75057372 |
| 5326 | 4366 | 8 | 0 | 3.392390108 | 25.19618909 | 85.16727226 |
| 5327 | 4367 | 8 | 0 | 10.75350738 | 25.19618909 | 85.16727226 |
| 5328 | 4368 | 8 | 0 | 8.107700279 | 23.45852088 | 85.16727226 |
| 5329 | 4369 | 8 | 0 | 1.32290119  | 23.45852088 | 85.16727226 |
| 5330 | 4370 | 8 | 0 | 26.96889408 | 24.32735498 | 83.75057372 |
| 5331 | 4371 | 8 | 0 | 20.18411357 | 24.32735498 | 83.75057372 |
| 5332 | 4372 | 8 | 0 | 17.53829232 | 25.19618909 | 85.16727226 |
| 5333 | 4373 | 8 | 0 | 24.89940959 | 25.19618909 | 85.16727226 |
| 5334 | 4374 | 8 | 0 | 22.25360249 | 23.45852088 | 85.16727226 |
| 5335 | 4375 | 8 | 0 | 15.4688034  | 23.45852088 | 85.16727226 |
| 5336 | 4376 | 8 | 0 | 12.82299629 | 24.32735498 | 83.75057372 |
| 5337 | 4377 | 8 | 0 | 6.038211359 | 26.9338573  | 85.16727226 |
| 5338 | 4378 | 8 | 0 | 3.392390108 | 27.80269141 | 86.5839708  |
| 5339 | 4379 | 8 | 0 | 10.75350738 | 27.80269141 | 86.5839708  |
| 5340 | 4380 | 8 | 0 | 8.107700279 | 26.0650232  | 86.5839708  |
| 5341 | 4381 | 8 | 0 | 1.32290119  | 26.0650232  | 86.5839708  |
| 5342 | 4382 | 8 | 0 | 26.96889408 | 26.9338573  | 85.16727226 |
| 5343 | 4383 | 8 | 0 | 20.18411357 | 26.9338573  | 85.16727226 |
| 5344 | 4384 | 8 | 0 | 17.53829232 | 27.80269141 | 86.5839708  |
| 5345 | 4385 | 8 | 0 | 24.89940959 | 27.80269141 | 86.5839708  |
| 5346 | 4386 | 8 | 0 | 22.25360249 | 26.0650232  | 86.5839708  |
| 5347 | 4387 | 8 | 0 | 15.4688034  | 26.0650232  | 86.5839708  |
| 5348 | 4388 | 8 | 0 | 12.82299629 | 26.9338573  | 85.16727226 |
| 5349 | 4389 | 8 | 0 | 6.038211359 | 29.54035962 | 86.5839708  |
| 5350 | 4390 | 8 | 0 | 26.96889408 | 29.54035962 | 86.5839708  |
| 5351 | 4391 | 8 | 0 | 20.18411357 | 29.54035962 | 86.5839708  |
| 5352 | 4392 | 8 | 0 | 12.82299629 | 29.54035962 | 86.5839708  |
| 5353 | 4393 | 8 | 0 | 6.038211359 | 0.86883411  | 68.16688978 |
| 5354 | 4394 | 8 | 0 | 3.392390108 | 1.73766822  | 69.58358832 |
| 5355 | 4395 | 8 | 0 | 10.75350738 | 1.73766822  | 69.58358832 |
| 5356 | 4396 | 8 | 0 | 8.107700279 | 0           | 69.58358832 |

|      |      |   |   |             |             |             |
|------|------|---|---|-------------|-------------|-------------|
| 5357 | 4397 | 8 | 0 | 1.32290119  | 0           | 69.58358832 |
| 5358 | 4398 | 8 | 0 | 26.96889408 | 0.86883411  | 68.16688978 |
| 5359 | 4399 | 8 | 0 | 20.18411357 | 0.86883411  | 68.16688978 |
| 5360 | 4400 | 8 | 0 | 17.53829232 | 1.73766822  | 69.58358832 |
| 5361 | 4401 | 8 | 0 | 24.89940959 | 1.73766822  | 69.58358832 |
| 5362 | 4402 | 8 | 0 | 22.25360249 | 0           | 69.58358832 |
| 5363 | 4403 | 8 | 0 | 15.4688034  | 0           | 69.58358832 |
| 5364 | 4404 | 8 | 0 | 12.82299629 | 0.86883411  | 68.16688978 |
| 5365 | 4405 | 8 | 0 | 6.038211359 | 3.475336426 | 69.58358832 |
| 5366 | 4406 | 8 | 0 | 3.392390108 | 4.34417054  | 71.00028686 |
| 5367 | 4407 | 8 | 0 | 10.75350738 | 4.34417054  | 71.00028686 |
| 5368 | 4408 | 8 | 0 | 8.107700279 | 2.60650232  | 71.00028686 |
| 5369 | 4409 | 8 | 0 | 1.32290119  | 2.60650232  | 71.00028686 |
| 5370 | 4410 | 8 | 0 | 26.96889408 | 3.475336426 | 69.58358832 |
| 5371 | 4411 | 8 | 0 | 20.18411357 | 3.475336426 | 69.58358832 |
| 5372 | 4412 | 8 | 0 | 17.53829232 | 4.34417054  | 71.00028686 |
| 5373 | 4413 | 8 | 0 | 24.89940959 | 4.34417054  | 71.00028686 |
| 5374 | 4414 | 8 | 0 | 22.25360249 | 2.60650232  | 71.00028686 |
| 5375 | 4415 | 8 | 0 | 15.4688034  | 2.60650232  | 71.00028686 |
| 5376 | 4416 | 8 | 0 | 12.82299629 | 3.475336426 | 69.58358832 |
| 5377 | 4417 | 8 | 0 | 6.038211359 | 6.081838745 | 71.00028686 |
| 5378 | 4418 | 8 | 0 | 3.392390108 | 6.950672859 | 72.4169854  |
| 5379 | 4419 | 8 | 0 | 10.75350738 | 6.950672859 | 72.4169854  |
| 5380 | 4420 | 8 | 0 | 8.107700279 | 5.213004642 | 72.4169854  |
| 5381 | 4421 | 8 | 0 | 1.32290119  | 5.213004642 | 72.4169854  |
| 5382 | 4422 | 8 | 0 | 26.96889408 | 6.081838745 | 71.00028686 |
| 5383 | 4423 | 8 | 0 | 20.18411357 | 6.081838745 | 71.00028686 |
| 5384 | 4424 | 8 | 0 | 17.53829232 | 6.950672859 | 72.4169854  |
| 5385 | 4425 | 8 | 0 | 24.89940959 | 6.950672859 | 72.4169854  |
| 5386 | 4426 | 8 | 0 | 22.25360249 | 5.213004642 | 72.4169854  |
| 5387 | 4427 | 8 | 0 | 15.4688034  | 5.213004642 | 72.4169854  |
| 5388 | 4428 | 8 | 0 | 12.82299629 | 6.081838745 | 71.00028686 |
| 5389 | 4429 | 8 | 0 | 6.038211359 | 8.688341064 | 72.4169854  |
| 5390 | 4430 | 8 | 0 | 3.392390108 | 9.557175178 | 73.83368394 |
| 5391 | 4431 | 8 | 0 | 10.75350738 | 9.557175178 | 73.83368394 |
| 5392 | 4432 | 8 | 0 | 8.107700279 | 7.819506962 | 73.83368394 |
| 5393 | 4433 | 8 | 0 | 1.32290119  | 7.819506962 | 73.83368394 |
| 5394 | 4434 | 8 | 0 | 26.96889408 | 8.688341064 | 72.4169854  |
| 5395 | 4435 | 8 | 0 | 20.18411357 | 8.688341064 | 72.4169854  |
| 5396 | 4436 | 8 | 0 | 17.53829232 | 9.557175178 | 73.83368394 |
| 5397 | 4437 | 8 | 0 | 24.89940959 | 9.557175178 | 73.83368394 |
| 5398 | 4438 | 8 | 0 | 22.25360249 | 7.819506962 | 73.83368394 |
| 5399 | 4439 | 8 | 0 | 15.4688034  | 7.819506962 | 73.83368394 |
| 5400 | 4440 | 8 | 0 | 12.82299629 | 8.688341064 | 72.4169854  |
| 5401 | 4441 | 8 | 0 | 6.038211359 | 11.29484338 | 73.83368394 |
| 5402 | 4442 | 8 | 0 | 3.392390108 | 12.1636775  | 75.25038248 |
| 5403 | 4443 | 8 | 0 | 10.75350738 | 12.1636775  | 75.25038248 |
| 5404 | 4444 | 8 | 0 | 8.107700279 | 10.42600928 | 75.25038248 |
| 5405 | 4445 | 8 | 0 | 1.32290119  | 10.42600928 | 75.25038248 |
| 5406 | 4446 | 8 | 0 | 26.96889408 | 11.29484338 | 73.83368394 |
| 5407 | 4447 | 8 | 0 | 20.18411357 | 11.29484338 | 73.83368394 |

|      |      |   |   |             |             |             |
|------|------|---|---|-------------|-------------|-------------|
| 5408 | 4448 | 8 | 0 | 17.53829232 | 12.1636775  | 75.25038248 |
| 5409 | 4449 | 8 | 0 | 24.89940959 | 12.1636775  | 75.25038248 |
| 5410 | 4450 | 8 | 0 | 22.25360249 | 10.42600928 | 75.25038248 |
| 5411 | 4451 | 8 | 0 | 15.4688034  | 10.42600928 | 75.25038248 |
| 5412 | 4452 | 8 | 0 | 12.82299629 | 11.29484338 | 73.83368394 |
| 5413 | 4453 | 8 | 0 | 6.038211359 | 13.9013457  | 75.25038248 |
| 5414 | 4454 | 8 | 0 | 3.392390108 | 14.77017982 | 76.66708102 |
| 5415 | 4455 | 8 | 0 | 10.75350738 | 14.77017982 | 76.66708102 |
| 5416 | 4456 | 8 | 0 | 8.107700279 | 13.0325116  | 76.66708102 |
| 5417 | 4457 | 8 | 0 | 1.32290119  | 13.0325116  | 76.66708102 |
| 5418 | 4458 | 8 | 0 | 26.96889408 | 13.9013457  | 75.25038248 |
| 5419 | 4459 | 8 | 0 | 20.18411357 | 13.9013457  | 75.25038248 |
| 5420 | 4460 | 8 | 0 | 17.53829232 | 14.77017982 | 76.66708102 |
| 5421 | 4461 | 8 | 0 | 24.89940959 | 14.77017982 | 76.66708102 |
| 5422 | 4462 | 8 | 0 | 22.25360249 | 13.0325116  | 76.66708102 |
| 5423 | 4463 | 8 | 0 | 15.4688034  | 13.0325116  | 76.66708102 |
| 5424 | 4464 | 8 | 0 | 12.82299629 | 13.9013457  | 75.25038248 |
| 5425 | 4465 | 8 | 0 | 6.038211359 | 16.50784802 | 76.66708102 |
| 5426 | 4466 | 8 | 0 | 3.392390108 | 17.37668214 | 78.08377956 |
| 5427 | 4467 | 8 | 0 | 10.75350738 | 17.37668214 | 78.08377956 |
| 5428 | 4468 | 8 | 0 | 8.107700279 | 15.63901392 | 78.08377956 |
| 5429 | 4469 | 8 | 0 | 1.32290119  | 15.63901392 | 78.08377956 |
| 5430 | 4470 | 8 | 0 | 26.96889408 | 16.50784802 | 76.66708102 |
| 5431 | 4471 | 8 | 0 | 20.18411357 | 16.50784802 | 76.66708102 |
| 5432 | 4472 | 8 | 0 | 17.53829232 | 17.37668214 | 78.08377956 |
| 5433 | 4473 | 8 | 0 | 24.89940959 | 17.37668214 | 78.08377956 |
| 5434 | 4474 | 8 | 0 | 22.25360249 | 15.63901392 | 78.08377956 |
| 5435 | 4475 | 8 | 0 | 15.4688034  | 15.63901392 | 78.08377956 |
| 5436 | 4476 | 8 | 0 | 12.82299629 | 16.50784802 | 76.66708102 |
| 5437 | 4477 | 8 | 0 | 6.038211359 | 19.11435034 | 78.08377956 |
| 5438 | 4478 | 8 | 0 | 3.392390108 | 19.98318446 | 79.5004781  |
| 5439 | 4479 | 8 | 0 | 10.75350738 | 19.98318446 | 79.5004781  |
| 5440 | 4480 | 8 | 0 | 8.107700279 | 18.24551624 | 79.5004781  |
| 5441 | 4481 | 8 | 0 | 1.32290119  | 18.24551624 | 79.5004781  |
| 5442 | 4482 | 8 | 0 | 26.96889408 | 19.11435034 | 78.08377956 |
| 5443 | 4483 | 8 | 0 | 20.18411357 | 19.11435034 | 78.08377956 |
| 5444 | 4484 | 8 | 0 | 17.53829232 | 19.98318446 | 79.5004781  |
| 5445 | 4485 | 8 | 0 | 24.89940959 | 19.98318446 | 79.5004781  |
| 5446 | 4486 | 8 | 0 | 22.25360249 | 18.24551624 | 79.5004781  |
| 5447 | 4487 | 8 | 0 | 15.4688034  | 18.24551624 | 79.5004781  |
| 5448 | 4488 | 8 | 0 | 12.82299629 | 19.11435034 | 78.08377956 |
| 5449 | 4489 | 8 | 0 | 6.038211359 | 21.72085266 | 79.5004781  |
| 5450 | 4490 | 8 | 0 | 3.392390108 | 22.58968677 | 80.91717664 |
| 5451 | 4491 | 8 | 0 | 10.75350738 | 22.58968677 | 80.91717664 |
| 5452 | 4492 | 8 | 0 | 8.107700279 | 20.85201856 | 80.91717664 |
| 5453 | 4493 | 8 | 0 | 1.32290119  | 20.85201856 | 80.91717664 |
| 5454 | 4494 | 8 | 0 | 26.96889408 | 21.72085266 | 79.5004781  |
| 5455 | 4495 | 8 | 0 | 20.18411357 | 21.72085266 | 79.5004781  |
| 5456 | 4496 | 8 | 0 | 17.53829232 | 22.58968677 | 80.91717664 |
| 5457 | 4497 | 8 | 0 | 24.89940959 | 22.58968677 | 80.91717664 |
| 5458 | 4498 | 8 | 0 | 22.25360249 | 20.85201856 | 80.91717664 |

|      |      |   |   |             |             |             |
|------|------|---|---|-------------|-------------|-------------|
| 5459 | 4499 | 8 | 0 | 15.4688034  | 20.85201856 | 80.91717664 |
| 5460 | 4500 | 8 | 0 | 12.82299629 | 21.72085266 | 79.5004781  |
| 5461 | 4501 | 8 | 0 | 6.038211359 | 24.32735498 | 80.91717664 |
| 5462 | 4502 | 8 | 0 | 3.392390108 | 25.19618909 | 82.33387518 |
| 5463 | 4503 | 8 | 0 | 10.75350738 | 25.19618909 | 82.33387518 |
| 5464 | 4504 | 8 | 0 | 8.107700279 | 23.45852088 | 82.33387518 |
| 5465 | 4505 | 8 | 0 | 1.32290119  | 23.45852088 | 82.33387518 |
| 5466 | 4506 | 8 | 0 | 26.96889408 | 24.32735498 | 80.91717664 |
| 5467 | 4507 | 8 | 0 | 20.18411357 | 24.32735498 | 80.91717664 |
| 5468 | 4508 | 8 | 0 | 17.53829232 | 25.19618909 | 82.33387518 |
| 5469 | 4509 | 8 | 0 | 24.89940959 | 25.19618909 | 82.33387518 |
| 5470 | 4510 | 8 | 0 | 22.25360249 | 23.45852088 | 82.33387518 |
| 5471 | 4511 | 8 | 0 | 15.4688034  | 23.45852088 | 82.33387518 |
| 5472 | 4512 | 8 | 0 | 12.82299629 | 24.32735498 | 80.91717664 |
| 5473 | 4513 | 8 | 0 | 6.038211359 | 26.9338573  | 82.33387518 |
| 5474 | 4514 | 8 | 0 | 3.392390108 | 27.80269141 | 83.75057372 |
| 5475 | 4515 | 8 | 0 | 10.75350738 | 27.80269141 | 83.75057372 |
| 5476 | 4516 | 8 | 0 | 8.107700279 | 26.0650232  | 83.75057372 |
| 5477 | 4517 | 8 | 0 | 1.32290119  | 26.0650232  | 83.75057372 |
| 5478 | 4518 | 8 | 0 | 26.96889408 | 26.9338573  | 82.33387518 |
| 5479 | 4519 | 8 | 0 | 20.18411357 | 26.9338573  | 82.33387518 |
| 5480 | 4520 | 8 | 0 | 17.53829232 | 27.80269141 | 83.75057372 |
| 5481 | 4521 | 8 | 0 | 24.89940959 | 27.80269141 | 83.75057372 |
| 5482 | 4522 | 8 | 0 | 22.25360249 | 26.0650232  | 83.75057372 |
| 5483 | 4523 | 8 | 0 | 15.4688034  | 26.0650232  | 83.75057372 |
| 5484 | 4524 | 8 | 0 | 12.82299629 | 26.9338573  | 82.33387518 |
| 5485 | 4525 | 8 | 0 | 6.038211359 | 29.54035962 | 83.75057372 |
| 5486 | 4526 | 8 | 0 | 3.392390108 | 30.40919373 | 85.16727226 |
| 5487 | 4527 | 8 | 0 | 10.75350738 | 30.40919373 | 85.16727226 |
| 5488 | 4528 | 8 | 0 | 8.107700279 | 28.67152552 | 85.16727226 |
| 5489 | 4529 | 8 | 0 | 1.32290119  | 28.67152552 | 85.16727226 |
| 5490 | 4530 | 8 | 0 | 26.96889408 | 29.54035962 | 83.75057372 |
| 5491 | 4531 | 8 | 0 | 20.18411357 | 29.54035962 | 83.75057372 |
| 5492 | 4532 | 8 | 0 | 17.53829232 | 30.40919373 | 85.16727226 |
| 5493 | 4533 | 8 | 0 | 24.89940959 | 30.40919373 | 85.16727226 |
| 5494 | 4534 | 8 | 0 | 22.25360249 | 28.67152552 | 85.16727226 |
| 5495 | 4535 | 8 | 0 | 15.4688034  | 28.67152552 | 85.16727226 |
| 5496 | 4536 | 8 | 0 | 12.82299629 | 29.54035962 | 83.75057372 |
| 5497 | 4537 | 8 | 0 | 6.038211359 | 0.86883411  | 65.3334927  |
| 5498 | 4538 | 8 | 0 | 3.392390108 | 1.73766822  | 66.75019124 |
| 5499 | 4539 | 8 | 0 | 10.75350738 | 1.73766822  | 66.75019124 |
| 5500 | 4540 | 8 | 0 | 8.107700279 | 0           | 66.75019124 |
| 5501 | 4541 | 8 | 0 | 1.32290119  | 0           | 66.75019124 |
| 5502 | 4542 | 8 | 0 | 26.96889408 | 0.86883411  | 65.3334927  |
| 5503 | 4543 | 8 | 0 | 20.18411357 | 0.86883411  | 65.3334927  |
| 5504 | 4544 | 8 | 0 | 17.53829232 | 1.73766822  | 66.75019124 |
| 5505 | 4545 | 8 | 0 | 24.89940959 | 1.73766822  | 66.75019124 |
| 5506 | 4546 | 8 | 0 | 22.25360249 | 0           | 66.75019124 |
| 5507 | 4547 | 8 | 0 | 15.4688034  | 0           | 66.75019124 |
| 5508 | 4548 | 8 | 0 | 12.82299629 | 0.86883411  | 65.3334927  |
| 5509 | 4549 | 8 | 0 | 6.038211359 | 3.475336426 | 66.75019124 |

|      |      |   |   |             |             |             |
|------|------|---|---|-------------|-------------|-------------|
| 5510 | 4550 | 8 | 0 | 3.392390108 | 4.34417054  | 68.16688978 |
| 5511 | 4551 | 8 | 0 | 10.75350738 | 4.34417054  | 68.16688978 |
| 5512 | 4552 | 8 | 0 | 8.107700279 | 2.60650232  | 68.16688978 |
| 5513 | 4553 | 8 | 0 | 1.32290119  | 2.60650232  | 68.16688978 |
| 5514 | 4554 | 8 | 0 | 26.96889408 | 3.475336426 | 66.75019124 |
| 5515 | 4555 | 8 | 0 | 20.18411357 | 3.475336426 | 66.75019124 |
| 5516 | 4556 | 8 | 0 | 17.53829232 | 4.34417054  | 68.16688978 |
| 5517 | 4557 | 8 | 0 | 24.89940959 | 4.34417054  | 68.16688978 |
| 5518 | 4558 | 8 | 0 | 22.25360249 | 2.60650232  | 68.16688978 |
| 5519 | 4559 | 8 | 0 | 15.4688034  | 2.60650232  | 68.16688978 |
| 5520 | 4560 | 8 | 0 | 12.82299629 | 3.475336426 | 66.75019124 |
| 5521 | 4561 | 8 | 0 | 6.038211359 | 6.081838745 | 68.16688978 |
| 5522 | 4562 | 8 | 0 | 3.392390108 | 6.950672859 | 69.58358832 |
| 5523 | 4563 | 8 | 0 | 10.75350738 | 6.950672859 | 69.58358832 |
| 5524 | 4564 | 8 | 0 | 8.107700279 | 5.213004642 | 69.58358832 |
| 5525 | 4565 | 8 | 0 | 1.32290119  | 5.213004642 | 69.58358832 |
| 5526 | 4566 | 8 | 0 | 26.96889408 | 6.081838745 | 68.16688978 |
| 5527 | 4567 | 8 | 0 | 20.18411357 | 6.081838745 | 68.16688978 |
| 5528 | 4568 | 8 | 0 | 17.53829232 | 6.950672859 | 69.58358832 |
| 5529 | 4569 | 8 | 0 | 24.89940959 | 6.950672859 | 69.58358832 |
| 5530 | 4570 | 8 | 0 | 22.25360249 | 5.213004642 | 69.58358832 |
| 5531 | 4571 | 8 | 0 | 15.4688034  | 5.213004642 | 69.58358832 |
| 5532 | 4572 | 8 | 0 | 12.82299629 | 6.081838745 | 68.16688978 |
| 5533 | 4573 | 8 | 0 | 6.038211359 | 8.688341064 | 69.58358832 |
| 5534 | 4574 | 8 | 0 | 3.392390108 | 9.557175178 | 71.00028686 |
| 5535 | 4575 | 8 | 0 | 10.75350738 | 9.557175178 | 71.00028686 |
| 5536 | 4576 | 8 | 0 | 8.107700279 | 7.819506962 | 71.00028686 |
| 5537 | 4577 | 8 | 0 | 1.32290119  | 7.819506962 | 71.00028686 |
| 5538 | 4578 | 8 | 0 | 26.96889408 | 8.688341064 | 69.58358832 |
| 5539 | 4579 | 8 | 0 | 20.18411357 | 8.688341064 | 69.58358832 |
| 5540 | 4580 | 8 | 0 | 17.53829232 | 9.557175178 | 71.00028686 |
| 5541 | 4581 | 8 | 0 | 24.89940959 | 9.557175178 | 71.00028686 |
| 5542 | 4582 | 8 | 0 | 22.25360249 | 7.819506962 | 71.00028686 |
| 5543 | 4583 | 8 | 0 | 15.4688034  | 7.819506962 | 71.00028686 |
| 5544 | 4584 | 8 | 0 | 12.82299629 | 8.688341064 | 69.58358832 |
| 5545 | 4585 | 8 | 0 | 6.038211359 | 11.29484338 | 71.00028686 |
| 5546 | 4586 | 8 | 0 | 3.392390108 | 12.1636775  | 72.4169854  |
| 5547 | 4587 | 8 | 0 | 10.75350738 | 12.1636775  | 72.4169854  |
| 5548 | 4588 | 8 | 0 | 8.107700279 | 10.42600928 | 72.4169854  |
| 5549 | 4589 | 8 | 0 | 1.32290119  | 10.42600928 | 72.4169854  |
| 5550 | 4590 | 8 | 0 | 26.96889408 | 11.29484338 | 71.00028686 |
| 5551 | 4591 | 8 | 0 | 20.18411357 | 11.29484338 | 71.00028686 |
| 5552 | 4592 | 8 | 0 | 17.53829232 | 12.1636775  | 72.4169854  |
| 5553 | 4593 | 8 | 0 | 24.89940959 | 12.1636775  | 72.4169854  |
| 5554 | 4594 | 8 | 0 | 22.25360249 | 10.42600928 | 72.4169854  |
| 5555 | 4595 | 8 | 0 | 15.4688034  | 10.42600928 | 72.4169854  |
| 5556 | 4596 | 8 | 0 | 12.82299629 | 11.29484338 | 71.00028686 |
| 5557 | 4597 | 8 | 0 | 6.038211359 | 13.9013457  | 72.4169854  |
| 5558 | 4598 | 8 | 0 | 3.392390108 | 14.77017982 | 73.83368394 |
| 5559 | 4599 | 8 | 0 | 10.75350738 | 14.77017982 | 73.83368394 |
| 5560 | 4600 | 8 | 0 | 8.107700279 | 13.0325116  | 73.83368394 |

|      |      |   |   |             |             |             |
|------|------|---|---|-------------|-------------|-------------|
| 5561 | 4601 | 8 | 0 | 1.32290119  | 13.0325116  | 73.83368394 |
| 5562 | 4602 | 8 | 0 | 26.96889408 | 13.9013457  | 72.4169854  |
| 5563 | 4603 | 8 | 0 | 20.18411357 | 13.9013457  | 72.4169854  |
| 5564 | 4604 | 8 | 0 | 17.53829232 | 14.77017982 | 73.83368394 |
| 5565 | 4605 | 8 | 0 | 24.89940959 | 14.77017982 | 73.83368394 |
| 5566 | 4606 | 8 | 0 | 22.25360249 | 13.0325116  | 73.83368394 |
| 5567 | 4607 | 8 | 0 | 15.4688034  | 13.0325116  | 73.83368394 |
| 5568 | 4608 | 8 | 0 | 12.82299629 | 13.9013457  | 72.4169854  |
| 5569 | 4609 | 8 | 0 | 6.038211359 | 16.50784802 | 73.83368394 |
| 5570 | 4610 | 8 | 0 | 3.392390108 | 17.37668214 | 75.25038248 |
| 5571 | 4611 | 8 | 0 | 10.75350738 | 17.37668214 | 75.25038248 |
| 5572 | 4612 | 8 | 0 | 8.107700279 | 15.63901392 | 75.25038248 |
| 5573 | 4613 | 8 | 0 | 1.32290119  | 15.63901392 | 75.25038248 |
| 5574 | 4614 | 8 | 0 | 26.96889408 | 16.50784802 | 73.83368394 |
| 5575 | 4615 | 8 | 0 | 20.18411357 | 16.50784802 | 73.83368394 |
| 5576 | 4616 | 8 | 0 | 17.53829232 | 17.37668214 | 75.25038248 |
| 5577 | 4617 | 8 | 0 | 24.89940959 | 17.37668214 | 75.25038248 |
| 5578 | 4618 | 8 | 0 | 22.25360249 | 15.63901392 | 75.25038248 |
| 5579 | 4619 | 8 | 0 | 15.4688034  | 15.63901392 | 75.25038248 |
| 5580 | 4620 | 8 | 0 | 12.82299629 | 16.50784802 | 73.83368394 |
| 5581 | 4621 | 8 | 0 | 6.038211359 | 19.11435034 | 75.25038248 |
| 5582 | 4622 | 8 | 0 | 3.392390108 | 19.98318446 | 76.66708102 |
| 5583 | 4623 | 8 | 0 | 10.75350738 | 19.98318446 | 76.66708102 |
| 5584 | 4624 | 8 | 0 | 8.107700279 | 18.24551624 | 76.66708102 |
| 5585 | 4625 | 8 | 0 | 1.32290119  | 18.24551624 | 76.66708102 |
| 5586 | 4626 | 8 | 0 | 26.96889408 | 19.11435034 | 75.25038248 |
| 5587 | 4627 | 8 | 0 | 20.18411357 | 19.11435034 | 75.25038248 |
| 5588 | 4628 | 8 | 0 | 17.53829232 | 19.98318446 | 76.66708102 |
| 5589 | 4629 | 8 | 0 | 24.89940959 | 19.98318446 | 76.66708102 |
| 5590 | 4630 | 8 | 0 | 22.25360249 | 18.24551624 | 76.66708102 |
| 5591 | 4631 | 8 | 0 | 15.4688034  | 18.24551624 | 76.66708102 |
| 5592 | 4632 | 8 | 0 | 12.82299629 | 19.11435034 | 75.25038248 |
| 5593 | 4633 | 8 | 0 | 6.038211359 | 21.72085266 | 76.66708102 |
| 5594 | 4634 | 8 | 0 | 3.392390108 | 22.58968677 | 78.08377956 |
| 5595 | 4635 | 8 | 0 | 10.75350738 | 22.58968677 | 78.08377956 |
| 5596 | 4636 | 8 | 0 | 8.107700279 | 20.85201856 | 78.08377956 |
| 5597 | 4637 | 8 | 0 | 1.32290119  | 20.85201856 | 78.08377956 |
| 5598 | 4638 | 8 | 0 | 26.96889408 | 21.72085266 | 76.66708102 |
| 5599 | 4639 | 8 | 0 | 20.18411357 | 21.72085266 | 76.66708102 |
| 5600 | 4640 | 8 | 0 | 17.53829232 | 22.58968677 | 78.08377956 |
| 5601 | 4641 | 8 | 0 | 24.89940959 | 22.58968677 | 78.08377956 |
| 5602 | 4642 | 8 | 0 | 22.25360249 | 20.85201856 | 78.08377956 |
| 5603 | 4643 | 8 | 0 | 15.4688034  | 20.85201856 | 78.08377956 |
| 5604 | 4644 | 8 | 0 | 12.82299629 | 21.72085266 | 76.66708102 |
| 5605 | 4645 | 8 | 0 | 6.038211359 | 24.32735498 | 78.08377956 |
| 5606 | 4646 | 8 | 0 | 3.392390108 | 25.19618909 | 79.5004781  |
| 5607 | 4647 | 8 | 0 | 10.75350738 | 25.19618909 | 79.5004781  |
| 5608 | 4648 | 8 | 0 | 8.107700279 | 23.45852088 | 79.5004781  |
| 5609 | 4649 | 8 | 0 | 1.32290119  | 23.45852088 | 79.5004781  |
| 5610 | 4650 | 8 | 0 | 26.96889408 | 24.32735498 | 78.08377956 |
| 5611 | 4651 | 8 | 0 | 20.18411357 | 24.32735498 | 78.08377956 |

|      |      |   |   |             |             |             |
|------|------|---|---|-------------|-------------|-------------|
| 5612 | 4652 | 8 | 0 | 17.53829232 | 25.19618909 | 79.5004781  |
| 5613 | 4653 | 8 | 0 | 24.89940959 | 25.19618909 | 79.5004781  |
| 5614 | 4654 | 8 | 0 | 22.25360249 | 23.45852088 | 79.5004781  |
| 5615 | 4655 | 8 | 0 | 15.4688034  | 23.45852088 | 79.5004781  |
| 5616 | 4656 | 8 | 0 | 12.82299629 | 24.32735498 | 78.08377956 |
| 5617 | 4657 | 8 | 0 | 6.038211359 | 26.9338573  | 79.5004781  |
| 5618 | 4658 | 8 | 0 | 3.392390108 | 27.80269141 | 80.91717664 |
| 5619 | 4659 | 8 | 0 | 10.75350738 | 27.80269141 | 80.91717664 |
| 5620 | 4660 | 8 | 0 | 8.107700279 | 26.0650232  | 80.91717664 |
| 5621 | 4661 | 8 | 0 | 1.32290119  | 26.0650232  | 80.91717664 |
| 5622 | 4662 | 8 | 0 | 26.96889408 | 26.9338573  | 79.5004781  |
| 5623 | 4663 | 8 | 0 | 20.18411357 | 26.9338573  | 79.5004781  |
| 5624 | 4664 | 8 | 0 | 17.53829232 | 27.80269141 | 80.91717664 |
| 5625 | 4665 | 8 | 0 | 24.89940959 | 27.80269141 | 80.91717664 |
| 5626 | 4666 | 8 | 0 | 22.25360249 | 26.0650232  | 80.91717664 |
| 5627 | 4667 | 8 | 0 | 15.4688034  | 26.0650232  | 80.91717664 |
| 5628 | 4668 | 8 | 0 | 12.82299629 | 26.9338573  | 79.5004781  |
| 5629 | 4669 | 8 | 0 | 6.038211359 | 29.54035962 | 80.91717664 |
| 5630 | 4670 | 8 | 0 | 3.392390108 | 30.40919373 | 82.33387518 |
| 5631 | 4671 | 8 | 0 | 10.75350738 | 30.40919373 | 82.33387518 |
| 5632 | 4672 | 8 | 0 | 8.107700279 | 28.67152552 | 82.33387518 |
| 5633 | 4673 | 8 | 0 | 1.32290119  | 28.67152552 | 82.33387518 |
| 5634 | 4674 | 8 | 0 | 26.96889408 | 29.54035962 | 80.91717664 |
| 5635 | 4675 | 8 | 0 | 20.18411357 | 29.54035962 | 80.91717664 |
| 5636 | 4676 | 8 | 0 | 17.53829232 | 30.40919373 | 82.33387518 |
| 5637 | 4677 | 8 | 0 | 24.89940959 | 30.40919373 | 82.33387518 |
| 5638 | 4678 | 8 | 0 | 22.25360249 | 28.67152552 | 82.33387518 |
| 5639 | 4679 | 8 | 0 | 15.4688034  | 28.67152552 | 82.33387518 |
| 5640 | 4680 | 8 | 0 | 12.82299629 | 29.54035962 | 80.91717664 |
| 5641 | 4681 | 8 | 0 | 6.038211359 | 0.86883411  | 62.50009562 |
| 5642 | 4682 | 8 | 0 | 3.392390108 | 1.73766822  | 63.91679416 |
| 5643 | 4683 | 8 | 0 | 10.75350738 | 1.73766822  | 63.91679416 |
| 5644 | 4684 | 8 | 0 | 8.107700279 | 0           | 63.91679416 |
| 5645 | 4685 | 8 | 0 | 1.32290119  | 0           | 63.91679416 |
| 5646 | 4686 | 8 | 0 | 26.96889408 | 0.86883411  | 62.50009562 |
| 5647 | 4687 | 8 | 0 | 20.18411357 | 0.86883411  | 62.50009562 |
| 5648 | 4688 | 8 | 0 | 17.53829232 | 1.73766822  | 63.91679416 |
| 5649 | 4689 | 8 | 0 | 24.89940959 | 1.73766822  | 63.91679416 |
| 5650 | 4690 | 8 | 0 | 22.25360249 | 0           | 63.91679416 |
| 5651 | 4691 | 8 | 0 | 15.4688034  | 0           | 63.91679416 |
| 5652 | 4692 | 8 | 0 | 12.82299629 | 0.86883411  | 62.50009562 |
| 5653 | 4693 | 8 | 0 | 6.038211359 | 3.475336426 | 63.91679416 |
| 5654 | 4694 | 8 | 0 | 3.392390108 | 4.34417054  | 65.3334927  |
| 5655 | 4695 | 8 | 0 | 10.75350738 | 4.34417054  | 65.3334927  |
| 5656 | 4696 | 8 | 0 | 8.107700279 | 2.60650232  | 65.3334927  |
| 5657 | 4697 | 8 | 0 | 1.32290119  | 2.60650232  | 65.3334927  |
| 5658 | 4698 | 8 | 0 | 26.96889408 | 3.475336426 | 63.91679416 |
| 5659 | 4699 | 8 | 0 | 20.18411357 | 3.475336426 | 63.91679416 |
| 5660 | 4700 | 8 | 0 | 17.53829232 | 4.34417054  | 65.3334927  |
| 5661 | 4701 | 8 | 0 | 24.89940959 | 4.34417054  | 65.3334927  |
| 5662 | 4702 | 8 | 0 | 22.25360249 | 2.60650232  | 65.3334927  |



|      |      |   |   |             |             |             |
|------|------|---|---|-------------|-------------|-------------|
| 5663 | 4703 | 8 | 0 | 15.4688034  | 2.60650232  | 65.3334927  |
| 5664 | 4704 | 8 | 0 | 12.82299629 | 3.475336426 | 63.91679416 |
| 5665 | 4705 | 8 | 0 | 6.038211359 | 6.081838745 | 65.3334927  |
| 5666 | 4706 | 8 | 0 | 3.392390108 | 6.950672859 | 66.75019124 |
| 5667 | 4707 | 8 | 0 | 10.75350738 | 6.950672859 | 66.75019124 |
| 5668 | 4708 | 8 | 0 | 8.107700279 | 5.213004642 | 66.75019124 |
| 5669 | 4709 | 8 | 0 | 1.32290119  | 5.213004642 | 66.75019124 |
| 5670 | 4710 | 8 | 0 | 26.96889408 | 6.081838745 | 65.3334927  |
| 5671 | 4711 | 8 | 0 | 20.18411357 | 6.081838745 | 65.3334927  |
| 5672 | 4712 | 8 | 0 | 17.53829232 | 6.950672859 | 66.75019124 |
| 5673 | 4713 | 8 | 0 | 24.89940959 | 6.950672859 | 66.75019124 |
| 5674 | 4714 | 8 | 0 | 22.25360249 | 5.213004642 | 66.75019124 |
| 5675 | 4715 | 8 | 0 | 15.4688034  | 5.213004642 | 66.75019124 |
| 5676 | 4716 | 8 | 0 | 12.82299629 | 6.081838745 | 65.3334927  |
| 5677 | 4717 | 8 | 0 | 6.038211359 | 8.688341064 | 66.75019124 |
| 5678 | 4718 | 8 | 0 | 3.392390108 | 9.557175178 | 68.16688978 |
| 5679 | 4719 | 8 | 0 | 10.75350738 | 9.557175178 | 68.16688978 |
| 5680 | 4720 | 8 | 0 | 8.107700279 | 7.819506962 | 68.16688978 |
| 5681 | 4721 | 8 | 0 | 1.32290119  | 7.819506962 | 68.16688978 |
| 5682 | 4722 | 8 | 0 | 26.96889408 | 8.688341064 | 66.75019124 |
| 5683 | 4723 | 8 | 0 | 20.18411357 | 8.688341064 | 66.75019124 |
| 5684 | 4724 | 8 | 0 | 17.53829232 | 9.557175178 | 68.16688978 |
| 5685 | 4725 | 8 | 0 | 24.89940959 | 9.557175178 | 68.16688978 |
| 5686 | 4726 | 8 | 0 | 22.25360249 | 7.819506962 | 68.16688978 |
| 5687 | 4727 | 8 | 0 | 15.4688034  | 7.819506962 | 68.16688978 |
| 5688 | 4728 | 8 | 0 | 12.82299629 | 8.688341064 | 66.75019124 |
| 5689 | 4729 | 8 | 0 | 6.038211359 | 11.29484338 | 68.16688978 |
| 5690 | 4730 | 8 | 0 | 3.392390108 | 12.1636775  | 69.58358832 |
| 5691 | 4731 | 8 | 0 | 10.75350738 | 12.1636775  | 69.58358832 |
| 5692 | 4732 | 8 | 0 | 8.107700279 | 10.42600928 | 69.58358832 |
| 5693 | 4733 | 8 | 0 | 1.32290119  | 10.42600928 | 69.58358832 |
| 5694 | 4734 | 8 | 0 | 26.96889408 | 11.29484338 | 68.16688978 |
| 5695 | 4735 | 8 | 0 | 20.18411357 | 11.29484338 | 68.16688978 |
| 5696 | 4736 | 8 | 0 | 17.53829232 | 12.1636775  | 69.58358832 |
| 5697 | 4737 | 8 | 0 | 24.89940959 | 12.1636775  | 69.58358832 |
| 5698 | 4738 | 8 | 0 | 22.25360249 | 10.42600928 | 69.58358832 |
| 5699 | 4739 | 8 | 0 | 15.4688034  | 10.42600928 | 69.58358832 |
| 5700 | 4740 | 8 | 0 | 12.82299629 | 11.29484338 | 68.16688978 |
| 5701 | 4741 | 8 | 0 | 6.038211359 | 13.9013457  | 69.58358832 |
| 5702 | 4742 | 8 | 0 | 3.392390108 | 14.77017982 | 71.00028686 |
| 5703 | 4743 | 8 | 0 | 10.75350738 | 14.77017982 | 71.00028686 |
| 5704 | 4744 | 8 | 0 | 8.107700279 | 13.0325116  | 71.00028686 |
| 5705 | 4745 | 8 | 0 | 1.32290119  | 13.0325116  | 71.00028686 |
| 5706 | 4746 | 8 | 0 | 26.96889408 | 13.9013457  | 69.58358832 |
| 5707 | 4747 | 8 | 0 | 20.18411357 | 13.9013457  | 69.58358832 |
| 5708 | 4748 | 8 | 0 | 17.53829232 | 14.77017982 | 71.00028686 |
| 5709 | 4749 | 8 | 0 | 24.89940959 | 14.77017982 | 71.00028686 |
| 5710 | 4750 | 8 | 0 | 22.25360249 | 13.0325116  | 71.00028686 |
| 5711 | 4751 | 8 | 0 | 15.4688034  | 13.0325116  | 71.00028686 |
| 5712 | 4752 | 8 | 0 | 12.82299629 | 13.9013457  | 69.58358832 |
| 5713 | 4753 | 8 | 0 | 6.038211359 | 16.50784802 | 71.00028686 |

|      |      |   |   |             |             |             |
|------|------|---|---|-------------|-------------|-------------|
| 5714 | 4754 | 8 | 0 | 3.392390108 | 17.37668214 | 72.4169854  |
| 5715 | 4755 | 8 | 0 | 10.75350738 | 17.37668214 | 72.4169854  |
| 5716 | 4756 | 8 | 0 | 8.107700279 | 15.63901392 | 72.4169854  |
| 5717 | 4757 | 8 | 0 | 1.32290119  | 15.63901392 | 72.4169854  |
| 5718 | 4758 | 8 | 0 | 26.96889408 | 16.50784802 | 71.00028686 |
| 5719 | 4759 | 8 | 0 | 20.18411357 | 16.50784802 | 71.00028686 |
| 5720 | 4760 | 8 | 0 | 17.53829232 | 17.37668214 | 72.4169854  |
| 5721 | 4761 | 8 | 0 | 24.89940959 | 17.37668214 | 72.4169854  |
| 5722 | 4762 | 8 | 0 | 22.25360249 | 15.63901392 | 72.4169854  |
| 5723 | 4763 | 8 | 0 | 15.4688034  | 15.63901392 | 72.4169854  |
| 5724 | 4764 | 8 | 0 | 12.82299629 | 16.50784802 | 71.00028686 |
| 5725 | 4765 | 8 | 0 | 6.038211359 | 19.11435034 | 72.4169854  |
| 5726 | 4766 | 8 | 0 | 3.392390108 | 19.98318446 | 73.83368394 |
| 5727 | 4767 | 8 | 0 | 10.75350738 | 19.98318446 | 73.83368394 |
| 5728 | 4768 | 8 | 0 | 8.107700279 | 18.24551624 | 73.83368394 |
| 5729 | 4769 | 8 | 0 | 1.32290119  | 18.24551624 | 73.83368394 |
| 5730 | 4770 | 8 | 0 | 26.96889408 | 19.11435034 | 72.4169854  |
| 5731 | 4771 | 8 | 0 | 20.18411357 | 19.11435034 | 72.4169854  |
| 5732 | 4772 | 8 | 0 | 17.53829232 | 19.98318446 | 73.83368394 |
| 5733 | 4773 | 8 | 0 | 24.89940959 | 19.98318446 | 73.83368394 |
| 5734 | 4774 | 8 | 0 | 22.25360249 | 18.24551624 | 73.83368394 |
| 5735 | 4775 | 8 | 0 | 15.4688034  | 18.24551624 | 73.83368394 |
| 5736 | 4776 | 8 | 0 | 12.82299629 | 19.11435034 | 72.4169854  |
| 5737 | 4777 | 8 | 0 | 6.038211359 | 21.72085266 | 73.83368394 |
| 5738 | 4778 | 8 | 0 | 3.392390108 | 22.58968677 | 75.25038248 |
| 5739 | 4779 | 8 | 0 | 10.75350738 | 22.58968677 | 75.25038248 |
| 5740 | 4780 | 8 | 0 | 8.107700279 | 20.85201856 | 75.25038248 |
| 5741 | 4781 | 8 | 0 | 1.32290119  | 20.85201856 | 75.25038248 |
| 5742 | 4782 | 8 | 0 | 26.96889408 | 21.72085266 | 73.83368394 |
| 5743 | 4783 | 8 | 0 | 20.18411357 | 21.72085266 | 73.83368394 |
| 5744 | 4784 | 8 | 0 | 17.53829232 | 22.58968677 | 75.25038248 |
| 5745 | 4785 | 8 | 0 | 24.89940959 | 22.58968677 | 75.25038248 |
| 5746 | 4786 | 8 | 0 | 22.25360249 | 20.85201856 | 75.25038248 |
| 5747 | 4787 | 8 | 0 | 15.4688034  | 20.85201856 | 75.25038248 |
| 5748 | 4788 | 8 | 0 | 12.82299629 | 21.72085266 | 73.83368394 |
| 5749 | 4789 | 8 | 0 | 6.038211359 | 24.32735498 | 75.25038248 |
| 5750 | 4790 | 8 | 0 | 3.392390108 | 25.19618909 | 76.66708102 |
| 5751 | 4791 | 8 | 0 | 10.75350738 | 25.19618909 | 76.66708102 |
| 5752 | 4792 | 8 | 0 | 8.107700279 | 23.45852088 | 76.66708102 |
| 5753 | 4793 | 8 | 0 | 1.32290119  | 23.45852088 | 76.66708102 |
| 5754 | 4794 | 8 | 0 | 26.96889408 | 24.32735498 | 75.25038248 |
| 5755 | 4795 | 8 | 0 | 20.18411357 | 24.32735498 | 75.25038248 |
| 5756 | 4796 | 8 | 0 | 17.53829232 | 25.19618909 | 76.66708102 |
| 5757 | 4797 | 8 | 0 | 24.89940959 | 25.19618909 | 76.66708102 |
| 5758 | 4798 | 8 | 0 | 22.25360249 | 23.45852088 | 76.66708102 |
| 5759 | 4799 | 8 | 0 | 15.4688034  | 23.45852088 | 76.66708102 |
| 5760 | 4800 | 8 | 0 | 12.82299629 | 24.32735498 | 75.25038248 |
| 5761 | 4801 | 8 | 0 | 6.038211359 | 26.9338573  | 76.66708102 |
| 5762 | 4802 | 8 | 0 | 3.392390108 | 27.80269141 | 78.08377956 |
| 5763 | 4803 | 8 | 0 | 10.75350738 | 27.80269141 | 78.08377956 |
| 5764 | 4804 | 8 | 0 | 8.107700279 | 26.0650232  | 78.08377956 |

|      |      |   |   |             |             |             |
|------|------|---|---|-------------|-------------|-------------|
| 5765 | 4805 | 8 | 0 | 1.32290119  | 26.0650232  | 78.08377956 |
| 5766 | 4806 | 8 | 0 | 26.96889408 | 26.9338573  | 76.66708102 |
| 5767 | 4807 | 8 | 0 | 20.18411357 | 26.9338573  | 76.66708102 |
| 5768 | 4808 | 8 | 0 | 17.53829232 | 27.80269141 | 78.08377956 |
| 5769 | 4809 | 8 | 0 | 24.89940959 | 27.80269141 | 78.08377956 |
| 5770 | 4810 | 8 | 0 | 22.25360249 | 26.0650232  | 78.08377956 |
| 5771 | 4811 | 8 | 0 | 15.4688034  | 26.0650232  | 78.08377956 |
| 5772 | 4812 | 8 | 0 | 12.82299629 | 26.9338573  | 76.66708102 |
| 5773 | 4813 | 8 | 0 | 6.038211359 | 29.54035962 | 78.08377956 |
| 5774 | 4814 | 8 | 0 | 3.392390108 | 30.40919373 | 79.5004781  |
| 5775 | 4815 | 8 | 0 | 10.75350738 | 30.40919373 | 79.5004781  |
| 5776 | 4816 | 8 | 0 | 8.107700279 | 28.67152552 | 79.5004781  |
| 5777 | 4817 | 8 | 0 | 1.32290119  | 28.67152552 | 79.5004781  |
| 5778 | 4818 | 8 | 0 | 26.96889408 | 29.54035962 | 78.08377956 |
| 5779 | 4819 | 8 | 0 | 20.18411357 | 29.54035962 | 78.08377956 |
| 5780 | 4820 | 8 | 0 | 17.53829232 | 30.40919373 | 79.5004781  |
| 5781 | 4821 | 8 | 0 | 24.89940959 | 30.40919373 | 79.5004781  |
| 5782 | 4822 | 8 | 0 | 22.25360249 | 28.67152552 | 79.5004781  |
| 5783 | 4823 | 8 | 0 | 15.4688034  | 28.67152552 | 79.5004781  |
| 5784 | 4824 | 8 | 0 | 12.82299629 | 29.54035962 | 78.08377956 |
| 5785 | 4825 | 8 | 0 | 6.038211359 | 0.86883411  | 59.66669854 |
| 5786 | 4826 | 8 | 0 | 3.392390108 | 1.73766822  | 61.08339708 |
| 5787 | 4827 | 8 | 0 | 10.75350738 | 1.73766822  | 61.08339708 |
| 5788 | 4828 | 8 | 0 | 8.107700279 | 0           | 61.08339708 |
| 5789 | 4829 | 8 | 0 | 1.32290119  | 0           | 61.08339708 |
| 5790 | 4830 | 8 | 0 | 26.96889408 | 0.86883411  | 59.66669854 |
| 5791 | 4831 | 8 | 0 | 20.18411357 | 0.86883411  | 59.66669854 |
| 5792 | 4832 | 8 | 0 | 17.53829232 | 1.73766822  | 61.08339708 |
| 5793 | 4833 | 8 | 0 | 24.89940959 | 1.73766822  | 61.08339708 |
| 5794 | 4834 | 8 | 0 | 22.25360249 | 0           | 61.08339708 |
| 5795 | 4835 | 8 | 0 | 15.4688034  | 0           | 61.08339708 |
| 5796 | 4836 | 8 | 0 | 12.82299629 | 0.86883411  | 59.66669854 |
| 5797 | 4837 | 8 | 0 | 6.038211359 | 3.475336426 | 61.08339708 |
| 5798 | 4838 | 8 | 0 | 3.392390108 | 4.34417054  | 62.50009562 |
| 5799 | 4839 | 8 | 0 | 10.75350738 | 4.34417054  | 62.50009562 |
| 5800 | 4840 | 8 | 0 | 8.107700279 | 2.60650232  | 62.50009562 |
| 5801 | 4841 | 8 | 0 | 1.32290119  | 2.60650232  | 62.50009562 |
| 5802 | 4842 | 8 | 0 | 26.96889408 | 3.475336426 | 61.08339708 |
| 5803 | 4843 | 8 | 0 | 20.18411357 | 3.475336426 | 61.08339708 |
| 5804 | 4844 | 8 | 0 | 17.53829232 | 4.34417054  | 62.50009562 |
| 5805 | 4845 | 8 | 0 | 24.89940959 | 4.34417054  | 62.50009562 |
| 5806 | 4846 | 8 | 0 | 22.25360249 | 2.60650232  | 62.50009562 |
| 5807 | 4847 | 8 | 0 | 15.4688034  | 2.60650232  | 62.50009562 |
| 5808 | 4848 | 8 | 0 | 12.82299629 | 3.475336426 | 61.08339708 |
| 5809 | 4849 | 8 | 0 | 6.038211359 | 6.081838745 | 62.50009562 |
| 5810 | 4850 | 8 | 0 | 3.392390108 | 6.950672859 | 63.91679416 |
| 5811 | 4851 | 8 | 0 | 10.75350738 | 6.950672859 | 63.91679416 |
| 5812 | 4852 | 8 | 0 | 8.107700279 | 5.213004642 | 63.91679416 |
| 5813 | 4853 | 8 | 0 | 1.32290119  | 5.213004642 | 63.91679416 |
| 5814 | 4854 | 8 | 0 | 26.96889408 | 6.081838745 | 62.50009562 |
| 5815 | 4855 | 8 | 0 | 20.18411357 | 6.081838745 | 62.50009562 |

|      |      |   |   |             |             |             |
|------|------|---|---|-------------|-------------|-------------|
| 5816 | 4856 | 8 | 0 | 17.53829232 | 6.950672859 | 63.91679416 |
| 5817 | 4857 | 8 | 0 | 24.89940959 | 6.950672859 | 63.91679416 |
| 5818 | 4858 | 8 | 0 | 22.25360249 | 5.213004642 | 63.91679416 |
| 5819 | 4859 | 8 | 0 | 15.4688034  | 5.213004642 | 63.91679416 |
| 5820 | 4860 | 8 | 0 | 12.82299629 | 6.081838745 | 62.50009562 |
| 5821 | 4861 | 8 | 0 | 6.038211359 | 8.688341064 | 63.91679416 |
| 5822 | 4862 | 8 | 0 | 3.392390108 | 9.557175178 | 65.3334927  |
| 5823 | 4863 | 8 | 0 | 10.75350738 | 9.557175178 | 65.3334927  |
| 5824 | 4864 | 8 | 0 | 8.107700279 | 7.819506962 | 65.3334927  |
| 5825 | 4865 | 8 | 0 | 1.32290119  | 7.819506962 | 65.3334927  |
| 5826 | 4866 | 8 | 0 | 26.96889408 | 8.688341064 | 63.91679416 |
| 5827 | 4867 | 8 | 0 | 20.18411357 | 8.688341064 | 63.91679416 |
| 5828 | 4868 | 8 | 0 | 17.53829232 | 9.557175178 | 65.3334927  |
| 5829 | 4869 | 8 | 0 | 24.89940959 | 9.557175178 | 65.3334927  |
| 5830 | 4870 | 8 | 0 | 22.25360249 | 7.819506962 | 65.3334927  |
| 5831 | 4871 | 8 | 0 | 15.4688034  | 7.819506962 | 65.3334927  |
| 5832 | 4872 | 8 | 0 | 12.82299629 | 8.688341064 | 63.91679416 |
| 5833 | 4873 | 8 | 0 | 6.038211359 | 11.29484338 | 65.3334927  |
| 5834 | 4874 | 8 | 0 | 3.392390108 | 12.1636775  | 66.75019124 |
| 5835 | 4875 | 8 | 0 | 10.75350738 | 12.1636775  | 66.75019124 |
| 5836 | 4876 | 8 | 0 | 8.107700279 | 10.42600928 | 66.75019124 |
| 5837 | 4877 | 8 | 0 | 1.32290119  | 10.42600928 | 66.75019124 |
| 5838 | 4878 | 8 | 0 | 26.96889408 | 11.29484338 | 65.3334927  |
| 5839 | 4879 | 8 | 0 | 20.18411357 | 11.29484338 | 65.3334927  |
| 5840 | 4880 | 8 | 0 | 17.53829232 | 12.1636775  | 66.75019124 |
| 5841 | 4881 | 8 | 0 | 24.89940959 | 12.1636775  | 66.75019124 |
| 5842 | 4882 | 8 | 0 | 22.25360249 | 10.42600928 | 66.75019124 |
| 5843 | 4883 | 8 | 0 | 15.4688034  | 10.42600928 | 66.75019124 |
| 5844 | 4884 | 8 | 0 | 12.82299629 | 11.29484338 | 65.3334927  |
| 5845 | 4885 | 8 | 0 | 6.038211359 | 13.9013457  | 66.75019124 |
| 5846 | 4886 | 8 | 0 | 3.392390108 | 14.77017982 | 68.16688978 |
| 5847 | 4887 | 8 | 0 | 10.75350738 | 14.77017982 | 68.16688978 |
| 5848 | 4888 | 8 | 0 | 8.107700279 | 13.0325116  | 68.16688978 |
| 5849 | 4889 | 8 | 0 | 1.32290119  | 13.0325116  | 68.16688978 |
| 5850 | 4890 | 8 | 0 | 26.96889408 | 13.9013457  | 66.75019124 |
| 5851 | 4891 | 8 | 0 | 20.18411357 | 13.9013457  | 66.75019124 |
| 5852 | 4892 | 8 | 0 | 17.53829232 | 14.77017982 | 68.16688978 |
| 5853 | 4893 | 8 | 0 | 24.89940959 | 14.77017982 | 68.16688978 |
| 5854 | 4894 | 8 | 0 | 22.25360249 | 13.0325116  | 68.16688978 |
| 5855 | 4895 | 8 | 0 | 15.4688034  | 13.0325116  | 68.16688978 |
| 5856 | 4896 | 8 | 0 | 12.82299629 | 13.9013457  | 66.75019124 |
| 5857 | 4897 | 8 | 0 | 6.038211359 | 16.50784802 | 68.16688978 |
| 5858 | 4898 | 8 | 0 | 3.392390108 | 17.37668214 | 69.58358832 |
| 5859 | 4899 | 8 | 0 | 10.75350738 | 17.37668214 | 69.58358832 |
| 5860 | 4900 | 8 | 0 | 8.107700279 | 15.63901392 | 69.58358832 |
| 5861 | 4901 | 8 | 0 | 1.32290119  | 15.63901392 | 69.58358832 |
| 5862 | 4902 | 8 | 0 | 26.96889408 | 16.50784802 | 68.16688978 |
| 5863 | 4903 | 8 | 0 | 20.18411357 | 16.50784802 | 68.16688978 |
| 5864 | 4904 | 8 | 0 | 17.53829232 | 17.37668214 | 69.58358832 |
| 5865 | 4905 | 8 | 0 | 24.89940959 | 17.37668214 | 69.58358832 |
| 5866 | 4906 | 8 | 0 | 22.25360249 | 15.63901392 | 69.58358832 |

|      |      |   |   |             |             |             |
|------|------|---|---|-------------|-------------|-------------|
| 5867 | 4907 | 8 | 0 | 15.4688034  | 15.63901392 | 69.58358832 |
| 5868 | 4908 | 8 | 0 | 12.82299629 | 16.50784802 | 68.16688978 |
| 5869 | 4909 | 8 | 0 | 6.038211359 | 19.11435034 | 69.58358832 |
| 5870 | 4910 | 8 | 0 | 3.392390108 | 19.98318446 | 71.00028686 |
| 5871 | 4911 | 8 | 0 | 10.75350738 | 19.98318446 | 71.00028686 |
| 5872 | 4912 | 8 | 0 | 8.107700279 | 18.24551624 | 71.00028686 |
| 5873 | 4913 | 8 | 0 | 1.32290119  | 18.24551624 | 71.00028686 |
| 5874 | 4914 | 8 | 0 | 26.96889408 | 19.11435034 | 69.58358832 |
| 5875 | 4915 | 8 | 0 | 20.18411357 | 19.11435034 | 69.58358832 |
| 5876 | 4916 | 8 | 0 | 17.53829232 | 19.98318446 | 71.00028686 |
| 5877 | 4917 | 8 | 0 | 24.89940959 | 19.98318446 | 71.00028686 |
| 5878 | 4918 | 8 | 0 | 22.25360249 | 18.24551624 | 71.00028686 |
| 5879 | 4919 | 8 | 0 | 15.4688034  | 18.24551624 | 71.00028686 |
| 5880 | 4920 | 8 | 0 | 12.82299629 | 19.11435034 | 69.58358832 |
| 5881 | 4921 | 8 | 0 | 6.038211359 | 21.72085266 | 71.00028686 |
| 5882 | 4922 | 8 | 0 | 3.392390108 | 22.58968677 | 72.4169854  |
| 5883 | 4923 | 8 | 0 | 10.75350738 | 22.58968677 | 72.4169854  |
| 5884 | 4924 | 8 | 0 | 8.107700279 | 20.85201856 | 72.4169854  |
| 5885 | 4925 | 8 | 0 | 1.32290119  | 20.85201856 | 72.4169854  |
| 5886 | 4926 | 8 | 0 | 26.96889408 | 21.72085266 | 71.00028686 |
| 5887 | 4927 | 8 | 0 | 20.18411357 | 21.72085266 | 71.00028686 |
| 5888 | 4928 | 8 | 0 | 17.53829232 | 22.58968677 | 72.4169854  |
| 5889 | 4929 | 8 | 0 | 24.89940959 | 22.58968677 | 72.4169854  |
| 5890 | 4930 | 8 | 0 | 22.25360249 | 20.85201856 | 72.4169854  |
| 5891 | 4931 | 8 | 0 | 15.4688034  | 20.85201856 | 72.4169854  |
| 5892 | 4932 | 8 | 0 | 12.82299629 | 21.72085266 | 71.00028686 |
| 5893 | 4933 | 8 | 0 | 6.038211359 | 24.32735498 | 72.4169854  |
| 5894 | 4934 | 8 | 0 | 3.392390108 | 25.19618909 | 73.83368394 |
| 5895 | 4935 | 8 | 0 | 10.75350738 | 25.19618909 | 73.83368394 |
| 5896 | 4936 | 8 | 0 | 8.107700279 | 23.45852088 | 73.83368394 |
| 5897 | 4937 | 8 | 0 | 1.32290119  | 23.45852088 | 73.83368394 |
| 5898 | 4938 | 8 | 0 | 26.96889408 | 24.32735498 | 72.4169854  |
| 5899 | 4939 | 8 | 0 | 20.18411357 | 24.32735498 | 72.4169854  |
| 5900 | 4940 | 8 | 0 | 17.53829232 | 25.19618909 | 73.83368394 |
| 5901 | 4941 | 8 | 0 | 24.89940959 | 25.19618909 | 73.83368394 |
| 5902 | 4942 | 8 | 0 | 22.25360249 | 23.45852088 | 73.83368394 |
| 5903 | 4943 | 8 | 0 | 15.4688034  | 23.45852088 | 73.83368394 |
| 5904 | 4944 | 8 | 0 | 12.82299629 | 24.32735498 | 72.4169854  |
| 5905 | 4945 | 8 | 0 | 6.038211359 | 26.9338573  | 73.83368394 |
| 5906 | 4946 | 8 | 0 | 3.392390108 | 27.80269141 | 75.25038248 |
| 5907 | 4947 | 8 | 0 | 10.75350738 | 27.80269141 | 75.25038248 |
| 5908 | 4948 | 8 | 0 | 8.107700279 | 26.0650232  | 75.25038248 |
| 5909 | 4949 | 8 | 0 | 1.32290119  | 26.0650232  | 75.25038248 |
| 5910 | 4950 | 8 | 0 | 26.96889408 | 26.9338573  | 73.83368394 |
| 5911 | 4951 | 8 | 0 | 20.18411357 | 26.9338573  | 73.83368394 |
| 5912 | 4952 | 8 | 0 | 17.53829232 | 27.80269141 | 75.25038248 |
| 5913 | 4953 | 8 | 0 | 24.89940959 | 27.80269141 | 75.25038248 |
| 5914 | 4954 | 8 | 0 | 22.25360249 | 26.0650232  | 75.25038248 |
| 5915 | 4955 | 8 | 0 | 15.4688034  | 26.0650232  | 75.25038248 |
| 5916 | 4956 | 8 | 0 | 12.82299629 | 26.9338573  | 73.83368394 |
| 5917 | 4957 | 8 | 0 | 6.038211359 | 29.54035962 | 75.25038248 |

|      |      |   |   |             |             |             |
|------|------|---|---|-------------|-------------|-------------|
| 5918 | 4958 | 8 | 0 | 3.392390108 | 30.40919373 | 76.66708102 |
| 5919 | 4959 | 8 | 0 | 10.75350738 | 30.40919373 | 76.66708102 |
| 5920 | 4960 | 8 | 0 | 8.107700279 | 28.67152552 | 76.66708102 |
| 5921 | 4961 | 8 | 0 | 1.32290119  | 28.67152552 | 76.66708102 |
| 5922 | 4962 | 8 | 0 | 26.96889408 | 29.54035962 | 75.25038248 |
| 5923 | 4963 | 8 | 0 | 20.18411357 | 29.54035962 | 75.25038248 |
| 5924 | 4964 | 8 | 0 | 17.53829232 | 30.40919373 | 76.66708102 |
| 5925 | 4965 | 8 | 0 | 24.89940959 | 30.40919373 | 76.66708102 |
| 5926 | 4966 | 8 | 0 | 22.25360249 | 28.67152552 | 76.66708102 |
| 5927 | 4967 | 8 | 0 | 15.4688034  | 28.67152552 | 76.66708102 |
| 5928 | 4968 | 8 | 0 | 12.82299629 | 29.54035962 | 75.25038248 |
| 5929 | 4969 | 8 | 0 | 3.392390108 | 1.73766822  | 58.25       |
| 5930 | 4970 | 8 | 0 | 10.75350738 | 1.73766822  | 58.25       |
| 5931 | 4971 | 8 | 0 | 8.107700279 | 0           | 58.25       |
| 5932 | 4972 | 8 | 0 | 1.32290119  | 0           | 58.25       |
| 5933 | 4973 | 8 | 0 | 17.53829232 | 1.73766822  | 58.25       |
| 5934 | 4974 | 8 | 0 | 24.89940959 | 1.73766822  | 58.25       |
| 5935 | 4975 | 8 | 0 | 22.25360249 | 0           | 58.25       |
| 5936 | 4976 | 8 | 0 | 15.4688034  | 0           | 58.25       |
| 5937 | 4977 | 8 | 0 | 6.038211359 | 3.475336426 | 58.25       |
| 5938 | 4978 | 8 | 0 | 3.392390108 | 4.34417054  | 59.66669854 |
| 5939 | 4979 | 8 | 0 | 10.75350738 | 4.34417054  | 59.66669854 |
| 5940 | 4980 | 8 | 0 | 8.107700279 | 2.60650232  | 59.66669854 |
| 5941 | 4981 | 8 | 0 | 1.32290119  | 2.60650232  | 59.66669854 |
| 5942 | 4982 | 8 | 0 | 26.96889408 | 3.475336426 | 58.25       |
| 5943 | 4983 | 8 | 0 | 20.18411357 | 3.475336426 | 58.25       |
| 5944 | 4984 | 8 | 0 | 17.53829232 | 4.34417054  | 59.66669854 |
| 5945 | 4985 | 8 | 0 | 24.89940959 | 4.34417054  | 59.66669854 |
| 5946 | 4986 | 8 | 0 | 22.25360249 | 2.60650232  | 59.66669854 |
| 5947 | 4987 | 8 | 0 | 15.4688034  | 2.60650232  | 59.66669854 |
| 5948 | 4988 | 8 | 0 | 12.82299629 | 3.475336426 | 58.25       |
| 5949 | 4989 | 8 | 0 | 6.038211359 | 6.081838745 | 59.66669854 |
| 5950 | 4990 | 8 | 0 | 3.392390108 | 6.950672859 | 61.08339708 |
| 5951 | 4991 | 8 | 0 | 10.75350738 | 6.950672859 | 61.08339708 |
| 5952 | 4992 | 8 | 0 | 8.107700279 | 5.213004642 | 61.08339708 |
| 5953 | 4993 | 8 | 0 | 1.32290119  | 5.213004642 | 61.08339708 |
| 5954 | 4994 | 8 | 0 | 26.96889408 | 6.081838745 | 59.66669854 |
| 5955 | 4995 | 8 | 0 | 20.18411357 | 6.081838745 | 59.66669854 |
| 5956 | 4996 | 8 | 0 | 17.53829232 | 6.950672859 | 61.08339708 |
| 5957 | 4997 | 8 | 0 | 24.89940959 | 6.950672859 | 61.08339708 |
| 5958 | 4998 | 8 | 0 | 22.25360249 | 5.213004642 | 61.08339708 |
| 5959 | 4999 | 8 | 0 | 15.4688034  | 5.213004642 | 61.08339708 |
| 5960 | 5000 | 8 | 0 | 12.82299629 | 6.081838745 | 59.66669854 |
| 5961 | 5001 | 8 | 0 | 6.038211359 | 8.688341064 | 61.08339708 |
| 5962 | 5002 | 8 | 0 | 3.392390108 | 9.557175178 | 62.50009562 |
| 5963 | 5003 | 8 | 0 | 10.75350738 | 9.557175178 | 62.50009562 |
| 5964 | 5004 | 8 | 0 | 8.107700279 | 7.819506962 | 62.50009562 |
| 5965 | 5005 | 8 | 0 | 1.32290119  | 7.819506962 | 62.50009562 |
| 5966 | 5006 | 8 | 0 | 26.96889408 | 8.688341064 | 61.08339708 |
| 5967 | 5007 | 8 | 0 | 20.18411357 | 8.688341064 | 61.08339708 |
| 5968 | 5008 | 8 | 0 | 17.53829232 | 9.557175178 | 62.50009562 |

|      |      |   |   |             |             |             |
|------|------|---|---|-------------|-------------|-------------|
| 5969 | 5009 | 8 | 0 | 24.89940959 | 9.557175178 | 62.50009562 |
| 5970 | 5010 | 8 | 0 | 22.25360249 | 7.819506962 | 62.50009562 |
| 5971 | 5011 | 8 | 0 | 15.4688034  | 7.819506962 | 62.50009562 |
| 5972 | 5012 | 8 | 0 | 12.82299629 | 8.688341064 | 61.08339708 |
| 5973 | 5013 | 8 | 0 | 6.038211359 | 11.29484338 | 62.50009562 |
| 5974 | 5014 | 8 | 0 | 3.392390108 | 12.1636775  | 63.91679416 |
| 5975 | 5015 | 8 | 0 | 10.75350738 | 12.1636775  | 63.91679416 |
| 5976 | 5016 | 8 | 0 | 8.107700279 | 10.42600928 | 63.91679416 |
| 5977 | 5017 | 8 | 0 | 1.32290119  | 10.42600928 | 63.91679416 |
| 5978 | 5018 | 8 | 0 | 26.96889408 | 11.29484338 | 62.50009562 |
| 5979 | 5019 | 8 | 0 | 20.18411357 | 11.29484338 | 62.50009562 |
| 5980 | 5020 | 8 | 0 | 17.53829232 | 12.1636775  | 63.91679416 |
| 5981 | 5021 | 8 | 0 | 24.89940959 | 12.1636775  | 63.91679416 |
| 5982 | 5022 | 8 | 0 | 22.25360249 | 10.42600928 | 63.91679416 |
| 5983 | 5023 | 8 | 0 | 15.4688034  | 10.42600928 | 63.91679416 |
| 5984 | 5024 | 8 | 0 | 12.82299629 | 11.29484338 | 62.50009562 |
| 5985 | 5025 | 8 | 0 | 6.038211359 | 13.9013457  | 63.91679416 |
| 5986 | 5026 | 8 | 0 | 3.392390108 | 14.77017982 | 65.3334927  |
| 5987 | 5027 | 8 | 0 | 10.75350738 | 14.77017982 | 65.3334927  |
| 5988 | 5028 | 8 | 0 | 8.107700279 | 13.0325116  | 65.3334927  |
| 5989 | 5029 | 8 | 0 | 1.32290119  | 13.0325116  | 65.3334927  |
| 5990 | 5030 | 8 | 0 | 26.96889408 | 13.9013457  | 63.91679416 |
| 5991 | 5031 | 8 | 0 | 20.18411357 | 13.9013457  | 63.91679416 |
| 5992 | 5032 | 8 | 0 | 17.53829232 | 14.77017982 | 65.3334927  |
| 5993 | 5033 | 8 | 0 | 24.89940959 | 14.77017982 | 65.3334927  |
| 5994 | 5034 | 8 | 0 | 22.25360249 | 13.0325116  | 65.3334927  |
| 5995 | 5035 | 8 | 0 | 15.4688034  | 13.0325116  | 65.3334927  |
| 5996 | 5036 | 8 | 0 | 12.82299629 | 13.9013457  | 63.91679416 |
| 5997 | 5037 | 8 | 0 | 6.038211359 | 16.50784802 | 65.3334927  |
| 5998 | 5038 | 8 | 0 | 3.392390108 | 17.37668214 | 66.75019124 |
| 5999 | 5039 | 8 | 0 | 10.75350738 | 17.37668214 | 66.75019124 |
| 6000 | 5040 | 8 | 0 | 8.107700279 | 15.63901392 | 66.75019124 |
| 6001 | 5041 | 8 | 0 | 1.32290119  | 15.63901392 | 66.75019124 |
| 6002 | 5042 | 8 | 0 | 26.96889408 | 16.50784802 | 65.3334927  |
| 6003 | 5043 | 8 | 0 | 20.18411357 | 16.50784802 | 65.3334927  |
| 6004 | 5044 | 8 | 0 | 17.53829232 | 17.37668214 | 66.75019124 |
| 6005 | 5045 | 8 | 0 | 24.89940959 | 17.37668214 | 66.75019124 |
| 6006 | 5046 | 8 | 0 | 22.25360249 | 15.63901392 | 66.75019124 |
| 6007 | 5047 | 8 | 0 | 15.4688034  | 15.63901392 | 66.75019124 |
| 6008 | 5048 | 8 | 0 | 12.82299629 | 16.50784802 | 65.3334927  |
| 6009 | 5049 | 8 | 0 | 6.038211359 | 19.11435034 | 66.75019124 |
| 6010 | 5050 | 8 | 0 | 3.392390108 | 19.98318446 | 68.16688978 |
| 6011 | 5051 | 8 | 0 | 10.75350738 | 19.98318446 | 68.16688978 |
| 6012 | 5052 | 8 | 0 | 8.107700279 | 18.24551624 | 68.16688978 |
| 6013 | 5053 | 8 | 0 | 1.32290119  | 18.24551624 | 68.16688978 |
| 6014 | 5054 | 8 | 0 | 26.96889408 | 19.11435034 | 66.75019124 |
| 6015 | 5055 | 8 | 0 | 20.18411357 | 19.11435034 | 66.75019124 |
| 6016 | 5056 | 8 | 0 | 17.53829232 | 19.98318446 | 68.16688978 |
| 6017 | 5057 | 8 | 0 | 24.89940959 | 19.98318446 | 68.16688978 |
| 6018 | 5058 | 8 | 0 | 22.25360249 | 18.24551624 | 68.16688978 |
| 6019 | 5059 | 8 | 0 | 15.4688034  | 18.24551624 | 68.16688978 |

|      |      |   |   |             |             |             |
|------|------|---|---|-------------|-------------|-------------|
| 6020 | 5060 | 8 | 0 | 12.82299629 | 19.11435034 | 66.75019124 |
| 6021 | 5061 | 8 | 0 | 6.038211359 | 21.72085266 | 68.16688978 |
| 6022 | 5062 | 8 | 0 | 3.392390108 | 22.58968677 | 69.58358832 |
| 6023 | 5063 | 8 | 0 | 10.75350738 | 22.58968677 | 69.58358832 |
| 6024 | 5064 | 8 | 0 | 8.107700279 | 20.85201856 | 69.58358832 |
| 6025 | 5065 | 8 | 0 | 1.32290119  | 20.85201856 | 69.58358832 |
| 6026 | 5066 | 8 | 0 | 26.96889408 | 21.72085266 | 68.16688978 |
| 6027 | 5067 | 8 | 0 | 20.18411357 | 21.72085266 | 68.16688978 |
| 6028 | 5068 | 8 | 0 | 17.53829232 | 22.58968677 | 69.58358832 |
| 6029 | 5069 | 8 | 0 | 24.89940959 | 22.58968677 | 69.58358832 |
| 6030 | 5070 | 8 | 0 | 22.25360249 | 20.85201856 | 69.58358832 |
| 6031 | 5071 | 8 | 0 | 15.4688034  | 20.85201856 | 69.58358832 |
| 6032 | 5072 | 8 | 0 | 12.82299629 | 21.72085266 | 68.16688978 |
| 6033 | 5073 | 8 | 0 | 6.038211359 | 24.32735498 | 69.58358832 |
| 6034 | 5074 | 8 | 0 | 3.392390108 | 25.19618909 | 71.00028686 |
| 6035 | 5075 | 8 | 0 | 10.75350738 | 25.19618909 | 71.00028686 |
| 6036 | 5076 | 8 | 0 | 8.107700279 | 23.45852088 | 71.00028686 |
| 6037 | 5077 | 8 | 0 | 1.32290119  | 23.45852088 | 71.00028686 |
| 6038 | 5078 | 8 | 0 | 26.96889408 | 24.32735498 | 69.58358832 |
| 6039 | 5079 | 8 | 0 | 20.18411357 | 24.32735498 | 69.58358832 |
| 6040 | 5080 | 8 | 0 | 17.53829232 | 25.19618909 | 71.00028686 |
| 6041 | 5081 | 8 | 0 | 24.89940959 | 25.19618909 | 71.00028686 |
| 6042 | 5082 | 8 | 0 | 22.25360249 | 23.45852088 | 71.00028686 |
| 6043 | 5083 | 8 | 0 | 15.4688034  | 23.45852088 | 71.00028686 |
| 6044 | 5084 | 8 | 0 | 12.82299629 | 24.32735498 | 69.58358832 |
| 6045 | 5085 | 8 | 0 | 6.038211359 | 26.9338573  | 71.00028686 |
| 6046 | 5086 | 8 | 0 | 3.392390108 | 27.80269141 | 72.4169854  |
| 6047 | 5087 | 8 | 0 | 10.75350738 | 27.80269141 | 72.4169854  |
| 6048 | 5088 | 8 | 0 | 8.107700279 | 26.0650232  | 72.4169854  |
| 6049 | 5089 | 8 | 0 | 1.32290119  | 26.0650232  | 72.4169854  |
| 6050 | 5090 | 8 | 0 | 26.96889408 | 26.9338573  | 71.00028686 |
| 6051 | 5091 | 8 | 0 | 20.18411357 | 26.9338573  | 71.00028686 |
| 6052 | 5092 | 8 | 0 | 17.53829232 | 27.80269141 | 72.4169854  |
| 6053 | 5093 | 8 | 0 | 24.89940959 | 27.80269141 | 72.4169854  |
| 6054 | 5094 | 8 | 0 | 22.25360249 | 26.0650232  | 72.4169854  |
| 6055 | 5095 | 8 | 0 | 15.4688034  | 26.0650232  | 72.4169854  |
| 6056 | 5096 | 8 | 0 | 12.82299629 | 26.9338573  | 71.00028686 |
| 6057 | 5097 | 8 | 0 | 6.038211359 | 29.54035962 | 72.4169854  |
| 6058 | 5098 | 8 | 0 | 3.392390108 | 30.40919373 | 73.83368394 |
| 6059 | 5099 | 8 | 0 | 10.75350738 | 30.40919373 | 73.83368394 |
| 6060 | 5100 | 8 | 0 | 8.107700279 | 28.67152552 | 73.83368394 |
| 6061 | 5101 | 8 | 0 | 1.32290119  | 28.67152552 | 73.83368394 |
| 6062 | 5102 | 8 | 0 | 26.96889408 | 29.54035962 | 72.4169854  |
| 6063 | 5103 | 8 | 0 | 20.18411357 | 29.54035962 | 72.4169854  |
| 6064 | 5104 | 8 | 0 | 17.53829232 | 30.40919373 | 73.83368394 |
| 6065 | 5105 | 8 | 0 | 24.89940959 | 30.40919373 | 73.83368394 |
| 6066 | 5106 | 8 | 0 | 22.25360249 | 28.67152552 | 73.83368394 |
| 6067 | 5107 | 8 | 0 | 15.4688034  | 28.67152552 | 73.83368394 |
| 6068 | 5108 | 8 | 0 | 12.82299629 | 29.54035962 | 72.4169854  |
| 6069 | 5109 | 8 | 0 | 3.392390108 | 6.950672859 | 58.25       |
| 6070 | 5110 | 8 | 0 | 10.75350738 | 6.950672859 | 58.25       |



|      |      |   |   |             |             |             |
|------|------|---|---|-------------|-------------|-------------|
| 6071 | 5111 | 8 | 0 | 8.107700279 | 5.213004642 | 58.25       |
| 6072 | 5112 | 8 | 0 | 1.32290119  | 5.213004642 | 58.25       |
| 6073 | 5113 | 8 | 0 | 17.53829232 | 6.950672859 | 58.25       |
| 6074 | 5114 | 8 | 0 | 24.89940959 | 6.950672859 | 58.25       |
| 6075 | 5115 | 8 | 0 | 22.25360249 | 5.213004642 | 58.25       |
| 6076 | 5116 | 8 | 0 | 15.4688034  | 5.213004642 | 58.25       |
| 6077 | 5117 | 8 | 0 | 6.038211359 | 8.688341064 | 58.25       |
| 6078 | 5118 | 8 | 0 | 3.392390108 | 9.557175178 | 59.66669854 |
| 6079 | 5119 | 8 | 0 | 10.75350738 | 9.557175178 | 59.66669854 |
| 6080 | 5120 | 8 | 0 | 8.107700279 | 7.819506962 | 59.66669854 |
| 6081 | 5121 | 8 | 0 | 1.32290119  | 7.819506962 | 59.66669854 |
| 6082 | 5122 | 8 | 0 | 26.96889408 | 8.688341064 | 58.25       |
| 6083 | 5123 | 8 | 0 | 20.18411357 | 8.688341064 | 58.25       |
| 6084 | 5124 | 8 | 0 | 17.53829232 | 9.557175178 | 59.66669854 |
| 6085 | 5125 | 8 | 0 | 24.89940959 | 9.557175178 | 59.66669854 |
| 6086 | 5126 | 8 | 0 | 22.25360249 | 7.819506962 | 59.66669854 |
| 6087 | 5127 | 8 | 0 | 15.4688034  | 7.819506962 | 59.66669854 |
| 6088 | 5128 | 8 | 0 | 12.82299629 | 8.688341064 | 58.25       |
| 6089 | 5129 | 8 | 0 | 6.038211359 | 11.29484338 | 59.66669854 |
| 6090 | 5130 | 8 | 0 | 3.392390108 | 12.1636775  | 61.08339708 |
| 6091 | 5131 | 8 | 0 | 10.75350738 | 12.1636775  | 61.08339708 |
| 6092 | 5132 | 8 | 0 | 8.107700279 | 10.42600928 | 61.08339708 |
| 6093 | 5133 | 8 | 0 | 1.32290119  | 10.42600928 | 61.08339708 |
| 6094 | 5134 | 8 | 0 | 26.96889408 | 11.29484338 | 59.66669854 |
| 6095 | 5135 | 8 | 0 | 20.18411357 | 11.29484338 | 59.66669854 |
| 6096 | 5136 | 8 | 0 | 17.53829232 | 12.1636775  | 61.08339708 |
| 6097 | 5137 | 8 | 0 | 24.89940959 | 12.1636775  | 61.08339708 |
| 6098 | 5138 | 8 | 0 | 22.25360249 | 10.42600928 | 61.08339708 |
| 6099 | 5139 | 8 | 0 | 15.4688034  | 10.42600928 | 61.08339708 |
| 6100 | 5140 | 8 | 0 | 12.82299629 | 11.29484338 | 59.66669854 |
| 6101 | 5141 | 8 | 0 | 6.038211359 | 13.9013457  | 61.08339708 |
| 6102 | 5142 | 8 | 0 | 3.392390108 | 14.77017982 | 62.50009562 |
| 6103 | 5143 | 8 | 0 | 10.75350738 | 14.77017982 | 62.50009562 |
| 6104 | 5144 | 8 | 0 | 8.107700279 | 13.0325116  | 62.50009562 |
| 6105 | 5145 | 8 | 0 | 1.32290119  | 13.0325116  | 62.50009562 |
| 6106 | 5146 | 8 | 0 | 26.96889408 | 13.9013457  | 61.08339708 |
| 6107 | 5147 | 8 | 0 | 20.18411357 | 13.9013457  | 61.08339708 |
| 6108 | 5148 | 8 | 0 | 17.53829232 | 14.77017982 | 62.50009562 |
| 6109 | 5149 | 8 | 0 | 24.89940959 | 14.77017982 | 62.50009562 |
| 6110 | 5150 | 8 | 0 | 22.25360249 | 13.0325116  | 62.50009562 |
| 6111 | 5151 | 8 | 0 | 15.4688034  | 13.0325116  | 62.50009562 |
| 6112 | 5152 | 8 | 0 | 12.82299629 | 13.9013457  | 61.08339708 |
| 6113 | 5153 | 8 | 0 | 6.038211359 | 16.50784802 | 62.50009562 |
| 6114 | 5154 | 8 | 0 | 3.392390108 | 17.37668214 | 63.91679416 |
| 6115 | 5155 | 8 | 0 | 10.75350738 | 17.37668214 | 63.91679416 |
| 6116 | 5156 | 8 | 0 | 8.107700279 | 15.63901392 | 63.91679416 |
| 6117 | 5157 | 8 | 0 | 1.32290119  | 15.63901392 | 63.91679416 |
| 6118 | 5158 | 8 | 0 | 26.96889408 | 16.50784802 | 62.50009562 |
| 6119 | 5159 | 8 | 0 | 20.18411357 | 16.50784802 | 62.50009562 |
| 6120 | 5160 | 8 | 0 | 17.53829232 | 17.37668214 | 63.91679416 |
| 6121 | 5161 | 8 | 0 | 24.89940959 | 17.37668214 | 63.91679416 |

|      |      |   |   |             |             |             |
|------|------|---|---|-------------|-------------|-------------|
| 6122 | 5162 | 8 | 0 | 22.25360249 | 15.63901392 | 63.91679416 |
| 6123 | 5163 | 8 | 0 | 15.4688034  | 15.63901392 | 63.91679416 |
| 6124 | 5164 | 8 | 0 | 12.82299629 | 16.50784802 | 62.50009562 |
| 6125 | 5165 | 8 | 0 | 6.038211359 | 19.11435034 | 63.91679416 |
| 6126 | 5166 | 8 | 0 | 3.392390108 | 19.98318446 | 65.3334927  |
| 6127 | 5167 | 8 | 0 | 10.75350738 | 19.98318446 | 65.3334927  |
| 6128 | 5168 | 8 | 0 | 8.107700279 | 18.24551624 | 65.3334927  |
| 6129 | 5169 | 8 | 0 | 1.32290119  | 18.24551624 | 65.3334927  |
| 6130 | 5170 | 8 | 0 | 26.96889408 | 19.11435034 | 63.91679416 |
| 6131 | 5171 | 8 | 0 | 20.18411357 | 19.11435034 | 63.91679416 |
| 6132 | 5172 | 8 | 0 | 17.53829232 | 19.98318446 | 65.3334927  |
| 6133 | 5173 | 8 | 0 | 24.89940959 | 19.98318446 | 65.3334927  |
| 6134 | 5174 | 8 | 0 | 22.25360249 | 18.24551624 | 65.3334927  |
| 6135 | 5175 | 8 | 0 | 15.4688034  | 18.24551624 | 65.3334927  |
| 6136 | 5176 | 8 | 0 | 12.82299629 | 19.11435034 | 63.91679416 |
| 6137 | 5177 | 8 | 0 | 6.038211359 | 21.72085266 | 65.3334927  |
| 6138 | 5178 | 8 | 0 | 3.392390108 | 22.58968677 | 66.75019124 |
| 6139 | 5179 | 8 | 0 | 10.75350738 | 22.58968677 | 66.75019124 |
| 6140 | 5180 | 8 | 0 | 8.107700279 | 20.85201856 | 66.75019124 |
| 6141 | 5181 | 8 | 0 | 1.32290119  | 20.85201856 | 66.75019124 |
| 6142 | 5182 | 8 | 0 | 26.96889408 | 21.72085266 | 65.3334927  |
| 6143 | 5183 | 8 | 0 | 20.18411357 | 21.72085266 | 65.3334927  |
| 6144 | 5184 | 8 | 0 | 17.53829232 | 22.58968677 | 66.75019124 |
| 6145 | 5185 | 8 | 0 | 24.89940959 | 22.58968677 | 66.75019124 |
| 6146 | 5186 | 8 | 0 | 22.25360249 | 20.85201856 | 66.75019124 |
| 6147 | 5187 | 8 | 0 | 15.4688034  | 20.85201856 | 66.75019124 |
| 6148 | 5188 | 8 | 0 | 12.82299629 | 21.72085266 | 65.3334927  |
| 6149 | 5189 | 8 | 0 | 6.038211359 | 24.32735498 | 66.75019124 |
| 6150 | 5190 | 8 | 0 | 3.392390108 | 25.19618909 | 68.16688978 |
| 6151 | 5191 | 8 | 0 | 10.75350738 | 25.19618909 | 68.16688978 |
| 6152 | 5192 | 8 | 0 | 8.107700279 | 23.45852088 | 68.16688978 |
| 6153 | 5193 | 8 | 0 | 1.32290119  | 23.45852088 | 68.16688978 |
| 6154 | 5194 | 8 | 0 | 26.96889408 | 24.32735498 | 66.75019124 |
| 6155 | 5195 | 8 | 0 | 20.18411357 | 24.32735498 | 66.75019124 |
| 6156 | 5196 | 8 | 0 | 17.53829232 | 25.19618909 | 68.16688978 |
| 6157 | 5197 | 8 | 0 | 24.89940959 | 25.19618909 | 68.16688978 |
| 6158 | 5198 | 8 | 0 | 22.25360249 | 23.45852088 | 68.16688978 |
| 6159 | 5199 | 8 | 0 | 15.4688034  | 23.45852088 | 68.16688978 |
| 6160 | 5200 | 8 | 0 | 12.82299629 | 24.32735498 | 66.75019124 |
| 6161 | 5201 | 8 | 0 | 6.038211359 | 26.9338573  | 68.16688978 |
| 6162 | 5202 | 8 | 0 | 3.392390108 | 27.80269141 | 69.58358832 |
| 6163 | 5203 | 8 | 0 | 10.75350738 | 27.80269141 | 69.58358832 |
| 6164 | 5204 | 8 | 0 | 8.107700279 | 26.0650232  | 69.58358832 |
| 6165 | 5205 | 8 | 0 | 1.32290119  | 26.0650232  | 69.58358832 |
| 6166 | 5206 | 8 | 0 | 26.96889408 | 26.9338573  | 68.16688978 |
| 6167 | 5207 | 8 | 0 | 20.18411357 | 26.9338573  | 68.16688978 |
| 6168 | 5208 | 8 | 0 | 17.53829232 | 27.80269141 | 69.58358832 |
| 6169 | 5209 | 8 | 0 | 24.89940959 | 27.80269141 | 69.58358832 |
| 6170 | 5210 | 8 | 0 | 22.25360249 | 26.0650232  | 69.58358832 |
| 6171 | 5211 | 8 | 0 | 15.4688034  | 26.0650232  | 69.58358832 |
| 6172 | 5212 | 8 | 0 | 12.82299629 | 26.9338573  | 68.16688978 |

|      |      |   |   |             |             |             |
|------|------|---|---|-------------|-------------|-------------|
| 6173 | 5213 | 8 | 0 | 6.038211359 | 29.54035962 | 69.58358832 |
| 6174 | 5214 | 8 | 0 | 3.392390108 | 30.40919373 | 71.00028686 |
| 6175 | 5215 | 8 | 0 | 10.75350738 | 30.40919373 | 71.00028686 |
| 6176 | 5216 | 8 | 0 | 8.107700279 | 28.67152552 | 71.00028686 |
| 6177 | 5217 | 8 | 0 | 1.32290119  | 28.67152552 | 71.00028686 |
| 6178 | 5218 | 8 | 0 | 26.96889408 | 29.54035962 | 69.58358832 |
| 6179 | 5219 | 8 | 0 | 20.18411357 | 29.54035962 | 69.58358832 |
| 6180 | 5220 | 8 | 0 | 17.53829232 | 30.40919373 | 71.00028686 |
| 6181 | 5221 | 8 | 0 | 24.89940959 | 30.40919373 | 71.00028686 |
| 6182 | 5222 | 8 | 0 | 22.25360249 | 28.67152552 | 71.00028686 |
| 6183 | 5223 | 8 | 0 | 15.4688034  | 28.67152552 | 71.00028686 |
| 6184 | 5224 | 8 | 0 | 12.82299629 | 29.54035962 | 69.58358832 |
| 6185 | 5225 | 8 | 0 | 3.392390108 | 12.1636775  | 58.25       |
| 6186 | 5226 | 8 | 0 | 10.75350738 | 12.1636775  | 58.25       |
| 6187 | 5227 | 8 | 0 | 8.107700279 | 10.42600928 | 58.25       |
| 6188 | 5228 | 8 | 0 | 1.32290119  | 10.42600928 | 58.25       |
| 6189 | 5229 | 8 | 0 | 17.53829232 | 12.1636775  | 58.25       |
| 6190 | 5230 | 8 | 0 | 24.89940959 | 12.1636775  | 58.25       |
| 6191 | 5231 | 8 | 0 | 22.25360249 | 10.42600928 | 58.25       |
| 6192 | 5232 | 8 | 0 | 15.4688034  | 10.42600928 | 58.25       |
| 6193 | 5233 | 8 | 0 | 6.038211359 | 13.9013457  | 58.25       |
| 6194 | 5234 | 8 | 0 | 3.392390108 | 14.77017982 | 59.66669854 |
| 6195 | 5235 | 8 | 0 | 10.75350738 | 14.77017982 | 59.66669854 |
| 6196 | 5236 | 8 | 0 | 8.107700279 | 13.0325116  | 59.66669854 |
| 6197 | 5237 | 8 | 0 | 1.32290119  | 13.0325116  | 59.66669854 |
| 6198 | 5238 | 8 | 0 | 26.96889408 | 13.9013457  | 58.25       |
| 6199 | 5239 | 8 | 0 | 20.18411357 | 13.9013457  | 58.25       |
| 6200 | 5240 | 8 | 0 | 17.53829232 | 14.77017982 | 59.66669854 |
| 6201 | 5241 | 8 | 0 | 24.89940959 | 14.77017982 | 59.66669854 |
| 6202 | 5242 | 8 | 0 | 22.25360249 | 13.0325116  | 59.66669854 |
| 6203 | 5243 | 8 | 0 | 15.4688034  | 13.0325116  | 59.66669854 |
| 6204 | 5244 | 8 | 0 | 12.82299629 | 13.9013457  | 58.25       |
| 6205 | 5245 | 8 | 0 | 6.038211359 | 16.50784802 | 59.66669854 |
| 6206 | 5246 | 8 | 0 | 3.392390108 | 17.37668214 | 61.08339708 |
| 6207 | 5247 | 8 | 0 | 10.75350738 | 17.37668214 | 61.08339708 |
| 6208 | 5248 | 8 | 0 | 8.107700279 | 15.63901392 | 61.08339708 |
| 6209 | 5249 | 8 | 0 | 1.32290119  | 15.63901392 | 61.08339708 |
| 6210 | 5250 | 8 | 0 | 26.96889408 | 16.50784802 | 59.66669854 |
| 6211 | 5251 | 8 | 0 | 20.18411357 | 16.50784802 | 59.66669854 |
| 6212 | 5252 | 8 | 0 | 17.53829232 | 17.37668214 | 61.08339708 |
| 6213 | 5253 | 8 | 0 | 24.89940959 | 17.37668214 | 61.08339708 |
| 6214 | 5254 | 8 | 0 | 22.25360249 | 15.63901392 | 61.08339708 |
| 6215 | 5255 | 8 | 0 | 15.4688034  | 15.63901392 | 61.08339708 |
| 6216 | 5256 | 8 | 0 | 12.82299629 | 16.50784802 | 59.66669854 |
| 6217 | 5257 | 8 | 0 | 6.038211359 | 19.11435034 | 61.08339708 |
| 6218 | 5258 | 8 | 0 | 3.392390108 | 19.98318446 | 62.50009562 |
| 6219 | 5259 | 8 | 0 | 10.75350738 | 19.98318446 | 62.50009562 |
| 6220 | 5260 | 8 | 0 | 8.107700279 | 18.24551624 | 62.50009562 |
| 6221 | 5261 | 8 | 0 | 1.32290119  | 18.24551624 | 62.50009562 |
| 6222 | 5262 | 8 | 0 | 26.96889408 | 19.11435034 | 61.08339708 |
| 6223 | 5263 | 8 | 0 | 20.18411357 | 19.11435034 | 61.08339708 |

|      |      |   |   |             |             |             |
|------|------|---|---|-------------|-------------|-------------|
| 6224 | 5264 | 8 | 0 | 17.53829232 | 19.98318446 | 62.50009562 |
| 6225 | 5265 | 8 | 0 | 24.89940959 | 19.98318446 | 62.50009562 |
| 6226 | 5266 | 8 | 0 | 22.25360249 | 18.24551624 | 62.50009562 |
| 6227 | 5267 | 8 | 0 | 15.4688034  | 18.24551624 | 62.50009562 |
| 6228 | 5268 | 8 | 0 | 12.82299629 | 19.11435034 | 61.08339708 |
| 6229 | 5269 | 8 | 0 | 6.038211359 | 21.72085266 | 62.50009562 |
| 6230 | 5270 | 8 | 0 | 3.392390108 | 22.58968677 | 63.91679416 |
| 6231 | 5271 | 8 | 0 | 10.75350738 | 22.58968677 | 63.91679416 |
| 6232 | 5272 | 8 | 0 | 8.107700279 | 20.85201856 | 63.91679416 |
| 6233 | 5273 | 8 | 0 | 1.32290119  | 20.85201856 | 63.91679416 |
| 6234 | 5274 | 8 | 0 | 26.96889408 | 21.72085266 | 62.50009562 |
| 6235 | 5275 | 8 | 0 | 20.18411357 | 21.72085266 | 62.50009562 |
| 6236 | 5276 | 8 | 0 | 17.53829232 | 22.58968677 | 63.91679416 |
| 6237 | 5277 | 8 | 0 | 24.89940959 | 22.58968677 | 63.91679416 |
| 6238 | 5278 | 8 | 0 | 22.25360249 | 20.85201856 | 63.91679416 |
| 6239 | 5279 | 8 | 0 | 15.4688034  | 20.85201856 | 63.91679416 |
| 6240 | 5280 | 8 | 0 | 12.82299629 | 21.72085266 | 62.50009562 |
| 6241 | 5281 | 8 | 0 | 6.038211359 | 24.32735498 | 63.91679416 |
| 6242 | 5282 | 8 | 0 | 3.392390108 | 25.19618909 | 65.3334927  |
| 6243 | 5283 | 8 | 0 | 10.75350738 | 25.19618909 | 65.3334927  |
| 6244 | 5284 | 8 | 0 | 8.107700279 | 23.45852088 | 65.3334927  |
| 6245 | 5285 | 8 | 0 | 1.32290119  | 23.45852088 | 65.3334927  |
| 6246 | 5286 | 8 | 0 | 26.96889408 | 24.32735498 | 63.91679416 |
| 6247 | 5287 | 8 | 0 | 20.18411357 | 24.32735498 | 63.91679416 |
| 6248 | 5288 | 8 | 0 | 17.53829232 | 25.19618909 | 65.3334927  |
| 6249 | 5289 | 8 | 0 | 24.89940959 | 25.19618909 | 65.3334927  |
| 6250 | 5290 | 8 | 0 | 22.25360249 | 23.45852088 | 65.3334927  |
| 6251 | 5291 | 8 | 0 | 15.4688034  | 23.45852088 | 65.3334927  |
| 6252 | 5292 | 8 | 0 | 12.82299629 | 24.32735498 | 63.91679416 |
| 6253 | 5293 | 8 | 0 | 6.038211359 | 26.9338573  | 65.3334927  |
| 6254 | 5294 | 8 | 0 | 3.392390108 | 27.80269141 | 66.75019124 |
| 6255 | 5295 | 8 | 0 | 10.75350738 | 27.80269141 | 66.75019124 |
| 6256 | 5296 | 8 | 0 | 8.107700279 | 26.0650232  | 66.75019124 |
| 6257 | 5297 | 8 | 0 | 1.32290119  | 26.0650232  | 66.75019124 |
| 6258 | 5298 | 8 | 0 | 26.96889408 | 26.9338573  | 65.3334927  |
| 6259 | 5299 | 8 | 0 | 20.18411357 | 26.9338573  | 65.3334927  |
| 6260 | 5300 | 8 | 0 | 17.53829232 | 27.80269141 | 66.75019124 |
| 6261 | 5301 | 8 | 0 | 24.89940959 | 27.80269141 | 66.75019124 |
| 6262 | 5302 | 8 | 0 | 22.25360249 | 26.0650232  | 66.75019124 |
| 6263 | 5303 | 8 | 0 | 15.4688034  | 26.0650232  | 66.75019124 |
| 6264 | 5304 | 8 | 0 | 12.82299629 | 26.9338573  | 65.3334927  |
| 6265 | 5305 | 8 | 0 | 6.038211359 | 29.54035962 | 66.75019124 |
| 6266 | 5306 | 8 | 0 | 3.392390108 | 30.40919373 | 68.16688978 |
| 6267 | 5307 | 8 | 0 | 10.75350738 | 30.40919373 | 68.16688978 |
| 6268 | 5308 | 8 | 0 | 8.107700279 | 28.67152552 | 68.16688978 |
| 6269 | 5309 | 8 | 0 | 1.32290119  | 28.67152552 | 68.16688978 |
| 6270 | 5310 | 8 | 0 | 26.96889408 | 29.54035962 | 66.75019124 |
| 6271 | 5311 | 8 | 0 | 20.18411357 | 29.54035962 | 66.75019124 |
| 6272 | 5312 | 8 | 0 | 17.53829232 | 30.40919373 | 68.16688978 |
| 6273 | 5313 | 8 | 0 | 24.89940959 | 30.40919373 | 68.16688978 |
| 6274 | 5314 | 8 | 0 | 22.25360249 | 28.67152552 | 68.16688978 |

|      |      |   |   |             |             |             |
|------|------|---|---|-------------|-------------|-------------|
| 6275 | 5315 | 8 | 0 | 15.4688034  | 28.67152552 | 68.16688978 |
| 6276 | 5316 | 8 | 0 | 12.82299629 | 29.54035962 | 66.75019124 |
| 6277 | 5317 | 8 | 0 | 3.392390108 | 17.37668214 | 58.25       |
| 6278 | 5318 | 8 | 0 | 10.75350738 | 17.37668214 | 58.25       |
| 6279 | 5319 | 8 | 0 | 8.107700279 | 15.63901392 | 58.25       |
| 6280 | 5320 | 8 | 0 | 1.32290119  | 15.63901392 | 58.25       |
| 6281 | 5321 | 8 | 0 | 17.53829232 | 17.37668214 | 58.25       |
| 6282 | 5322 | 8 | 0 | 24.89940959 | 17.37668214 | 58.25       |
| 6283 | 5323 | 8 | 0 | 22.25360249 | 15.63901392 | 58.25       |
| 6284 | 5324 | 8 | 0 | 15.4688034  | 15.63901392 | 58.25       |
| 6285 | 5325 | 8 | 0 | 6.038211359 | 19.11435034 | 58.25       |
| 6286 | 5326 | 8 | 0 | 3.392390108 | 19.98318446 | 59.66669854 |
| 6287 | 5327 | 8 | 0 | 10.75350738 | 19.98318446 | 59.66669854 |
| 6288 | 5328 | 8 | 0 | 8.107700279 | 18.24551624 | 59.66669854 |
| 6289 | 5329 | 8 | 0 | 1.32290119  | 18.24551624 | 59.66669854 |
| 6290 | 5330 | 8 | 0 | 26.96889408 | 19.11435034 | 58.25       |
| 6291 | 5331 | 8 | 0 | 20.18411357 | 19.11435034 | 58.25       |
| 6292 | 5332 | 8 | 0 | 17.53829232 | 19.98318446 | 59.66669854 |
| 6293 | 5333 | 8 | 0 | 24.89940959 | 19.98318446 | 59.66669854 |
| 6294 | 5334 | 8 | 0 | 22.25360249 | 18.24551624 | 59.66669854 |
| 6295 | 5335 | 8 | 0 | 15.4688034  | 18.24551624 | 59.66669854 |
| 6296 | 5336 | 8 | 0 | 12.82299629 | 19.11435034 | 58.25       |
| 6297 | 5337 | 8 | 0 | 6.038211359 | 21.72085266 | 59.66669854 |
| 6298 | 5338 | 8 | 0 | 3.392390108 | 22.58968677 | 61.08339708 |
| 6299 | 5339 | 8 | 0 | 10.75350738 | 22.58968677 | 61.08339708 |
| 6300 | 5340 | 8 | 0 | 8.107700279 | 20.85201856 | 61.08339708 |
| 6301 | 5341 | 8 | 0 | 1.32290119  | 20.85201856 | 61.08339708 |
| 6302 | 5342 | 8 | 0 | 26.96889408 | 21.72085266 | 59.66669854 |
| 6303 | 5343 | 8 | 0 | 20.18411357 | 21.72085266 | 59.66669854 |
| 6304 | 5344 | 8 | 0 | 17.53829232 | 22.58968677 | 61.08339708 |
| 6305 | 5345 | 8 | 0 | 24.89940959 | 22.58968677 | 61.08339708 |
| 6306 | 5346 | 8 | 0 | 22.25360249 | 20.85201856 | 61.08339708 |
| 6307 | 5347 | 8 | 0 | 15.4688034  | 20.85201856 | 61.08339708 |
| 6308 | 5348 | 8 | 0 | 12.82299629 | 21.72085266 | 59.66669854 |
| 6309 | 5349 | 8 | 0 | 6.038211359 | 24.32735498 | 61.08339708 |
| 6310 | 5350 | 8 | 0 | 3.392390108 | 25.19618909 | 62.50009562 |
| 6311 | 5351 | 8 | 0 | 10.75350738 | 25.19618909 | 62.50009562 |
| 6312 | 5352 | 8 | 0 | 8.107700279 | 23.45852088 | 62.50009562 |
| 6313 | 5353 | 8 | 0 | 1.32290119  | 23.45852088 | 62.50009562 |
| 6314 | 5354 | 8 | 0 | 26.96889408 | 24.32735498 | 61.08339708 |
| 6315 | 5355 | 8 | 0 | 20.18411357 | 24.32735498 | 61.08339708 |
| 6316 | 5356 | 8 | 0 | 17.53829232 | 25.19618909 | 62.50009562 |
| 6317 | 5357 | 8 | 0 | 24.89940959 | 25.19618909 | 62.50009562 |
| 6318 | 5358 | 8 | 0 | 22.25360249 | 23.45852088 | 62.50009562 |
| 6319 | 5359 | 8 | 0 | 15.4688034  | 23.45852088 | 62.50009562 |
| 6320 | 5360 | 8 | 0 | 12.82299629 | 24.32735498 | 61.08339708 |
| 6321 | 5361 | 8 | 0 | 6.038211359 | 26.9338573  | 62.50009562 |
| 6322 | 5362 | 8 | 0 | 3.392390108 | 27.80269141 | 63.91679416 |
| 6323 | 5363 | 8 | 0 | 10.75350738 | 27.80269141 | 63.91679416 |
| 6324 | 5364 | 8 | 0 | 8.107700279 | 26.0650232  | 63.91679416 |
| 6325 | 5365 | 8 | 0 | 1.32290119  | 26.0650232  | 63.91679416 |

|      |      |   |   |             |             |             |
|------|------|---|---|-------------|-------------|-------------|
| 6326 | 5366 | 8 | 0 | 26.96889408 | 26.9338573  | 62.50009562 |
| 6327 | 5367 | 8 | 0 | 20.18411357 | 26.9338573  | 62.50009562 |
| 6328 | 5368 | 8 | 0 | 17.53829232 | 27.80269141 | 63.91679416 |
| 6329 | 5369 | 8 | 0 | 24.89940959 | 27.80269141 | 63.91679416 |
| 6330 | 5370 | 8 | 0 | 22.25360249 | 26.0650232  | 63.91679416 |
| 6331 | 5371 | 8 | 0 | 15.4688034  | 26.0650232  | 63.91679416 |
| 6332 | 5372 | 8 | 0 | 12.82299629 | 26.9338573  | 62.50009562 |
| 6333 | 5373 | 8 | 0 | 6.038211359 | 29.54035962 | 63.91679416 |
| 6334 | 5374 | 8 | 0 | 3.392390108 | 30.40919373 | 65.3334927  |
| 6335 | 5375 | 8 | 0 | 10.75350738 | 30.40919373 | 65.3334927  |
| 6336 | 5376 | 8 | 0 | 8.107700279 | 28.67152552 | 65.3334927  |
| 6337 | 5377 | 8 | 0 | 1.32290119  | 28.67152552 | 65.3334927  |
| 6338 | 5378 | 8 | 0 | 26.96889408 | 29.54035962 | 63.91679416 |
| 6339 | 5379 | 8 | 0 | 20.18411357 | 29.54035962 | 63.91679416 |
| 6340 | 5380 | 8 | 0 | 17.53829232 | 30.40919373 | 65.3334927  |
| 6341 | 5381 | 8 | 0 | 24.89940959 | 30.40919373 | 65.3334927  |
| 6342 | 5382 | 8 | 0 | 22.25360249 | 28.67152552 | 65.3334927  |
| 6343 | 5383 | 8 | 0 | 15.4688034  | 28.67152552 | 65.3334927  |
| 6344 | 5384 | 8 | 0 | 12.82299629 | 29.54035962 | 63.91679416 |
| 6345 | 5385 | 8 | 0 | 3.392390108 | 22.58968677 | 58.25       |
| 6346 | 5386 | 8 | 0 | 10.75350738 | 22.58968677 | 58.25       |
| 6347 | 5387 | 8 | 0 | 8.107700279 | 20.85201856 | 58.25       |
| 6348 | 5388 | 8 | 0 | 1.32290119  | 20.85201856 | 58.25       |
| 6349 | 5389 | 8 | 0 | 17.53829232 | 22.58968677 | 58.25       |
| 6350 | 5390 | 8 | 0 | 24.89940959 | 22.58968677 | 58.25       |
| 6351 | 5391 | 8 | 0 | 22.25360249 | 20.85201856 | 58.25       |
| 6352 | 5392 | 8 | 0 | 15.4688034  | 20.85201856 | 58.25       |
| 6353 | 5393 | 8 | 0 | 6.038211359 | 24.32735498 | 58.25       |
| 6354 | 5394 | 8 | 0 | 3.392390108 | 25.19618909 | 59.66669854 |
| 6355 | 5395 | 8 | 0 | 10.75350738 | 25.19618909 | 59.66669854 |
| 6356 | 5396 | 8 | 0 | 8.107700279 | 23.45852088 | 59.66669854 |
| 6357 | 5397 | 8 | 0 | 1.32290119  | 23.45852088 | 59.66669854 |
| 6358 | 5398 | 8 | 0 | 26.96889408 | 24.32735498 | 58.25       |
| 6359 | 5399 | 8 | 0 | 20.18411357 | 24.32735498 | 58.25       |
| 6360 | 5400 | 8 | 0 | 17.53829232 | 25.19618909 | 59.66669854 |
| 6361 | 5401 | 8 | 0 | 24.89940959 | 25.19618909 | 59.66669854 |
| 6362 | 5402 | 8 | 0 | 22.25360249 | 23.45852088 | 59.66669854 |
| 6363 | 5403 | 8 | 0 | 15.4688034  | 23.45852088 | 59.66669854 |
| 6364 | 5404 | 8 | 0 | 12.82299629 | 24.32735498 | 58.25       |
| 6365 | 5405 | 8 | 0 | 6.038211359 | 26.9338573  | 59.66669854 |
| 6366 | 5406 | 8 | 0 | 3.392390108 | 27.80269141 | 61.08339708 |
| 6367 | 5407 | 8 | 0 | 10.75350738 | 27.80269141 | 61.08339708 |
| 6368 | 5408 | 8 | 0 | 8.107700279 | 26.0650232  | 61.08339708 |
| 6369 | 5409 | 8 | 0 | 1.32290119  | 26.0650232  | 61.08339708 |
| 6370 | 5410 | 8 | 0 | 26.96889408 | 26.9338573  | 59.66669854 |
| 6371 | 5411 | 8 | 0 | 20.18411357 | 26.9338573  | 59.66669854 |
| 6372 | 5412 | 8 | 0 | 17.53829232 | 27.80269141 | 61.08339708 |
| 6373 | 5413 | 8 | 0 | 24.89940959 | 27.80269141 | 61.08339708 |
| 6374 | 5414 | 8 | 0 | 22.25360249 | 26.0650232  | 61.08339708 |
| 6375 | 5415 | 8 | 0 | 15.4688034  | 26.0650232  | 61.08339708 |
| 6376 | 5416 | 8 | 0 | 12.82299629 | 26.9338573  | 59.66669854 |

|      |      |   |   |             |             |             |
|------|------|---|---|-------------|-------------|-------------|
| 6377 | 5417 | 8 | 0 | 6.038211359 | 29.54035962 | 61.08339708 |
| 6378 | 5418 | 8 | 0 | 3.392390108 | 30.40919373 | 62.50009562 |
| 6379 | 5419 | 8 | 0 | 10.75350738 | 30.40919373 | 62.50009562 |
| 6380 | 5420 | 8 | 0 | 8.107700279 | 28.67152552 | 62.50009562 |
| 6381 | 5421 | 8 | 0 | 1.32290119  | 28.67152552 | 62.50009562 |
| 6382 | 5422 | 8 | 0 | 26.96889408 | 29.54035962 | 61.08339708 |
| 6383 | 5423 | 8 | 0 | 20.18411357 | 29.54035962 | 61.08339708 |
| 6384 | 5424 | 8 | 0 | 17.53829232 | 30.40919373 | 62.50009562 |
| 6385 | 5425 | 8 | 0 | 24.89940959 | 30.40919373 | 62.50009562 |
| 6386 | 5426 | 8 | 0 | 22.25360249 | 28.67152552 | 62.50009562 |
| 6387 | 5427 | 8 | 0 | 15.4688034  | 28.67152552 | 62.50009562 |
| 6388 | 5428 | 8 | 0 | 12.82299629 | 29.54035962 | 61.08339708 |
| 6389 | 5429 | 8 | 0 | 3.392390108 | 27.80269141 | 58.25       |
| 6390 | 5430 | 8 | 0 | 10.75350738 | 27.80269141 | 58.25       |
| 6391 | 5431 | 8 | 0 | 8.107700279 | 26.0650232  | 58.25       |
| 6392 | 5432 | 8 | 0 | 1.32290119  | 26.0650232  | 58.25       |
| 6393 | 5433 | 8 | 0 | 17.53829232 | 27.80269141 | 58.25       |
| 6394 | 5434 | 8 | 0 | 24.89940959 | 27.80269141 | 58.25       |
| 6395 | 5435 | 8 | 0 | 22.25360249 | 26.0650232  | 58.25       |
| 6396 | 5436 | 8 | 0 | 15.4688034  | 26.0650232  | 58.25       |
| 6397 | 5437 | 8 | 0 | 6.038211359 | 29.54035962 | 58.25       |
| 6398 | 5438 | 8 | 0 | 3.392390108 | 30.40919373 | 59.66669854 |
| 6399 | 5439 | 8 | 0 | 10.75350738 | 30.40919373 | 59.66669854 |
| 6400 | 5440 | 8 | 0 | 8.107700279 | 28.67152552 | 59.66669854 |
| 6401 | 5441 | 8 | 0 | 1.32290119  | 28.67152552 | 59.66669854 |
| 6402 | 5442 | 8 | 0 | 26.96889408 | 29.54035962 | 58.25       |
| 6403 | 5443 | 8 | 0 | 20.18411357 | 29.54035962 | 58.25       |
| 6404 | 5444 | 8 | 0 | 17.53829232 | 30.40919373 | 59.66669854 |
| 6405 | 5445 | 8 | 0 | 24.89940959 | 30.40919373 | 59.66669854 |
| 6406 | 5446 | 8 | 0 | 22.25360249 | 28.67152552 | 59.66669854 |
| 6407 | 5447 | 8 | 0 | 15.4688034  | 28.67152552 | 59.66669854 |
| 6408 | 5448 | 8 | 0 | 12.82299629 | 29.54035962 | 58.25       |
| 6409 | 5449 | 9 | 0 | 0           | 0           | 89          |
| 6410 | 5450 | 9 | 0 | 0           | 1.954875    | 90.954875   |
| 6411 | 5451 | 9 | 0 | 2.020842857 | 0           | 90.954875   |
| 6412 | 5452 | 9 | 0 | 2.020842857 | 1.954875    | 89          |
| 6413 | 5453 | 9 | 0 | 0           | 0           | 92.90975    |
| 6414 | 5454 | 9 | 0 | 0           | 1.954875    | 94.864625   |
| 6415 | 5455 | 9 | 0 | 2.020842857 | 0           | 94.864625   |
| 6416 | 5456 | 9 | 0 | 2.020842857 | 1.954875    | 92.90975    |
| 6417 | 5457 | 9 | 0 | 0           | 0           | 96.8195     |
| 6418 | 5458 | 9 | 0 | 0           | 1.954875    | 98.774375   |
| 6419 | 5459 | 9 | 0 | 2.020842857 | 0           | 98.774375   |
| 6420 | 5460 | 9 | 0 | 2.020842857 | 1.954875    | 96.8195     |
| 6421 | 5461 | 9 | 0 | 0           | 3.90975     | 89          |
| 6422 | 5462 | 9 | 0 | 0           | 5.864625    | 90.954875   |
| 6423 | 5463 | 9 | 0 | 2.020842857 | 3.90975     | 90.954875   |
| 6424 | 5464 | 9 | 0 | 2.020842857 | 5.864625    | 89          |
| 6425 | 5465 | 9 | 0 | 0           | 3.90975     | 92.90975    |
| 6426 | 5466 | 9 | 0 | 0           | 5.864625    | 94.864625   |
| 6427 | 5467 | 9 | 0 | 2.020842857 | 3.90975     | 94.864625   |

|      |      |   |   |             |           |           |
|------|------|---|---|-------------|-----------|-----------|
| 6428 | 5468 | 9 | 0 | 2.020842857 | 5.864625  | 92.90975  |
| 6429 | 5469 | 9 | 0 | 0           | 3.90975   | 96.8195   |
| 6430 | 5470 | 9 | 0 | 0           | 5.864625  | 98.774375 |
| 6431 | 5471 | 9 | 0 | 2.020842857 | 3.90975   | 98.774375 |
| 6432 | 5472 | 9 | 0 | 2.020842857 | 5.864625  | 96.8195   |
| 6433 | 5473 | 9 | 0 | 0           | 7.8195    | 89        |
| 6434 | 5474 | 9 | 0 | 0           | 9.774375  | 90.954875 |
| 6435 | 5475 | 9 | 0 | 2.020842857 | 7.8195    | 90.954875 |
| 6436 | 5476 | 9 | 0 | 2.020842857 | 9.774375  | 89        |
| 6437 | 5477 | 9 | 0 | 0           | 7.8195    | 92.90975  |
| 6438 | 5478 | 9 | 0 | 0           | 9.774375  | 94.864625 |
| 6439 | 5479 | 9 | 0 | 2.020842857 | 7.8195    | 94.864625 |
| 6440 | 5480 | 9 | 0 | 2.020842857 | 9.774375  | 92.90975  |
| 6441 | 5481 | 9 | 0 | 0           | 7.8195    | 96.8195   |
| 6442 | 5482 | 9 | 0 | 0           | 9.774375  | 98.774375 |
| 6443 | 5483 | 9 | 0 | 2.020842857 | 7.8195    | 98.774375 |
| 6444 | 5484 | 9 | 0 | 2.020842857 | 9.774375  | 96.8195   |
| 6445 | 5485 | 9 | 0 | 0           | 11.72925  | 89        |
| 6446 | 5486 | 9 | 0 | 0           | 13.684125 | 90.954875 |
| 6447 | 5487 | 9 | 0 | 2.020842857 | 11.72925  | 90.954875 |
| 6448 | 5488 | 9 | 0 | 2.020842857 | 13.684125 | 89        |
| 6449 | 5489 | 9 | 0 | 0           | 11.72925  | 92.90975  |
| 6450 | 5490 | 9 | 0 | 0           | 13.684125 | 94.864625 |
| 6451 | 5491 | 9 | 0 | 2.020842857 | 11.72925  | 94.864625 |
| 6452 | 5492 | 9 | 0 | 2.020842857 | 13.684125 | 92.90975  |
| 6453 | 5493 | 9 | 0 | 0           | 11.72925  | 96.8195   |
| 6454 | 5494 | 9 | 0 | 0           | 13.684125 | 98.774375 |
| 6455 | 5495 | 9 | 0 | 2.020842857 | 11.72925  | 98.774375 |
| 6456 | 5496 | 9 | 0 | 2.020842857 | 13.684125 | 96.8195   |
| 6457 | 5497 | 9 | 0 | 0           | 15.639    | 89        |
| 6458 | 5498 | 9 | 0 | 0           | 17.593875 | 90.954875 |
| 6459 | 5499 | 9 | 0 | 2.020842857 | 15.639    | 90.954875 |
| 6460 | 5500 | 9 | 0 | 2.020842857 | 17.593875 | 89        |
| 6461 | 5501 | 9 | 0 | 0           | 15.639    | 92.90975  |
| 6462 | 5502 | 9 | 0 | 0           | 17.593875 | 94.864625 |
| 6463 | 5503 | 9 | 0 | 2.020842857 | 15.639    | 94.864625 |
| 6464 | 5504 | 9 | 0 | 2.020842857 | 17.593875 | 92.90975  |
| 6465 | 5505 | 9 | 0 | 0           | 15.639    | 96.8195   |
| 6466 | 5506 | 9 | 0 | 0           | 17.593875 | 98.774375 |
| 6467 | 5507 | 9 | 0 | 2.020842857 | 15.639    | 98.774375 |
| 6468 | 5508 | 9 | 0 | 2.020842857 | 17.593875 | 96.8195   |
| 6469 | 5509 | 9 | 0 | 0           | 19.54875  | 89        |
| 6470 | 5510 | 9 | 0 | 0           | 21.503625 | 90.954875 |
| 6471 | 5511 | 9 | 0 | 2.020842857 | 19.54875  | 90.954875 |
| 6472 | 5512 | 9 | 0 | 2.020842857 | 21.503625 | 89        |
| 6473 | 5513 | 9 | 0 | 0           | 19.54875  | 92.90975  |
| 6474 | 5514 | 9 | 0 | 0           | 21.503625 | 94.864625 |
| 6475 | 5515 | 9 | 0 | 2.020842857 | 19.54875  | 94.864625 |
| 6476 | 5516 | 9 | 0 | 2.020842857 | 21.503625 | 92.90975  |
| 6477 | 5517 | 9 | 0 | 0           | 19.54875  | 96.8195   |
| 6478 | 5518 | 9 | 0 | 0           | 21.503625 | 98.774375 |



|      |      |   |   |             |           |           |
|------|------|---|---|-------------|-----------|-----------|
| 6479 | 5519 | 9 | 0 | 2.020842857 | 19.54875  | 98.774375 |
| 6480 | 5520 | 9 | 0 | 2.020842857 | 21.503625 | 96.8195   |
| 6481 | 5521 | 9 | 0 | 0           | 23.4585   | 89        |
| 6482 | 5522 | 9 | 0 | 0           | 25.413375 | 90.954875 |
| 6483 | 5523 | 9 | 0 | 2.020842857 | 23.4585   | 90.954875 |
| 6484 | 5524 | 9 | 0 | 2.020842857 | 25.413375 | 89        |
| 6485 | 5525 | 9 | 0 | 0           | 23.4585   | 92.90975  |
| 6486 | 5526 | 9 | 0 | 0           | 25.413375 | 94.864625 |
| 6487 | 5527 | 9 | 0 | 2.020842857 | 23.4585   | 94.864625 |
| 6488 | 5528 | 9 | 0 | 2.020842857 | 25.413375 | 92.90975  |
| 6489 | 5529 | 9 | 0 | 0           | 23.4585   | 96.8195   |
| 6490 | 5530 | 9 | 0 | 0           | 25.413375 | 98.774375 |
| 6491 | 5531 | 9 | 0 | 2.020842857 | 23.4585   | 98.774375 |
| 6492 | 5532 | 9 | 0 | 2.020842857 | 25.413375 | 96.8195   |
| 6493 | 5533 | 9 | 0 | 0           | 27.36825  | 89        |
| 6494 | 5534 | 9 | 0 | 0           | 29.323125 | 90.954875 |
| 6495 | 5535 | 9 | 0 | 2.020842857 | 27.36825  | 90.954875 |
| 6496 | 5536 | 9 | 0 | 2.020842857 | 29.323125 | 89        |
| 6497 | 5537 | 9 | 0 | 0           | 27.36825  | 92.90975  |
| 6498 | 5538 | 9 | 0 | 0           | 29.323125 | 94.864625 |
| 6499 | 5539 | 9 | 0 | 2.020842857 | 27.36825  | 94.864625 |
| 6500 | 5540 | 9 | 0 | 2.020842857 | 29.323125 | 92.90975  |
| 6501 | 5541 | 9 | 0 | 0           | 27.36825  | 96.8195   |
| 6502 | 5542 | 9 | 0 | 0           | 29.323125 | 98.774375 |
| 6503 | 5543 | 9 | 0 | 2.020842857 | 27.36825  | 98.774375 |
| 6504 | 5544 | 9 | 0 | 2.020842857 | 29.323125 | 96.8195   |
| 6505 | 5545 | 9 | 0 | 4.041685714 | 0         | 89        |
| 6506 | 5546 | 9 | 0 | 4.041685714 | 1.954875  | 90.954875 |
| 6507 | 5547 | 9 | 0 | 6.062528571 | 0         | 90.954875 |
| 6508 | 5548 | 9 | 0 | 6.062528571 | 1.954875  | 89        |
| 6509 | 5549 | 9 | 0 | 4.041685714 | 0         | 92.90975  |
| 6510 | 5550 | 9 | 0 | 4.041685714 | 1.954875  | 94.864625 |
| 6511 | 5551 | 9 | 0 | 6.062528571 | 0         | 94.864625 |
| 6512 | 5552 | 9 | 0 | 6.062528571 | 1.954875  | 92.90975  |
| 6513 | 5553 | 9 | 0 | 4.041685714 | 0         | 96.8195   |
| 6514 | 5554 | 9 | 0 | 4.041685714 | 1.954875  | 98.774375 |
| 6515 | 5555 | 9 | 0 | 6.062528571 | 0         | 98.774375 |
| 6516 | 5556 | 9 | 0 | 6.062528571 | 1.954875  | 96.8195   |
| 6517 | 5557 | 9 | 0 | 4.041685714 | 3.90975   | 89        |
| 6518 | 5558 | 9 | 0 | 4.041685714 | 5.864625  | 90.954875 |
| 6519 | 5559 | 9 | 0 | 6.062528571 | 3.90975   | 90.954875 |
| 6520 | 5560 | 9 | 0 | 6.062528571 | 5.864625  | 89        |
| 6521 | 5561 | 9 | 0 | 4.041685714 | 3.90975   | 92.90975  |
| 6522 | 5562 | 9 | 0 | 4.041685714 | 5.864625  | 94.864625 |
| 6523 | 5563 | 9 | 0 | 6.062528571 | 3.90975   | 94.864625 |
| 6524 | 5564 | 9 | 0 | 6.062528571 | 5.864625  | 92.90975  |
| 6525 | 5565 | 9 | 0 | 4.041685714 | 3.90975   | 96.8195   |
| 6526 | 5566 | 9 | 0 | 4.041685714 | 5.864625  | 98.774375 |
| 6527 | 5567 | 9 | 0 | 6.062528571 | 3.90975   | 98.774375 |
| 6528 | 5568 | 9 | 0 | 6.062528571 | 5.864625  | 96.8195   |
| 6529 | 5569 | 9 | 0 | 4.041685714 | 7.8195    | 89        |

|      |      |   |   |             |           |           |
|------|------|---|---|-------------|-----------|-----------|
| 6530 | 5570 | 9 | 0 | 4.041685714 | 9.774375  | 90.954875 |
| 6531 | 5571 | 9 | 0 | 6.062528571 | 7.8195    | 90.954875 |
| 6532 | 5572 | 9 | 0 | 6.062528571 | 9.774375  | 89        |
| 6533 | 5573 | 9 | 0 | 4.041685714 | 7.8195    | 92.90975  |
| 6534 | 5574 | 9 | 0 | 4.041685714 | 9.774375  | 94.864625 |
| 6535 | 5575 | 9 | 0 | 6.062528571 | 7.8195    | 94.864625 |
| 6536 | 5576 | 9 | 0 | 6.062528571 | 9.774375  | 92.90975  |
| 6537 | 5577 | 9 | 0 | 4.041685714 | 7.8195    | 96.8195   |
| 6538 | 5578 | 9 | 0 | 4.041685714 | 9.774375  | 98.774375 |
| 6539 | 5579 | 9 | 0 | 6.062528571 | 7.8195    | 98.774375 |
| 6540 | 5580 | 9 | 0 | 6.062528571 | 9.774375  | 96.8195   |
| 6541 | 5581 | 9 | 0 | 4.041685714 | 11.72925  | 89        |
| 6542 | 5582 | 9 | 0 | 4.041685714 | 13.684125 | 90.954875 |
| 6543 | 5583 | 9 | 0 | 6.062528571 | 11.72925  | 90.954875 |
| 6544 | 5584 | 9 | 0 | 6.062528571 | 13.684125 | 89        |
| 6545 | 5585 | 9 | 0 | 4.041685714 | 11.72925  | 92.90975  |
| 6546 | 5586 | 9 | 0 | 4.041685714 | 13.684125 | 94.864625 |
| 6547 | 5587 | 9 | 0 | 6.062528571 | 11.72925  | 94.864625 |
| 6548 | 5588 | 9 | 0 | 6.062528571 | 13.684125 | 92.90975  |
| 6549 | 5589 | 9 | 0 | 4.041685714 | 11.72925  | 96.8195   |
| 6550 | 5590 | 9 | 0 | 4.041685714 | 13.684125 | 98.774375 |
| 6551 | 5591 | 9 | 0 | 6.062528571 | 11.72925  | 98.774375 |
| 6552 | 5592 | 9 | 0 | 6.062528571 | 13.684125 | 96.8195   |
| 6553 | 5593 | 9 | 0 | 4.041685714 | 15.639    | 89        |
| 6554 | 5594 | 9 | 0 | 4.041685714 | 17.593875 | 90.954875 |
| 6555 | 5595 | 9 | 0 | 6.062528571 | 15.639    | 90.954875 |
| 6556 | 5596 | 9 | 0 | 6.062528571 | 17.593875 | 89        |
| 6557 | 5597 | 9 | 0 | 4.041685714 | 15.639    | 92.90975  |
| 6558 | 5598 | 9 | 0 | 4.041685714 | 17.593875 | 94.864625 |
| 6559 | 5599 | 9 | 0 | 6.062528571 | 15.639    | 94.864625 |
| 6560 | 5600 | 9 | 0 | 6.062528571 | 17.593875 | 92.90975  |
| 6561 | 5601 | 9 | 0 | 4.041685714 | 15.639    | 96.8195   |
| 6562 | 5602 | 9 | 0 | 4.041685714 | 17.593875 | 98.774375 |
| 6563 | 5603 | 9 | 0 | 6.062528571 | 15.639    | 98.774375 |
| 6564 | 5604 | 9 | 0 | 6.062528571 | 17.593875 | 96.8195   |
| 6565 | 5605 | 9 | 0 | 4.041685714 | 19.54875  | 89        |
| 6566 | 5606 | 9 | 0 | 4.041685714 | 21.503625 | 90.954875 |
| 6567 | 5607 | 9 | 0 | 6.062528571 | 19.54875  | 90.954875 |
| 6568 | 5608 | 9 | 0 | 6.062528571 | 21.503625 | 89        |
| 6569 | 5609 | 9 | 0 | 4.041685714 | 19.54875  | 92.90975  |
| 6570 | 5610 | 9 | 0 | 4.041685714 | 21.503625 | 94.864625 |
| 6571 | 5611 | 9 | 0 | 6.062528571 | 19.54875  | 94.864625 |
| 6572 | 5612 | 9 | 0 | 6.062528571 | 21.503625 | 92.90975  |
| 6573 | 5613 | 9 | 0 | 4.041685714 | 19.54875  | 96.8195   |
| 6574 | 5614 | 9 | 0 | 4.041685714 | 21.503625 | 98.774375 |
| 6575 | 5615 | 9 | 0 | 6.062528571 | 19.54875  | 98.774375 |
| 6576 | 5616 | 9 | 0 | 6.062528571 | 21.503625 | 96.8195   |
| 6577 | 5617 | 9 | 0 | 4.041685714 | 23.4585   | 89        |
| 6578 | 5618 | 9 | 0 | 4.041685714 | 25.413375 | 90.954875 |
| 6579 | 5619 | 9 | 0 | 6.062528571 | 23.4585   | 90.954875 |
| 6580 | 5620 | 9 | 0 | 6.062528571 | 25.413375 | 89        |

|      |      |   |   |             |           |           |
|------|------|---|---|-------------|-----------|-----------|
| 6581 | 5621 | 9 | 0 | 4.041685714 | 23.4585   | 92.90975  |
| 6582 | 5622 | 9 | 0 | 4.041685714 | 25.413375 | 94.864625 |
| 6583 | 5623 | 9 | 0 | 6.062528571 | 23.4585   | 94.864625 |
| 6584 | 5624 | 9 | 0 | 6.062528571 | 25.413375 | 92.90975  |
| 6585 | 5625 | 9 | 0 | 4.041685714 | 23.4585   | 96.8195   |
| 6586 | 5626 | 9 | 0 | 4.041685714 | 25.413375 | 98.774375 |
| 6587 | 5627 | 9 | 0 | 6.062528571 | 23.4585   | 98.774375 |
| 6588 | 5628 | 9 | 0 | 6.062528571 | 25.413375 | 96.8195   |
| 6589 | 5629 | 9 | 0 | 4.041685714 | 27.36825  | 89        |
| 6590 | 5630 | 9 | 0 | 4.041685714 | 29.323125 | 90.954875 |
| 6591 | 5631 | 9 | 0 | 6.062528571 | 27.36825  | 90.954875 |
| 6592 | 5632 | 9 | 0 | 6.062528571 | 29.323125 | 89        |
| 6593 | 5633 | 9 | 0 | 4.041685714 | 27.36825  | 92.90975  |
| 6594 | 5634 | 9 | 0 | 4.041685714 | 29.323125 | 94.864625 |
| 6595 | 5635 | 9 | 0 | 6.062528571 | 27.36825  | 94.864625 |
| 6596 | 5636 | 9 | 0 | 6.062528571 | 29.323125 | 92.90975  |
| 6597 | 5637 | 9 | 0 | 4.041685714 | 27.36825  | 96.8195   |
| 6598 | 5638 | 9 | 0 | 4.041685714 | 29.323125 | 98.774375 |
| 6599 | 5639 | 9 | 0 | 6.062528571 | 27.36825  | 98.774375 |
| 6600 | 5640 | 9 | 0 | 6.062528571 | 29.323125 | 96.8195   |
| 6601 | 5641 | 9 | 0 | 8.083371429 | 0         | 89        |
| 6602 | 5642 | 9 | 0 | 8.083371429 | 1.954875  | 90.954875 |
| 6603 | 5643 | 9 | 0 | 10.10421429 | 0         | 90.954875 |
| 6604 | 5644 | 9 | 0 | 10.10421429 | 1.954875  | 89        |
| 6605 | 5645 | 9 | 0 | 8.083371429 | 0         | 92.90975  |
| 6606 | 5646 | 9 | 0 | 8.083371429 | 1.954875  | 94.864625 |
| 6607 | 5647 | 9 | 0 | 10.10421429 | 0         | 94.864625 |
| 6608 | 5648 | 9 | 0 | 10.10421429 | 1.954875  | 92.90975  |
| 6609 | 5649 | 9 | 0 | 8.083371429 | 0         | 96.8195   |
| 6610 | 5650 | 9 | 0 | 8.083371429 | 1.954875  | 98.774375 |
| 6611 | 5651 | 9 | 0 | 10.10421429 | 0         | 98.774375 |
| 6612 | 5652 | 9 | 0 | 10.10421429 | 1.954875  | 96.8195   |
| 6613 | 5653 | 9 | 0 | 8.083371429 | 3.90975   | 89        |
| 6614 | 5654 | 9 | 0 | 8.083371429 | 5.864625  | 90.954875 |
| 6615 | 5655 | 9 | 0 | 10.10421429 | 3.90975   | 90.954875 |
| 6616 | 5656 | 9 | 0 | 10.10421429 | 5.864625  | 89        |
| 6617 | 5657 | 9 | 0 | 8.083371429 | 3.90975   | 92.90975  |
| 6618 | 5658 | 9 | 0 | 8.083371429 | 5.864625  | 94.864625 |
| 6619 | 5659 | 9 | 0 | 10.10421429 | 3.90975   | 94.864625 |
| 6620 | 5660 | 9 | 0 | 10.10421429 | 5.864625  | 92.90975  |
| 6621 | 5661 | 9 | 0 | 8.083371429 | 3.90975   | 96.8195   |
| 6622 | 5662 | 9 | 0 | 8.083371429 | 5.864625  | 98.774375 |
| 6623 | 5663 | 9 | 0 | 10.10421429 | 3.90975   | 98.774375 |
| 6624 | 5664 | 9 | 0 | 10.10421429 | 5.864625  | 96.8195   |
| 6625 | 5665 | 9 | 0 | 8.083371429 | 7.8195    | 89        |
| 6626 | 5666 | 9 | 0 | 8.083371429 | 9.774375  | 90.954875 |
| 6627 | 5667 | 9 | 0 | 10.10421429 | 7.8195    | 90.954875 |
| 6628 | 5668 | 9 | 0 | 10.10421429 | 9.774375  | 89        |
| 6629 | 5669 | 9 | 0 | 8.083371429 | 7.8195    | 92.90975  |
| 6630 | 5670 | 9 | 0 | 8.083371429 | 9.774375  | 94.864625 |
| 6631 | 5671 | 9 | 0 | 10.10421429 | 7.8195    | 94.864625 |

|      |      |   |   |             |                     |
|------|------|---|---|-------------|---------------------|
| 6632 | 5672 | 9 | 0 | 10.10421429 | 9.774375 92.90975   |
| 6633 | 5673 | 9 | 0 | 8.083371429 | 7.8195 96.8195      |
| 6634 | 5674 | 9 | 0 | 8.083371429 | 9.774375 98.774375  |
| 6635 | 5675 | 9 | 0 | 10.10421429 | 7.8195 98.774375    |
| 6636 | 5676 | 9 | 0 | 10.10421429 | 9.774375 96.8195    |
| 6637 | 5677 | 9 | 0 | 8.083371429 | 11.72925 89         |
| 6638 | 5678 | 9 | 0 | 8.083371429 | 13.684125 90.954875 |
| 6639 | 5679 | 9 | 0 | 10.10421429 | 11.72925 90.954875  |
| 6640 | 5680 | 9 | 0 | 10.10421429 | 13.684125 89        |
| 6641 | 5681 | 9 | 0 | 8.083371429 | 11.72925 92.90975   |
| 6642 | 5682 | 9 | 0 | 8.083371429 | 13.684125 94.864625 |
| 6643 | 5683 | 9 | 0 | 10.10421429 | 11.72925 94.864625  |
| 6644 | 5684 | 9 | 0 | 10.10421429 | 13.684125 92.90975  |
| 6645 | 5685 | 9 | 0 | 8.083371429 | 11.72925 96.8195    |
| 6646 | 5686 | 9 | 0 | 8.083371429 | 13.684125 98.774375 |
| 6647 | 5687 | 9 | 0 | 10.10421429 | 11.72925 98.774375  |
| 6648 | 5688 | 9 | 0 | 10.10421429 | 13.684125 96.8195   |
| 6649 | 5689 | 9 | 0 | 8.083371429 | 15.639 89           |
| 6650 | 5690 | 9 | 0 | 8.083371429 | 17.593875 90.954875 |
| 6651 | 5691 | 9 | 0 | 10.10421429 | 15.639 90.954875    |
| 6652 | 5692 | 9 | 0 | 10.10421429 | 17.593875 89        |
| 6653 | 5693 | 9 | 0 | 8.083371429 | 15.639 92.90975     |
| 6654 | 5694 | 9 | 0 | 8.083371429 | 17.593875 94.864625 |
| 6655 | 5695 | 9 | 0 | 10.10421429 | 15.639 94.864625    |
| 6656 | 5696 | 9 | 0 | 10.10421429 | 17.593875 92.90975  |
| 6657 | 5697 | 9 | 0 | 8.083371429 | 15.639 96.8195      |
| 6658 | 5698 | 9 | 0 | 8.083371429 | 17.593875 98.774375 |
| 6659 | 5699 | 9 | 0 | 10.10421429 | 15.639 98.774375    |
| 6660 | 5700 | 9 | 0 | 10.10421429 | 17.593875 96.8195   |
| 6661 | 5701 | 9 | 0 | 8.083371429 | 19.54875 89         |
| 6662 | 5702 | 9 | 0 | 8.083371429 | 21.503625 90.954875 |
| 6663 | 5703 | 9 | 0 | 10.10421429 | 19.54875 90.954875  |
| 6664 | 5704 | 9 | 0 | 10.10421429 | 21.503625 89        |
| 6665 | 5705 | 9 | 0 | 8.083371429 | 19.54875 92.90975   |
| 6666 | 5706 | 9 | 0 | 8.083371429 | 21.503625 94.864625 |
| 6667 | 5707 | 9 | 0 | 10.10421429 | 19.54875 94.864625  |
| 6668 | 5708 | 9 | 0 | 10.10421429 | 21.503625 92.90975  |
| 6669 | 5709 | 9 | 0 | 8.083371429 | 19.54875 96.8195    |
| 6670 | 5710 | 9 | 0 | 8.083371429 | 21.503625 98.774375 |
| 6671 | 5711 | 9 | 0 | 10.10421429 | 19.54875 98.774375  |
| 6672 | 5712 | 9 | 0 | 10.10421429 | 21.503625 96.8195   |
| 6673 | 5713 | 9 | 0 | 8.083371429 | 23.4585 89          |
| 6674 | 5714 | 9 | 0 | 8.083371429 | 25.413375 90.954875 |
| 6675 | 5715 | 9 | 0 | 10.10421429 | 23.4585 90.954875   |
| 6676 | 5716 | 9 | 0 | 10.10421429 | 25.413375 89        |
| 6677 | 5717 | 9 | 0 | 8.083371429 | 23.4585 92.90975    |
| 6678 | 5718 | 9 | 0 | 8.083371429 | 25.413375 94.864625 |
| 6679 | 5719 | 9 | 0 | 10.10421429 | 23.4585 94.864625   |
| 6680 | 5720 | 9 | 0 | 10.10421429 | 25.413375 92.90975  |
| 6681 | 5721 | 9 | 0 | 8.083371429 | 23.4585 96.8195     |
| 6682 | 5722 | 9 | 0 | 8.083371429 | 25.413375 98.774375 |

|      |      |   |   |             |           |           |
|------|------|---|---|-------------|-----------|-----------|
| 6683 | 5723 | 9 | 0 | 10.10421429 | 23.4585   | 98.774375 |
| 6684 | 5724 | 9 | 0 | 10.10421429 | 25.413375 | 96.8195   |
| 6685 | 5725 | 9 | 0 | 8.083371429 | 27.36825  | 89        |
| 6686 | 5726 | 9 | 0 | 8.083371429 | 29.323125 | 90.954875 |
| 6687 | 5727 | 9 | 0 | 10.10421429 | 27.36825  | 90.954875 |
| 6688 | 5728 | 9 | 0 | 10.10421429 | 29.323125 | 89        |
| 6689 | 5729 | 9 | 0 | 8.083371429 | 27.36825  | 92.90975  |
| 6690 | 5730 | 9 | 0 | 8.083371429 | 29.323125 | 94.864625 |
| 6691 | 5731 | 9 | 0 | 10.10421429 | 27.36825  | 94.864625 |
| 6692 | 5732 | 9 | 0 | 10.10421429 | 29.323125 | 92.90975  |
| 6693 | 5733 | 9 | 0 | 8.083371429 | 27.36825  | 96.8195   |
| 6694 | 5734 | 9 | 0 | 8.083371429 | 29.323125 | 98.774375 |
| 6695 | 5735 | 9 | 0 | 10.10421429 | 27.36825  | 98.774375 |
| 6696 | 5736 | 9 | 0 | 10.10421429 | 29.323125 | 96.8195   |
| 6697 | 5737 | 9 | 0 | 12.12505714 | 0         | 89        |
| 6698 | 5738 | 9 | 0 | 12.12505714 | 1.954875  | 90.954875 |
| 6699 | 5739 | 9 | 0 | 14.1459     | 0         | 90.954875 |
| 6700 | 5740 | 9 | 0 | 14.1459     | 1.954875  | 89        |
| 6701 | 5741 | 9 | 0 | 12.12505714 | 0         | 92.90975  |
| 6702 | 5742 | 9 | 0 | 12.12505714 | 1.954875  | 94.864625 |
| 6703 | 5743 | 9 | 0 | 14.1459     | 0         | 94.864625 |
| 6704 | 5744 | 9 | 0 | 14.1459     | 1.954875  | 92.90975  |
| 6705 | 5745 | 9 | 0 | 12.12505714 | 0         | 96.8195   |
| 6706 | 5746 | 9 | 0 | 12.12505714 | 1.954875  | 98.774375 |
| 6707 | 5747 | 9 | 0 | 14.1459     | 0         | 98.774375 |
| 6708 | 5748 | 9 | 0 | 14.1459     | 1.954875  | 96.8195   |
| 6709 | 5749 | 9 | 0 | 12.12505714 | 3.90975   | 89        |
| 6710 | 5750 | 9 | 0 | 12.12505714 | 5.864625  | 90.954875 |
| 6711 | 5751 | 9 | 0 | 14.1459     | 3.90975   | 90.954875 |
| 6712 | 5752 | 9 | 0 | 14.1459     | 5.864625  | 89        |
| 6713 | 5753 | 9 | 0 | 12.12505714 | 3.90975   | 92.90975  |
| 6714 | 5754 | 9 | 0 | 12.12505714 | 5.864625  | 94.864625 |
| 6715 | 5755 | 9 | 0 | 14.1459     | 3.90975   | 94.864625 |
| 6716 | 5756 | 9 | 0 | 14.1459     | 5.864625  | 92.90975  |
| 6717 | 5757 | 9 | 0 | 12.12505714 | 3.90975   | 96.8195   |
| 6718 | 5758 | 9 | 0 | 12.12505714 | 5.864625  | 98.774375 |
| 6719 | 5759 | 9 | 0 | 14.1459     | 3.90975   | 98.774375 |
| 6720 | 5760 | 9 | 0 | 14.1459     | 5.864625  | 96.8195   |
| 6721 | 5761 | 9 | 0 | 12.12505714 | 7.8195    | 89        |
| 6722 | 5762 | 9 | 0 | 12.12505714 | 9.774375  | 90.954875 |
| 6723 | 5763 | 9 | 0 | 14.1459     | 7.8195    | 90.954875 |
| 6724 | 5764 | 9 | 0 | 14.1459     | 9.774375  | 89        |
| 6725 | 5765 | 9 | 0 | 12.12505714 | 7.8195    | 92.90975  |
| 6726 | 5766 | 9 | 0 | 12.12505714 | 9.774375  | 94.864625 |
| 6727 | 5767 | 9 | 0 | 14.1459     | 7.8195    | 94.864625 |
| 6728 | 5768 | 9 | 0 | 14.1459     | 9.774375  | 92.90975  |
| 6729 | 5769 | 9 | 0 | 12.12505714 | 7.8195    | 96.8195   |
| 6730 | 5770 | 9 | 0 | 12.12505714 | 9.774375  | 98.774375 |
| 6731 | 5771 | 9 | 0 | 14.1459     | 7.8195    | 98.774375 |
| 6732 | 5772 | 9 | 0 | 14.1459     | 9.774375  | 96.8195   |
| 6733 | 5773 | 9 | 0 | 12.12505714 | 11.72925  | 89        |

|      |      |   |   |             |           |           |
|------|------|---|---|-------------|-----------|-----------|
| 6734 | 5774 | 9 | 0 | 12.12505714 | 13.684125 | 90.954875 |
| 6735 | 5775 | 9 | 0 | 14.1459     | 11.72925  | 90.954875 |
| 6736 | 5776 | 9 | 0 | 14.1459     | 13.684125 | 89        |
| 6737 | 5777 | 9 | 0 | 12.12505714 | 11.72925  | 92.90975  |
| 6738 | 5778 | 9 | 0 | 12.12505714 | 13.684125 | 94.864625 |
| 6739 | 5779 | 9 | 0 | 14.1459     | 11.72925  | 94.864625 |
| 6740 | 5780 | 9 | 0 | 14.1459     | 13.684125 | 92.90975  |
| 6741 | 5781 | 9 | 0 | 12.12505714 | 11.72925  | 96.8195   |
| 6742 | 5782 | 9 | 0 | 12.12505714 | 13.684125 | 98.774375 |
| 6743 | 5783 | 9 | 0 | 14.1459     | 11.72925  | 98.774375 |
| 6744 | 5784 | 9 | 0 | 14.1459     | 13.684125 | 96.8195   |
| 6745 | 5785 | 9 | 0 | 12.12505714 | 15.639    | 89        |
| 6746 | 5786 | 9 | 0 | 12.12505714 | 17.593875 | 90.954875 |
| 6747 | 5787 | 9 | 0 | 14.1459     | 15.639    | 90.954875 |
| 6748 | 5788 | 9 | 0 | 14.1459     | 17.593875 | 89        |
| 6749 | 5789 | 9 | 0 | 12.12505714 | 15.639    | 92.90975  |
| 6750 | 5790 | 9 | 0 | 12.12505714 | 17.593875 | 94.864625 |
| 6751 | 5791 | 9 | 0 | 14.1459     | 15.639    | 94.864625 |
| 6752 | 5792 | 9 | 0 | 14.1459     | 17.593875 | 92.90975  |
| 6753 | 5793 | 9 | 0 | 12.12505714 | 15.639    | 96.8195   |
| 6754 | 5794 | 9 | 0 | 12.12505714 | 17.593875 | 98.774375 |
| 6755 | 5795 | 9 | 0 | 14.1459     | 15.639    | 98.774375 |
| 6756 | 5796 | 9 | 0 | 14.1459     | 17.593875 | 96.8195   |
| 6757 | 5797 | 9 | 0 | 12.12505714 | 19.54875  | 89        |
| 6758 | 5798 | 9 | 0 | 12.12505714 | 21.503625 | 90.954875 |
| 6759 | 5799 | 9 | 0 | 14.1459     | 19.54875  | 90.954875 |
| 6760 | 5800 | 9 | 0 | 14.1459     | 21.503625 | 89        |
| 6761 | 5801 | 9 | 0 | 12.12505714 | 19.54875  | 92.90975  |
| 6762 | 5802 | 9 | 0 | 12.12505714 | 21.503625 | 94.864625 |
| 6763 | 5803 | 9 | 0 | 14.1459     | 19.54875  | 94.864625 |
| 6764 | 5804 | 9 | 0 | 14.1459     | 21.503625 | 92.90975  |
| 6765 | 5805 | 9 | 0 | 12.12505714 | 19.54875  | 96.8195   |
| 6766 | 5806 | 9 | 0 | 12.12505714 | 21.503625 | 98.774375 |
| 6767 | 5807 | 9 | 0 | 14.1459     | 19.54875  | 98.774375 |
| 6768 | 5808 | 9 | 0 | 14.1459     | 21.503625 | 96.8195   |
| 6769 | 5809 | 9 | 0 | 12.12505714 | 23.4585   | 89        |
| 6770 | 5810 | 9 | 0 | 12.12505714 | 25.413375 | 90.954875 |
| 6771 | 5811 | 9 | 0 | 14.1459     | 23.4585   | 90.954875 |
| 6772 | 5812 | 9 | 0 | 14.1459     | 25.413375 | 89        |
| 6773 | 5813 | 9 | 0 | 12.12505714 | 23.4585   | 92.90975  |
| 6774 | 5814 | 9 | 0 | 12.12505714 | 25.413375 | 94.864625 |
| 6775 | 5815 | 9 | 0 | 14.1459     | 23.4585   | 94.864625 |
| 6776 | 5816 | 9 | 0 | 14.1459     | 25.413375 | 92.90975  |
| 6777 | 5817 | 9 | 0 | 12.12505714 | 23.4585   | 96.8195   |
| 6778 | 5818 | 9 | 0 | 12.12505714 | 25.413375 | 98.774375 |
| 6779 | 5819 | 9 | 0 | 14.1459     | 23.4585   | 98.774375 |
| 6780 | 5820 | 9 | 0 | 14.1459     | 25.413375 | 96.8195   |
| 6781 | 5821 | 9 | 0 | 12.12505714 | 27.36825  | 89        |
| 6782 | 5822 | 9 | 0 | 12.12505714 | 29.323125 | 90.954875 |
| 6783 | 5823 | 9 | 0 | 14.1459     | 27.36825  | 90.954875 |
| 6784 | 5824 | 9 | 0 | 14.1459     | 29.323125 | 89        |

|      |      |   |   |             |           |           |
|------|------|---|---|-------------|-----------|-----------|
| 6785 | 5825 | 9 | 0 | 12.12505714 | 27.36825  | 92.90975  |
| 6786 | 5826 | 9 | 0 | 12.12505714 | 29.323125 | 94.864625 |
| 6787 | 5827 | 9 | 0 | 14.1459     | 27.36825  | 94.864625 |
| 6788 | 5828 | 9 | 0 | 14.1459     | 29.323125 | 92.90975  |
| 6789 | 5829 | 9 | 0 | 12.12505714 | 27.36825  | 96.8195   |
| 6790 | 5830 | 9 | 0 | 12.12505714 | 29.323125 | 98.774375 |
| 6791 | 5831 | 9 | 0 | 14.1459     | 27.36825  | 98.774375 |
| 6792 | 5832 | 9 | 0 | 14.1459     | 29.323125 | 96.8195   |
| 6793 | 5833 | 9 | 0 | 16.16674286 | 0         | 89        |
| 6794 | 5834 | 9 | 0 | 16.16674286 | 1.954875  | 90.954875 |
| 6795 | 5835 | 9 | 0 | 18.18758571 | 0         | 90.954875 |
| 6796 | 5836 | 9 | 0 | 18.18758571 | 1.954875  | 89        |
| 6797 | 5837 | 9 | 0 | 16.16674286 | 0         | 92.90975  |
| 6798 | 5838 | 9 | 0 | 16.16674286 | 1.954875  | 94.864625 |
| 6799 | 5839 | 9 | 0 | 18.18758571 | 0         | 94.864625 |
| 6800 | 5840 | 9 | 0 | 18.18758571 | 1.954875  | 92.90975  |
| 6801 | 5841 | 9 | 0 | 16.16674286 | 0         | 96.8195   |
| 6802 | 5842 | 9 | 0 | 16.16674286 | 1.954875  | 98.774375 |
| 6803 | 5843 | 9 | 0 | 18.18758571 | 0         | 98.774375 |
| 6804 | 5844 | 9 | 0 | 18.18758571 | 1.954875  | 96.8195   |
| 6805 | 5845 | 9 | 0 | 16.16674286 | 3.90975   | 89        |
| 6806 | 5846 | 9 | 0 | 16.16674286 | 5.864625  | 90.954875 |
| 6807 | 5847 | 9 | 0 | 18.18758571 | 3.90975   | 90.954875 |
| 6808 | 5848 | 9 | 0 | 18.18758571 | 5.864625  | 89        |
| 6809 | 5849 | 9 | 0 | 16.16674286 | 3.90975   | 92.90975  |
| 6810 | 5850 | 9 | 0 | 16.16674286 | 5.864625  | 94.864625 |
| 6811 | 5851 | 9 | 0 | 18.18758571 | 3.90975   | 94.864625 |
| 6812 | 5852 | 9 | 0 | 18.18758571 | 5.864625  | 92.90975  |
| 6813 | 5853 | 9 | 0 | 16.16674286 | 3.90975   | 96.8195   |
| 6814 | 5854 | 9 | 0 | 16.16674286 | 5.864625  | 98.774375 |
| 6815 | 5855 | 9 | 0 | 18.18758571 | 3.90975   | 98.774375 |
| 6816 | 5856 | 9 | 0 | 18.18758571 | 5.864625  | 96.8195   |
| 6817 | 5857 | 9 | 0 | 16.16674286 | 7.8195    | 89        |
| 6818 | 5858 | 9 | 0 | 16.16674286 | 9.774375  | 90.954875 |
| 6819 | 5859 | 9 | 0 | 18.18758571 | 7.8195    | 90.954875 |
| 6820 | 5860 | 9 | 0 | 18.18758571 | 9.774375  | 89        |
| 6821 | 5861 | 9 | 0 | 16.16674286 | 7.8195    | 92.90975  |
| 6822 | 5862 | 9 | 0 | 16.16674286 | 9.774375  | 94.864625 |
| 6823 | 5863 | 9 | 0 | 18.18758571 | 7.8195    | 94.864625 |
| 6824 | 5864 | 9 | 0 | 18.18758571 | 9.774375  | 92.90975  |
| 6825 | 5865 | 9 | 0 | 16.16674286 | 7.8195    | 96.8195   |
| 6826 | 5866 | 9 | 0 | 16.16674286 | 9.774375  | 98.774375 |
| 6827 | 5867 | 9 | 0 | 18.18758571 | 7.8195    | 98.774375 |
| 6828 | 5868 | 9 | 0 | 18.18758571 | 9.774375  | 96.8195   |
| 6829 | 5869 | 9 | 0 | 16.16674286 | 11.72925  | 89        |
| 6830 | 5870 | 9 | 0 | 16.16674286 | 13.684125 | 90.954875 |
| 6831 | 5871 | 9 | 0 | 18.18758571 | 11.72925  | 90.954875 |
| 6832 | 5872 | 9 | 0 | 18.18758571 | 13.684125 | 89        |
| 6833 | 5873 | 9 | 0 | 16.16674286 | 11.72925  | 92.90975  |
| 6834 | 5874 | 9 | 0 | 16.16674286 | 13.684125 | 94.864625 |
| 6835 | 5875 | 9 | 0 | 18.18758571 | 11.72925  | 94.864625 |

|      |      |   |   |             |                    |
|------|------|---|---|-------------|--------------------|
| 6836 | 5876 | 9 | 0 | 18.18758571 | 13.68412592.90975  |
| 6837 | 5877 | 9 | 0 | 16.16674286 | 11.72925 96.8195   |
| 6838 | 5878 | 9 | 0 | 16.16674286 | 13.68412598.774375 |
| 6839 | 5879 | 9 | 0 | 18.18758571 | 11.72925 98.774375 |
| 6840 | 5880 | 9 | 0 | 18.18758571 | 13.68412596.8195   |
| 6841 | 5881 | 9 | 0 | 16.16674286 | 15.639 89          |
| 6842 | 5882 | 9 | 0 | 16.16674286 | 17.59387590.954875 |
| 6843 | 5883 | 9 | 0 | 18.18758571 | 15.639 90.954875   |
| 6844 | 5884 | 9 | 0 | 18.18758571 | 17.59387589        |
| 6845 | 5885 | 9 | 0 | 16.16674286 | 15.639 92.90975    |
| 6846 | 5886 | 9 | 0 | 16.16674286 | 17.59387594.864625 |
| 6847 | 5887 | 9 | 0 | 18.18758571 | 15.639 94.864625   |
| 6848 | 5888 | 9 | 0 | 18.18758571 | 17.59387592.90975  |
| 6849 | 5889 | 9 | 0 | 16.16674286 | 15.639 96.8195     |
| 6850 | 5890 | 9 | 0 | 16.16674286 | 17.59387598.774375 |
| 6851 | 5891 | 9 | 0 | 18.18758571 | 15.639 98.774375   |
| 6852 | 5892 | 9 | 0 | 18.18758571 | 17.59387596.8195   |
| 6853 | 5893 | 9 | 0 | 16.16674286 | 19.54875 89        |
| 6854 | 5894 | 9 | 0 | 16.16674286 | 21.50362590.954875 |
| 6855 | 5895 | 9 | 0 | 18.18758571 | 19.54875 90.954875 |
| 6856 | 5896 | 9 | 0 | 18.18758571 | 21.50362589        |
| 6857 | 5897 | 9 | 0 | 16.16674286 | 19.54875 92.90975  |
| 6858 | 5898 | 9 | 0 | 16.16674286 | 21.50362594.864625 |
| 6859 | 5899 | 9 | 0 | 18.18758571 | 19.54875 94.864625 |
| 6860 | 5900 | 9 | 0 | 18.18758571 | 21.50362592.90975  |
| 6861 | 5901 | 9 | 0 | 16.16674286 | 19.54875 96.8195   |
| 6862 | 5902 | 9 | 0 | 16.16674286 | 21.50362598.774375 |
| 6863 | 5903 | 9 | 0 | 18.18758571 | 19.54875 98.774375 |
| 6864 | 5904 | 9 | 0 | 18.18758571 | 21.50362596.8195   |
| 6865 | 5905 | 9 | 0 | 16.16674286 | 23.4585 89         |
| 6866 | 5906 | 9 | 0 | 16.16674286 | 25.41337590.954875 |
| 6867 | 5907 | 9 | 0 | 18.18758571 | 23.4585 90.954875  |
| 6868 | 5908 | 9 | 0 | 18.18758571 | 25.41337589        |
| 6869 | 5909 | 9 | 0 | 16.16674286 | 23.4585 92.90975   |
| 6870 | 5910 | 9 | 0 | 16.16674286 | 25.41337594.864625 |
| 6871 | 5911 | 9 | 0 | 18.18758571 | 23.4585 94.864625  |
| 6872 | 5912 | 9 | 0 | 18.18758571 | 25.41337592.90975  |
| 6873 | 5913 | 9 | 0 | 16.16674286 | 23.4585 96.8195    |
| 6874 | 5914 | 9 | 0 | 16.16674286 | 25.41337598.774375 |
| 6875 | 5915 | 9 | 0 | 18.18758571 | 23.4585 98.774375  |
| 6876 | 5916 | 9 | 0 | 18.18758571 | 25.41337596.8195   |
| 6877 | 5917 | 9 | 0 | 16.16674286 | 27.36825 89        |
| 6878 | 5918 | 9 | 0 | 16.16674286 | 29.32312590.954875 |
| 6879 | 5919 | 9 | 0 | 18.18758571 | 27.36825 90.954875 |
| 6880 | 5920 | 9 | 0 | 18.18758571 | 29.32312589        |
| 6881 | 5921 | 9 | 0 | 16.16674286 | 27.36825 92.90975  |
| 6882 | 5922 | 9 | 0 | 16.16674286 | 29.32312594.864625 |
| 6883 | 5923 | 9 | 0 | 18.18758571 | 27.36825 94.864625 |
| 6884 | 5924 | 9 | 0 | 18.18758571 | 29.32312592.90975  |
| 6885 | 5925 | 9 | 0 | 16.16674286 | 27.36825 96.8195   |
| 6886 | 5926 | 9 | 0 | 16.16674286 | 29.32312598.774375 |



|      |      |   |   |             |           |           |
|------|------|---|---|-------------|-----------|-----------|
| 6887 | 5927 | 9 | 0 | 18.18758571 | 27.36825  | 98.774375 |
| 6888 | 5928 | 9 | 0 | 18.18758571 | 29.323125 | 96.8195   |
| 6889 | 5929 | 9 | 0 | 20.20842857 | 0         | 89        |
| 6890 | 5930 | 9 | 0 | 20.20842857 | 1.954875  | 90.954875 |
| 6891 | 5931 | 9 | 0 | 22.22927143 | 0         | 90.954875 |
| 6892 | 5932 | 9 | 0 | 22.22927143 | 1.954875  | 89        |
| 6893 | 5933 | 9 | 0 | 20.20842857 | 0         | 92.90975  |
| 6894 | 5934 | 9 | 0 | 20.20842857 | 1.954875  | 94.864625 |
| 6895 | 5935 | 9 | 0 | 22.22927143 | 0         | 94.864625 |
| 6896 | 5936 | 9 | 0 | 22.22927143 | 1.954875  | 92.90975  |
| 6897 | 5937 | 9 | 0 | 20.20842857 | 0         | 96.8195   |
| 6898 | 5938 | 9 | 0 | 20.20842857 | 1.954875  | 98.774375 |
| 6899 | 5939 | 9 | 0 | 22.22927143 | 0         | 98.774375 |
| 6900 | 5940 | 9 | 0 | 22.22927143 | 1.954875  | 96.8195   |
| 6901 | 5941 | 9 | 0 | 20.20842857 | 3.90975   | 89        |
| 6902 | 5942 | 9 | 0 | 20.20842857 | 5.864625  | 90.954875 |
| 6903 | 5943 | 9 | 0 | 22.22927143 | 3.90975   | 90.954875 |
| 6904 | 5944 | 9 | 0 | 22.22927143 | 5.864625  | 89        |
| 6905 | 5945 | 9 | 0 | 20.20842857 | 3.90975   | 92.90975  |
| 6906 | 5946 | 9 | 0 | 20.20842857 | 5.864625  | 94.864625 |
| 6907 | 5947 | 9 | 0 | 22.22927143 | 3.90975   | 94.864625 |
| 6908 | 5948 | 9 | 0 | 22.22927143 | 5.864625  | 92.90975  |
| 6909 | 5949 | 9 | 0 | 20.20842857 | 3.90975   | 96.8195   |
| 6910 | 5950 | 9 | 0 | 20.20842857 | 5.864625  | 98.774375 |
| 6911 | 5951 | 9 | 0 | 22.22927143 | 3.90975   | 98.774375 |
| 6912 | 5952 | 9 | 0 | 22.22927143 | 5.864625  | 96.8195   |
| 6913 | 5953 | 9 | 0 | 20.20842857 | 7.8195    | 89        |
| 6914 | 5954 | 9 | 0 | 20.20842857 | 9.774375  | 90.954875 |
| 6915 | 5955 | 9 | 0 | 22.22927143 | 7.8195    | 90.954875 |
| 6916 | 5956 | 9 | 0 | 22.22927143 | 9.774375  | 89        |
| 6917 | 5957 | 9 | 0 | 20.20842857 | 7.8195    | 92.90975  |
| 6918 | 5958 | 9 | 0 | 20.20842857 | 9.774375  | 94.864625 |
| 6919 | 5959 | 9 | 0 | 22.22927143 | 7.8195    | 94.864625 |
| 6920 | 5960 | 9 | 0 | 22.22927143 | 9.774375  | 92.90975  |
| 6921 | 5961 | 9 | 0 | 20.20842857 | 7.8195    | 96.8195   |
| 6922 | 5962 | 9 | 0 | 20.20842857 | 9.774375  | 98.774375 |
| 6923 | 5963 | 9 | 0 | 22.22927143 | 7.8195    | 98.774375 |
| 6924 | 5964 | 9 | 0 | 22.22927143 | 9.774375  | 96.8195   |
| 6925 | 5965 | 9 | 0 | 20.20842857 | 11.72925  | 89        |
| 6926 | 5966 | 9 | 0 | 20.20842857 | 13.684125 | 90.954875 |
| 6927 | 5967 | 9 | 0 | 22.22927143 | 11.72925  | 90.954875 |
| 6928 | 5968 | 9 | 0 | 22.22927143 | 13.684125 | 89        |
| 6929 | 5969 | 9 | 0 | 20.20842857 | 11.72925  | 92.90975  |
| 6930 | 5970 | 9 | 0 | 20.20842857 | 13.684125 | 94.864625 |
| 6931 | 5971 | 9 | 0 | 22.22927143 | 11.72925  | 94.864625 |
| 6932 | 5972 | 9 | 0 | 22.22927143 | 13.684125 | 92.90975  |
| 6933 | 5973 | 9 | 0 | 20.20842857 | 11.72925  | 96.8195   |
| 6934 | 5974 | 9 | 0 | 20.20842857 | 13.684125 | 98.774375 |
| 6935 | 5975 | 9 | 0 | 22.22927143 | 11.72925  | 98.774375 |
| 6936 | 5976 | 9 | 0 | 22.22927143 | 13.684125 | 96.8195   |
| 6937 | 5977 | 9 | 0 | 20.20842857 | 15.639    | 89        |

|      |      |   |   |             |                     |
|------|------|---|---|-------------|---------------------|
| 6938 | 5978 | 9 | 0 | 20.20842857 | 17.593875 90.954875 |
| 6939 | 5979 | 9 | 0 | 22.22927143 | 15.639 90.954875    |
| 6940 | 5980 | 9 | 0 | 22.22927143 | 17.593875 89        |
| 6941 | 5981 | 9 | 0 | 20.20842857 | 15.639 92.90975     |
| 6942 | 5982 | 9 | 0 | 20.20842857 | 17.593875 94.864625 |
| 6943 | 5983 | 9 | 0 | 22.22927143 | 15.639 94.864625    |
| 6944 | 5984 | 9 | 0 | 22.22927143 | 17.593875 92.90975  |
| 6945 | 5985 | 9 | 0 | 20.20842857 | 15.639 96.8195      |
| 6946 | 5986 | 9 | 0 | 20.20842857 | 17.593875 98.774375 |
| 6947 | 5987 | 9 | 0 | 22.22927143 | 15.639 98.774375    |
| 6948 | 5988 | 9 | 0 | 22.22927143 | 17.593875 96.8195   |
| 6949 | 5989 | 9 | 0 | 20.20842857 | 19.54875 89         |
| 6950 | 5990 | 9 | 0 | 20.20842857 | 21.503625 90.954875 |
| 6951 | 5991 | 9 | 0 | 22.22927143 | 19.54875 90.954875  |
| 6952 | 5992 | 9 | 0 | 22.22927143 | 21.503625 89        |
| 6953 | 5993 | 9 | 0 | 20.20842857 | 19.54875 92.90975   |
| 6954 | 5994 | 9 | 0 | 20.20842857 | 21.503625 94.864625 |
| 6955 | 5995 | 9 | 0 | 22.22927143 | 19.54875 94.864625  |
| 6956 | 5996 | 9 | 0 | 22.22927143 | 21.503625 92.90975  |
| 6957 | 5997 | 9 | 0 | 20.20842857 | 19.54875 96.8195    |
| 6958 | 5998 | 9 | 0 | 20.20842857 | 21.503625 98.774375 |
| 6959 | 5999 | 9 | 0 | 22.22927143 | 19.54875 98.774375  |
| 6960 | 6000 | 9 | 0 | 22.22927143 | 21.503625 96.8195   |
| 6961 | 6001 | 9 | 0 | 20.20842857 | 23.4585 89          |
| 6962 | 6002 | 9 | 0 | 20.20842857 | 25.413375 90.954875 |
| 6963 | 6003 | 9 | 0 | 22.22927143 | 23.4585 90.954875   |
| 6964 | 6004 | 9 | 0 | 22.22927143 | 25.413375 89        |
| 6965 | 6005 | 9 | 0 | 20.20842857 | 23.4585 92.90975    |
| 6966 | 6006 | 9 | 0 | 20.20842857 | 25.413375 94.864625 |
| 6967 | 6007 | 9 | 0 | 22.22927143 | 23.4585 94.864625   |
| 6968 | 6008 | 9 | 0 | 22.22927143 | 25.413375 92.90975  |
| 6969 | 6009 | 9 | 0 | 20.20842857 | 23.4585 96.8195     |
| 6970 | 6010 | 9 | 0 | 20.20842857 | 25.413375 98.774375 |
| 6971 | 6011 | 9 | 0 | 22.22927143 | 23.4585 98.774375   |
| 6972 | 6012 | 9 | 0 | 22.22927143 | 25.413375 96.8195   |
| 6973 | 6013 | 9 | 0 | 20.20842857 | 27.36825 89         |
| 6974 | 6014 | 9 | 0 | 20.20842857 | 29.323125 90.954875 |
| 6975 | 6015 | 9 | 0 | 22.22927143 | 27.36825 90.954875  |
| 6976 | 6016 | 9 | 0 | 22.22927143 | 29.323125 89        |
| 6977 | 6017 | 9 | 0 | 20.20842857 | 27.36825 92.90975   |
| 6978 | 6018 | 9 | 0 | 20.20842857 | 29.323125 94.864625 |
| 6979 | 6019 | 9 | 0 | 22.22927143 | 27.36825 94.864625  |
| 6980 | 6020 | 9 | 0 | 22.22927143 | 29.323125 92.90975  |
| 6981 | 6021 | 9 | 0 | 20.20842857 | 27.36825 96.8195    |
| 6982 | 6022 | 9 | 0 | 20.20842857 | 29.323125 98.774375 |
| 6983 | 6023 | 9 | 0 | 22.22927143 | 27.36825 98.774375  |
| 6984 | 6024 | 9 | 0 | 22.22927143 | 29.323125 96.8195   |
| 6985 | 6025 | 9 | 0 | 24.25011429 | 0 89                |
| 6986 | 6026 | 9 | 0 | 24.25011429 | 1.954875 90.954875  |
| 6987 | 6027 | 9 | 0 | 26.27095714 | 0 90.954875         |
| 6988 | 6028 | 9 | 0 | 26.27095714 | 1.954875 89         |

|      |      |   |   |             |           |           |
|------|------|---|---|-------------|-----------|-----------|
| 6989 | 6029 | 9 | 0 | 24.25011429 | 0         | 92.90975  |
| 6990 | 6030 | 9 | 0 | 24.25011429 | 1.954875  | 94.864625 |
| 6991 | 6031 | 9 | 0 | 26.27095714 | 0         | 94.864625 |
| 6992 | 6032 | 9 | 0 | 26.27095714 | 1.954875  | 92.90975  |
| 6993 | 6033 | 9 | 0 | 24.25011429 | 0         | 96.8195   |
| 6994 | 6034 | 9 | 0 | 24.25011429 | 1.954875  | 98.774375 |
| 6995 | 6035 | 9 | 0 | 26.27095714 | 0         | 98.774375 |
| 6996 | 6036 | 9 | 0 | 26.27095714 | 1.954875  | 96.8195   |
| 6997 | 6037 | 9 | 0 | 24.25011429 | 3.90975   | 89        |
| 6998 | 6038 | 9 | 0 | 24.25011429 | 5.864625  | 90.954875 |
| 6999 | 6039 | 9 | 0 | 26.27095714 | 3.90975   | 90.954875 |
| 7000 | 6040 | 9 | 0 | 26.27095714 | 5.864625  | 89        |
| 7001 | 6041 | 9 | 0 | 24.25011429 | 3.90975   | 92.90975  |
| 7002 | 6042 | 9 | 0 | 24.25011429 | 5.864625  | 94.864625 |
| 7003 | 6043 | 9 | 0 | 26.27095714 | 3.90975   | 94.864625 |
| 7004 | 6044 | 9 | 0 | 26.27095714 | 5.864625  | 92.90975  |
| 7005 | 6045 | 9 | 0 | 24.25011429 | 3.90975   | 96.8195   |
| 7006 | 6046 | 9 | 0 | 24.25011429 | 5.864625  | 98.774375 |
| 7007 | 6047 | 9 | 0 | 26.27095714 | 3.90975   | 98.774375 |
| 7008 | 6048 | 9 | 0 | 26.27095714 | 5.864625  | 96.8195   |
| 7009 | 6049 | 9 | 0 | 24.25011429 | 7.8195    | 89        |
| 7010 | 6050 | 9 | 0 | 24.25011429 | 9.774375  | 90.954875 |
| 7011 | 6051 | 9 | 0 | 26.27095714 | 7.8195    | 90.954875 |
| 7012 | 6052 | 9 | 0 | 26.27095714 | 9.774375  | 89        |
| 7013 | 6053 | 9 | 0 | 24.25011429 | 7.8195    | 92.90975  |
| 7014 | 6054 | 9 | 0 | 24.25011429 | 9.774375  | 94.864625 |
| 7015 | 6055 | 9 | 0 | 26.27095714 | 7.8195    | 94.864625 |
| 7016 | 6056 | 9 | 0 | 26.27095714 | 9.774375  | 92.90975  |
| 7017 | 6057 | 9 | 0 | 24.25011429 | 7.8195    | 96.8195   |
| 7018 | 6058 | 9 | 0 | 24.25011429 | 9.774375  | 98.774375 |
| 7019 | 6059 | 9 | 0 | 26.27095714 | 7.8195    | 98.774375 |
| 7020 | 6060 | 9 | 0 | 26.27095714 | 9.774375  | 96.8195   |
| 7021 | 6061 | 9 | 0 | 24.25011429 | 11.72925  | 89        |
| 7022 | 6062 | 9 | 0 | 24.25011429 | 13.684125 | 90.954875 |
| 7023 | 6063 | 9 | 0 | 26.27095714 | 11.72925  | 90.954875 |
| 7024 | 6064 | 9 | 0 | 26.27095714 | 13.684125 | 89        |
| 7025 | 6065 | 9 | 0 | 24.25011429 | 11.72925  | 92.90975  |
| 7026 | 6066 | 9 | 0 | 24.25011429 | 13.684125 | 94.864625 |
| 7027 | 6067 | 9 | 0 | 26.27095714 | 11.72925  | 94.864625 |
| 7028 | 6068 | 9 | 0 | 26.27095714 | 13.684125 | 92.90975  |
| 7029 | 6069 | 9 | 0 | 24.25011429 | 11.72925  | 96.8195   |
| 7030 | 6070 | 9 | 0 | 24.25011429 | 13.684125 | 98.774375 |
| 7031 | 6071 | 9 | 0 | 26.27095714 | 11.72925  | 98.774375 |
| 7032 | 6072 | 9 | 0 | 26.27095714 | 13.684125 | 96.8195   |
| 7033 | 6073 | 9 | 0 | 24.25011429 | 15.639    | 89        |
| 7034 | 6074 | 9 | 0 | 24.25011429 | 17.593875 | 90.954875 |
| 7035 | 6075 | 9 | 0 | 26.27095714 | 15.639    | 90.954875 |
| 7036 | 6076 | 9 | 0 | 26.27095714 | 17.593875 | 89        |
| 7037 | 6077 | 9 | 0 | 24.25011429 | 15.639    | 92.90975  |
| 7038 | 6078 | 9 | 0 | 24.25011429 | 17.593875 | 94.864625 |
| 7039 | 6079 | 9 | 0 | 26.27095714 | 15.639    | 94.864625 |

|      |      |    |   |                      |                    |
|------|------|----|---|----------------------|--------------------|
| 7040 | 6080 | 9  | 0 | 26.27095714          | 17.59387592.90975  |
| 7041 | 6081 | 9  | 0 | 24.25011429          | 15.639 96.8195     |
| 7042 | 6082 | 9  | 0 | 24.25011429          | 17.59387598.774375 |
| 7043 | 6083 | 9  | 0 | 26.27095714          | 15.639 98.774375   |
| 7044 | 6084 | 9  | 0 | 26.27095714          | 17.59387596.8195   |
| 7045 | 6085 | 9  | 0 | 24.25011429          | 19.54875 89        |
| 7046 | 6086 | 9  | 0 | 24.25011429          | 21.50362590.954875 |
| 7047 | 6087 | 9  | 0 | 26.27095714          | 19.54875 90.954875 |
| 7048 | 6088 | 9  | 0 | 26.27095714          | 21.50362589        |
| 7049 | 6089 | 9  | 0 | 24.25011429          | 19.54875 92.90975  |
| 7050 | 6090 | 9  | 0 | 24.25011429          | 21.50362594.864625 |
| 7051 | 6091 | 9  | 0 | 26.27095714          | 19.54875 94.864625 |
| 7052 | 6092 | 9  | 0 | 26.27095714          | 21.50362592.90975  |
| 7053 | 6093 | 9  | 0 | 24.25011429          | 19.54875 96.8195   |
| 7054 | 6094 | 9  | 0 | 24.25011429          | 21.50362598.774375 |
| 7055 | 6095 | 9  | 0 | 26.27095714          | 19.54875 98.774375 |
| 7056 | 6096 | 9  | 0 | 26.27095714          | 21.50362596.8195   |
| 7057 | 6097 | 9  | 0 | 24.25011429          | 23.4585 89         |
| 7058 | 6098 | 9  | 0 | 24.25011429          | 25.41337590.954875 |
| 7059 | 6099 | 9  | 0 | 26.27095714          | 23.4585 90.954875  |
| 7060 | 6100 | 9  | 0 | 26.27095714          | 25.41337589        |
| 7061 | 6101 | 9  | 0 | 24.25011429          | 23.4585 92.90975   |
| 7062 | 6102 | 9  | 0 | 24.25011429          | 25.41337594.864625 |
| 7063 | 6103 | 9  | 0 | 26.27095714          | 23.4585 94.864625  |
| 7064 | 6104 | 9  | 0 | 26.27095714          | 25.41337592.90975  |
| 7065 | 6105 | 9  | 0 | 24.25011429          | 23.4585 96.8195    |
| 7066 | 6106 | 9  | 0 | 24.25011429          | 25.41337598.774375 |
| 7067 | 6107 | 9  | 0 | 26.27095714          | 23.4585 98.774375  |
| 7068 | 6108 | 9  | 0 | 26.27095714          | 25.41337596.8195   |
| 7069 | 6109 | 9  | 0 | 24.25011429          | 27.36825 89        |
| 7070 | 6110 | 9  | 0 | 24.25011429          | 29.32312590.954875 |
| 7071 | 6111 | 9  | 0 | 26.27095714          | 27.36825 90.954875 |
| 7072 | 6112 | 9  | 0 | 26.27095714          | 29.32312589        |
| 7073 | 6113 | 9  | 0 | 24.25011429          | 27.36825 92.90975  |
| 7074 | 6114 | 9  | 0 | 24.25011429          | 29.32312594.864625 |
| 7075 | 6115 | 9  | 0 | 26.27095714          | 27.36825 94.864625 |
| 7076 | 6116 | 9  | 0 | 26.27095714          | 29.32312592.90975  |
| 7077 | 6117 | 9  | 0 | 24.25011429          | 27.36825 96.8195   |
| 7078 | 6118 | 9  | 0 | 24.25011429          | 29.32312598.774375 |
| 7079 | 6119 | 9  | 0 | 26.27095714          | 27.36825 98.774375 |
| 7080 | 6120 | 9  | 0 | 26.27095714          | 29.32312596.8195   |
| 7081 | 6121 | 10 | 0 | 0 0                  | -43.18833333       |
| 7082 | 6122 | 10 | 0 | 0 1.737666667        | -41.45066667       |
| 7083 | 6123 | 10 | 0 | 1.76823750           | -41.45066667       |
| 7084 | 6124 | 10 | 0 | 1.76823751.737666667 | -43.18833333       |
| 7085 | 6125 | 10 | 0 | 0 0                  | -39.713            |
| 7086 | 6126 | 10 | 0 | 0 1.737666667        | -37.97533333       |
| 7087 | 6127 | 10 | 0 | 1.76823750           | -37.97533333       |
| 7088 | 6128 | 10 | 0 | 1.76823751.737666667 | -39.713            |
| 7089 | 6129 | 10 | 0 | 0 0                  | -36.23766667       |
| 7090 | 6130 | 10 | 0 | 0 1.737666667        | -34.5              |

|      |      |    |   |                      |              |              |
|------|------|----|---|----------------------|--------------|--------------|
| 7091 | 6131 | 10 | 0 | 1.76823750           | -34.5        |              |
| 7092 | 6132 | 10 | 0 | 1.76823751.737666667 | -36.23766667 |              |
| 7093 | 6133 | 10 | 0 | 0                    | 3.475333333  | -43.18833333 |
| 7094 | 6134 | 10 | 0 | 0                    | 5.213        | -41.45066667 |
| 7095 | 6135 | 10 | 0 | 1.76823753.475333333 | -41.45066667 |              |
| 7096 | 6136 | 10 | 0 | 1.76823755.213       | -43.18833333 |              |
| 7097 | 6137 | 10 | 0 | 0                    | 3.475333333  | -39.713      |
| 7098 | 6138 | 10 | 0 | 0                    | 5.213        | -37.97533333 |
| 7099 | 6139 | 10 | 0 | 1.76823753.475333333 | -37.97533333 |              |
| 7100 | 6140 | 10 | 0 | 1.76823755.213       | -39.713      |              |
| 7101 | 6141 | 10 | 0 | 0                    | 3.475333333  | -36.23766667 |
| 7102 | 6142 | 10 | 0 | 0                    | 5.213        | -34.5        |
| 7103 | 6143 | 10 | 0 | 1.76823753.475333333 | -34.5        |              |
| 7104 | 6144 | 10 | 0 | 1.76823755.213       | -36.23766667 |              |
| 7105 | 6145 | 10 | 0 | 0                    | 6.950666667  | -43.18833333 |
| 7106 | 6146 | 10 | 0 | 0                    | 8.688333333  | -41.45066667 |
| 7107 | 6147 | 10 | 0 | 1.76823756.950666667 | -41.45066667 |              |
| 7108 | 6148 | 10 | 0 | 1.76823758.688333333 | -43.18833333 |              |
| 7109 | 6149 | 10 | 0 | 0                    | 6.950666667  | -39.713      |
| 7110 | 6150 | 10 | 0 | 0                    | 8.688333333  | -37.97533333 |
| 7111 | 6151 | 10 | 0 | 1.76823756.950666667 | -37.97533333 |              |
| 7112 | 6152 | 10 | 0 | 1.76823758.688333333 | -39.713      |              |
| 7113 | 6153 | 10 | 0 | 0                    | 6.950666667  | -36.23766667 |
| 7114 | 6154 | 10 | 0 | 0                    | 8.688333333  | -34.5        |
| 7115 | 6155 | 10 | 0 | 1.76823756.950666667 | -34.5        |              |
| 7116 | 6156 | 10 | 0 | 1.76823758.688333333 | -36.23766667 |              |
| 7117 | 6157 | 10 | 0 | 0                    | 10.426       | -43.18833333 |
| 7118 | 6158 | 10 | 0 | 0                    | 12.16366667  | -41.45066667 |
| 7119 | 6159 | 10 | 0 | 1.768237510.426      | -41.45066667 |              |
| 7120 | 6160 | 10 | 0 | 1.768237512.16366667 | -43.18833333 |              |
| 7121 | 6161 | 10 | 0 | 0                    | 10.426       | -39.713      |
| 7122 | 6162 | 10 | 0 | 0                    | 12.16366667  | -37.97533333 |
| 7123 | 6163 | 10 | 0 | 1.768237510.426      | -37.97533333 |              |
| 7124 | 6164 | 10 | 0 | 1.768237512.16366667 | -39.713      |              |
| 7125 | 6165 | 10 | 0 | 0                    | 10.426       | -36.23766667 |
| 7126 | 6166 | 10 | 0 | 0                    | 12.16366667  | -34.5        |
| 7127 | 6167 | 10 | 0 | 1.768237510.426      | -34.5        |              |
| 7128 | 6168 | 10 | 0 | 1.768237512.16366667 | -36.23766667 |              |
| 7129 | 6169 | 10 | 0 | 0                    | 13.90133333  | -43.18833333 |
| 7130 | 6170 | 10 | 0 | 0                    | 15.639       | -41.45066667 |
| 7131 | 6171 | 10 | 0 | 1.768237513.90133333 | -41.45066667 |              |
| 7132 | 6172 | 10 | 0 | 1.768237515.639      | -43.18833333 |              |
| 7133 | 6173 | 10 | 0 | 0                    | 13.90133333  | -39.713      |
| 7134 | 6174 | 10 | 0 | 0                    | 15.639       | -37.97533333 |
| 7135 | 6175 | 10 | 0 | 1.768237513.90133333 | -37.97533333 |              |
| 7136 | 6176 | 10 | 0 | 1.768237515.639      | -39.713      |              |
| 7137 | 6177 | 10 | 0 | 0                    | 13.90133333  | -36.23766667 |
| 7138 | 6178 | 10 | 0 | 0                    | 15.639       | -34.5        |
| 7139 | 6179 | 10 | 0 | 1.768237513.90133333 | -34.5        |              |
| 7140 | 6180 | 10 | 0 | 1.768237515.639      | -36.23766667 |              |
| 7141 | 6181 | 10 | 0 | 0                    | 17.37666667  | -43.18833333 |

|      |      |    |   |            |             |              |
|------|------|----|---|------------|-------------|--------------|
| 7142 | 6182 | 10 | 0 | 0          | 19.11433333 | -41.45066667 |
| 7143 | 6183 | 10 | 0 | 1.7682375  | 17.37666667 | -41.45066667 |
| 7144 | 6184 | 10 | 0 | 1.7682375  | 19.11433333 | -43.18833333 |
| 7145 | 6185 | 10 | 0 | 0          | 17.37666667 | -39.713      |
| 7146 | 6186 | 10 | 0 | 0          | 19.11433333 | -37.97533333 |
| 7147 | 6187 | 10 | 0 | 1.7682375  | 17.37666667 | -37.97533333 |
| 7148 | 6188 | 10 | 0 | 1.7682375  | 19.11433333 | -39.713      |
| 7149 | 6189 | 10 | 0 | 0          | 17.37666667 | -36.23766667 |
| 7150 | 6190 | 10 | 0 | 0          | 19.11433333 | -34.5        |
| 7151 | 6191 | 10 | 0 | 1.7682375  | 17.37666667 | -34.5        |
| 7152 | 6192 | 10 | 0 | 1.7682375  | 19.11433333 | -36.23766667 |
| 7153 | 6193 | 10 | 0 | 0          | 20.852      | -43.18833333 |
| 7154 | 6194 | 10 | 0 | 0          | 22.58966667 | -41.45066667 |
| 7155 | 6195 | 10 | 0 | 1.7682375  | 20.852      | -41.45066667 |
| 7156 | 6196 | 10 | 0 | 1.7682375  | 22.58966667 | -43.18833333 |
| 7157 | 6197 | 10 | 0 | 0          | 20.852      | -39.713      |
| 7158 | 6198 | 10 | 0 | 0          | 22.58966667 | -37.97533333 |
| 7159 | 6199 | 10 | 0 | 1.7682375  | 20.852      | -37.97533333 |
| 7160 | 6200 | 10 | 0 | 1.7682375  | 22.58966667 | -39.713      |
| 7161 | 6201 | 10 | 0 | 0          | 20.852      | -36.23766667 |
| 7162 | 6202 | 10 | 0 | 0          | 22.58966667 | -34.5        |
| 7163 | 6203 | 10 | 0 | 1.7682375  | 20.852      | -34.5        |
| 7164 | 6204 | 10 | 0 | 1.7682375  | 22.58966667 | -36.23766667 |
| 7165 | 6205 | 10 | 0 | 0          | 24.32733333 | -43.18833333 |
| 7166 | 6206 | 10 | 0 | 0          | 26.065      | -41.45066667 |
| 7167 | 6207 | 10 | 0 | 1.7682375  | 24.32733333 | -41.45066667 |
| 7168 | 6208 | 10 | 0 | 1.7682375  | 26.065      | -43.18833333 |
| 7169 | 6209 | 10 | 0 | 0          | 24.32733333 | -39.713      |
| 7170 | 6210 | 10 | 0 | 0          | 26.065      | -37.97533333 |
| 7171 | 6211 | 10 | 0 | 1.7682375  | 24.32733333 | -37.97533333 |
| 7172 | 6212 | 10 | 0 | 1.7682375  | 26.065      | -39.713      |
| 7173 | 6213 | 10 | 0 | 0          | 24.32733333 | -36.23766667 |
| 7174 | 6214 | 10 | 0 | 0          | 26.065      | -34.5        |
| 7175 | 6215 | 10 | 0 | 1.7682375  | 24.32733333 | -34.5        |
| 7176 | 6216 | 10 | 0 | 1.7682375  | 26.065      | -36.23766667 |
| 7177 | 6217 | 10 | 0 | 0          | 27.80266667 | -43.18833333 |
| 7178 | 6218 | 10 | 0 | 0          | 29.54033333 | -41.45066667 |
| 7179 | 6219 | 10 | 0 | 1.7682375  | 27.80266667 | -41.45066667 |
| 7180 | 6220 | 10 | 0 | 1.7682375  | 29.54033333 | -43.18833333 |
| 7181 | 6221 | 10 | 0 | 0          | 27.80266667 | -39.713      |
| 7182 | 6222 | 10 | 0 | 0          | 29.54033333 | -37.97533333 |
| 7183 | 6223 | 10 | 0 | 1.7682375  | 27.80266667 | -37.97533333 |
| 7184 | 6224 | 10 | 0 | 1.7682375  | 29.54033333 | -39.713      |
| 7185 | 6225 | 10 | 0 | 0          | 27.80266667 | -36.23766667 |
| 7186 | 6226 | 10 | 0 | 0          | 29.54033333 | -34.5        |
| 7187 | 6227 | 10 | 0 | 1.7682375  | 27.80266667 | -34.5        |
| 7188 | 6228 | 10 | 0 | 1.7682375  | 29.54033333 | -36.23766667 |
| 7189 | 6229 | 10 | 0 | 3.536475   | 0           | -43.18833333 |
| 7190 | 6230 | 10 | 0 | 3.536475   | 1.737666667 | -41.45066667 |
| 7191 | 6231 | 10 | 0 | 5.30471250 |             | -41.45066667 |
| 7192 | 6232 | 10 | 0 | 5.3047125  | 1.737666667 | -43.18833333 |

|      |      |    |   |             |             |              |
|------|------|----|---|-------------|-------------|--------------|
| 7193 | 6233 | 10 | 0 | 3.536475    | 0           | -39.713      |
| 7194 | 6234 | 10 | 0 | 3.536475    | 1.737666667 | -37.97533333 |
| 7195 | 6235 | 10 | 0 | 5.30471250  |             | -37.97533333 |
| 7196 | 6236 | 10 | 0 | 5.30471251  | 1.737666667 | -39.713      |
| 7197 | 6237 | 10 | 0 | 3.536475    | 0           | -36.23766667 |
| 7198 | 6238 | 10 | 0 | 3.536475    | 1.737666667 | -34.5        |
| 7199 | 6239 | 10 | 0 | 5.30471250  |             | -34.5        |
| 7200 | 6240 | 10 | 0 | 5.30471251  | 1.737666667 | -36.23766667 |
| 7201 | 6241 | 10 | 0 | 3.536475    | 3.475333333 | -43.18833333 |
| 7202 | 6242 | 10 | 0 | 3.536475    | 5.213       | -41.45066667 |
| 7203 | 6243 | 10 | 0 | 5.30471253  | 3.475333333 | -41.45066667 |
| 7204 | 6244 | 10 | 0 | 5.30471255  | 5.213       | -43.18833333 |
| 7205 | 6245 | 10 | 0 | 3.536475    | 3.475333333 | -39.713      |
| 7206 | 6246 | 10 | 0 | 3.536475    | 5.213       | -37.97533333 |
| 7207 | 6247 | 10 | 0 | 5.30471253  | 3.475333333 | -37.97533333 |
| 7208 | 6248 | 10 | 0 | 5.30471255  | 5.213       | -39.713      |
| 7209 | 6249 | 10 | 0 | 3.536475    | 3.475333333 | -36.23766667 |
| 7210 | 6250 | 10 | 0 | 3.536475    | 5.213       | -34.5        |
| 7211 | 6251 | 10 | 0 | 5.30471253  | 3.475333333 | -34.5        |
| 7212 | 6252 | 10 | 0 | 5.30471255  | 5.213       | -36.23766667 |
| 7213 | 6253 | 10 | 0 | 3.536475    | 6.950666667 | -43.18833333 |
| 7214 | 6254 | 10 | 0 | 3.536475    | 8.688333333 | -41.45066667 |
| 7215 | 6255 | 10 | 0 | 5.30471256  | 6.950666667 | -41.45066667 |
| 7216 | 6256 | 10 | 0 | 5.30471258  | 6.688333333 | -43.18833333 |
| 7217 | 6257 | 10 | 0 | 3.536475    | 6.950666667 | -39.713      |
| 7218 | 6258 | 10 | 0 | 3.536475    | 8.688333333 | -37.97533333 |
| 7219 | 6259 | 10 | 0 | 5.30471256  | 6.950666667 | -37.97533333 |
| 7220 | 6260 | 10 | 0 | 5.30471258  | 6.688333333 | -39.713      |
| 7221 | 6261 | 10 | 0 | 3.536475    | 6.950666667 | -36.23766667 |
| 7222 | 6262 | 10 | 0 | 3.536475    | 8.688333333 | -34.5        |
| 7223 | 6263 | 10 | 0 | 5.30471256  | 6.950666667 | -34.5        |
| 7224 | 6264 | 10 | 0 | 5.30471258  | 6.688333333 | -36.23766667 |
| 7225 | 6265 | 10 | 0 | 3.536475    | 10.426      | -43.18833333 |
| 7226 | 6266 | 10 | 0 | 3.536475    | 12.16366667 | -41.45066667 |
| 7227 | 6267 | 10 | 0 | 5.304712510 | 4.26        | -41.45066667 |
| 7228 | 6268 | 10 | 0 | 5.304712512 | 1.6366667   | -43.18833333 |
| 7229 | 6269 | 10 | 0 | 3.536475    | 10.426      | -39.713      |
| 7230 | 6270 | 10 | 0 | 3.536475    | 12.16366667 | -37.97533333 |
| 7231 | 6271 | 10 | 0 | 5.304712510 | 4.26        | -37.97533333 |
| 7232 | 6272 | 10 | 0 | 5.304712512 | 1.6366667   | -39.713      |
| 7233 | 6273 | 10 | 0 | 3.536475    | 10.426      | -36.23766667 |
| 7234 | 6274 | 10 | 0 | 3.536475    | 12.16366667 | -34.5        |
| 7235 | 6275 | 10 | 0 | 5.304712510 | 4.26        | -34.5        |
| 7236 | 6276 | 10 | 0 | 5.304712512 | 1.6366667   | -36.23766667 |
| 7237 | 6277 | 10 | 0 | 3.536475    | 13.90133333 | -43.18833333 |
| 7238 | 6278 | 10 | 0 | 3.536475    | 15.639      | -41.45066667 |
| 7239 | 6279 | 10 | 0 | 5.304712513 | 9.0133333   | -41.45066667 |
| 7240 | 6280 | 10 | 0 | 5.304712515 | 6.39        | -43.18833333 |
| 7241 | 6281 | 10 | 0 | 3.536475    | 13.90133333 | -39.713      |
| 7242 | 6282 | 10 | 0 | 3.536475    | 15.639      | -37.97533333 |
| 7243 | 6283 | 10 | 0 | 5.304712513 | 9.0133333   | -37.97533333 |

|      |      |    |   |                       |              |
|------|------|----|---|-----------------------|--------------|
| 7244 | 6284 | 10 | 0 | 5.3047125 15.639      | -39.713      |
| 7245 | 6285 | 10 | 0 | 3.536475 13.90133333  | -36.23766667 |
| 7246 | 6286 | 10 | 0 | 3.536475 15.639       | -34.5        |
| 7247 | 6287 | 10 | 0 | 5.3047125 13.90133333 | -34.5        |
| 7248 | 6288 | 10 | 0 | 5.3047125 15.639      | -36.23766667 |
| 7249 | 6289 | 10 | 0 | 3.536475 17.37666667  | -43.18833333 |
| 7250 | 6290 | 10 | 0 | 3.536475 19.11433333  | -41.45066667 |
| 7251 | 6291 | 10 | 0 | 5.3047125 17.37666667 | -41.45066667 |
| 7252 | 6292 | 10 | 0 | 5.3047125 19.11433333 | -43.18833333 |
| 7253 | 6293 | 10 | 0 | 3.536475 17.37666667  | -39.713      |
| 7254 | 6294 | 10 | 0 | 3.536475 19.11433333  | -37.97533333 |
| 7255 | 6295 | 10 | 0 | 5.3047125 17.37666667 | -37.97533333 |
| 7256 | 6296 | 10 | 0 | 5.3047125 19.11433333 | -39.713      |
| 7257 | 6297 | 10 | 0 | 3.536475 17.37666667  | -36.23766667 |
| 7258 | 6298 | 10 | 0 | 3.536475 19.11433333  | -34.5        |
| 7259 | 6299 | 10 | 0 | 5.3047125 17.37666667 | -34.5        |
| 7260 | 6300 | 10 | 0 | 5.3047125 19.11433333 | -36.23766667 |
| 7261 | 6301 | 10 | 0 | 3.536475 20.852       | -43.18833333 |
| 7262 | 6302 | 10 | 0 | 3.536475 22.58966667  | -41.45066667 |
| 7263 | 6303 | 10 | 0 | 5.3047125 20.852      | -41.45066667 |
| 7264 | 6304 | 10 | 0 | 5.3047125 22.58966667 | -43.18833333 |
| 7265 | 6305 | 10 | 0 | 3.536475 20.852       | -39.713      |
| 7266 | 6306 | 10 | 0 | 3.536475 22.58966667  | -37.97533333 |
| 7267 | 6307 | 10 | 0 | 5.3047125 20.852      | -37.97533333 |
| 7268 | 6308 | 10 | 0 | 5.3047125 22.58966667 | -39.713      |
| 7269 | 6309 | 10 | 0 | 3.536475 20.852       | -36.23766667 |
| 7270 | 6310 | 10 | 0 | 3.536475 22.58966667  | -34.5        |
| 7271 | 6311 | 10 | 0 | 5.3047125 20.852      | -34.5        |
| 7272 | 6312 | 10 | 0 | 5.3047125 22.58966667 | -36.23766667 |
| 7273 | 6313 | 10 | 0 | 3.536475 24.32733333  | -43.18833333 |
| 7274 | 6314 | 10 | 0 | 3.536475 26.065       | -41.45066667 |
| 7275 | 6315 | 10 | 0 | 5.3047125 24.32733333 | -41.45066667 |
| 7276 | 6316 | 10 | 0 | 5.3047125 26.065      | -43.18833333 |
| 7277 | 6317 | 10 | 0 | 3.536475 24.32733333  | -39.713      |
| 7278 | 6318 | 10 | 0 | 3.536475 26.065       | -37.97533333 |
| 7279 | 6319 | 10 | 0 | 5.3047125 24.32733333 | -37.97533333 |
| 7280 | 6320 | 10 | 0 | 5.3047125 26.065      | -39.713      |
| 7281 | 6321 | 10 | 0 | 3.536475 24.32733333  | -36.23766667 |
| 7282 | 6322 | 10 | 0 | 3.536475 26.065       | -34.5        |
| 7283 | 6323 | 10 | 0 | 5.3047125 24.32733333 | -34.5        |
| 7284 | 6324 | 10 | 0 | 5.3047125 26.065      | -36.23766667 |
| 7285 | 6325 | 10 | 0 | 3.536475 27.80266667  | -43.18833333 |
| 7286 | 6326 | 10 | 0 | 3.536475 29.54033333  | -41.45066667 |
| 7287 | 6327 | 10 | 0 | 5.3047125 27.80266667 | -41.45066667 |
| 7288 | 6328 | 10 | 0 | 5.3047125 29.54033333 | -43.18833333 |
| 7289 | 6329 | 10 | 0 | 3.536475 27.80266667  | -39.713      |
| 7290 | 6330 | 10 | 0 | 3.536475 29.54033333  | -37.97533333 |
| 7291 | 6331 | 10 | 0 | 5.3047125 27.80266667 | -37.97533333 |
| 7292 | 6332 | 10 | 0 | 5.3047125 29.54033333 | -39.713      |
| 7293 | 6333 | 10 | 0 | 3.536475 27.80266667  | -36.23766667 |
| 7294 | 6334 | 10 | 0 | 3.536475 29.54033333  | -34.5        |



|      |      |    |   |                      |              |
|------|------|----|---|----------------------|--------------|
| 7295 | 6335 | 10 | 0 | 5.304712527.80266667 | -34.5        |
| 7296 | 6336 | 10 | 0 | 5.304712529.54033333 | -36.23766667 |
| 7297 | 6337 | 10 | 0 | 7.07295 0            | -43.18833333 |
| 7298 | 6338 | 10 | 0 | 7.07295 1.737666667  | -41.45066667 |
| 7299 | 6339 | 10 | 0 | 8.84118750           | -41.45066667 |
| 7300 | 6340 | 10 | 0 | 8.84118751.737666667 | -43.18833333 |
| 7301 | 6341 | 10 | 0 | 7.07295 0            | -39.713      |
| 7302 | 6342 | 10 | 0 | 7.07295 1.737666667  | -37.97533333 |
| 7303 | 6343 | 10 | 0 | 8.84118750           | -37.97533333 |
| 7304 | 6344 | 10 | 0 | 8.84118751.737666667 | -39.713      |
| 7305 | 6345 | 10 | 0 | 7.07295 0            | -36.23766667 |
| 7306 | 6346 | 10 | 0 | 7.07295 1.737666667  | -34.5        |
| 7307 | 6347 | 10 | 0 | 8.84118750           | -34.5        |
| 7308 | 6348 | 10 | 0 | 8.84118751.737666667 | -36.23766667 |
| 7309 | 6349 | 10 | 0 | 7.07295 3.475333333  | -43.18833333 |
| 7310 | 6350 | 10 | 0 | 7.07295 5.213        | -41.45066667 |
| 7311 | 6351 | 10 | 0 | 8.84118753.475333333 | -41.45066667 |
| 7312 | 6352 | 10 | 0 | 8.84118755.213       | -43.18833333 |
| 7313 | 6353 | 10 | 0 | 7.07295 3.475333333  | -39.713      |
| 7314 | 6354 | 10 | 0 | 7.07295 5.213        | -37.97533333 |
| 7315 | 6355 | 10 | 0 | 8.84118753.475333333 | -37.97533333 |
| 7316 | 6356 | 10 | 0 | 8.84118755.213       | -39.713      |
| 7317 | 6357 | 10 | 0 | 7.07295 3.475333333  | -36.23766667 |
| 7318 | 6358 | 10 | 0 | 7.07295 5.213        | -34.5        |
| 7319 | 6359 | 10 | 0 | 8.84118753.475333333 | -34.5        |
| 7320 | 6360 | 10 | 0 | 8.84118755.213       | -36.23766667 |
| 7321 | 6361 | 10 | 0 | 7.07295 6.950666667  | -43.18833333 |
| 7322 | 6362 | 10 | 0 | 7.07295 8.688333333  | -41.45066667 |
| 7323 | 6363 | 10 | 0 | 8.84118756.950666667 | -41.45066667 |
| 7324 | 6364 | 10 | 0 | 8.84118758.688333333 | -43.18833333 |
| 7325 | 6365 | 10 | 0 | 7.07295 6.950666667  | -39.713      |
| 7326 | 6366 | 10 | 0 | 7.07295 8.688333333  | -37.97533333 |
| 7327 | 6367 | 10 | 0 | 8.84118756.950666667 | -37.97533333 |
| 7328 | 6368 | 10 | 0 | 8.84118758.688333333 | -39.713      |
| 7329 | 6369 | 10 | 0 | 7.07295 6.950666667  | -36.23766667 |
| 7330 | 6370 | 10 | 0 | 7.07295 8.688333333  | -34.5        |
| 7331 | 6371 | 10 | 0 | 8.84118756.950666667 | -34.5        |
| 7332 | 6372 | 10 | 0 | 8.84118758.688333333 | -36.23766667 |
| 7333 | 6373 | 10 | 0 | 7.07295 10.426       | -43.18833333 |
| 7334 | 6374 | 10 | 0 | 7.07295 12.16366667  | -41.45066667 |
| 7335 | 6375 | 10 | 0 | 8.841187510.426      | -41.45066667 |
| 7336 | 6376 | 10 | 0 | 8.841187512.16366667 | -43.18833333 |
| 7337 | 6377 | 10 | 0 | 7.07295 10.426       | -39.713      |
| 7338 | 6378 | 10 | 0 | 7.07295 12.16366667  | -37.97533333 |
| 7339 | 6379 | 10 | 0 | 8.841187510.426      | -37.97533333 |
| 7340 | 6380 | 10 | 0 | 8.841187512.16366667 | -39.713      |
| 7341 | 6381 | 10 | 0 | 7.07295 10.426       | -36.23766667 |
| 7342 | 6382 | 10 | 0 | 7.07295 12.16366667  | -34.5        |
| 7343 | 6383 | 10 | 0 | 8.841187510.426      | -34.5        |
| 7344 | 6384 | 10 | 0 | 8.841187512.16366667 | -36.23766667 |
| 7345 | 6385 | 10 | 0 | 7.07295 13.90133333  | -43.18833333 |

|      |      |    |   |           |             |              |
|------|------|----|---|-----------|-------------|--------------|
| 7346 | 6386 | 10 | 0 | 7.07295   | 15.639      | -41.45066667 |
| 7347 | 6387 | 10 | 0 | 8.8411875 | 13.90133333 | -41.45066667 |
| 7348 | 6388 | 10 | 0 | 8.8411875 | 15.639      | -43.18833333 |
| 7349 | 6389 | 10 | 0 | 7.07295   | 13.90133333 | -39.713      |
| 7350 | 6390 | 10 | 0 | 7.07295   | 15.639      | -37.97533333 |
| 7351 | 6391 | 10 | 0 | 8.8411875 | 13.90133333 | -37.97533333 |
| 7352 | 6392 | 10 | 0 | 8.8411875 | 15.639      | -39.713      |
| 7353 | 6393 | 10 | 0 | 7.07295   | 13.90133333 | -36.23766667 |
| 7354 | 6394 | 10 | 0 | 7.07295   | 15.639      | -34.5        |
| 7355 | 6395 | 10 | 0 | 8.8411875 | 13.90133333 | -34.5        |
| 7356 | 6396 | 10 | 0 | 8.8411875 | 15.639      | -36.23766667 |
| 7357 | 6397 | 10 | 0 | 7.07295   | 17.37666667 | -43.18833333 |
| 7358 | 6398 | 10 | 0 | 7.07295   | 19.11433333 | -41.45066667 |
| 7359 | 6399 | 10 | 0 | 8.8411875 | 17.37666667 | -41.45066667 |
| 7360 | 6400 | 10 | 0 | 8.8411875 | 19.11433333 | -43.18833333 |
| 7361 | 6401 | 10 | 0 | 7.07295   | 17.37666667 | -39.713      |
| 7362 | 6402 | 10 | 0 | 7.07295   | 19.11433333 | -37.97533333 |
| 7363 | 6403 | 10 | 0 | 8.8411875 | 17.37666667 | -37.97533333 |
| 7364 | 6404 | 10 | 0 | 8.8411875 | 19.11433333 | -39.713      |
| 7365 | 6405 | 10 | 0 | 7.07295   | 17.37666667 | -36.23766667 |
| 7366 | 6406 | 10 | 0 | 7.07295   | 19.11433333 | -34.5        |
| 7367 | 6407 | 10 | 0 | 8.8411875 | 17.37666667 | -34.5        |
| 7368 | 6408 | 10 | 0 | 8.8411875 | 19.11433333 | -36.23766667 |
| 7369 | 6409 | 10 | 0 | 7.07295   | 20.852      | -43.18833333 |
| 7370 | 6410 | 10 | 0 | 7.07295   | 22.58966667 | -41.45066667 |
| 7371 | 6411 | 10 | 0 | 8.8411875 | 20.852      | -41.45066667 |
| 7372 | 6412 | 10 | 0 | 8.8411875 | 22.58966667 | -43.18833333 |
| 7373 | 6413 | 10 | 0 | 7.07295   | 20.852      | -39.713      |
| 7374 | 6414 | 10 | 0 | 7.07295   | 22.58966667 | -37.97533333 |
| 7375 | 6415 | 10 | 0 | 8.8411875 | 20.852      | -37.97533333 |
| 7376 | 6416 | 10 | 0 | 8.8411875 | 22.58966667 | -39.713      |
| 7377 | 6417 | 10 | 0 | 7.07295   | 20.852      | -36.23766667 |
| 7378 | 6418 | 10 | 0 | 7.07295   | 22.58966667 | -34.5        |
| 7379 | 6419 | 10 | 0 | 8.8411875 | 20.852      | -34.5        |
| 7380 | 6420 | 10 | 0 | 8.8411875 | 22.58966667 | -36.23766667 |
| 7381 | 6421 | 10 | 0 | 7.07295   | 24.32733333 | -43.18833333 |
| 7382 | 6422 | 10 | 0 | 7.07295   | 26.065      | -41.45066667 |
| 7383 | 6423 | 10 | 0 | 8.8411875 | 24.32733333 | -41.45066667 |
| 7384 | 6424 | 10 | 0 | 8.8411875 | 26.065      | -43.18833333 |
| 7385 | 6425 | 10 | 0 | 7.07295   | 24.32733333 | -39.713      |
| 7386 | 6426 | 10 | 0 | 7.07295   | 26.065      | -37.97533333 |
| 7387 | 6427 | 10 | 0 | 8.8411875 | 24.32733333 | -37.97533333 |
| 7388 | 6428 | 10 | 0 | 8.8411875 | 26.065      | -39.713      |
| 7389 | 6429 | 10 | 0 | 7.07295   | 24.32733333 | -36.23766667 |
| 7390 | 6430 | 10 | 0 | 7.07295   | 26.065      | -34.5        |
| 7391 | 6431 | 10 | 0 | 8.8411875 | 24.32733333 | -34.5        |
| 7392 | 6432 | 10 | 0 | 8.8411875 | 26.065      | -36.23766667 |
| 7393 | 6433 | 10 | 0 | 7.07295   | 27.80266667 | -43.18833333 |
| 7394 | 6434 | 10 | 0 | 7.07295   | 29.54033333 | -41.45066667 |
| 7395 | 6435 | 10 | 0 | 8.8411875 | 27.80266667 | -41.45066667 |
| 7396 | 6436 | 10 | 0 | 8.8411875 | 29.54033333 | -43.18833333 |

|      |      |    |   |            |              |              |
|------|------|----|---|------------|--------------|--------------|
| 7397 | 6437 | 10 | 0 | 7.07295    | 27.80266667  | -39.713      |
| 7398 | 6438 | 10 | 0 | 7.07295    | 29.54033333  | -37.97533333 |
| 7399 | 6439 | 10 | 0 | 8.8411875  | 27.80266667  | -37.97533333 |
| 7400 | 6440 | 10 | 0 | 8.8411875  | 29.54033333  | -39.713      |
| 7401 | 6441 | 10 | 0 | 7.07295    | 27.80266667  | -36.23766667 |
| 7402 | 6442 | 10 | 0 | 7.07295    | 29.54033333  | -34.5        |
| 7403 | 6443 | 10 | 0 | 8.8411875  | 27.80266667  | -34.5        |
| 7404 | 6444 | 10 | 0 | 8.8411875  | 29.54033333  | -36.23766667 |
| 7405 | 6445 | 10 | 0 | 10.6094250 | -43.18833333 |              |
| 7406 | 6446 | 10 | 0 | 10.609425  | 1.737666667  | -41.45066667 |
| 7407 | 6447 | 10 | 0 | 12.3776625 | 0            | -41.45066667 |
| 7408 | 6448 | 10 | 0 | 12.3776625 | 1.737666667  | -43.18833333 |
| 7409 | 6449 | 10 | 0 | 10.6094250 | -39.713      |              |
| 7410 | 6450 | 10 | 0 | 10.609425  | 1.737666667  | -37.97533333 |
| 7411 | 6451 | 10 | 0 | 12.3776625 | 0            | -37.97533333 |
| 7412 | 6452 | 10 | 0 | 12.3776625 | 1.737666667  | -39.713      |
| 7413 | 6453 | 10 | 0 | 10.6094250 | -36.23766667 |              |
| 7414 | 6454 | 10 | 0 | 10.609425  | 1.737666667  | -34.5        |
| 7415 | 6455 | 10 | 0 | 12.3776625 | 0            | -34.5        |
| 7416 | 6456 | 10 | 0 | 12.3776625 | 1.737666667  | -36.23766667 |
| 7417 | 6457 | 10 | 0 | 10.609425  | 3.475333333  | -43.18833333 |
| 7418 | 6458 | 10 | 0 | 10.609425  | 5.213        | -41.45066667 |
| 7419 | 6459 | 10 | 0 | 12.3776625 | 3.475333333  | -41.45066667 |
| 7420 | 6460 | 10 | 0 | 12.3776625 | 5.213        | -43.18833333 |
| 7421 | 6461 | 10 | 0 | 10.609425  | 3.475333333  | -39.713      |
| 7422 | 6462 | 10 | 0 | 10.609425  | 5.213        | -37.97533333 |
| 7423 | 6463 | 10 | 0 | 12.3776625 | 3.475333333  | -37.97533333 |
| 7424 | 6464 | 10 | 0 | 12.3776625 | 5.213        | -39.713      |
| 7425 | 6465 | 10 | 0 | 10.609425  | 3.475333333  | -36.23766667 |
| 7426 | 6466 | 10 | 0 | 10.609425  | 5.213        | -34.5        |
| 7427 | 6467 | 10 | 0 | 12.3776625 | 3.475333333  | -34.5        |
| 7428 | 6468 | 10 | 0 | 12.3776625 | 5.213        | -36.23766667 |
| 7429 | 6469 | 10 | 0 | 10.609425  | 6.950666667  | -43.18833333 |
| 7430 | 6470 | 10 | 0 | 10.609425  | 8.688333333  | -41.45066667 |
| 7431 | 6471 | 10 | 0 | 12.3776625 | 6.950666667  | -41.45066667 |
| 7432 | 6472 | 10 | 0 | 12.3776625 | 8.688333333  | -43.18833333 |
| 7433 | 6473 | 10 | 0 | 10.609425  | 6.950666667  | -39.713      |
| 7434 | 6474 | 10 | 0 | 10.609425  | 8.688333333  | -37.97533333 |
| 7435 | 6475 | 10 | 0 | 12.3776625 | 6.950666667  | -37.97533333 |
| 7436 | 6476 | 10 | 0 | 12.3776625 | 8.688333333  | -39.713      |
| 7437 | 6477 | 10 | 0 | 10.609425  | 6.950666667  | -36.23766667 |
| 7438 | 6478 | 10 | 0 | 10.609425  | 8.688333333  | -34.5        |
| 7439 | 6479 | 10 | 0 | 12.3776625 | 6.950666667  | -34.5        |
| 7440 | 6480 | 10 | 0 | 12.3776625 | 8.688333333  | -36.23766667 |
| 7441 | 6481 | 10 | 0 | 10.609425  | 10.426       | -43.18833333 |
| 7442 | 6482 | 10 | 0 | 10.609425  | 12.16366667  | -41.45066667 |
| 7443 | 6483 | 10 | 0 | 12.3776625 | 10.426       | -41.45066667 |
| 7444 | 6484 | 10 | 0 | 12.3776625 | 12.16366667  | -43.18833333 |
| 7445 | 6485 | 10 | 0 | 10.609425  | 10.426       | -39.713      |
| 7446 | 6486 | 10 | 0 | 10.609425  | 12.16366667  | -37.97533333 |
| 7447 | 6487 | 10 | 0 | 12.3776625 | 10.426       | -37.97533333 |

|      |      |    |   |                       |              |              |
|------|------|----|---|-----------------------|--------------|--------------|
| 7448 | 6488 | 10 | 0 | 12.3776625            | 12.16366667  | -39.713      |
| 7449 | 6489 | 10 | 0 | 10.609425 10.426      | -36.23766667 |              |
| 7450 | 6490 | 10 | 0 | 10.609425 12.16366667 | -34.5        |              |
| 7451 | 6491 | 10 | 0 | 12.3776625            | 10.426       | -34.5        |
| 7452 | 6492 | 10 | 0 | 12.3776625            | 12.16366667  | -36.23766667 |
| 7453 | 6493 | 10 | 0 | 10.609425 13.90133333 | -43.18833333 |              |
| 7454 | 6494 | 10 | 0 | 10.609425 15.639      | -41.45066667 |              |
| 7455 | 6495 | 10 | 0 | 12.3776625            | 13.90133333  | -41.45066667 |
| 7456 | 6496 | 10 | 0 | 12.3776625            | 15.639       | -43.18833333 |
| 7457 | 6497 | 10 | 0 | 10.609425 13.90133333 | -39.713      |              |
| 7458 | 6498 | 10 | 0 | 10.609425 15.639      | -37.97533333 |              |
| 7459 | 6499 | 10 | 0 | 12.3776625            | 13.90133333  | -37.97533333 |
| 7460 | 6500 | 10 | 0 | 12.3776625            | 15.639       | -39.713      |
| 7461 | 6501 | 10 | 0 | 10.609425 13.90133333 | -36.23766667 |              |
| 7462 | 6502 | 10 | 0 | 10.609425 15.639      | -34.5        |              |
| 7463 | 6503 | 10 | 0 | 12.3776625            | 13.90133333  | -34.5        |
| 7464 | 6504 | 10 | 0 | 12.3776625            | 15.639       | -36.23766667 |
| 7465 | 6505 | 10 | 0 | 10.609425 17.37666667 | -43.18833333 |              |
| 7466 | 6506 | 10 | 0 | 10.609425 19.11433333 | -41.45066667 |              |
| 7467 | 6507 | 10 | 0 | 12.3776625            | 17.37666667  | -41.45066667 |
| 7468 | 6508 | 10 | 0 | 12.3776625            | 19.11433333  | -43.18833333 |
| 7469 | 6509 | 10 | 0 | 10.609425 17.37666667 | -39.713      |              |
| 7470 | 6510 | 10 | 0 | 10.609425 19.11433333 | -37.97533333 |              |
| 7471 | 6511 | 10 | 0 | 12.3776625            | 17.37666667  | -37.97533333 |
| 7472 | 6512 | 10 | 0 | 12.3776625            | 19.11433333  | -39.713      |
| 7473 | 6513 | 10 | 0 | 10.609425 17.37666667 | -36.23766667 |              |
| 7474 | 6514 | 10 | 0 | 10.609425 19.11433333 | -34.5        |              |
| 7475 | 6515 | 10 | 0 | 12.3776625            | 17.37666667  | -34.5        |
| 7476 | 6516 | 10 | 0 | 12.3776625            | 19.11433333  | -36.23766667 |
| 7477 | 6517 | 10 | 0 | 10.609425 20.852      | -43.18833333 |              |
| 7478 | 6518 | 10 | 0 | 10.609425 22.58966667 | -41.45066667 |              |
| 7479 | 6519 | 10 | 0 | 12.3776625            | 20.852       | -41.45066667 |
| 7480 | 6520 | 10 | 0 | 12.3776625            | 22.58966667  | -43.18833333 |
| 7481 | 6521 | 10 | 0 | 10.609425 20.852      | -39.713      |              |
| 7482 | 6522 | 10 | 0 | 10.609425 22.58966667 | -37.97533333 |              |
| 7483 | 6523 | 10 | 0 | 12.3776625            | 20.852       | -37.97533333 |
| 7484 | 6524 | 10 | 0 | 12.3776625            | 22.58966667  | -39.713      |
| 7485 | 6525 | 10 | 0 | 10.609425 20.852      | -36.23766667 |              |
| 7486 | 6526 | 10 | 0 | 10.609425 22.58966667 | -34.5        |              |
| 7487 | 6527 | 10 | 0 | 12.3776625            | 20.852       | -34.5        |
| 7488 | 6528 | 10 | 0 | 12.3776625            | 22.58966667  | -36.23766667 |
| 7489 | 6529 | 10 | 0 | 10.609425 24.32733333 | -43.18833333 |              |
| 7490 | 6530 | 10 | 0 | 10.609425 26.065      | -41.45066667 |              |
| 7491 | 6531 | 10 | 0 | 12.3776625            | 24.32733333  | -41.45066667 |
| 7492 | 6532 | 10 | 0 | 12.3776625            | 26.065       | -43.18833333 |
| 7493 | 6533 | 10 | 0 | 10.609425 24.32733333 | -39.713      |              |
| 7494 | 6534 | 10 | 0 | 10.609425 26.065      | -37.97533333 |              |
| 7495 | 6535 | 10 | 0 | 12.3776625            | 24.32733333  | -37.97533333 |
| 7496 | 6536 | 10 | 0 | 12.3776625            | 26.065       | -39.713      |
| 7497 | 6537 | 10 | 0 | 10.609425 24.32733333 | -36.23766667 |              |
| 7498 | 6538 | 10 | 0 | 10.609425 26.065      | -34.5        |              |

|      |      |    |   |                      |             |              |
|------|------|----|---|----------------------|-------------|--------------|
| 7499 | 6539 | 10 | 0 | 12.3776625           | 24.32733333 | -34.5        |
| 7500 | 6540 | 10 | 0 | 12.3776625           | 26.065      | -36.23766667 |
| 7501 | 6541 | 10 | 0 | 10.60942527.80266667 |             | -43.18833333 |
| 7502 | 6542 | 10 | 0 | 10.60942529.54033333 |             | -41.45066667 |
| 7503 | 6543 | 10 | 0 | 12.3776625           | 27.80266667 | -41.45066667 |
| 7504 | 6544 | 10 | 0 | 12.3776625           | 29.54033333 | -43.18833333 |
| 7505 | 6545 | 10 | 0 | 10.60942527.80266667 |             | -39.713      |
| 7506 | 6546 | 10 | 0 | 10.60942529.54033333 |             | -37.97533333 |
| 7507 | 6547 | 10 | 0 | 12.3776625           | 27.80266667 | -37.97533333 |
| 7508 | 6548 | 10 | 0 | 12.3776625           | 29.54033333 | -39.713      |
| 7509 | 6549 | 10 | 0 | 10.60942527.80266667 |             | -36.23766667 |
| 7510 | 6550 | 10 | 0 | 10.60942529.54033333 |             | -34.5        |
| 7511 | 6551 | 10 | 0 | 12.3776625           | 27.80266667 | -34.5        |
| 7512 | 6552 | 10 | 0 | 12.3776625           | 29.54033333 | -36.23766667 |
| 7513 | 6553 | 10 | 0 | 14.1459              | 0           | -43.18833333 |
| 7514 | 6554 | 10 | 0 | 14.1459              | 1.737666667 | -41.45066667 |
| 7515 | 6555 | 10 | 0 | 15.9141375           | 0           | -41.45066667 |
| 7516 | 6556 | 10 | 0 | 15.9141375           | 1.737666667 | -43.18833333 |
| 7517 | 6557 | 10 | 0 | 14.1459              | 0           | -39.713      |
| 7518 | 6558 | 10 | 0 | 14.1459              | 1.737666667 | -37.97533333 |
| 7519 | 6559 | 10 | 0 | 15.9141375           | 0           | -37.97533333 |
| 7520 | 6560 | 10 | 0 | 15.9141375           | 1.737666667 | -39.713      |
| 7521 | 6561 | 10 | 0 | 14.1459              | 0           | -36.23766667 |
| 7522 | 6562 | 10 | 0 | 14.1459              | 1.737666667 | -34.5        |
| 7523 | 6563 | 10 | 0 | 15.9141375           | 0           | -34.5        |
| 7524 | 6564 | 10 | 0 | 15.9141375           | 1.737666667 | -36.23766667 |
| 7525 | 6565 | 10 | 0 | 14.1459              | 3.475333333 | -43.18833333 |
| 7526 | 6566 | 10 | 0 | 14.1459              | 5.213       | -41.45066667 |
| 7527 | 6567 | 10 | 0 | 15.9141375           | 3.475333333 | -41.45066667 |
| 7528 | 6568 | 10 | 0 | 15.9141375           | 5.213       | -43.18833333 |
| 7529 | 6569 | 10 | 0 | 14.1459              | 3.475333333 | -39.713      |
| 7530 | 6570 | 10 | 0 | 14.1459              | 5.213       | -37.97533333 |
| 7531 | 6571 | 10 | 0 | 15.9141375           | 3.475333333 | -37.97533333 |
| 7532 | 6572 | 10 | 0 | 15.9141375           | 5.213       | -39.713      |
| 7533 | 6573 | 10 | 0 | 14.1459              | 3.475333333 | -36.23766667 |
| 7534 | 6574 | 10 | 0 | 14.1459              | 5.213       | -34.5        |
| 7535 | 6575 | 10 | 0 | 15.9141375           | 3.475333333 | -34.5        |
| 7536 | 6576 | 10 | 0 | 15.9141375           | 5.213       | -36.23766667 |
| 7537 | 6577 | 10 | 0 | 14.1459              | 6.950666667 | -43.18833333 |
| 7538 | 6578 | 10 | 0 | 14.1459              | 8.688333333 | -41.45066667 |
| 7539 | 6579 | 10 | 0 | 15.9141375           | 6.950666667 | -41.45066667 |
| 7540 | 6580 | 10 | 0 | 15.9141375           | 8.688333333 | -43.18833333 |
| 7541 | 6581 | 10 | 0 | 14.1459              | 6.950666667 | -39.713      |
| 7542 | 6582 | 10 | 0 | 14.1459              | 8.688333333 | -37.97533333 |
| 7543 | 6583 | 10 | 0 | 15.9141375           | 6.950666667 | -37.97533333 |
| 7544 | 6584 | 10 | 0 | 15.9141375           | 8.688333333 | -39.713      |
| 7545 | 6585 | 10 | 0 | 14.1459              | 6.950666667 | -36.23766667 |
| 7546 | 6586 | 10 | 0 | 14.1459              | 8.688333333 | -34.5        |
| 7547 | 6587 | 10 | 0 | 15.9141375           | 6.950666667 | -34.5        |
| 7548 | 6588 | 10 | 0 | 15.9141375           | 8.688333333 | -36.23766667 |
| 7549 | 6589 | 10 | 0 | 14.1459              | 10.426      | -43.18833333 |

|      |      |    |   |            |             |              |
|------|------|----|---|------------|-------------|--------------|
| 7550 | 6590 | 10 | 0 | 14.1459    | 12.16366667 | -41.45066667 |
| 7551 | 6591 | 10 | 0 | 15.9141375 | 10.426      | -41.45066667 |
| 7552 | 6592 | 10 | 0 | 15.9141375 | 12.16366667 | -43.18833333 |
| 7553 | 6593 | 10 | 0 | 14.1459    | 10.426      | -39.713      |
| 7554 | 6594 | 10 | 0 | 14.1459    | 12.16366667 | -37.97533333 |
| 7555 | 6595 | 10 | 0 | 15.9141375 | 10.426      | -37.97533333 |
| 7556 | 6596 | 10 | 0 | 15.9141375 | 12.16366667 | -39.713      |
| 7557 | 6597 | 10 | 0 | 14.1459    | 10.426      | -36.23766667 |
| 7558 | 6598 | 10 | 0 | 14.1459    | 12.16366667 | -34.5        |
| 7559 | 6599 | 10 | 0 | 15.9141375 | 10.426      | -34.5        |
| 7560 | 6600 | 10 | 0 | 15.9141375 | 12.16366667 | -36.23766667 |
| 7561 | 6601 | 10 | 0 | 14.1459    | 13.90133333 | -43.18833333 |
| 7562 | 6602 | 10 | 0 | 14.1459    | 15.639      | -41.45066667 |
| 7563 | 6603 | 10 | 0 | 15.9141375 | 13.90133333 | -41.45066667 |
| 7564 | 6604 | 10 | 0 | 15.9141375 | 15.639      | -43.18833333 |
| 7565 | 6605 | 10 | 0 | 14.1459    | 13.90133333 | -39.713      |
| 7566 | 6606 | 10 | 0 | 14.1459    | 15.639      | -37.97533333 |
| 7567 | 6607 | 10 | 0 | 15.9141375 | 13.90133333 | -37.97533333 |
| 7568 | 6608 | 10 | 0 | 15.9141375 | 15.639      | -39.713      |
| 7569 | 6609 | 10 | 0 | 14.1459    | 13.90133333 | -36.23766667 |
| 7570 | 6610 | 10 | 0 | 14.1459    | 15.639      | -34.5        |
| 7571 | 6611 | 10 | 0 | 15.9141375 | 13.90133333 | -34.5        |
| 7572 | 6612 | 10 | 0 | 15.9141375 | 15.639      | -36.23766667 |
| 7573 | 6613 | 10 | 0 | 14.1459    | 17.37666667 | -43.18833333 |
| 7574 | 6614 | 10 | 0 | 14.1459    | 19.11433333 | -41.45066667 |
| 7575 | 6615 | 10 | 0 | 15.9141375 | 17.37666667 | -41.45066667 |
| 7576 | 6616 | 10 | 0 | 15.9141375 | 19.11433333 | -43.18833333 |
| 7577 | 6617 | 10 | 0 | 14.1459    | 17.37666667 | -39.713      |
| 7578 | 6618 | 10 | 0 | 14.1459    | 19.11433333 | -37.97533333 |
| 7579 | 6619 | 10 | 0 | 15.9141375 | 17.37666667 | -37.97533333 |
| 7580 | 6620 | 10 | 0 | 15.9141375 | 19.11433333 | -39.713      |
| 7581 | 6621 | 10 | 0 | 14.1459    | 17.37666667 | -36.23766667 |
| 7582 | 6622 | 10 | 0 | 14.1459    | 19.11433333 | -34.5        |
| 7583 | 6623 | 10 | 0 | 15.9141375 | 17.37666667 | -34.5        |
| 7584 | 6624 | 10 | 0 | 15.9141375 | 19.11433333 | -36.23766667 |
| 7585 | 6625 | 10 | 0 | 14.1459    | 20.852      | -43.18833333 |
| 7586 | 6626 | 10 | 0 | 14.1459    | 22.58966667 | -41.45066667 |
| 7587 | 6627 | 10 | 0 | 15.9141375 | 20.852      | -41.45066667 |
| 7588 | 6628 | 10 | 0 | 15.9141375 | 22.58966667 | -43.18833333 |
| 7589 | 6629 | 10 | 0 | 14.1459    | 20.852      | -39.713      |
| 7590 | 6630 | 10 | 0 | 14.1459    | 22.58966667 | -37.97533333 |
| 7591 | 6631 | 10 | 0 | 15.9141375 | 20.852      | -37.97533333 |
| 7592 | 6632 | 10 | 0 | 15.9141375 | 22.58966667 | -39.713      |
| 7593 | 6633 | 10 | 0 | 14.1459    | 20.852      | -36.23766667 |
| 7594 | 6634 | 10 | 0 | 14.1459    | 22.58966667 | -34.5        |
| 7595 | 6635 | 10 | 0 | 15.9141375 | 20.852      | -34.5        |
| 7596 | 6636 | 10 | 0 | 15.9141375 | 22.58966667 | -36.23766667 |
| 7597 | 6637 | 10 | 0 | 14.1459    | 24.32733333 | -43.18833333 |
| 7598 | 6638 | 10 | 0 | 14.1459    | 26.065      | -41.45066667 |
| 7599 | 6639 | 10 | 0 | 15.9141375 | 24.32733333 | -41.45066667 |
| 7600 | 6640 | 10 | 0 | 15.9141375 | 26.065      | -43.18833333 |

|      |      |    |   |            |              |              |
|------|------|----|---|------------|--------------|--------------|
| 7601 | 6641 | 10 | 0 | 14.1459    | 24.32733333  | -39.713      |
| 7602 | 6642 | 10 | 0 | 14.1459    | 26.065       | -37.97533333 |
| 7603 | 6643 | 10 | 0 | 15.9141375 | 24.32733333  | -37.97533333 |
| 7604 | 6644 | 10 | 0 | 15.9141375 | 26.065       | -39.713      |
| 7605 | 6645 | 10 | 0 | 14.1459    | 24.32733333  | -36.23766667 |
| 7606 | 6646 | 10 | 0 | 14.1459    | 26.065       | -34.5        |
| 7607 | 6647 | 10 | 0 | 15.9141375 | 24.32733333  | -34.5        |
| 7608 | 6648 | 10 | 0 | 15.9141375 | 26.065       | -36.23766667 |
| 7609 | 6649 | 10 | 0 | 14.1459    | 27.80266667  | -43.18833333 |
| 7610 | 6650 | 10 | 0 | 14.1459    | 29.54033333  | -41.45066667 |
| 7611 | 6651 | 10 | 0 | 15.9141375 | 27.80266667  | -41.45066667 |
| 7612 | 6652 | 10 | 0 | 15.9141375 | 29.54033333  | -43.18833333 |
| 7613 | 6653 | 10 | 0 | 14.1459    | 27.80266667  | -39.713      |
| 7614 | 6654 | 10 | 0 | 14.1459    | 29.54033333  | -37.97533333 |
| 7615 | 6655 | 10 | 0 | 15.9141375 | 27.80266667  | -37.97533333 |
| 7616 | 6656 | 10 | 0 | 15.9141375 | 29.54033333  | -39.713      |
| 7617 | 6657 | 10 | 0 | 14.1459    | 27.80266667  | -36.23766667 |
| 7618 | 6658 | 10 | 0 | 14.1459    | 29.54033333  | -34.5        |
| 7619 | 6659 | 10 | 0 | 15.9141375 | 27.80266667  | -34.5        |
| 7620 | 6660 | 10 | 0 | 15.9141375 | 29.54033333  | -36.23766667 |
| 7621 | 6661 | 10 | 0 | 17.6823750 | -43.18833333 |              |
| 7622 | 6662 | 10 | 0 | 17.6823750 | 1.737666667  | -41.45066667 |
| 7623 | 6663 | 10 | 0 | 19.4506125 | 0            | -41.45066667 |
| 7624 | 6664 | 10 | 0 | 19.4506125 | 1.737666667  | -43.18833333 |
| 7625 | 6665 | 10 | 0 | 17.6823750 | -39.713      |              |
| 7626 | 6666 | 10 | 0 | 17.6823750 | 1.737666667  | -37.97533333 |
| 7627 | 6667 | 10 | 0 | 19.4506125 | 0            | -37.97533333 |
| 7628 | 6668 | 10 | 0 | 19.4506125 | 1.737666667  | -39.713      |
| 7629 | 6669 | 10 | 0 | 17.6823750 | -36.23766667 |              |
| 7630 | 6670 | 10 | 0 | 17.6823750 | 1.737666667  | -34.5        |
| 7631 | 6671 | 10 | 0 | 19.4506125 | 0            | -34.5        |
| 7632 | 6672 | 10 | 0 | 19.4506125 | 1.737666667  | -36.23766667 |
| 7633 | 6673 | 10 | 0 | 17.6823750 | 3.475333333  | -43.18833333 |
| 7634 | 6674 | 10 | 0 | 17.6823750 | 5.213        | -41.45066667 |
| 7635 | 6675 | 10 | 0 | 19.4506125 | 3.475333333  | -41.45066667 |
| 7636 | 6676 | 10 | 0 | 19.4506125 | 5.213        | -43.18833333 |
| 7637 | 6677 | 10 | 0 | 17.6823750 | 3.475333333  | -39.713      |
| 7638 | 6678 | 10 | 0 | 17.6823750 | 5.213        | -37.97533333 |
| 7639 | 6679 | 10 | 0 | 19.4506125 | 3.475333333  | -37.97533333 |
| 7640 | 6680 | 10 | 0 | 19.4506125 | 5.213        | -39.713      |
| 7641 | 6681 | 10 | 0 | 17.6823750 | 3.475333333  | -36.23766667 |
| 7642 | 6682 | 10 | 0 | 17.6823750 | 5.213        | -34.5        |
| 7643 | 6683 | 10 | 0 | 19.4506125 | 3.475333333  | -34.5        |
| 7644 | 6684 | 10 | 0 | 19.4506125 | 5.213        | -36.23766667 |
| 7645 | 6685 | 10 | 0 | 17.6823750 | 6.950666667  | -43.18833333 |
| 7646 | 6686 | 10 | 0 | 17.6823750 | 8.688333333  | -41.45066667 |
| 7647 | 6687 | 10 | 0 | 19.4506125 | 6.950666667  | -41.45066667 |
| 7648 | 6688 | 10 | 0 | 19.4506125 | 8.688333333  | -43.18833333 |
| 7649 | 6689 | 10 | 0 | 17.6823750 | 6.950666667  | -39.713      |
| 7650 | 6690 | 10 | 0 | 17.6823750 | 8.688333333  | -37.97533333 |
| 7651 | 6691 | 10 | 0 | 19.4506125 | 6.950666667  | -37.97533333 |

|      |      |    |   |                      |              |              |
|------|------|----|---|----------------------|--------------|--------------|
| 7652 | 6692 | 10 | 0 | 19.4506125           | 8.688333333  | -39.713      |
| 7653 | 6693 | 10 | 0 | 17.6823756.950666667 | -36.23766667 |              |
| 7654 | 6694 | 10 | 0 | 17.6823758.688333333 | -34.5        |              |
| 7655 | 6695 | 10 | 0 | 19.4506125           | 6.950666667  | -34.5        |
| 7656 | 6696 | 10 | 0 | 19.4506125           | 8.688333333  | -36.23766667 |
| 7657 | 6697 | 10 | 0 | 17.68237510.426      | -43.18833333 |              |
| 7658 | 6698 | 10 | 0 | 17.68237512.16366667 | -41.45066667 |              |
| 7659 | 6699 | 10 | 0 | 19.4506125           | 10.426       | -41.45066667 |
| 7660 | 6700 | 10 | 0 | 19.4506125           | 12.16366667  | -43.18833333 |
| 7661 | 6701 | 10 | 0 | 17.68237510.426      | -39.713      |              |
| 7662 | 6702 | 10 | 0 | 17.68237512.16366667 | -37.97533333 |              |
| 7663 | 6703 | 10 | 0 | 19.4506125           | 10.426       | -37.97533333 |
| 7664 | 6704 | 10 | 0 | 19.4506125           | 12.16366667  | -39.713      |
| 7665 | 6705 | 10 | 0 | 17.68237510.426      | -36.23766667 |              |
| 7666 | 6706 | 10 | 0 | 17.68237512.16366667 | -34.5        |              |
| 7667 | 6707 | 10 | 0 | 19.4506125           | 10.426       | -34.5        |
| 7668 | 6708 | 10 | 0 | 19.4506125           | 12.16366667  | -36.23766667 |
| 7669 | 6709 | 10 | 0 | 17.68237513.90133333 | -43.18833333 |              |
| 7670 | 6710 | 10 | 0 | 17.68237515.639      | -41.45066667 |              |
| 7671 | 6711 | 10 | 0 | 19.4506125           | 13.90133333  | -41.45066667 |
| 7672 | 6712 | 10 | 0 | 19.4506125           | 15.639       | -43.18833333 |
| 7673 | 6713 | 10 | 0 | 17.68237513.90133333 | -39.713      |              |
| 7674 | 6714 | 10 | 0 | 17.68237515.639      | -37.97533333 |              |
| 7675 | 6715 | 10 | 0 | 19.4506125           | 13.90133333  | -37.97533333 |
| 7676 | 6716 | 10 | 0 | 19.4506125           | 15.639       | -39.713      |
| 7677 | 6717 | 10 | 0 | 17.68237513.90133333 | -36.23766667 |              |
| 7678 | 6718 | 10 | 0 | 17.68237515.639      | -34.5        |              |
| 7679 | 6719 | 10 | 0 | 19.4506125           | 13.90133333  | -34.5        |
| 7680 | 6720 | 10 | 0 | 19.4506125           | 15.639       | -36.23766667 |
| 7681 | 6721 | 10 | 0 | 17.68237517.37666667 | -43.18833333 |              |
| 7682 | 6722 | 10 | 0 | 17.68237519.11433333 | -41.45066667 |              |
| 7683 | 6723 | 10 | 0 | 19.4506125           | 17.37666667  | -41.45066667 |
| 7684 | 6724 | 10 | 0 | 19.4506125           | 19.11433333  | -43.18833333 |
| 7685 | 6725 | 10 | 0 | 17.68237517.37666667 | -39.713      |              |
| 7686 | 6726 | 10 | 0 | 17.68237519.11433333 | -37.97533333 |              |
| 7687 | 6727 | 10 | 0 | 19.4506125           | 17.37666667  | -37.97533333 |
| 7688 | 6728 | 10 | 0 | 19.4506125           | 19.11433333  | -39.713      |
| 7689 | 6729 | 10 | 0 | 17.68237517.37666667 | -36.23766667 |              |
| 7690 | 6730 | 10 | 0 | 17.68237519.11433333 | -34.5        |              |
| 7691 | 6731 | 10 | 0 | 19.4506125           | 17.37666667  | -34.5        |
| 7692 | 6732 | 10 | 0 | 19.4506125           | 19.11433333  | -36.23766667 |
| 7693 | 6733 | 10 | 0 | 17.68237520.852      | -43.18833333 |              |
| 7694 | 6734 | 10 | 0 | 17.68237522.58966667 | -41.45066667 |              |
| 7695 | 6735 | 10 | 0 | 19.4506125           | 20.852       | -41.45066667 |
| 7696 | 6736 | 10 | 0 | 19.4506125           | 22.58966667  | -43.18833333 |
| 7697 | 6737 | 10 | 0 | 17.68237520.852      | -39.713      |              |
| 7698 | 6738 | 10 | 0 | 17.68237522.58966667 | -37.97533333 |              |
| 7699 | 6739 | 10 | 0 | 19.4506125           | 20.852       | -37.97533333 |
| 7700 | 6740 | 10 | 0 | 19.4506125           | 22.58966667  | -39.713      |
| 7701 | 6741 | 10 | 0 | 17.68237520.852      | -36.23766667 |              |
| 7702 | 6742 | 10 | 0 | 17.68237522.58966667 | -34.5        |              |



|      |      |    |   |                      |              |              |
|------|------|----|---|----------------------|--------------|--------------|
| 7703 | 6743 | 10 | 0 | 19.4506125           | 20.852       | -34.5        |
| 7704 | 6744 | 10 | 0 | 19.4506125           | 22.58966667  | -36.23766667 |
| 7705 | 6745 | 10 | 0 | 17.68237524.32733333 |              | -43.18833333 |
| 7706 | 6746 | 10 | 0 | 17.68237526.065      | -41.45066667 |              |
| 7707 | 6747 | 10 | 0 | 19.4506125           | 24.32733333  | -41.45066667 |
| 7708 | 6748 | 10 | 0 | 19.4506125           | 26.065       | -43.18833333 |
| 7709 | 6749 | 10 | 0 | 17.68237524.32733333 |              | -39.713      |
| 7710 | 6750 | 10 | 0 | 17.68237526.065      | -37.97533333 |              |
| 7711 | 6751 | 10 | 0 | 19.4506125           | 24.32733333  | -37.97533333 |
| 7712 | 6752 | 10 | 0 | 19.4506125           | 26.065       | -39.713      |
| 7713 | 6753 | 10 | 0 | 17.68237524.32733333 |              | -36.23766667 |
| 7714 | 6754 | 10 | 0 | 17.68237526.065      | -34.5        |              |
| 7715 | 6755 | 10 | 0 | 19.4506125           | 24.32733333  | -34.5        |
| 7716 | 6756 | 10 | 0 | 19.4506125           | 26.065       | -36.23766667 |
| 7717 | 6757 | 10 | 0 | 17.68237527.80266667 |              | -43.18833333 |
| 7718 | 6758 | 10 | 0 | 17.68237529.54033333 |              | -41.45066667 |
| 7719 | 6759 | 10 | 0 | 19.4506125           | 27.80266667  | -41.45066667 |
| 7720 | 6760 | 10 | 0 | 19.4506125           | 29.54033333  | -43.18833333 |
| 7721 | 6761 | 10 | 0 | 17.68237527.80266667 |              | -39.713      |
| 7722 | 6762 | 10 | 0 | 17.68237529.54033333 |              | -37.97533333 |
| 7723 | 6763 | 10 | 0 | 19.4506125           | 27.80266667  | -37.97533333 |
| 7724 | 6764 | 10 | 0 | 19.4506125           | 29.54033333  | -39.713      |
| 7725 | 6765 | 10 | 0 | 17.68237527.80266667 |              | -36.23766667 |
| 7726 | 6766 | 10 | 0 | 17.68237529.54033333 |              | -34.5        |
| 7727 | 6767 | 10 | 0 | 19.4506125           | 27.80266667  | -34.5        |
| 7728 | 6768 | 10 | 0 | 19.4506125           | 29.54033333  | -36.23766667 |
| 7729 | 6769 | 10 | 0 | 21.21885 0           |              | -43.18833333 |
| 7730 | 6770 | 10 | 0 | 21.21885 1.737666667 |              | -41.45066667 |
| 7731 | 6771 | 10 | 0 | 22.9870875           | 0            | -41.45066667 |
| 7732 | 6772 | 10 | 0 | 22.9870875           | 1.737666667  | -43.18833333 |
| 7733 | 6773 | 10 | 0 | 21.21885 0           |              | -39.713      |
| 7734 | 6774 | 10 | 0 | 21.21885 1.737666667 |              | -37.97533333 |
| 7735 | 6775 | 10 | 0 | 22.9870875           | 0            | -37.97533333 |
| 7736 | 6776 | 10 | 0 | 22.9870875           | 1.737666667  | -39.713      |
| 7737 | 6777 | 10 | 0 | 21.21885 0           |              | -36.23766667 |
| 7738 | 6778 | 10 | 0 | 21.21885 1.737666667 |              | -34.5        |
| 7739 | 6779 | 10 | 0 | 22.9870875           | 0            | -34.5        |
| 7740 | 6780 | 10 | 0 | 22.9870875           | 1.737666667  | -36.23766667 |
| 7741 | 6781 | 10 | 0 | 21.21885 3.475333333 |              | -43.18833333 |
| 7742 | 6782 | 10 | 0 | 21.21885 5.213       | -41.45066667 |              |
| 7743 | 6783 | 10 | 0 | 22.9870875           | 3.475333333  | -41.45066667 |
| 7744 | 6784 | 10 | 0 | 22.9870875           | 5.213        | -43.18833333 |
| 7745 | 6785 | 10 | 0 | 21.21885 3.475333333 |              | -39.713      |
| 7746 | 6786 | 10 | 0 | 21.21885 5.213       | -37.97533333 |              |
| 7747 | 6787 | 10 | 0 | 22.9870875           | 3.475333333  | -37.97533333 |
| 7748 | 6788 | 10 | 0 | 22.9870875           | 5.213        | -39.713      |
| 7749 | 6789 | 10 | 0 | 21.21885 3.475333333 |              | -36.23766667 |
| 7750 | 6790 | 10 | 0 | 21.21885 5.213       | -34.5        |              |
| 7751 | 6791 | 10 | 0 | 22.9870875           | 3.475333333  | -34.5        |
| 7752 | 6792 | 10 | 0 | 22.9870875           | 5.213        | -36.23766667 |
| 7753 | 6793 | 10 | 0 | 21.21885 6.950666667 |              | -43.18833333 |

|      |      |    |   |            |             |              |
|------|------|----|---|------------|-------------|--------------|
| 7754 | 6794 | 10 | 0 | 21.21885   | 8.688333333 | -41.45066667 |
| 7755 | 6795 | 10 | 0 | 22.9870875 | 6.950666667 | -41.45066667 |
| 7756 | 6796 | 10 | 0 | 22.9870875 | 8.688333333 | -43.18833333 |
| 7757 | 6797 | 10 | 0 | 21.21885   | 6.950666667 | -39.713      |
| 7758 | 6798 | 10 | 0 | 21.21885   | 8.688333333 | -37.97533333 |
| 7759 | 6799 | 10 | 0 | 22.9870875 | 6.950666667 | -37.97533333 |
| 7760 | 6800 | 10 | 0 | 22.9870875 | 8.688333333 | -39.713      |
| 7761 | 6801 | 10 | 0 | 21.21885   | 6.950666667 | -36.23766667 |
| 7762 | 6802 | 10 | 0 | 21.21885   | 8.688333333 | -34.5        |
| 7763 | 6803 | 10 | 0 | 22.9870875 | 6.950666667 | -34.5        |
| 7764 | 6804 | 10 | 0 | 22.9870875 | 8.688333333 | -36.23766667 |
| 7765 | 6805 | 10 | 0 | 21.21885   | 10.426      | -43.18833333 |
| 7766 | 6806 | 10 | 0 | 21.21885   | 12.16366667 | -41.45066667 |
| 7767 | 6807 | 10 | 0 | 22.9870875 | 10.426      | -41.45066667 |
| 7768 | 6808 | 10 | 0 | 22.9870875 | 12.16366667 | -43.18833333 |
| 7769 | 6809 | 10 | 0 | 21.21885   | 10.426      | -39.713      |
| 7770 | 6810 | 10 | 0 | 21.21885   | 12.16366667 | -37.97533333 |
| 7771 | 6811 | 10 | 0 | 22.9870875 | 10.426      | -37.97533333 |
| 7772 | 6812 | 10 | 0 | 22.9870875 | 12.16366667 | -39.713      |
| 7773 | 6813 | 10 | 0 | 21.21885   | 10.426      | -36.23766667 |
| 7774 | 6814 | 10 | 0 | 21.21885   | 12.16366667 | -34.5        |
| 7775 | 6815 | 10 | 0 | 22.9870875 | 10.426      | -34.5        |
| 7776 | 6816 | 10 | 0 | 22.9870875 | 12.16366667 | -36.23766667 |
| 7777 | 6817 | 10 | 0 | 21.21885   | 13.90133333 | -43.18833333 |
| 7778 | 6818 | 10 | 0 | 21.21885   | 15.639      | -41.45066667 |
| 7779 | 6819 | 10 | 0 | 22.9870875 | 13.90133333 | -41.45066667 |
| 7780 | 6820 | 10 | 0 | 22.9870875 | 15.639      | -43.18833333 |
| 7781 | 6821 | 10 | 0 | 21.21885   | 13.90133333 | -39.713      |
| 7782 | 6822 | 10 | 0 | 21.21885   | 15.639      | -37.97533333 |
| 7783 | 6823 | 10 | 0 | 22.9870875 | 13.90133333 | -37.97533333 |
| 7784 | 6824 | 10 | 0 | 22.9870875 | 15.639      | -39.713      |
| 7785 | 6825 | 10 | 0 | 21.21885   | 13.90133333 | -36.23766667 |
| 7786 | 6826 | 10 | 0 | 21.21885   | 15.639      | -34.5        |
| 7787 | 6827 | 10 | 0 | 22.9870875 | 13.90133333 | -34.5        |
| 7788 | 6828 | 10 | 0 | 22.9870875 | 15.639      | -36.23766667 |
| 7789 | 6829 | 10 | 0 | 21.21885   | 17.37666667 | -43.18833333 |
| 7790 | 6830 | 10 | 0 | 21.21885   | 19.11433333 | -41.45066667 |
| 7791 | 6831 | 10 | 0 | 22.9870875 | 17.37666667 | -41.45066667 |
| 7792 | 6832 | 10 | 0 | 22.9870875 | 19.11433333 | -43.18833333 |
| 7793 | 6833 | 10 | 0 | 21.21885   | 17.37666667 | -39.713      |
| 7794 | 6834 | 10 | 0 | 21.21885   | 19.11433333 | -37.97533333 |
| 7795 | 6835 | 10 | 0 | 22.9870875 | 17.37666667 | -37.97533333 |
| 7796 | 6836 | 10 | 0 | 22.9870875 | 19.11433333 | -39.713      |
| 7797 | 6837 | 10 | 0 | 21.21885   | 17.37666667 | -36.23766667 |
| 7798 | 6838 | 10 | 0 | 21.21885   | 19.11433333 | -34.5        |
| 7799 | 6839 | 10 | 0 | 22.9870875 | 17.37666667 | -34.5        |
| 7800 | 6840 | 10 | 0 | 22.9870875 | 19.11433333 | -36.23766667 |
| 7801 | 6841 | 10 | 0 | 21.21885   | 20.852      | -43.18833333 |
| 7802 | 6842 | 10 | 0 | 21.21885   | 22.58966667 | -41.45066667 |
| 7803 | 6843 | 10 | 0 | 22.9870875 | 20.852      | -41.45066667 |
| 7804 | 6844 | 10 | 0 | 22.9870875 | 22.58966667 | -43.18833333 |

|      |      |    |   |            |             |              |              |
|------|------|----|---|------------|-------------|--------------|--------------|
| 7805 | 6845 | 10 | 0 | 21.21885   | 20.852      | -39.713      |              |
| 7806 | 6846 | 10 | 0 | 21.21885   | 22.58966667 |              | -37.97533333 |
| 7807 | 6847 | 10 | 0 | 22.9870875 | 20.852      |              | -37.97533333 |
| 7808 | 6848 | 10 | 0 | 22.9870875 | 22.58966667 |              | -39.713      |
| 7809 | 6849 | 10 | 0 | 21.21885   | 20.852      | -36.23766667 |              |
| 7810 | 6850 | 10 | 0 | 21.21885   | 22.58966667 |              | -34.5        |
| 7811 | 6851 | 10 | 0 | 22.9870875 | 20.852      |              | -34.5        |
| 7812 | 6852 | 10 | 0 | 22.9870875 | 22.58966667 |              | -36.23766667 |
| 7813 | 6853 | 10 | 0 | 21.21885   | 24.32733333 |              | -43.18833333 |
| 7814 | 6854 | 10 | 0 | 21.21885   | 26.065      | -41.45066667 |              |
| 7815 | 6855 | 10 | 0 | 22.9870875 | 24.32733333 |              | -41.45066667 |
| 7816 | 6856 | 10 | 0 | 22.9870875 | 26.065      | -43.18833333 |              |
| 7817 | 6857 | 10 | 0 | 21.21885   | 24.32733333 |              | -39.713      |
| 7818 | 6858 | 10 | 0 | 21.21885   | 26.065      | -37.97533333 |              |
| 7819 | 6859 | 10 | 0 | 22.9870875 | 24.32733333 |              | -37.97533333 |
| 7820 | 6860 | 10 | 0 | 22.9870875 | 26.065      | -39.713      |              |
| 7821 | 6861 | 10 | 0 | 21.21885   | 24.32733333 |              | -36.23766667 |
| 7822 | 6862 | 10 | 0 | 21.21885   | 26.065      | -34.5        |              |
| 7823 | 6863 | 10 | 0 | 22.9870875 | 24.32733333 |              | -34.5        |
| 7824 | 6864 | 10 | 0 | 22.9870875 | 26.065      | -36.23766667 |              |
| 7825 | 6865 | 10 | 0 | 21.21885   | 27.80266667 |              | -43.18833333 |
| 7826 | 6866 | 10 | 0 | 21.21885   | 29.54033333 |              | -41.45066667 |
| 7827 | 6867 | 10 | 0 | 22.9870875 | 27.80266667 |              | -41.45066667 |
| 7828 | 6868 | 10 | 0 | 22.9870875 | 29.54033333 |              | -43.18833333 |
| 7829 | 6869 | 10 | 0 | 21.21885   | 27.80266667 |              | -39.713      |
| 7830 | 6870 | 10 | 0 | 21.21885   | 29.54033333 |              | -37.97533333 |
| 7831 | 6871 | 10 | 0 | 22.9870875 | 27.80266667 |              | -37.97533333 |
| 7832 | 6872 | 10 | 0 | 22.9870875 | 29.54033333 |              | -39.713      |
| 7833 | 6873 | 10 | 0 | 21.21885   | 27.80266667 |              | -36.23766667 |
| 7834 | 6874 | 10 | 0 | 21.21885   | 29.54033333 |              | -34.5        |
| 7835 | 6875 | 10 | 0 | 22.9870875 | 27.80266667 |              | -34.5        |
| 7836 | 6876 | 10 | 0 | 22.9870875 | 29.54033333 |              | -36.23766667 |
| 7837 | 6877 | 10 | 0 | 24.7553250 |             | -43.18833333 |              |
| 7838 | 6878 | 10 | 0 | 24.755325  | 1.737666667 |              | -41.45066667 |
| 7839 | 6879 | 10 | 0 | 26.5235625 | 0           |              | -41.45066667 |
| 7840 | 6880 | 10 | 0 | 26.5235625 | 1.737666667 |              | -43.18833333 |
| 7841 | 6881 | 10 | 0 | 24.7553250 |             | -39.713      |              |
| 7842 | 6882 | 10 | 0 | 24.755325  | 1.737666667 |              | -37.97533333 |
| 7843 | 6883 | 10 | 0 | 26.5235625 | 0           |              | -37.97533333 |
| 7844 | 6884 | 10 | 0 | 26.5235625 | 1.737666667 |              | -39.713      |
| 7845 | 6885 | 10 | 0 | 24.7553250 |             | -36.23766667 |              |
| 7846 | 6886 | 10 | 0 | 24.755325  | 1.737666667 |              | -34.5        |
| 7847 | 6887 | 10 | 0 | 26.5235625 | 0           |              | -34.5        |
| 7848 | 6888 | 10 | 0 | 26.5235625 | 1.737666667 |              | -36.23766667 |
| 7849 | 6889 | 10 | 0 | 24.755325  | 3.475333333 |              | -43.18833333 |
| 7850 | 6890 | 10 | 0 | 24.755325  | 5.213       |              | -41.45066667 |
| 7851 | 6891 | 10 | 0 | 26.5235625 | 3.475333333 |              | -41.45066667 |
| 7852 | 6892 | 10 | 0 | 26.5235625 | 5.213       |              | -43.18833333 |
| 7853 | 6893 | 10 | 0 | 24.755325  | 3.475333333 |              | -39.713      |
| 7854 | 6894 | 10 | 0 | 24.755325  | 5.213       |              | -37.97533333 |
| 7855 | 6895 | 10 | 0 | 26.5235625 | 3.475333333 |              | -37.97533333 |

|      |      |    |   |                      |              |              |
|------|------|----|---|----------------------|--------------|--------------|
| 7856 | 6896 | 10 | 0 | 26.5235625           | 5.213        | -39.713      |
| 7857 | 6897 | 10 | 0 | 24.7553253.475333333 |              | -36.23766667 |
| 7858 | 6898 | 10 | 0 | 24.7553255.213       | -34.5        |              |
| 7859 | 6899 | 10 | 0 | 26.5235625           | 3.475333333  | -34.5        |
| 7860 | 6900 | 10 | 0 | 26.5235625           | 5.213        | -36.23766667 |
| 7861 | 6901 | 10 | 0 | 24.7553256.950666667 |              | -43.18833333 |
| 7862 | 6902 | 10 | 0 | 24.7553258.688333333 |              | -41.45066667 |
| 7863 | 6903 | 10 | 0 | 26.5235625           | 6.950666667  | -41.45066667 |
| 7864 | 6904 | 10 | 0 | 26.5235625           | 8.688333333  | -43.18833333 |
| 7865 | 6905 | 10 | 0 | 24.7553256.950666667 |              | -39.713      |
| 7866 | 6906 | 10 | 0 | 24.7553258.688333333 |              | -37.97533333 |
| 7867 | 6907 | 10 | 0 | 26.5235625           | 6.950666667  | -37.97533333 |
| 7868 | 6908 | 10 | 0 | 26.5235625           | 8.688333333  | -39.713      |
| 7869 | 6909 | 10 | 0 | 24.7553256.950666667 |              | -36.23766667 |
| 7870 | 6910 | 10 | 0 | 24.7553258.688333333 |              | -34.5        |
| 7871 | 6911 | 10 | 0 | 26.5235625           | 6.950666667  | -34.5        |
| 7872 | 6912 | 10 | 0 | 26.5235625           | 8.688333333  | -36.23766667 |
| 7873 | 6913 | 10 | 0 | 24.75532510.426      | -43.18833333 |              |
| 7874 | 6914 | 10 | 0 | 24.75532512.16366667 |              | -41.45066667 |
| 7875 | 6915 | 10 | 0 | 26.5235625           | 10.426       | -41.45066667 |
| 7876 | 6916 | 10 | 0 | 26.5235625           | 12.16366667  | -43.18833333 |
| 7877 | 6917 | 10 | 0 | 24.75532510.426      | -39.713      |              |
| 7878 | 6918 | 10 | 0 | 24.75532512.16366667 |              | -37.97533333 |
| 7879 | 6919 | 10 | 0 | 26.5235625           | 10.426       | -37.97533333 |
| 7880 | 6920 | 10 | 0 | 26.5235625           | 12.16366667  | -39.713      |
| 7881 | 6921 | 10 | 0 | 24.75532510.426      | -36.23766667 |              |
| 7882 | 6922 | 10 | 0 | 24.75532512.16366667 |              | -34.5        |
| 7883 | 6923 | 10 | 0 | 26.5235625           | 10.426       | -34.5        |
| 7884 | 6924 | 10 | 0 | 26.5235625           | 12.16366667  | -36.23766667 |
| 7885 | 6925 | 10 | 0 | 24.75532513.90133333 |              | -43.18833333 |
| 7886 | 6926 | 10 | 0 | 24.75532515.639      | -41.45066667 |              |
| 7887 | 6927 | 10 | 0 | 26.5235625           | 13.90133333  | -41.45066667 |
| 7888 | 6928 | 10 | 0 | 26.5235625           | 15.639       | -43.18833333 |
| 7889 | 6929 | 10 | 0 | 24.75532513.90133333 |              | -39.713      |
| 7890 | 6930 | 10 | 0 | 24.75532515.639      | -37.97533333 |              |
| 7891 | 6931 | 10 | 0 | 26.5235625           | 13.90133333  | -37.97533333 |
| 7892 | 6932 | 10 | 0 | 26.5235625           | 15.639       | -39.713      |
| 7893 | 6933 | 10 | 0 | 24.75532513.90133333 |              | -36.23766667 |
| 7894 | 6934 | 10 | 0 | 24.75532515.639      | -34.5        |              |
| 7895 | 6935 | 10 | 0 | 26.5235625           | 13.90133333  | -34.5        |
| 7896 | 6936 | 10 | 0 | 26.5235625           | 15.639       | -36.23766667 |
| 7897 | 6937 | 10 | 0 | 24.75532517.37666667 |              | -43.18833333 |
| 7898 | 6938 | 10 | 0 | 24.75532519.11433333 |              | -41.45066667 |
| 7899 | 6939 | 10 | 0 | 26.5235625           | 17.37666667  | -41.45066667 |
| 7900 | 6940 | 10 | 0 | 26.5235625           | 19.11433333  | -43.18833333 |
| 7901 | 6941 | 10 | 0 | 24.75532517.37666667 |              | -39.713      |
| 7902 | 6942 | 10 | 0 | 24.75532519.11433333 |              | -37.97533333 |
| 7903 | 6943 | 10 | 0 | 26.5235625           | 17.37666667  | -37.97533333 |
| 7904 | 6944 | 10 | 0 | 26.5235625           | 19.11433333  | -39.713      |
| 7905 | 6945 | 10 | 0 | 24.75532517.37666667 |              | -36.23766667 |
| 7906 | 6946 | 10 | 0 | 24.75532519.11433333 |              | -34.5        |

|      |      |    |   |                       |              |              |
|------|------|----|---|-----------------------|--------------|--------------|
| 7907 | 6947 | 10 | 0 | 26.5235625            | 17.37666667  | -34.5        |
| 7908 | 6948 | 10 | 0 | 26.5235625            | 19.11433333  | -36.23766667 |
| 7909 | 6949 | 10 | 0 | 24.755325 20.852      | -43.18833333 |              |
| 7910 | 6950 | 10 | 0 | 24.755325 22.58966667 | -41.45066667 |              |
| 7911 | 6951 | 10 | 0 | 26.5235625            | 20.852       | -41.45066667 |
| 7912 | 6952 | 10 | 0 | 26.5235625            | 22.58966667  | -43.18833333 |
| 7913 | 6953 | 10 | 0 | 24.755325 20.852      | -39.713      |              |
| 7914 | 6954 | 10 | 0 | 24.755325 22.58966667 | -37.97533333 |              |
| 7915 | 6955 | 10 | 0 | 26.5235625            | 20.852       | -37.97533333 |
| 7916 | 6956 | 10 | 0 | 26.5235625            | 22.58966667  | -39.713      |
| 7917 | 6957 | 10 | 0 | 24.755325 20.852      | -36.23766667 |              |
| 7918 | 6958 | 10 | 0 | 24.755325 22.58966667 | -34.5        |              |
| 7919 | 6959 | 10 | 0 | 26.5235625            | 20.852       | -34.5        |
| 7920 | 6960 | 10 | 0 | 26.5235625            | 22.58966667  | -36.23766667 |
| 7921 | 6961 | 10 | 0 | 24.755325 24.32733333 | -43.18833333 |              |
| 7922 | 6962 | 10 | 0 | 24.755325 26.065      | -41.45066667 |              |
| 7923 | 6963 | 10 | 0 | 26.5235625            | 24.32733333  | -41.45066667 |
| 7924 | 6964 | 10 | 0 | 26.5235625            | 26.065       | -43.18833333 |
| 7925 | 6965 | 10 | 0 | 24.755325 24.32733333 | -39.713      |              |
| 7926 | 6966 | 10 | 0 | 24.755325 26.065      | -37.97533333 |              |
| 7927 | 6967 | 10 | 0 | 26.5235625            | 24.32733333  | -37.97533333 |
| 7928 | 6968 | 10 | 0 | 26.5235625            | 26.065       | -39.713      |
| 7929 | 6969 | 10 | 0 | 24.755325 24.32733333 | -36.23766667 |              |
| 7930 | 6970 | 10 | 0 | 24.755325 26.065      | -34.5        |              |
| 7931 | 6971 | 10 | 0 | 26.5235625            | 24.32733333  | -34.5        |
| 7932 | 6972 | 10 | 0 | 26.5235625            | 26.065       | -36.23766667 |
| 7933 | 6973 | 10 | 0 | 24.755325 27.80266667 | -43.18833333 |              |
| 7934 | 6974 | 10 | 0 | 24.755325 29.54033333 | -41.45066667 |              |
| 7935 | 6975 | 10 | 0 | 26.5235625            | 27.80266667  | -41.45066667 |
| 7936 | 6976 | 10 | 0 | 26.5235625            | 29.54033333  | -43.18833333 |
| 7937 | 6977 | 10 | 0 | 24.755325 27.80266667 | -39.713      |              |
| 7938 | 6978 | 10 | 0 | 24.755325 29.54033333 | -37.97533333 |              |
| 7939 | 6979 | 10 | 0 | 26.5235625            | 27.80266667  | -37.97533333 |
| 7940 | 6980 | 10 | 0 | 26.5235625            | 29.54033333  | -39.713      |
| 7941 | 6981 | 10 | 0 | 24.755325 27.80266667 | -36.23766667 |              |
| 7942 | 6982 | 10 | 0 | 24.755325 29.54033333 | -34.5        |              |
| 7943 | 6983 | 10 | 0 | 26.5235625            | 27.80266667  | -34.5        |
| 7944 | 6984 | 10 | 0 | 26.5235625            | 29.54033333  | -36.23766667 |

Bonds

|    |   |      |      |
|----|---|------|------|
| 1  | 1 | 4141 | 4898 |
| 2  | 1 | 4141 | 4901 |
| 3  | 1 | 4141 | 4914 |
| 4  | 1 | 4141 | 4917 |
| 5  | 1 | 4141 | 4929 |
| 6  | 1 | 4142 | 4897 |
| 7  | 1 | 4142 | 4900 |
| 8  | 1 | 4142 | 4909 |
| 9  | 1 | 4142 | 4928 |
| 10 | 1 | 4143 | 4902 |

|    |   |      |      |
|----|---|------|------|
| 11 | 1 | 4143 | 4905 |
| 12 | 1 | 4144 | 4904 |
| 13 | 1 | 4144 | 4907 |
| 14 | 1 | 4144 | 4920 |
| 15 | 1 | 4144 | 4923 |
| 16 | 1 | 4144 | 4935 |
| 17 | 1 | 4145 | 4903 |
| 18 | 1 | 4145 | 4906 |
| 19 | 1 | 4145 | 4911 |
| 20 | 1 | 4145 | 4934 |
| 21 | 1 | 4146 | 4899 |
| 22 | 1 | 4146 | 4908 |
| 23 | 1 | 4147 | 4898 |
| 24 | 1 | 4147 | 4926 |
| 25 | 1 | 4147 | 4929 |
| 26 | 1 | 4147 | 4941 |
| 27 | 1 | 4148 | 4904 |
| 28 | 1 | 4148 | 4932 |
| 29 | 1 | 4148 | 4935 |
| 30 | 1 | 4148 | 4947 |
| 31 | 1 | 4149 | 4914 |
| 32 | 1 | 4149 | 4917 |
| 33 | 1 | 4149 | 4954 |
| 34 | 1 | 4149 | 4957 |
| 35 | 1 | 4149 | 4969 |
| 36 | 1 | 4150 | 4897 |
| 37 | 1 | 4150 | 4913 |
| 38 | 1 | 4150 | 4916 |
| 39 | 1 | 4150 | 4925 |
| 40 | 1 | 4150 | 4928 |
| 41 | 1 | 4150 | 4968 |
| 42 | 1 | 4151 | 4902 |
| 43 | 1 | 4151 | 4918 |
| 44 | 1 | 4151 | 4921 |
| 45 | 1 | 4152 | 4920 |
| 46 | 1 | 4152 | 4923 |
| 47 | 1 | 4152 | 4960 |
| 48 | 1 | 4152 | 4963 |
| 49 | 1 | 4152 | 4975 |
| 50 | 1 | 4153 | 4903 |
| 51 | 1 | 4153 | 4919 |
| 52 | 1 | 4153 | 4922 |
| 53 | 1 | 4153 | 4931 |
| 54 | 1 | 4153 | 4934 |
| 55 | 1 | 4153 | 4974 |
| 56 | 1 | 4154 | 4908 |
| 57 | 1 | 4154 | 4915 |
| 58 | 1 | 4154 | 4924 |
| 59 | 1 | 4155 | 4914 |
| 60 | 1 | 4155 | 4926 |
| 61 | 1 | 4155 | 4929 |

|     |   |      |      |
|-----|---|------|------|
| 62  | 1 | 4155 | 4966 |
| 63  | 1 | 4155 | 4969 |
| 64  | 1 | 4155 | 4981 |
| 65  | 1 | 4156 | 4909 |
| 66  | 1 | 4156 | 4925 |
| 67  | 1 | 4156 | 4928 |
| 68  | 1 | 4156 | 4937 |
| 69  | 1 | 4156 | 4940 |
| 70  | 1 | 4156 | 4980 |
| 71  | 1 | 4157 | 4902 |
| 72  | 1 | 4157 | 4905 |
| 73  | 1 | 4157 | 4910 |
| 74  | 1 | 4157 | 4921 |
| 75  | 1 | 4157 | 4930 |
| 76  | 1 | 4157 | 4933 |
| 77  | 1 | 4158 | 4920 |
| 78  | 1 | 4158 | 4932 |
| 79  | 1 | 4158 | 4935 |
| 80  | 1 | 4158 | 4972 |
| 81  | 1 | 4158 | 4975 |
| 82  | 1 | 4158 | 4987 |
| 83  | 1 | 4159 | 4911 |
| 84  | 1 | 4159 | 4931 |
| 85  | 1 | 4159 | 4934 |
| 86  | 1 | 4159 | 4943 |
| 87  | 1 | 4159 | 4946 |
| 88  | 1 | 4159 | 4986 |
| 89  | 1 | 4160 | 4899 |
| 90  | 1 | 4160 | 4908 |
| 91  | 1 | 4160 | 4912 |
| 92  | 1 | 4160 | 4915 |
| 93  | 1 | 4160 | 4927 |
| 94  | 1 | 4160 | 4936 |
| 95  | 1 | 4161 | 4926 |
| 96  | 1 | 4161 | 4938 |
| 97  | 1 | 4161 | 4941 |
| 98  | 1 | 4161 | 4978 |
| 99  | 1 | 4161 | 4981 |
| 100 | 1 | 4161 | 4993 |
| 101 | 1 | 4162 | 4937 |
| 102 | 1 | 4162 | 4940 |
| 103 | 1 | 4162 | 4949 |
| 104 | 1 | 4162 | 4992 |
| 105 | 1 | 4163 | 4910 |
| 106 | 1 | 4163 | 4933 |
| 107 | 1 | 4163 | 4942 |
| 108 | 1 | 4163 | 4945 |
| 109 | 1 | 4164 | 4932 |
| 110 | 1 | 4164 | 4944 |
| 111 | 1 | 4164 | 4947 |
| 112 | 1 | 4164 | 4984 |

|     |   |      |      |
|-----|---|------|------|
| 113 | 1 | 4164 | 4987 |
| 114 | 1 | 4164 | 4999 |
| 115 | 1 | 4165 | 4943 |
| 116 | 1 | 4165 | 4946 |
| 117 | 1 | 4165 | 4951 |
| 118 | 1 | 4165 | 4998 |
| 119 | 1 | 4166 | 4912 |
| 120 | 1 | 4166 | 4927 |
| 121 | 1 | 4166 | 4939 |
| 122 | 1 | 4166 | 4948 |
| 123 | 1 | 4167 | 4938 |
| 124 | 1 | 4167 | 4990 |
| 125 | 1 | 4167 | 4993 |
| 126 | 1 | 4167 | 5005 |
| 127 | 1 | 4168 | 4944 |
| 128 | 1 | 4168 | 4996 |
| 129 | 1 | 4168 | 4999 |
| 130 | 1 | 4168 | 5011 |
| 131 | 1 | 4169 | 4954 |
| 132 | 1 | 4169 | 4957 |
| 133 | 1 | 4169 | 5018 |
| 134 | 1 | 4169 | 5021 |
| 135 | 1 | 4169 | 5033 |
| 136 | 1 | 4170 | 4913 |
| 137 | 1 | 4170 | 4953 |
| 138 | 1 | 4170 | 4956 |
| 139 | 1 | 4170 | 4965 |
| 140 | 1 | 4170 | 4968 |
| 141 | 1 | 4170 | 5032 |
| 142 | 1 | 4171 | 4918 |
| 143 | 1 | 4171 | 4958 |
| 144 | 1 | 4171 | 4961 |
| 145 | 1 | 4172 | 4960 |
| 146 | 1 | 4172 | 4963 |
| 147 | 1 | 4172 | 5024 |
| 148 | 1 | 4172 | 5027 |
| 149 | 1 | 4172 | 5039 |
| 150 | 1 | 4173 | 4919 |
| 151 | 1 | 4173 | 4959 |
| 152 | 1 | 4173 | 4962 |
| 153 | 1 | 4173 | 4971 |
| 154 | 1 | 4173 | 4974 |
| 155 | 1 | 4173 | 5038 |
| 156 | 1 | 4174 | 4924 |
| 157 | 1 | 4174 | 4955 |
| 158 | 1 | 4174 | 4964 |
| 159 | 1 | 4175 | 4954 |
| 160 | 1 | 4175 | 4966 |
| 161 | 1 | 4175 | 4969 |
| 162 | 1 | 4175 | 5030 |
| 163 | 1 | 4175 | 5033 |



|     |   |      |      |
|-----|---|------|------|
| 164 | 1 | 4175 | 5045 |
| 165 | 1 | 4176 | 4925 |
| 166 | 1 | 4176 | 4965 |
| 167 | 1 | 4176 | 4968 |
| 168 | 1 | 4176 | 4977 |
| 169 | 1 | 4176 | 4980 |
| 170 | 1 | 4176 | 5044 |
| 171 | 1 | 4177 | 4918 |
| 172 | 1 | 4177 | 4921 |
| 173 | 1 | 4177 | 4930 |
| 174 | 1 | 4177 | 4961 |
| 175 | 1 | 4177 | 4970 |
| 176 | 1 | 4177 | 4973 |
| 177 | 1 | 4178 | 4960 |
| 178 | 1 | 4178 | 4972 |
| 179 | 1 | 4178 | 4975 |
| 180 | 1 | 4178 | 5036 |
| 181 | 1 | 4178 | 5039 |
| 182 | 1 | 4178 | 5051 |
| 183 | 1 | 4179 | 4931 |
| 184 | 1 | 4179 | 4971 |
| 185 | 1 | 4179 | 4974 |
| 186 | 1 | 4179 | 4983 |
| 187 | 1 | 4179 | 4986 |
| 188 | 1 | 4179 | 5050 |
| 189 | 1 | 4180 | 4915 |
| 190 | 1 | 4180 | 4924 |
| 191 | 1 | 4180 | 4936 |
| 192 | 1 | 4180 | 4955 |
| 193 | 1 | 4180 | 4967 |
| 194 | 1 | 4180 | 4976 |
| 195 | 1 | 4181 | 4966 |
| 196 | 1 | 4181 | 4978 |
| 197 | 1 | 4181 | 4981 |
| 198 | 1 | 4181 | 5042 |
| 199 | 1 | 4181 | 5045 |
| 200 | 1 | 4181 | 5057 |
| 201 | 1 | 4182 | 4937 |
| 202 | 1 | 4182 | 4977 |
| 203 | 1 | 4182 | 4980 |
| 204 | 1 | 4182 | 4989 |
| 205 | 1 | 4182 | 4992 |
| 206 | 1 | 4182 | 5056 |
| 207 | 1 | 4183 | 4930 |
| 208 | 1 | 4183 | 4933 |
| 209 | 1 | 4183 | 4942 |
| 210 | 1 | 4183 | 4973 |
| 211 | 1 | 4183 | 4982 |
| 212 | 1 | 4183 | 4985 |
| 213 | 1 | 4184 | 4972 |
| 214 | 1 | 4184 | 4984 |

|     |   |      |      |
|-----|---|------|------|
| 215 | 1 | 4184 | 4987 |
| 216 | 1 | 4184 | 5048 |
| 217 | 1 | 4184 | 5051 |
| 218 | 1 | 4184 | 5063 |
| 219 | 1 | 4185 | 4943 |
| 220 | 1 | 4185 | 4983 |
| 221 | 1 | 4185 | 4986 |
| 222 | 1 | 4185 | 4995 |
| 223 | 1 | 4185 | 4998 |
| 224 | 1 | 4185 | 5062 |
| 225 | 1 | 4186 | 4927 |
| 226 | 1 | 4186 | 4936 |
| 227 | 1 | 4186 | 4948 |
| 228 | 1 | 4186 | 4967 |
| 229 | 1 | 4186 | 4979 |
| 230 | 1 | 4186 | 4988 |
| 231 | 1 | 4187 | 4978 |
| 232 | 1 | 4187 | 4990 |
| 233 | 1 | 4187 | 4993 |
| 234 | 1 | 4187 | 5054 |
| 235 | 1 | 4187 | 5057 |
| 236 | 1 | 4187 | 5069 |
| 237 | 1 | 4188 | 4949 |
| 238 | 1 | 4188 | 4989 |
| 239 | 1 | 4188 | 4992 |
| 240 | 1 | 4188 | 5001 |
| 241 | 1 | 4188 | 5004 |
| 242 | 1 | 4188 | 5068 |
| 243 | 1 | 4189 | 4942 |
| 244 | 1 | 4189 | 4945 |
| 245 | 1 | 4189 | 4950 |
| 246 | 1 | 4189 | 4985 |
| 247 | 1 | 4189 | 4994 |
| 248 | 1 | 4189 | 4997 |
| 249 | 1 | 4190 | 4984 |
| 250 | 1 | 4190 | 4996 |
| 251 | 1 | 4190 | 4999 |
| 252 | 1 | 4190 | 5060 |
| 253 | 1 | 4190 | 5063 |
| 254 | 1 | 4190 | 5075 |
| 255 | 1 | 4191 | 4951 |
| 256 | 1 | 4191 | 4995 |
| 257 | 1 | 4191 | 4998 |
| 258 | 1 | 4191 | 5007 |
| 259 | 1 | 4191 | 5010 |
| 260 | 1 | 4191 | 5074 |
| 261 | 1 | 4192 | 4939 |
| 262 | 1 | 4192 | 4948 |
| 263 | 1 | 4192 | 4952 |
| 264 | 1 | 4192 | 4979 |
| 265 | 1 | 4192 | 4991 |

|     |   |      |      |
|-----|---|------|------|
| 266 | 1 | 4192 | 5000 |
| 267 | 1 | 4193 | 4990 |
| 268 | 1 | 4193 | 5002 |
| 269 | 1 | 4193 | 5005 |
| 270 | 1 | 4193 | 5066 |
| 271 | 1 | 4193 | 5069 |
| 272 | 1 | 4193 | 5081 |
| 273 | 1 | 4194 | 5001 |
| 274 | 1 | 4194 | 5004 |
| 275 | 1 | 4194 | 5013 |
| 276 | 1 | 4194 | 5080 |
| 277 | 1 | 4195 | 4950 |
| 278 | 1 | 4195 | 4997 |
| 279 | 1 | 4195 | 5006 |
| 280 | 1 | 4195 | 5009 |
| 281 | 1 | 4196 | 4996 |
| 282 | 1 | 4196 | 5008 |
| 283 | 1 | 4196 | 5011 |
| 284 | 1 | 4196 | 5072 |
| 285 | 1 | 4196 | 5075 |
| 286 | 1 | 4196 | 5087 |
| 287 | 1 | 4197 | 5007 |
| 288 | 1 | 4197 | 5010 |
| 289 | 1 | 4197 | 5015 |
| 290 | 1 | 4197 | 5086 |
| 291 | 1 | 4198 | 4952 |
| 292 | 1 | 4198 | 4991 |
| 293 | 1 | 4198 | 5003 |
| 294 | 1 | 4198 | 5012 |
| 295 | 1 | 4199 | 5002 |
| 296 | 1 | 4199 | 5078 |
| 297 | 1 | 4199 | 5081 |
| 298 | 1 | 4199 | 5093 |
| 299 | 1 | 4200 | 5008 |
| 300 | 1 | 4200 | 5084 |
| 301 | 1 | 4200 | 5087 |
| 302 | 1 | 4200 | 5099 |
| 303 | 1 | 4201 | 5018 |
| 304 | 1 | 4201 | 5021 |
| 305 | 1 | 4201 | 5106 |
| 306 | 1 | 4201 | 5109 |
| 307 | 1 | 4201 | 5121 |
| 308 | 1 | 4202 | 4953 |
| 309 | 1 | 4202 | 5017 |
| 310 | 1 | 4202 | 5020 |
| 311 | 1 | 4202 | 5029 |
| 312 | 1 | 4202 | 5032 |
| 313 | 1 | 4202 | 5120 |
| 314 | 1 | 4203 | 4958 |
| 315 | 1 | 4203 | 5022 |
| 316 | 1 | 4203 | 5025 |

|     |   |      |      |
|-----|---|------|------|
| 317 | 1 | 4204 | 5024 |
| 318 | 1 | 4204 | 5027 |
| 319 | 1 | 4204 | 5112 |
| 320 | 1 | 4204 | 5115 |
| 321 | 1 | 4204 | 5127 |
| 322 | 1 | 4205 | 4959 |
| 323 | 1 | 4205 | 5023 |
| 324 | 1 | 4205 | 5026 |
| 325 | 1 | 4205 | 5035 |
| 326 | 1 | 4205 | 5038 |
| 327 | 1 | 4205 | 5126 |
| 328 | 1 | 4206 | 4964 |
| 329 | 1 | 4206 | 5019 |
| 330 | 1 | 4206 | 5028 |
| 331 | 1 | 4207 | 5018 |
| 332 | 1 | 4207 | 5030 |
| 333 | 1 | 4207 | 5033 |
| 334 | 1 | 4207 | 5118 |
| 335 | 1 | 4207 | 5121 |
| 336 | 1 | 4207 | 5133 |
| 337 | 1 | 4208 | 4965 |
| 338 | 1 | 4208 | 5029 |
| 339 | 1 | 4208 | 5032 |
| 340 | 1 | 4208 | 5041 |
| 341 | 1 | 4208 | 5044 |
| 342 | 1 | 4208 | 5132 |
| 343 | 1 | 4209 | 4958 |
| 344 | 1 | 4209 | 4961 |
| 345 | 1 | 4209 | 4970 |
| 346 | 1 | 4209 | 5025 |
| 347 | 1 | 4209 | 5034 |
| 348 | 1 | 4209 | 5037 |
| 349 | 1 | 4210 | 5024 |
| 350 | 1 | 4210 | 5036 |
| 351 | 1 | 4210 | 5039 |
| 352 | 1 | 4210 | 5124 |
| 353 | 1 | 4210 | 5127 |
| 354 | 1 | 4210 | 5139 |
| 355 | 1 | 4211 | 4971 |
| 356 | 1 | 4211 | 5035 |
| 357 | 1 | 4211 | 5038 |
| 358 | 1 | 4211 | 5047 |
| 359 | 1 | 4211 | 5050 |
| 360 | 1 | 4211 | 5138 |
| 361 | 1 | 4212 | 4955 |
| 362 | 1 | 4212 | 4964 |
| 363 | 1 | 4212 | 4976 |
| 364 | 1 | 4212 | 5019 |
| 365 | 1 | 4212 | 5031 |
| 366 | 1 | 4212 | 5040 |
| 367 | 1 | 4213 | 5030 |

|     |   |      |      |
|-----|---|------|------|
| 368 | 1 | 4213 | 5042 |
| 369 | 1 | 4213 | 5045 |
| 370 | 1 | 4213 | 5130 |
| 371 | 1 | 4213 | 5133 |
| 372 | 1 | 4213 | 5145 |
| 373 | 1 | 4214 | 4977 |
| 374 | 1 | 4214 | 5041 |
| 375 | 1 | 4214 | 5044 |
| 376 | 1 | 4214 | 5053 |
| 377 | 1 | 4214 | 5056 |
| 378 | 1 | 4214 | 5144 |
| 379 | 1 | 4215 | 4970 |
| 380 | 1 | 4215 | 4973 |
| 381 | 1 | 4215 | 4982 |
| 382 | 1 | 4215 | 5037 |
| 383 | 1 | 4215 | 5046 |
| 384 | 1 | 4215 | 5049 |
| 385 | 1 | 4216 | 5036 |
| 386 | 1 | 4216 | 5048 |
| 387 | 1 | 4216 | 5051 |
| 388 | 1 | 4216 | 5136 |
| 389 | 1 | 4216 | 5139 |
| 390 | 1 | 4216 | 5151 |
| 391 | 1 | 4217 | 4983 |
| 392 | 1 | 4217 | 5047 |
| 393 | 1 | 4217 | 5050 |
| 394 | 1 | 4217 | 5059 |
| 395 | 1 | 4217 | 5062 |
| 396 | 1 | 4217 | 5150 |
| 397 | 1 | 4218 | 4967 |
| 398 | 1 | 4218 | 4976 |
| 399 | 1 | 4218 | 4988 |
| 400 | 1 | 4218 | 5031 |
| 401 | 1 | 4218 | 5043 |
| 402 | 1 | 4218 | 5052 |
| 403 | 1 | 4219 | 5042 |
| 404 | 1 | 4219 | 5054 |
| 405 | 1 | 4219 | 5057 |
| 406 | 1 | 4219 | 5142 |
| 407 | 1 | 4219 | 5145 |
| 408 | 1 | 4219 | 5157 |
| 409 | 1 | 4220 | 4989 |
| 410 | 1 | 4220 | 5053 |
| 411 | 1 | 4220 | 5056 |
| 412 | 1 | 4220 | 5065 |
| 413 | 1 | 4220 | 5068 |
| 414 | 1 | 4220 | 5156 |
| 415 | 1 | 4221 | 4982 |
| 416 | 1 | 4221 | 4985 |
| 417 | 1 | 4221 | 4994 |
| 418 | 1 | 4221 | 5049 |

|     |   |      |      |
|-----|---|------|------|
| 419 | 1 | 4221 | 5058 |
| 420 | 1 | 4221 | 5061 |
| 421 | 1 | 4222 | 5048 |
| 422 | 1 | 4222 | 5060 |
| 423 | 1 | 4222 | 5063 |
| 424 | 1 | 4222 | 5148 |
| 425 | 1 | 4222 | 5151 |
| 426 | 1 | 4222 | 5163 |
| 427 | 1 | 4223 | 4995 |
| 428 | 1 | 4223 | 5059 |
| 429 | 1 | 4223 | 5062 |
| 430 | 1 | 4223 | 5071 |
| 431 | 1 | 4223 | 5074 |
| 432 | 1 | 4223 | 5162 |
| 433 | 1 | 4224 | 4979 |
| 434 | 1 | 4224 | 4988 |
| 435 | 1 | 4224 | 5000 |
| 436 | 1 | 4224 | 5043 |
| 437 | 1 | 4224 | 5055 |
| 438 | 1 | 4224 | 5064 |
| 439 | 1 | 4225 | 5054 |
| 440 | 1 | 4225 | 5066 |
| 441 | 1 | 4225 | 5069 |
| 442 | 1 | 4225 | 5154 |
| 443 | 1 | 4225 | 5157 |
| 444 | 1 | 4225 | 5169 |
| 445 | 1 | 4226 | 5001 |
| 446 | 1 | 4226 | 5065 |
| 447 | 1 | 4226 | 5068 |
| 448 | 1 | 4226 | 5077 |
| 449 | 1 | 4226 | 5080 |
| 450 | 1 | 4226 | 5168 |
| 451 | 1 | 4227 | 4994 |
| 452 | 1 | 4227 | 4997 |
| 453 | 1 | 4227 | 5006 |
| 454 | 1 | 4227 | 5061 |
| 455 | 1 | 4227 | 5070 |
| 456 | 1 | 4227 | 5073 |
| 457 | 1 | 4228 | 5060 |
| 458 | 1 | 4228 | 5072 |
| 459 | 1 | 4228 | 5075 |
| 460 | 1 | 4228 | 5160 |
| 461 | 1 | 4228 | 5163 |
| 462 | 1 | 4228 | 5175 |
| 463 | 1 | 4229 | 5007 |
| 464 | 1 | 4229 | 5071 |
| 465 | 1 | 4229 | 5074 |
| 466 | 1 | 4229 | 5083 |
| 467 | 1 | 4229 | 5086 |
| 468 | 1 | 4229 | 5174 |
| 469 | 1 | 4230 | 4991 |

|     |   |      |      |
|-----|---|------|------|
| 470 | 1 | 4230 | 5000 |
| 471 | 1 | 4230 | 5012 |
| 472 | 1 | 4230 | 5055 |
| 473 | 1 | 4230 | 5067 |
| 474 | 1 | 4230 | 5076 |
| 475 | 1 | 4231 | 5066 |
| 476 | 1 | 4231 | 5078 |
| 477 | 1 | 4231 | 5081 |
| 478 | 1 | 4231 | 5166 |
| 479 | 1 | 4231 | 5169 |
| 480 | 1 | 4231 | 5181 |
| 481 | 1 | 4232 | 5013 |
| 482 | 1 | 4232 | 5077 |
| 483 | 1 | 4232 | 5080 |
| 484 | 1 | 4232 | 5089 |
| 485 | 1 | 4232 | 5092 |
| 486 | 1 | 4232 | 5180 |
| 487 | 1 | 4233 | 5006 |
| 488 | 1 | 4233 | 5009 |
| 489 | 1 | 4233 | 5014 |
| 490 | 1 | 4233 | 5073 |
| 491 | 1 | 4233 | 5082 |
| 492 | 1 | 4233 | 5085 |
| 493 | 1 | 4234 | 5072 |
| 494 | 1 | 4234 | 5084 |
| 495 | 1 | 4234 | 5087 |
| 496 | 1 | 4234 | 5172 |
| 497 | 1 | 4234 | 5175 |
| 498 | 1 | 4234 | 5187 |
| 499 | 1 | 4235 | 5015 |
| 500 | 1 | 4235 | 5083 |
| 501 | 1 | 4235 | 5086 |
| 502 | 1 | 4235 | 5095 |
| 503 | 1 | 4235 | 5098 |
| 504 | 1 | 4235 | 5186 |
| 505 | 1 | 4236 | 5003 |
| 506 | 1 | 4236 | 5012 |
| 507 | 1 | 4236 | 5016 |
| 508 | 1 | 4236 | 5067 |
| 509 | 1 | 4236 | 5079 |
| 510 | 1 | 4236 | 5088 |
| 511 | 1 | 4237 | 5078 |
| 512 | 1 | 4237 | 5090 |
| 513 | 1 | 4237 | 5093 |
| 514 | 1 | 4237 | 5178 |
| 515 | 1 | 4237 | 5181 |
| 516 | 1 | 4237 | 5193 |
| 517 | 1 | 4238 | 5089 |
| 518 | 1 | 4238 | 5092 |
| 519 | 1 | 4238 | 5101 |
| 520 | 1 | 4238 | 5192 |

|     |   |      |      |
|-----|---|------|------|
| 521 | 1 | 4239 | 5014 |
| 522 | 1 | 4239 | 5085 |
| 523 | 1 | 4239 | 5094 |
| 524 | 1 | 4239 | 5097 |
| 525 | 1 | 4240 | 5084 |
| 526 | 1 | 4240 | 5096 |
| 527 | 1 | 4240 | 5099 |
| 528 | 1 | 4240 | 5184 |
| 529 | 1 | 4240 | 5187 |
| 530 | 1 | 4240 | 5199 |
| 531 | 1 | 4241 | 5095 |
| 532 | 1 | 4241 | 5098 |
| 533 | 1 | 4241 | 5103 |
| 534 | 1 | 4241 | 5198 |
| 535 | 1 | 4242 | 5016 |
| 536 | 1 | 4242 | 5079 |
| 537 | 1 | 4242 | 5091 |
| 538 | 1 | 4242 | 5100 |
| 539 | 1 | 4243 | 5090 |
| 540 | 1 | 4243 | 5190 |
| 541 | 1 | 4243 | 5193 |
| 542 | 1 | 4243 | 5205 |
| 543 | 1 | 4244 | 5096 |
| 544 | 1 | 4244 | 5196 |
| 545 | 1 | 4244 | 5199 |
| 546 | 1 | 4244 | 5211 |
| 547 | 1 | 4245 | 5106 |
| 548 | 1 | 4245 | 5109 |
| 549 | 1 | 4245 | 5218 |
| 550 | 1 | 4245 | 5221 |
| 551 | 1 | 4245 | 5233 |
| 552 | 1 | 4246 | 5017 |
| 553 | 1 | 4246 | 5105 |
| 554 | 1 | 4246 | 5108 |
| 555 | 1 | 4246 | 5117 |
| 556 | 1 | 4246 | 5120 |
| 557 | 1 | 4246 | 5232 |
| 558 | 1 | 4247 | 5022 |
| 559 | 1 | 4247 | 5110 |
| 560 | 1 | 4247 | 5113 |
| 561 | 1 | 4248 | 5112 |
| 562 | 1 | 4248 | 5115 |
| 563 | 1 | 4248 | 5224 |
| 564 | 1 | 4248 | 5227 |
| 565 | 1 | 4248 | 5239 |
| 566 | 1 | 4249 | 5023 |
| 567 | 1 | 4249 | 5111 |
| 568 | 1 | 4249 | 5114 |
| 569 | 1 | 4249 | 5123 |
| 570 | 1 | 4249 | 5126 |
| 571 | 1 | 4249 | 5238 |



|     |   |      |      |
|-----|---|------|------|
| 572 | 1 | 4250 | 5028 |
| 573 | 1 | 4250 | 5107 |
| 574 | 1 | 4250 | 5116 |
| 575 | 1 | 4251 | 5106 |
| 576 | 1 | 4251 | 5118 |
| 577 | 1 | 4251 | 5121 |
| 578 | 1 | 4251 | 5230 |
| 579 | 1 | 4251 | 5233 |
| 580 | 1 | 4251 | 5245 |
| 581 | 1 | 4252 | 5029 |
| 582 | 1 | 4252 | 5117 |
| 583 | 1 | 4252 | 5120 |
| 584 | 1 | 4252 | 5129 |
| 585 | 1 | 4252 | 5132 |
| 586 | 1 | 4252 | 5244 |
| 587 | 1 | 4253 | 5022 |
| 588 | 1 | 4253 | 5025 |
| 589 | 1 | 4253 | 5034 |
| 590 | 1 | 4253 | 5113 |
| 591 | 1 | 4253 | 5122 |
| 592 | 1 | 4253 | 5125 |
| 593 | 1 | 4254 | 5112 |
| 594 | 1 | 4254 | 5124 |
| 595 | 1 | 4254 | 5127 |
| 596 | 1 | 4254 | 5236 |
| 597 | 1 | 4254 | 5239 |
| 598 | 1 | 4254 | 5251 |
| 599 | 1 | 4255 | 5035 |
| 600 | 1 | 4255 | 5123 |
| 601 | 1 | 4255 | 5126 |
| 602 | 1 | 4255 | 5135 |
| 603 | 1 | 4255 | 5138 |
| 604 | 1 | 4255 | 5250 |
| 605 | 1 | 4256 | 5019 |
| 606 | 1 | 4256 | 5028 |
| 607 | 1 | 4256 | 5040 |
| 608 | 1 | 4256 | 5107 |
| 609 | 1 | 4256 | 5119 |
| 610 | 1 | 4256 | 5128 |
| 611 | 1 | 4257 | 5118 |
| 612 | 1 | 4257 | 5130 |
| 613 | 1 | 4257 | 5133 |
| 614 | 1 | 4257 | 5242 |
| 615 | 1 | 4257 | 5245 |
| 616 | 1 | 4257 | 5257 |
| 617 | 1 | 4258 | 5041 |
| 618 | 1 | 4258 | 5129 |
| 619 | 1 | 4258 | 5132 |
| 620 | 1 | 4258 | 5141 |
| 621 | 1 | 4258 | 5144 |
| 622 | 1 | 4258 | 5256 |

|     |   |      |      |
|-----|---|------|------|
| 623 | 1 | 4259 | 5034 |
| 624 | 1 | 4259 | 5037 |
| 625 | 1 | 4259 | 5046 |
| 626 | 1 | 4259 | 5125 |
| 627 | 1 | 4259 | 5134 |
| 628 | 1 | 4259 | 5137 |
| 629 | 1 | 4260 | 5124 |
| 630 | 1 | 4260 | 5136 |
| 631 | 1 | 4260 | 5139 |
| 632 | 1 | 4260 | 5248 |
| 633 | 1 | 4260 | 5251 |
| 634 | 1 | 4260 | 5263 |
| 635 | 1 | 4261 | 5047 |
| 636 | 1 | 4261 | 5135 |
| 637 | 1 | 4261 | 5138 |
| 638 | 1 | 4261 | 5147 |
| 639 | 1 | 4261 | 5150 |
| 640 | 1 | 4261 | 5262 |
| 641 | 1 | 4262 | 5031 |
| 642 | 1 | 4262 | 5040 |
| 643 | 1 | 4262 | 5052 |
| 644 | 1 | 4262 | 5119 |
| 645 | 1 | 4262 | 5131 |
| 646 | 1 | 4262 | 5140 |
| 647 | 1 | 4263 | 5130 |
| 648 | 1 | 4263 | 5142 |
| 649 | 1 | 4263 | 5145 |
| 650 | 1 | 4263 | 5254 |
| 651 | 1 | 4263 | 5257 |
| 652 | 1 | 4263 | 5269 |
| 653 | 1 | 4264 | 5053 |
| 654 | 1 | 4264 | 5141 |
| 655 | 1 | 4264 | 5144 |
| 656 | 1 | 4264 | 5153 |
| 657 | 1 | 4264 | 5156 |
| 658 | 1 | 4264 | 5268 |
| 659 | 1 | 4265 | 5046 |
| 660 | 1 | 4265 | 5049 |
| 661 | 1 | 4265 | 5058 |
| 662 | 1 | 4265 | 5137 |
| 663 | 1 | 4265 | 5146 |
| 664 | 1 | 4265 | 5149 |
| 665 | 1 | 4266 | 5136 |
| 666 | 1 | 4266 | 5148 |
| 667 | 1 | 4266 | 5151 |
| 668 | 1 | 4266 | 5260 |
| 669 | 1 | 4266 | 5263 |
| 670 | 1 | 4266 | 5275 |
| 671 | 1 | 4267 | 5059 |
| 672 | 1 | 4267 | 5147 |
| 673 | 1 | 4267 | 5150 |

|     |   |      |      |
|-----|---|------|------|
| 674 | 1 | 4267 | 5159 |
| 675 | 1 | 4267 | 5162 |
| 676 | 1 | 4267 | 5274 |
| 677 | 1 | 4268 | 5043 |
| 678 | 1 | 4268 | 5052 |
| 679 | 1 | 4268 | 5064 |
| 680 | 1 | 4268 | 5131 |
| 681 | 1 | 4268 | 5143 |
| 682 | 1 | 4268 | 5152 |
| 683 | 1 | 4269 | 5142 |
| 684 | 1 | 4269 | 5154 |
| 685 | 1 | 4269 | 5157 |
| 686 | 1 | 4269 | 5266 |
| 687 | 1 | 4269 | 5269 |
| 688 | 1 | 4269 | 5281 |
| 689 | 1 | 4270 | 5065 |
| 690 | 1 | 4270 | 5153 |
| 691 | 1 | 4270 | 5156 |
| 692 | 1 | 4270 | 5165 |
| 693 | 1 | 4270 | 5168 |
| 694 | 1 | 4270 | 5280 |
| 695 | 1 | 4271 | 5058 |
| 696 | 1 | 4271 | 5061 |
| 697 | 1 | 4271 | 5070 |
| 698 | 1 | 4271 | 5149 |
| 699 | 1 | 4271 | 5158 |
| 700 | 1 | 4271 | 5161 |
| 701 | 1 | 4272 | 5148 |
| 702 | 1 | 4272 | 5160 |
| 703 | 1 | 4272 | 5163 |
| 704 | 1 | 4272 | 5272 |
| 705 | 1 | 4272 | 5275 |
| 706 | 1 | 4272 | 5287 |
| 707 | 1 | 4273 | 5071 |
| 708 | 1 | 4273 | 5159 |
| 709 | 1 | 4273 | 5162 |
| 710 | 1 | 4273 | 5171 |
| 711 | 1 | 4273 | 5174 |
| 712 | 1 | 4273 | 5286 |
| 713 | 1 | 4274 | 5055 |
| 714 | 1 | 4274 | 5064 |
| 715 | 1 | 4274 | 5076 |
| 716 | 1 | 4274 | 5143 |
| 717 | 1 | 4274 | 5155 |
| 718 | 1 | 4274 | 5164 |
| 719 | 1 | 4275 | 5154 |
| 720 | 1 | 4275 | 5166 |
| 721 | 1 | 4275 | 5169 |
| 722 | 1 | 4275 | 5278 |
| 723 | 1 | 4275 | 5281 |
| 724 | 1 | 4275 | 5293 |

|     |   |      |      |
|-----|---|------|------|
| 725 | 1 | 4276 | 5077 |
| 726 | 1 | 4276 | 5165 |
| 727 | 1 | 4276 | 5168 |
| 728 | 1 | 4276 | 5177 |
| 729 | 1 | 4276 | 5180 |
| 730 | 1 | 4276 | 5292 |
| 731 | 1 | 4277 | 5070 |
| 732 | 1 | 4277 | 5073 |
| 733 | 1 | 4277 | 5082 |
| 734 | 1 | 4277 | 5161 |
| 735 | 1 | 4277 | 5170 |
| 736 | 1 | 4277 | 5173 |
| 737 | 1 | 4278 | 5160 |
| 738 | 1 | 4278 | 5172 |
| 739 | 1 | 4278 | 5175 |
| 740 | 1 | 4278 | 5284 |
| 741 | 1 | 4278 | 5287 |
| 742 | 1 | 4278 | 5299 |
| 743 | 1 | 4279 | 5083 |
| 744 | 1 | 4279 | 5171 |
| 745 | 1 | 4279 | 5174 |
| 746 | 1 | 4279 | 5183 |
| 747 | 1 | 4279 | 5186 |
| 748 | 1 | 4279 | 5298 |
| 749 | 1 | 4280 | 5067 |
| 750 | 1 | 4280 | 5076 |
| 751 | 1 | 4280 | 5088 |
| 752 | 1 | 4280 | 5155 |
| 753 | 1 | 4280 | 5167 |
| 754 | 1 | 4280 | 5176 |
| 755 | 1 | 4281 | 5166 |
| 756 | 1 | 4281 | 5178 |
| 757 | 1 | 4281 | 5181 |
| 758 | 1 | 4281 | 5290 |
| 759 | 1 | 4281 | 5293 |
| 760 | 1 | 4281 | 5305 |
| 761 | 1 | 4282 | 5089 |
| 762 | 1 | 4282 | 5177 |
| 763 | 1 | 4282 | 5180 |
| 764 | 1 | 4282 | 5189 |
| 765 | 1 | 4282 | 5192 |
| 766 | 1 | 4282 | 5304 |
| 767 | 1 | 4283 | 5082 |
| 768 | 1 | 4283 | 5085 |
| 769 | 1 | 4283 | 5094 |
| 770 | 1 | 4283 | 5173 |
| 771 | 1 | 4283 | 5182 |
| 772 | 1 | 4283 | 5185 |
| 773 | 1 | 4284 | 5172 |
| 774 | 1 | 4284 | 5184 |
| 775 | 1 | 4284 | 5187 |

|     |   |      |      |
|-----|---|------|------|
| 776 | 1 | 4284 | 5296 |
| 777 | 1 | 4284 | 5299 |
| 778 | 1 | 4284 | 5311 |
| 779 | 1 | 4285 | 5095 |
| 780 | 1 | 4285 | 5183 |
| 781 | 1 | 4285 | 5186 |
| 782 | 1 | 4285 | 5195 |
| 783 | 1 | 4285 | 5198 |
| 784 | 1 | 4285 | 5310 |
| 785 | 1 | 4286 | 5079 |
| 786 | 1 | 4286 | 5088 |
| 787 | 1 | 4286 | 5100 |
| 788 | 1 | 4286 | 5167 |
| 789 | 1 | 4286 | 5179 |
| 790 | 1 | 4286 | 5188 |
| 791 | 1 | 4287 | 5178 |
| 792 | 1 | 4287 | 5190 |
| 793 | 1 | 4287 | 5193 |
| 794 | 1 | 4287 | 5302 |
| 795 | 1 | 4287 | 5305 |
| 796 | 1 | 4287 | 5317 |
| 797 | 1 | 4288 | 5101 |
| 798 | 1 | 4288 | 5189 |
| 799 | 1 | 4288 | 5192 |
| 800 | 1 | 4288 | 5201 |
| 801 | 1 | 4288 | 5204 |
| 802 | 1 | 4288 | 5316 |
| 803 | 1 | 4289 | 5094 |
| 804 | 1 | 4289 | 5097 |
| 805 | 1 | 4289 | 5102 |
| 806 | 1 | 4289 | 5185 |
| 807 | 1 | 4289 | 5194 |
| 808 | 1 | 4289 | 5197 |
| 809 | 1 | 4290 | 5184 |
| 810 | 1 | 4290 | 5196 |
| 811 | 1 | 4290 | 5199 |
| 812 | 1 | 4290 | 5308 |
| 813 | 1 | 4290 | 5311 |
| 814 | 1 | 4290 | 5323 |
| 815 | 1 | 4291 | 5103 |
| 816 | 1 | 4291 | 5195 |
| 817 | 1 | 4291 | 5198 |
| 818 | 1 | 4291 | 5207 |
| 819 | 1 | 4291 | 5210 |
| 820 | 1 | 4291 | 5322 |
| 821 | 1 | 4292 | 5091 |
| 822 | 1 | 4292 | 5100 |
| 823 | 1 | 4292 | 5104 |
| 824 | 1 | 4292 | 5179 |
| 825 | 1 | 4292 | 5191 |
| 826 | 1 | 4292 | 5200 |

|     |   |      |      |
|-----|---|------|------|
| 827 | 1 | 4293 | 5190 |
| 828 | 1 | 4293 | 5202 |
| 829 | 1 | 4293 | 5205 |
| 830 | 1 | 4293 | 5314 |
| 831 | 1 | 4293 | 5317 |
| 832 | 1 | 4293 | 5329 |
| 833 | 1 | 4294 | 5201 |
| 834 | 1 | 4294 | 5204 |
| 835 | 1 | 4294 | 5213 |
| 836 | 1 | 4294 | 5328 |
| 837 | 1 | 4295 | 5102 |
| 838 | 1 | 4295 | 5197 |
| 839 | 1 | 4295 | 5206 |
| 840 | 1 | 4295 | 5209 |
| 841 | 1 | 4296 | 5196 |
| 842 | 1 | 4296 | 5208 |
| 843 | 1 | 4296 | 5211 |
| 844 | 1 | 4296 | 5320 |
| 845 | 1 | 4296 | 5323 |
| 846 | 1 | 4296 | 5335 |
| 847 | 1 | 4297 | 5207 |
| 848 | 1 | 4297 | 5210 |
| 849 | 1 | 4297 | 5215 |
| 850 | 1 | 4297 | 5334 |
| 851 | 1 | 4298 | 5104 |
| 852 | 1 | 4298 | 5191 |
| 853 | 1 | 4298 | 5203 |
| 854 | 1 | 4298 | 5212 |
| 855 | 1 | 4299 | 5202 |
| 856 | 1 | 4299 | 5326 |
| 857 | 1 | 4299 | 5329 |
| 858 | 1 | 4299 | 5341 |
| 859 | 1 | 4300 | 5208 |
| 860 | 1 | 4300 | 5332 |
| 861 | 1 | 4300 | 5335 |
| 862 | 1 | 4300 | 5347 |
| 863 | 1 | 4301 | 5218 |
| 864 | 1 | 4301 | 5221 |
| 865 | 1 | 4301 | 5354 |
| 866 | 1 | 4301 | 5357 |
| 867 | 1 | 4301 | 5369 |
| 868 | 1 | 4302 | 5105 |
| 869 | 1 | 4302 | 5217 |
| 870 | 1 | 4302 | 5220 |
| 871 | 1 | 4302 | 5229 |
| 872 | 1 | 4302 | 5232 |
| 873 | 1 | 4302 | 5368 |
| 874 | 1 | 4303 | 5110 |
| 875 | 1 | 4303 | 5222 |
| 876 | 1 | 4303 | 5225 |
| 877 | 1 | 4304 | 5224 |

|     |   |      |      |
|-----|---|------|------|
| 878 | 1 | 4304 | 5227 |
| 879 | 1 | 4304 | 5360 |
| 880 | 1 | 4304 | 5363 |
| 881 | 1 | 4304 | 5375 |
| 882 | 1 | 4305 | 5111 |
| 883 | 1 | 4305 | 5223 |
| 884 | 1 | 4305 | 5226 |
| 885 | 1 | 4305 | 5235 |
| 886 | 1 | 4305 | 5238 |
| 887 | 1 | 4305 | 5374 |
| 888 | 1 | 4306 | 5116 |
| 889 | 1 | 4306 | 5219 |
| 890 | 1 | 4306 | 5228 |
| 891 | 1 | 4307 | 5218 |
| 892 | 1 | 4307 | 5230 |
| 893 | 1 | 4307 | 5233 |
| 894 | 1 | 4307 | 5366 |
| 895 | 1 | 4307 | 5369 |
| 896 | 1 | 4307 | 5381 |
| 897 | 1 | 4308 | 5117 |
| 898 | 1 | 4308 | 5229 |
| 899 | 1 | 4308 | 5232 |
| 900 | 1 | 4308 | 5241 |
| 901 | 1 | 4308 | 5244 |
| 902 | 1 | 4308 | 5380 |
| 903 | 1 | 4309 | 5110 |
| 904 | 1 | 4309 | 5113 |
| 905 | 1 | 4309 | 5122 |
| 906 | 1 | 4309 | 5225 |
| 907 | 1 | 4309 | 5234 |
| 908 | 1 | 4309 | 5237 |
| 909 | 1 | 4310 | 5224 |
| 910 | 1 | 4310 | 5236 |
| 911 | 1 | 4310 | 5239 |
| 912 | 1 | 4310 | 5372 |
| 913 | 1 | 4310 | 5375 |
| 914 | 1 | 4310 | 5387 |
| 915 | 1 | 4311 | 5123 |
| 916 | 1 | 4311 | 5235 |
| 917 | 1 | 4311 | 5238 |
| 918 | 1 | 4311 | 5247 |
| 919 | 1 | 4311 | 5250 |
| 920 | 1 | 4311 | 5386 |
| 921 | 1 | 4312 | 5107 |
| 922 | 1 | 4312 | 5116 |
| 923 | 1 | 4312 | 5128 |
| 924 | 1 | 4312 | 5219 |
| 925 | 1 | 4312 | 5231 |
| 926 | 1 | 4312 | 5240 |
| 927 | 1 | 4313 | 5230 |
| 928 | 1 | 4313 | 5242 |

|     |   |      |      |
|-----|---|------|------|
| 929 | 1 | 4313 | 5245 |
| 930 | 1 | 4313 | 5378 |
| 931 | 1 | 4313 | 5381 |
| 932 | 1 | 4313 | 5393 |
| 933 | 1 | 4314 | 5129 |
| 934 | 1 | 4314 | 5241 |
| 935 | 1 | 4314 | 5244 |
| 936 | 1 | 4314 | 5253 |
| 937 | 1 | 4314 | 5256 |
| 938 | 1 | 4314 | 5392 |
| 939 | 1 | 4315 | 5122 |
| 940 | 1 | 4315 | 5125 |
| 941 | 1 | 4315 | 5134 |
| 942 | 1 | 4315 | 5237 |
| 943 | 1 | 4315 | 5246 |
| 944 | 1 | 4315 | 5249 |
| 945 | 1 | 4316 | 5236 |
| 946 | 1 | 4316 | 5248 |
| 947 | 1 | 4316 | 5251 |
| 948 | 1 | 4316 | 5384 |
| 949 | 1 | 4316 | 5387 |
| 950 | 1 | 4316 | 5399 |
| 951 | 1 | 4317 | 5135 |
| 952 | 1 | 4317 | 5247 |
| 953 | 1 | 4317 | 5250 |
| 954 | 1 | 4317 | 5259 |
| 955 | 1 | 4317 | 5262 |
| 956 | 1 | 4317 | 5398 |
| 957 | 1 | 4318 | 5119 |
| 958 | 1 | 4318 | 5128 |
| 959 | 1 | 4318 | 5140 |
| 960 | 1 | 4318 | 5231 |
| 961 | 1 | 4318 | 5243 |
| 962 | 1 | 4318 | 5252 |
| 963 | 1 | 4319 | 5242 |
| 964 | 1 | 4319 | 5254 |
| 965 | 1 | 4319 | 5257 |
| 966 | 1 | 4319 | 5390 |
| 967 | 1 | 4319 | 5393 |
| 968 | 1 | 4319 | 5405 |
| 969 | 1 | 4320 | 5141 |
| 970 | 1 | 4320 | 5253 |
| 971 | 1 | 4320 | 5256 |
| 972 | 1 | 4320 | 5265 |
| 973 | 1 | 4320 | 5268 |
| 974 | 1 | 4320 | 5404 |
| 975 | 1 | 4321 | 5134 |
| 976 | 1 | 4321 | 5137 |
| 977 | 1 | 4321 | 5146 |
| 978 | 1 | 4321 | 5249 |
| 979 | 1 | 4321 | 5258 |



|      |   |      |      |
|------|---|------|------|
| 980  | 1 | 4321 | 5261 |
| 981  | 1 | 4322 | 5248 |
| 982  | 1 | 4322 | 5260 |
| 983  | 1 | 4322 | 5263 |
| 984  | 1 | 4322 | 5396 |
| 985  | 1 | 4322 | 5399 |
| 986  | 1 | 4322 | 5411 |
| 987  | 1 | 4323 | 5147 |
| 988  | 1 | 4323 | 5259 |
| 989  | 1 | 4323 | 5262 |
| 990  | 1 | 4323 | 5271 |
| 991  | 1 | 4323 | 5274 |
| 992  | 1 | 4323 | 5410 |
| 993  | 1 | 4324 | 5131 |
| 994  | 1 | 4324 | 5140 |
| 995  | 1 | 4324 | 5152 |
| 996  | 1 | 4324 | 5243 |
| 997  | 1 | 4324 | 5255 |
| 998  | 1 | 4324 | 5264 |
| 999  | 1 | 4325 | 5254 |
| 1000 | 1 | 4325 | 5266 |
| 1001 | 1 | 4325 | 5269 |
| 1002 | 1 | 4325 | 5402 |
| 1003 | 1 | 4325 | 5405 |
| 1004 | 1 | 4325 | 5417 |
| 1005 | 1 | 4326 | 5153 |
| 1006 | 1 | 4326 | 5265 |
| 1007 | 1 | 4326 | 5268 |
| 1008 | 1 | 4326 | 5277 |
| 1009 | 1 | 4326 | 5280 |
| 1010 | 1 | 4326 | 5416 |
| 1011 | 1 | 4327 | 5146 |
| 1012 | 1 | 4327 | 5149 |
| 1013 | 1 | 4327 | 5158 |
| 1014 | 1 | 4327 | 5261 |
| 1015 | 1 | 4327 | 5270 |
| 1016 | 1 | 4327 | 5273 |
| 1017 | 1 | 4328 | 5260 |
| 1018 | 1 | 4328 | 5272 |
| 1019 | 1 | 4328 | 5275 |
| 1020 | 1 | 4328 | 5408 |
| 1021 | 1 | 4328 | 5411 |
| 1022 | 1 | 4328 | 5423 |
| 1023 | 1 | 4329 | 5159 |
| 1024 | 1 | 4329 | 5271 |
| 1025 | 1 | 4329 | 5274 |
| 1026 | 1 | 4329 | 5283 |
| 1027 | 1 | 4329 | 5286 |
| 1028 | 1 | 4329 | 5422 |
| 1029 | 1 | 4330 | 5143 |
| 1030 | 1 | 4330 | 5152 |

|      |   |      |      |
|------|---|------|------|
| 1031 | 1 | 4330 | 5164 |
| 1032 | 1 | 4330 | 5255 |
| 1033 | 1 | 4330 | 5267 |
| 1034 | 1 | 4330 | 5276 |
| 1035 | 1 | 4331 | 5266 |
| 1036 | 1 | 4331 | 5278 |
| 1037 | 1 | 4331 | 5281 |
| 1038 | 1 | 4331 | 5414 |
| 1039 | 1 | 4331 | 5417 |
| 1040 | 1 | 4331 | 5429 |
| 1041 | 1 | 4332 | 5165 |
| 1042 | 1 | 4332 | 5277 |
| 1043 | 1 | 4332 | 5280 |
| 1044 | 1 | 4332 | 5289 |
| 1045 | 1 | 4332 | 5292 |
| 1046 | 1 | 4332 | 5428 |
| 1047 | 1 | 4333 | 5158 |
| 1048 | 1 | 4333 | 5161 |
| 1049 | 1 | 4333 | 5170 |
| 1050 | 1 | 4333 | 5273 |
| 1051 | 1 | 4333 | 5282 |
| 1052 | 1 | 4333 | 5285 |
| 1053 | 1 | 4334 | 5272 |
| 1054 | 1 | 4334 | 5284 |
| 1055 | 1 | 4334 | 5287 |
| 1056 | 1 | 4334 | 5420 |
| 1057 | 1 | 4334 | 5423 |
| 1058 | 1 | 4334 | 5435 |
| 1059 | 1 | 4335 | 5171 |
| 1060 | 1 | 4335 | 5283 |
| 1061 | 1 | 4335 | 5286 |
| 1062 | 1 | 4335 | 5295 |
| 1063 | 1 | 4335 | 5298 |
| 1064 | 1 | 4335 | 5434 |
| 1065 | 1 | 4336 | 5155 |
| 1066 | 1 | 4336 | 5164 |
| 1067 | 1 | 4336 | 5176 |
| 1068 | 1 | 4336 | 5267 |
| 1069 | 1 | 4336 | 5279 |
| 1070 | 1 | 4336 | 5288 |
| 1071 | 1 | 4337 | 5278 |
| 1072 | 1 | 4337 | 5290 |
| 1073 | 1 | 4337 | 5293 |
| 1074 | 1 | 4337 | 5426 |
| 1075 | 1 | 4337 | 5429 |
| 1076 | 1 | 4337 | 5441 |
| 1077 | 1 | 4338 | 5177 |
| 1078 | 1 | 4338 | 5289 |
| 1079 | 1 | 4338 | 5292 |
| 1080 | 1 | 4338 | 5301 |
| 1081 | 1 | 4338 | 5304 |

|      |   |      |      |
|------|---|------|------|
| 1082 | 1 | 4338 | 5440 |
| 1083 | 1 | 4339 | 5170 |
| 1084 | 1 | 4339 | 5173 |
| 1085 | 1 | 4339 | 5182 |
| 1086 | 1 | 4339 | 5285 |
| 1087 | 1 | 4339 | 5294 |
| 1088 | 1 | 4339 | 5297 |
| 1089 | 1 | 4340 | 5284 |
| 1090 | 1 | 4340 | 5296 |
| 1091 | 1 | 4340 | 5299 |
| 1092 | 1 | 4340 | 5432 |
| 1093 | 1 | 4340 | 5435 |
| 1094 | 1 | 4340 | 5447 |
| 1095 | 1 | 4341 | 5183 |
| 1096 | 1 | 4341 | 5295 |
| 1097 | 1 | 4341 | 5298 |
| 1098 | 1 | 4341 | 5307 |
| 1099 | 1 | 4341 | 5310 |
| 1100 | 1 | 4341 | 5446 |
| 1101 | 1 | 4342 | 5167 |
| 1102 | 1 | 4342 | 5176 |
| 1103 | 1 | 4342 | 5188 |
| 1104 | 1 | 4342 | 5279 |
| 1105 | 1 | 4342 | 5291 |
| 1106 | 1 | 4342 | 5300 |
| 1107 | 1 | 4343 | 5290 |
| 1108 | 1 | 4343 | 5302 |
| 1109 | 1 | 4343 | 5305 |
| 1110 | 1 | 4343 | 5438 |
| 1111 | 1 | 4343 | 5441 |
| 1112 | 1 | 4343 | 5453 |
| 1113 | 1 | 4344 | 5189 |
| 1114 | 1 | 4344 | 5301 |
| 1115 | 1 | 4344 | 5304 |
| 1116 | 1 | 4344 | 5313 |
| 1117 | 1 | 4344 | 5316 |
| 1118 | 1 | 4344 | 5452 |
| 1119 | 1 | 4345 | 5182 |
| 1120 | 1 | 4345 | 5185 |
| 1121 | 1 | 4345 | 5194 |
| 1122 | 1 | 4345 | 5297 |
| 1123 | 1 | 4345 | 5306 |
| 1124 | 1 | 4345 | 5309 |
| 1125 | 1 | 4346 | 5296 |
| 1126 | 1 | 4346 | 5308 |
| 1127 | 1 | 4346 | 5311 |
| 1128 | 1 | 4346 | 5444 |
| 1129 | 1 | 4346 | 5447 |
| 1130 | 1 | 4346 | 5459 |
| 1131 | 1 | 4347 | 5195 |
| 1132 | 1 | 4347 | 5307 |

|      |   |      |      |
|------|---|------|------|
| 1133 | 1 | 4347 | 5310 |
| 1134 | 1 | 4347 | 5319 |
| 1135 | 1 | 4347 | 5322 |
| 1136 | 1 | 4347 | 5458 |
| 1137 | 1 | 4348 | 5179 |
| 1138 | 1 | 4348 | 5188 |
| 1139 | 1 | 4348 | 5200 |
| 1140 | 1 | 4348 | 5291 |
| 1141 | 1 | 4348 | 5303 |
| 1142 | 1 | 4348 | 5312 |
| 1143 | 1 | 4349 | 5302 |
| 1144 | 1 | 4349 | 5314 |
| 1145 | 1 | 4349 | 5317 |
| 1146 | 1 | 4349 | 5450 |
| 1147 | 1 | 4349 | 5453 |
| 1148 | 1 | 4349 | 5465 |
| 1149 | 1 | 4350 | 5201 |
| 1150 | 1 | 4350 | 5313 |
| 1151 | 1 | 4350 | 5316 |
| 1152 | 1 | 4350 | 5325 |
| 1153 | 1 | 4350 | 5328 |
| 1154 | 1 | 4350 | 5464 |
| 1155 | 1 | 4351 | 5194 |
| 1156 | 1 | 4351 | 5197 |
| 1157 | 1 | 4351 | 5206 |
| 1158 | 1 | 4351 | 5309 |
| 1159 | 1 | 4351 | 5318 |
| 1160 | 1 | 4351 | 5321 |
| 1161 | 1 | 4352 | 5308 |
| 1162 | 1 | 4352 | 5320 |
| 1163 | 1 | 4352 | 5323 |
| 1164 | 1 | 4352 | 5456 |
| 1165 | 1 | 4352 | 5459 |
| 1166 | 1 | 4352 | 5471 |
| 1167 | 1 | 4353 | 5207 |
| 1168 | 1 | 4353 | 5319 |
| 1169 | 1 | 4353 | 5322 |
| 1170 | 1 | 4353 | 5331 |
| 1171 | 1 | 4353 | 5334 |
| 1172 | 1 | 4353 | 5470 |
| 1173 | 1 | 4354 | 5191 |
| 1174 | 1 | 4354 | 5200 |
| 1175 | 1 | 4354 | 5212 |
| 1176 | 1 | 4354 | 5303 |
| 1177 | 1 | 4354 | 5315 |
| 1178 | 1 | 4354 | 5324 |
| 1179 | 1 | 4355 | 5314 |
| 1180 | 1 | 4355 | 5326 |
| 1181 | 1 | 4355 | 5329 |
| 1182 | 1 | 4355 | 5462 |
| 1183 | 1 | 4355 | 5465 |

|      |   |      |      |
|------|---|------|------|
| 1184 | 1 | 4355 | 5477 |
| 1185 | 1 | 4356 | 5213 |
| 1186 | 1 | 4356 | 5325 |
| 1187 | 1 | 4356 | 5328 |
| 1188 | 1 | 4356 | 5337 |
| 1189 | 1 | 4356 | 5340 |
| 1190 | 1 | 4356 | 5476 |
| 1191 | 1 | 4357 | 5206 |
| 1192 | 1 | 4357 | 5209 |
| 1193 | 1 | 4357 | 5214 |
| 1194 | 1 | 4357 | 5321 |
| 1195 | 1 | 4357 | 5330 |
| 1196 | 1 | 4357 | 5333 |
| 1197 | 1 | 4358 | 5320 |
| 1198 | 1 | 4358 | 5332 |
| 1199 | 1 | 4358 | 5335 |
| 1200 | 1 | 4358 | 5468 |
| 1201 | 1 | 4358 | 5471 |
| 1202 | 1 | 4358 | 5483 |
| 1203 | 1 | 4359 | 5215 |
| 1204 | 1 | 4359 | 5331 |
| 1205 | 1 | 4359 | 5334 |
| 1206 | 1 | 4359 | 5343 |
| 1207 | 1 | 4359 | 5346 |
| 1208 | 1 | 4359 | 5482 |
| 1209 | 1 | 4360 | 5203 |
| 1210 | 1 | 4360 | 5212 |
| 1211 | 1 | 4360 | 5216 |
| 1212 | 1 | 4360 | 5315 |
| 1213 | 1 | 4360 | 5327 |
| 1214 | 1 | 4360 | 5336 |
| 1215 | 1 | 4361 | 5326 |
| 1216 | 1 | 4361 | 5338 |
| 1217 | 1 | 4361 | 5341 |
| 1218 | 1 | 4361 | 5474 |
| 1219 | 1 | 4361 | 5477 |
| 1220 | 1 | 4361 | 5489 |
| 1221 | 1 | 4362 | 5337 |
| 1222 | 1 | 4362 | 5340 |
| 1223 | 1 | 4362 | 5349 |
| 1224 | 1 | 4362 | 5488 |
| 1225 | 1 | 4363 | 5214 |
| 1226 | 1 | 4363 | 5333 |
| 1227 | 1 | 4363 | 5342 |
| 1228 | 1 | 4363 | 5345 |
| 1229 | 1 | 4364 | 5332 |
| 1230 | 1 | 4364 | 5344 |
| 1231 | 1 | 4364 | 5347 |
| 1232 | 1 | 4364 | 5480 |
| 1233 | 1 | 4364 | 5483 |
| 1234 | 1 | 4364 | 5495 |

|      |   |      |      |
|------|---|------|------|
| 1235 | 1 | 4365 | 5343 |
| 1236 | 1 | 4365 | 5346 |
| 1237 | 1 | 4365 | 5351 |
| 1238 | 1 | 4365 | 5494 |
| 1239 | 1 | 4366 | 5216 |
| 1240 | 1 | 4366 | 5327 |
| 1241 | 1 | 4366 | 5339 |
| 1242 | 1 | 4366 | 5348 |
| 1243 | 1 | 4367 | 5338 |
| 1244 | 1 | 4367 | 5486 |
| 1245 | 1 | 4367 | 5489 |
| 1246 | 1 | 4368 | 5344 |
| 1247 | 1 | 4368 | 5492 |
| 1248 | 1 | 4368 | 5495 |
| 1249 | 1 | 4369 | 5354 |
| 1250 | 1 | 4369 | 5357 |
| 1251 | 1 | 4369 | 5498 |
| 1252 | 1 | 4369 | 5501 |
| 1253 | 1 | 4369 | 5513 |
| 1254 | 1 | 4370 | 5217 |
| 1255 | 1 | 4370 | 5353 |
| 1256 | 1 | 4370 | 5356 |
| 1257 | 1 | 4370 | 5365 |
| 1258 | 1 | 4370 | 5368 |
| 1259 | 1 | 4370 | 5512 |
| 1260 | 1 | 4371 | 5222 |
| 1261 | 1 | 4371 | 5358 |
| 1262 | 1 | 4371 | 5361 |
| 1263 | 1 | 4372 | 5360 |
| 1264 | 1 | 4372 | 5363 |
| 1265 | 1 | 4372 | 5504 |
| 1266 | 1 | 4372 | 5507 |
| 1267 | 1 | 4372 | 5519 |
| 1268 | 1 | 4373 | 5223 |
| 1269 | 1 | 4373 | 5359 |
| 1270 | 1 | 4373 | 5362 |
| 1271 | 1 | 4373 | 5371 |
| 1272 | 1 | 4373 | 5374 |
| 1273 | 1 | 4373 | 5518 |
| 1274 | 1 | 4374 | 5228 |
| 1275 | 1 | 4374 | 5355 |
| 1276 | 1 | 4374 | 5364 |
| 1277 | 1 | 4375 | 5354 |
| 1278 | 1 | 4375 | 5366 |
| 1279 | 1 | 4375 | 5369 |
| 1280 | 1 | 4375 | 5510 |
| 1281 | 1 | 4375 | 5513 |
| 1282 | 1 | 4375 | 5525 |
| 1283 | 1 | 4376 | 5229 |
| 1284 | 1 | 4376 | 5365 |
| 1285 | 1 | 4376 | 5368 |

|      |   |      |      |
|------|---|------|------|
| 1286 | 1 | 4376 | 5377 |
| 1287 | 1 | 4376 | 5380 |
| 1288 | 1 | 4376 | 5524 |
| 1289 | 1 | 4377 | 5222 |
| 1290 | 1 | 4377 | 5225 |
| 1291 | 1 | 4377 | 5234 |
| 1292 | 1 | 4377 | 5361 |
| 1293 | 1 | 4377 | 5370 |
| 1294 | 1 | 4377 | 5373 |
| 1295 | 1 | 4378 | 5360 |
| 1296 | 1 | 4378 | 5372 |
| 1297 | 1 | 4378 | 5375 |
| 1298 | 1 | 4378 | 5516 |
| 1299 | 1 | 4378 | 5519 |
| 1300 | 1 | 4378 | 5531 |
| 1301 | 1 | 4379 | 5235 |
| 1302 | 1 | 4379 | 5371 |
| 1303 | 1 | 4379 | 5374 |
| 1304 | 1 | 4379 | 5383 |
| 1305 | 1 | 4379 | 5386 |
| 1306 | 1 | 4379 | 5530 |
| 1307 | 1 | 4380 | 5219 |
| 1308 | 1 | 4380 | 5228 |
| 1309 | 1 | 4380 | 5240 |
| 1310 | 1 | 4380 | 5355 |
| 1311 | 1 | 4380 | 5367 |
| 1312 | 1 | 4380 | 5376 |
| 1313 | 1 | 4381 | 5366 |
| 1314 | 1 | 4381 | 5378 |
| 1315 | 1 | 4381 | 5381 |
| 1316 | 1 | 4381 | 5522 |
| 1317 | 1 | 4381 | 5525 |
| 1318 | 1 | 4381 | 5537 |
| 1319 | 1 | 4382 | 5241 |
| 1320 | 1 | 4382 | 5377 |
| 1321 | 1 | 4382 | 5380 |
| 1322 | 1 | 4382 | 5389 |
| 1323 | 1 | 4382 | 5392 |
| 1324 | 1 | 4382 | 5536 |
| 1325 | 1 | 4383 | 5234 |
| 1326 | 1 | 4383 | 5237 |
| 1327 | 1 | 4383 | 5246 |
| 1328 | 1 | 4383 | 5373 |
| 1329 | 1 | 4383 | 5382 |
| 1330 | 1 | 4383 | 5385 |
| 1331 | 1 | 4384 | 5372 |
| 1332 | 1 | 4384 | 5384 |
| 1333 | 1 | 4384 | 5387 |
| 1334 | 1 | 4384 | 5528 |
| 1335 | 1 | 4384 | 5531 |
| 1336 | 1 | 4384 | 5543 |

|      |   |      |      |
|------|---|------|------|
| 1337 | 1 | 4385 | 5247 |
| 1338 | 1 | 4385 | 5383 |
| 1339 | 1 | 4385 | 5386 |
| 1340 | 1 | 4385 | 5395 |
| 1341 | 1 | 4385 | 5398 |
| 1342 | 1 | 4385 | 5542 |
| 1343 | 1 | 4386 | 5231 |
| 1344 | 1 | 4386 | 5240 |
| 1345 | 1 | 4386 | 5252 |
| 1346 | 1 | 4386 | 5367 |
| 1347 | 1 | 4386 | 5379 |
| 1348 | 1 | 4386 | 5388 |
| 1349 | 1 | 4387 | 5378 |
| 1350 | 1 | 4387 | 5390 |
| 1351 | 1 | 4387 | 5393 |
| 1352 | 1 | 4387 | 5534 |
| 1353 | 1 | 4387 | 5537 |
| 1354 | 1 | 4387 | 5549 |
| 1355 | 1 | 4388 | 5253 |
| 1356 | 1 | 4388 | 5389 |
| 1357 | 1 | 4388 | 5392 |
| 1358 | 1 | 4388 | 5401 |
| 1359 | 1 | 4388 | 5404 |
| 1360 | 1 | 4388 | 5548 |
| 1361 | 1 | 4389 | 5246 |
| 1362 | 1 | 4389 | 5249 |
| 1363 | 1 | 4389 | 5258 |
| 1364 | 1 | 4389 | 5385 |
| 1365 | 1 | 4389 | 5394 |
| 1366 | 1 | 4389 | 5397 |
| 1367 | 1 | 4390 | 5384 |
| 1368 | 1 | 4390 | 5396 |
| 1369 | 1 | 4390 | 5399 |
| 1370 | 1 | 4390 | 5540 |
| 1371 | 1 | 4390 | 5543 |
| 1372 | 1 | 4390 | 5555 |
| 1373 | 1 | 4391 | 5259 |
| 1374 | 1 | 4391 | 5395 |
| 1375 | 1 | 4391 | 5398 |
| 1376 | 1 | 4391 | 5407 |
| 1377 | 1 | 4391 | 5410 |
| 1378 | 1 | 4391 | 5554 |
| 1379 | 1 | 4392 | 5243 |
| 1380 | 1 | 4392 | 5252 |
| 1381 | 1 | 4392 | 5264 |
| 1382 | 1 | 4392 | 5379 |
| 1383 | 1 | 4392 | 5391 |
| 1384 | 1 | 4392 | 5400 |
| 1385 | 1 | 4393 | 5390 |
| 1386 | 1 | 4393 | 5402 |
| 1387 | 1 | 4393 | 5405 |



|      |   |      |      |
|------|---|------|------|
| 1388 | 1 | 4393 | 5546 |
| 1389 | 1 | 4393 | 5549 |
| 1390 | 1 | 4393 | 5561 |
| 1391 | 1 | 4394 | 5265 |
| 1392 | 1 | 4394 | 5401 |
| 1393 | 1 | 4394 | 5404 |
| 1394 | 1 | 4394 | 5413 |
| 1395 | 1 | 4394 | 5416 |
| 1396 | 1 | 4394 | 5560 |
| 1397 | 1 | 4395 | 5258 |
| 1398 | 1 | 4395 | 5261 |
| 1399 | 1 | 4395 | 5270 |
| 1400 | 1 | 4395 | 5397 |
| 1401 | 1 | 4395 | 5406 |
| 1402 | 1 | 4395 | 5409 |
| 1403 | 1 | 4396 | 5396 |
| 1404 | 1 | 4396 | 5408 |
| 1405 | 1 | 4396 | 5411 |
| 1406 | 1 | 4396 | 5552 |
| 1407 | 1 | 4396 | 5555 |
| 1408 | 1 | 4396 | 5567 |
| 1409 | 1 | 4397 | 5271 |
| 1410 | 1 | 4397 | 5407 |
| 1411 | 1 | 4397 | 5410 |
| 1412 | 1 | 4397 | 5419 |
| 1413 | 1 | 4397 | 5422 |
| 1414 | 1 | 4397 | 5566 |
| 1415 | 1 | 4398 | 5255 |
| 1416 | 1 | 4398 | 5264 |
| 1417 | 1 | 4398 | 5276 |
| 1418 | 1 | 4398 | 5391 |
| 1419 | 1 | 4398 | 5403 |
| 1420 | 1 | 4398 | 5412 |
| 1421 | 1 | 4399 | 5402 |
| 1422 | 1 | 4399 | 5414 |
| 1423 | 1 | 4399 | 5417 |
| 1424 | 1 | 4399 | 5558 |
| 1425 | 1 | 4399 | 5561 |
| 1426 | 1 | 4399 | 5573 |
| 1427 | 1 | 4400 | 5277 |
| 1428 | 1 | 4400 | 5413 |
| 1429 | 1 | 4400 | 5416 |
| 1430 | 1 | 4400 | 5425 |
| 1431 | 1 | 4400 | 5428 |
| 1432 | 1 | 4400 | 5572 |
| 1433 | 1 | 4401 | 5270 |
| 1434 | 1 | 4401 | 5273 |
| 1435 | 1 | 4401 | 5282 |
| 1436 | 1 | 4401 | 5409 |
| 1437 | 1 | 4401 | 5418 |
| 1438 | 1 | 4401 | 5421 |

|      |   |      |      |
|------|---|------|------|
| 1439 | 1 | 4402 | 5408 |
| 1440 | 1 | 4402 | 5420 |
| 1441 | 1 | 4402 | 5423 |
| 1442 | 1 | 4402 | 5564 |
| 1443 | 1 | 4402 | 5567 |
| 1444 | 1 | 4402 | 5579 |
| 1445 | 1 | 4403 | 5283 |
| 1446 | 1 | 4403 | 5419 |
| 1447 | 1 | 4403 | 5422 |
| 1448 | 1 | 4403 | 5431 |
| 1449 | 1 | 4403 | 5434 |
| 1450 | 1 | 4403 | 5578 |
| 1451 | 1 | 4404 | 5267 |
| 1452 | 1 | 4404 | 5276 |
| 1453 | 1 | 4404 | 5288 |
| 1454 | 1 | 4404 | 5403 |
| 1455 | 1 | 4404 | 5415 |
| 1456 | 1 | 4404 | 5424 |
| 1457 | 1 | 4405 | 5414 |
| 1458 | 1 | 4405 | 5426 |
| 1459 | 1 | 4405 | 5429 |
| 1460 | 1 | 4405 | 5570 |
| 1461 | 1 | 4405 | 5573 |
| 1462 | 1 | 4405 | 5585 |
| 1463 | 1 | 4406 | 5289 |
| 1464 | 1 | 4406 | 5425 |
| 1465 | 1 | 4406 | 5428 |
| 1466 | 1 | 4406 | 5437 |
| 1467 | 1 | 4406 | 5440 |
| 1468 | 1 | 4406 | 5584 |
| 1469 | 1 | 4407 | 5282 |
| 1470 | 1 | 4407 | 5285 |
| 1471 | 1 | 4407 | 5294 |
| 1472 | 1 | 4407 | 5421 |
| 1473 | 1 | 4407 | 5430 |
| 1474 | 1 | 4407 | 5433 |
| 1475 | 1 | 4408 | 5420 |
| 1476 | 1 | 4408 | 5432 |
| 1477 | 1 | 4408 | 5435 |
| 1478 | 1 | 4408 | 5576 |
| 1479 | 1 | 4408 | 5579 |
| 1480 | 1 | 4408 | 5591 |
| 1481 | 1 | 4409 | 5295 |
| 1482 | 1 | 4409 | 5431 |
| 1483 | 1 | 4409 | 5434 |
| 1484 | 1 | 4409 | 5443 |
| 1485 | 1 | 4409 | 5446 |
| 1486 | 1 | 4409 | 5590 |
| 1487 | 1 | 4410 | 5279 |
| 1488 | 1 | 4410 | 5288 |
| 1489 | 1 | 4410 | 5300 |

|      |   |      |      |
|------|---|------|------|
| 1490 | 1 | 4410 | 5415 |
| 1491 | 1 | 4410 | 5427 |
| 1492 | 1 | 4410 | 5436 |
| 1493 | 1 | 4411 | 5426 |
| 1494 | 1 | 4411 | 5438 |
| 1495 | 1 | 4411 | 5441 |
| 1496 | 1 | 4411 | 5582 |
| 1497 | 1 | 4411 | 5585 |
| 1498 | 1 | 4411 | 5597 |
| 1499 | 1 | 4412 | 5301 |
| 1500 | 1 | 4412 | 5437 |
| 1501 | 1 | 4412 | 5440 |
| 1502 | 1 | 4412 | 5449 |
| 1503 | 1 | 4412 | 5452 |
| 1504 | 1 | 4412 | 5596 |
| 1505 | 1 | 4413 | 5294 |
| 1506 | 1 | 4413 | 5297 |
| 1507 | 1 | 4413 | 5306 |
| 1508 | 1 | 4413 | 5433 |
| 1509 | 1 | 4413 | 5442 |
| 1510 | 1 | 4413 | 5445 |
| 1511 | 1 | 4414 | 5432 |
| 1512 | 1 | 4414 | 5444 |
| 1513 | 1 | 4414 | 5447 |
| 1514 | 1 | 4414 | 5588 |
| 1515 | 1 | 4414 | 5591 |
| 1516 | 1 | 4414 | 5603 |
| 1517 | 1 | 4415 | 5307 |
| 1518 | 1 | 4415 | 5443 |
| 1519 | 1 | 4415 | 5446 |
| 1520 | 1 | 4415 | 5455 |
| 1521 | 1 | 4415 | 5458 |
| 1522 | 1 | 4415 | 5602 |
| 1523 | 1 | 4416 | 5291 |
| 1524 | 1 | 4416 | 5300 |
| 1525 | 1 | 4416 | 5312 |
| 1526 | 1 | 4416 | 5427 |
| 1527 | 1 | 4416 | 5439 |
| 1528 | 1 | 4416 | 5448 |
| 1529 | 1 | 4417 | 5438 |
| 1530 | 1 | 4417 | 5450 |
| 1531 | 1 | 4417 | 5453 |
| 1532 | 1 | 4417 | 5594 |
| 1533 | 1 | 4417 | 5597 |
| 1534 | 1 | 4417 | 5609 |
| 1535 | 1 | 4418 | 5313 |
| 1536 | 1 | 4418 | 5449 |
| 1537 | 1 | 4418 | 5452 |
| 1538 | 1 | 4418 | 5461 |
| 1539 | 1 | 4418 | 5464 |
| 1540 | 1 | 4418 | 5608 |

|      |   |      |      |
|------|---|------|------|
| 1541 | 1 | 4419 | 5306 |
| 1542 | 1 | 4419 | 5309 |
| 1543 | 1 | 4419 | 5318 |
| 1544 | 1 | 4419 | 5445 |
| 1545 | 1 | 4419 | 5454 |
| 1546 | 1 | 4419 | 5457 |
| 1547 | 1 | 4420 | 5444 |
| 1548 | 1 | 4420 | 5456 |
| 1549 | 1 | 4420 | 5459 |
| 1550 | 1 | 4420 | 5600 |
| 1551 | 1 | 4420 | 5603 |
| 1552 | 1 | 4420 | 5615 |
| 1553 | 1 | 4421 | 5319 |
| 1554 | 1 | 4421 | 5455 |
| 1555 | 1 | 4421 | 5458 |
| 1556 | 1 | 4421 | 5467 |
| 1557 | 1 | 4421 | 5470 |
| 1558 | 1 | 4421 | 5614 |
| 1559 | 1 | 4422 | 5303 |
| 1560 | 1 | 4422 | 5312 |
| 1561 | 1 | 4422 | 5324 |
| 1562 | 1 | 4422 | 5439 |
| 1563 | 1 | 4422 | 5451 |
| 1564 | 1 | 4422 | 5460 |
| 1565 | 1 | 4423 | 5450 |
| 1566 | 1 | 4423 | 5462 |
| 1567 | 1 | 4423 | 5465 |
| 1568 | 1 | 4423 | 5606 |
| 1569 | 1 | 4423 | 5609 |
| 1570 | 1 | 4423 | 5621 |
| 1571 | 1 | 4424 | 5325 |
| 1572 | 1 | 4424 | 5461 |
| 1573 | 1 | 4424 | 5464 |
| 1574 | 1 | 4424 | 5473 |
| 1575 | 1 | 4424 | 5476 |
| 1576 | 1 | 4424 | 5620 |
| 1577 | 1 | 4425 | 5318 |
| 1578 | 1 | 4425 | 5321 |
| 1579 | 1 | 4425 | 5330 |
| 1580 | 1 | 4425 | 5457 |
| 1581 | 1 | 4425 | 5466 |
| 1582 | 1 | 4425 | 5469 |
| 1583 | 1 | 4426 | 5456 |
| 1584 | 1 | 4426 | 5468 |
| 1585 | 1 | 4426 | 5471 |
| 1586 | 1 | 4426 | 5612 |
| 1587 | 1 | 4426 | 5615 |
| 1588 | 1 | 4426 | 5627 |
| 1589 | 1 | 4427 | 5331 |
| 1590 | 1 | 4427 | 5467 |
| 1591 | 1 | 4427 | 5470 |

|      |   |      |      |
|------|---|------|------|
| 1592 | 1 | 4427 | 5479 |
| 1593 | 1 | 4427 | 5482 |
| 1594 | 1 | 4427 | 5626 |
| 1595 | 1 | 4428 | 5315 |
| 1596 | 1 | 4428 | 5324 |
| 1597 | 1 | 4428 | 5336 |
| 1598 | 1 | 4428 | 5451 |
| 1599 | 1 | 4428 | 5463 |
| 1600 | 1 | 4428 | 5472 |
| 1601 | 1 | 4429 | 5462 |
| 1602 | 1 | 4429 | 5474 |
| 1603 | 1 | 4429 | 5477 |
| 1604 | 1 | 4429 | 5618 |
| 1605 | 1 | 4429 | 5621 |
| 1606 | 1 | 4429 | 5633 |
| 1607 | 1 | 4430 | 5337 |
| 1608 | 1 | 4430 | 5473 |
| 1609 | 1 | 4430 | 5476 |
| 1610 | 1 | 4430 | 5485 |
| 1611 | 1 | 4430 | 5488 |
| 1612 | 1 | 4430 | 5632 |
| 1613 | 1 | 4431 | 5330 |
| 1614 | 1 | 4431 | 5333 |
| 1615 | 1 | 4431 | 5342 |
| 1616 | 1 | 4431 | 5469 |
| 1617 | 1 | 4431 | 5478 |
| 1618 | 1 | 4431 | 5481 |
| 1619 | 1 | 4432 | 5468 |
| 1620 | 1 | 4432 | 5480 |
| 1621 | 1 | 4432 | 5483 |
| 1622 | 1 | 4432 | 5624 |
| 1623 | 1 | 4432 | 5627 |
| 1624 | 1 | 4432 | 5639 |
| 1625 | 1 | 4433 | 5343 |
| 1626 | 1 | 4433 | 5479 |
| 1627 | 1 | 4433 | 5482 |
| 1628 | 1 | 4433 | 5491 |
| 1629 | 1 | 4433 | 5494 |
| 1630 | 1 | 4433 | 5638 |
| 1631 | 1 | 4434 | 5327 |
| 1632 | 1 | 4434 | 5336 |
| 1633 | 1 | 4434 | 5348 |
| 1634 | 1 | 4434 | 5463 |
| 1635 | 1 | 4434 | 5475 |
| 1636 | 1 | 4434 | 5484 |
| 1637 | 1 | 4435 | 5474 |
| 1638 | 1 | 4435 | 5486 |
| 1639 | 1 | 4435 | 5489 |
| 1640 | 1 | 4435 | 5630 |
| 1641 | 1 | 4435 | 5633 |
| 1642 | 1 | 4436 | 5349 |

|      |   |      |      |
|------|---|------|------|
| 1643 | 1 | 4436 | 5485 |
| 1644 | 1 | 4436 | 5488 |
| 1645 | 1 | 4437 | 5342 |
| 1646 | 1 | 4437 | 5345 |
| 1647 | 1 | 4437 | 5350 |
| 1648 | 1 | 4437 | 5481 |
| 1649 | 1 | 4437 | 5490 |
| 1650 | 1 | 4437 | 5493 |
| 1651 | 1 | 4438 | 5480 |
| 1652 | 1 | 4438 | 5492 |
| 1653 | 1 | 4438 | 5495 |
| 1654 | 1 | 4438 | 5636 |
| 1655 | 1 | 4438 | 5639 |
| 1656 | 1 | 4439 | 5351 |
| 1657 | 1 | 4439 | 5491 |
| 1658 | 1 | 4439 | 5494 |
| 1659 | 1 | 4440 | 5339 |
| 1660 | 1 | 4440 | 5348 |
| 1661 | 1 | 4440 | 5352 |
| 1662 | 1 | 4440 | 5475 |
| 1663 | 1 | 4440 | 5487 |
| 1664 | 1 | 4440 | 5496 |
| 1665 | 1 | 4441 | 5498 |
| 1666 | 1 | 4441 | 5501 |
| 1667 | 1 | 4441 | 5642 |
| 1668 | 1 | 4441 | 5645 |
| 1669 | 1 | 4441 | 5657 |
| 1670 | 1 | 4442 | 5353 |
| 1671 | 1 | 4442 | 5497 |
| 1672 | 1 | 4442 | 5500 |
| 1673 | 1 | 4442 | 5509 |
| 1674 | 1 | 4442 | 5512 |
| 1675 | 1 | 4442 | 5656 |
| 1676 | 1 | 4443 | 5358 |
| 1677 | 1 | 4443 | 5502 |
| 1678 | 1 | 4443 | 5505 |
| 1679 | 1 | 4444 | 5504 |
| 1680 | 1 | 4444 | 5507 |
| 1681 | 1 | 4444 | 5648 |
| 1682 | 1 | 4444 | 5651 |
| 1683 | 1 | 4444 | 5663 |
| 1684 | 1 | 4445 | 5359 |
| 1685 | 1 | 4445 | 5503 |
| 1686 | 1 | 4445 | 5506 |
| 1687 | 1 | 4445 | 5515 |
| 1688 | 1 | 4445 | 5518 |
| 1689 | 1 | 4445 | 5662 |
| 1690 | 1 | 4446 | 5364 |
| 1691 | 1 | 4446 | 5499 |
| 1692 | 1 | 4446 | 5508 |
| 1693 | 1 | 4447 | 5498 |

|      |   |      |      |
|------|---|------|------|
| 1694 | 1 | 4447 | 5510 |
| 1695 | 1 | 4447 | 5513 |
| 1696 | 1 | 4447 | 5654 |
| 1697 | 1 | 4447 | 5657 |
| 1698 | 1 | 4447 | 5669 |
| 1699 | 1 | 4448 | 5365 |
| 1700 | 1 | 4448 | 5509 |
| 1701 | 1 | 4448 | 5512 |
| 1702 | 1 | 4448 | 5521 |
| 1703 | 1 | 4448 | 5524 |
| 1704 | 1 | 4448 | 5668 |
| 1705 | 1 | 4449 | 5358 |
| 1706 | 1 | 4449 | 5361 |
| 1707 | 1 | 4449 | 5370 |
| 1708 | 1 | 4449 | 5505 |
| 1709 | 1 | 4449 | 5514 |
| 1710 | 1 | 4449 | 5517 |
| 1711 | 1 | 4450 | 5504 |
| 1712 | 1 | 4450 | 5516 |
| 1713 | 1 | 4450 | 5519 |
| 1714 | 1 | 4450 | 5660 |
| 1715 | 1 | 4450 | 5663 |
| 1716 | 1 | 4450 | 5675 |
| 1717 | 1 | 4451 | 5371 |
| 1718 | 1 | 4451 | 5515 |
| 1719 | 1 | 4451 | 5518 |
| 1720 | 1 | 4451 | 5527 |
| 1721 | 1 | 4451 | 5530 |
| 1722 | 1 | 4451 | 5674 |
| 1723 | 1 | 4452 | 5355 |
| 1724 | 1 | 4452 | 5364 |
| 1725 | 1 | 4452 | 5376 |
| 1726 | 1 | 4452 | 5499 |
| 1727 | 1 | 4452 | 5511 |
| 1728 | 1 | 4452 | 5520 |
| 1729 | 1 | 4453 | 5510 |
| 1730 | 1 | 4453 | 5522 |
| 1731 | 1 | 4453 | 5525 |
| 1732 | 1 | 4453 | 5666 |
| 1733 | 1 | 4453 | 5669 |
| 1734 | 1 | 4453 | 5681 |
| 1735 | 1 | 4454 | 5377 |
| 1736 | 1 | 4454 | 5521 |
| 1737 | 1 | 4454 | 5524 |
| 1738 | 1 | 4454 | 5533 |
| 1739 | 1 | 4454 | 5536 |
| 1740 | 1 | 4454 | 5680 |
| 1741 | 1 | 4455 | 5370 |
| 1742 | 1 | 4455 | 5373 |
| 1743 | 1 | 4455 | 5382 |
| 1744 | 1 | 4455 | 5517 |

|      |   |      |      |
|------|---|------|------|
| 1745 | 1 | 4455 | 5526 |
| 1746 | 1 | 4455 | 5529 |
| 1747 | 1 | 4456 | 5516 |
| 1748 | 1 | 4456 | 5528 |
| 1749 | 1 | 4456 | 5531 |
| 1750 | 1 | 4456 | 5672 |
| 1751 | 1 | 4456 | 5675 |
| 1752 | 1 | 4456 | 5687 |
| 1753 | 1 | 4457 | 5383 |
| 1754 | 1 | 4457 | 5527 |
| 1755 | 1 | 4457 | 5530 |
| 1756 | 1 | 4457 | 5539 |
| 1757 | 1 | 4457 | 5542 |
| 1758 | 1 | 4457 | 5686 |
| 1759 | 1 | 4458 | 5367 |
| 1760 | 1 | 4458 | 5376 |
| 1761 | 1 | 4458 | 5388 |
| 1762 | 1 | 4458 | 5511 |
| 1763 | 1 | 4458 | 5523 |
| 1764 | 1 | 4458 | 5532 |
| 1765 | 1 | 4459 | 5522 |
| 1766 | 1 | 4459 | 5534 |
| 1767 | 1 | 4459 | 5537 |
| 1768 | 1 | 4459 | 5678 |
| 1769 | 1 | 4459 | 5681 |
| 1770 | 1 | 4459 | 5693 |
| 1771 | 1 | 4460 | 5389 |
| 1772 | 1 | 4460 | 5533 |
| 1773 | 1 | 4460 | 5536 |
| 1774 | 1 | 4460 | 5545 |
| 1775 | 1 | 4460 | 5548 |
| 1776 | 1 | 4460 | 5692 |
| 1777 | 1 | 4461 | 5382 |
| 1778 | 1 | 4461 | 5385 |
| 1779 | 1 | 4461 | 5394 |
| 1780 | 1 | 4461 | 5529 |
| 1781 | 1 | 4461 | 5538 |
| 1782 | 1 | 4461 | 5541 |
| 1783 | 1 | 4462 | 5528 |
| 1784 | 1 | 4462 | 5540 |
| 1785 | 1 | 4462 | 5543 |
| 1786 | 1 | 4462 | 5684 |
| 1787 | 1 | 4462 | 5687 |
| 1788 | 1 | 4462 | 5699 |
| 1789 | 1 | 4463 | 5395 |
| 1790 | 1 | 4463 | 5539 |
| 1791 | 1 | 4463 | 5542 |
| 1792 | 1 | 4463 | 5551 |
| 1793 | 1 | 4463 | 5554 |
| 1794 | 1 | 4463 | 5698 |
| 1795 | 1 | 4464 | 5379 |



|      |   |      |      |
|------|---|------|------|
| 1796 | 1 | 4464 | 5388 |
| 1797 | 1 | 4464 | 5400 |
| 1798 | 1 | 4464 | 5523 |
| 1799 | 1 | 4464 | 5535 |
| 1800 | 1 | 4464 | 5544 |
| 1801 | 1 | 4465 | 5534 |
| 1802 | 1 | 4465 | 5546 |
| 1803 | 1 | 4465 | 5549 |
| 1804 | 1 | 4465 | 5690 |
| 1805 | 1 | 4465 | 5693 |
| 1806 | 1 | 4465 | 5705 |
| 1807 | 1 | 4466 | 5401 |
| 1808 | 1 | 4466 | 5545 |
| 1809 | 1 | 4466 | 5548 |
| 1810 | 1 | 4466 | 5557 |
| 1811 | 1 | 4466 | 5560 |
| 1812 | 1 | 4466 | 5704 |
| 1813 | 1 | 4467 | 5394 |
| 1814 | 1 | 4467 | 5397 |
| 1815 | 1 | 4467 | 5406 |
| 1816 | 1 | 4467 | 5541 |
| 1817 | 1 | 4467 | 5550 |
| 1818 | 1 | 4467 | 5553 |
| 1819 | 1 | 4468 | 5540 |
| 1820 | 1 | 4468 | 5552 |
| 1821 | 1 | 4468 | 5555 |
| 1822 | 1 | 4468 | 5696 |
| 1823 | 1 | 4468 | 5699 |
| 1824 | 1 | 4468 | 5711 |
| 1825 | 1 | 4469 | 5407 |
| 1826 | 1 | 4469 | 5551 |
| 1827 | 1 | 4469 | 5554 |
| 1828 | 1 | 4469 | 5563 |
| 1829 | 1 | 4469 | 5566 |
| 1830 | 1 | 4469 | 5710 |
| 1831 | 1 | 4470 | 5391 |
| 1832 | 1 | 4470 | 5400 |
| 1833 | 1 | 4470 | 5412 |
| 1834 | 1 | 4470 | 5535 |
| 1835 | 1 | 4470 | 5547 |
| 1836 | 1 | 4470 | 5556 |
| 1837 | 1 | 4471 | 5546 |
| 1838 | 1 | 4471 | 5558 |
| 1839 | 1 | 4471 | 5561 |
| 1840 | 1 | 4471 | 5702 |
| 1841 | 1 | 4471 | 5705 |
| 1842 | 1 | 4471 | 5717 |
| 1843 | 1 | 4472 | 5413 |
| 1844 | 1 | 4472 | 5557 |
| 1845 | 1 | 4472 | 5560 |
| 1846 | 1 | 4472 | 5569 |

|      |   |      |      |
|------|---|------|------|
| 1847 | 1 | 4472 | 5572 |
| 1848 | 1 | 4472 | 5716 |
| 1849 | 1 | 4473 | 5406 |
| 1850 | 1 | 4473 | 5409 |
| 1851 | 1 | 4473 | 5418 |
| 1852 | 1 | 4473 | 5553 |
| 1853 | 1 | 4473 | 5562 |
| 1854 | 1 | 4473 | 5565 |
| 1855 | 1 | 4474 | 5552 |
| 1856 | 1 | 4474 | 5564 |
| 1857 | 1 | 4474 | 5567 |
| 1858 | 1 | 4474 | 5708 |
| 1859 | 1 | 4474 | 5711 |
| 1860 | 1 | 4474 | 5723 |
| 1861 | 1 | 4475 | 5419 |
| 1862 | 1 | 4475 | 5563 |
| 1863 | 1 | 4475 | 5566 |
| 1864 | 1 | 4475 | 5575 |
| 1865 | 1 | 4475 | 5578 |
| 1866 | 1 | 4475 | 5722 |
| 1867 | 1 | 4476 | 5403 |
| 1868 | 1 | 4476 | 5412 |
| 1869 | 1 | 4476 | 5424 |
| 1870 | 1 | 4476 | 5547 |
| 1871 | 1 | 4476 | 5559 |
| 1872 | 1 | 4476 | 5568 |
| 1873 | 1 | 4477 | 5558 |
| 1874 | 1 | 4477 | 5570 |
| 1875 | 1 | 4477 | 5573 |
| 1876 | 1 | 4477 | 5714 |
| 1877 | 1 | 4477 | 5717 |
| 1878 | 1 | 4477 | 5729 |
| 1879 | 1 | 4478 | 5425 |
| 1880 | 1 | 4478 | 5569 |
| 1881 | 1 | 4478 | 5572 |
| 1882 | 1 | 4478 | 5581 |
| 1883 | 1 | 4478 | 5584 |
| 1884 | 1 | 4478 | 5728 |
| 1885 | 1 | 4479 | 5418 |
| 1886 | 1 | 4479 | 5421 |
| 1887 | 1 | 4479 | 5430 |
| 1888 | 1 | 4479 | 5565 |
| 1889 | 1 | 4479 | 5574 |
| 1890 | 1 | 4479 | 5577 |
| 1891 | 1 | 4480 | 5564 |
| 1892 | 1 | 4480 | 5576 |
| 1893 | 1 | 4480 | 5579 |
| 1894 | 1 | 4480 | 5720 |
| 1895 | 1 | 4480 | 5723 |
| 1896 | 1 | 4480 | 5735 |
| 1897 | 1 | 4481 | 5431 |

|      |   |      |      |
|------|---|------|------|
| 1898 | 1 | 4481 | 5575 |
| 1899 | 1 | 4481 | 5578 |
| 1900 | 1 | 4481 | 5587 |
| 1901 | 1 | 4481 | 5590 |
| 1902 | 1 | 4481 | 5734 |
| 1903 | 1 | 4482 | 5415 |
| 1904 | 1 | 4482 | 5424 |
| 1905 | 1 | 4482 | 5436 |
| 1906 | 1 | 4482 | 5559 |
| 1907 | 1 | 4482 | 5571 |
| 1908 | 1 | 4482 | 5580 |
| 1909 | 1 | 4483 | 5570 |
| 1910 | 1 | 4483 | 5582 |
| 1911 | 1 | 4483 | 5585 |
| 1912 | 1 | 4483 | 5726 |
| 1913 | 1 | 4483 | 5729 |
| 1914 | 1 | 4483 | 5741 |
| 1915 | 1 | 4484 | 5437 |
| 1916 | 1 | 4484 | 5581 |
| 1917 | 1 | 4484 | 5584 |
| 1918 | 1 | 4484 | 5593 |
| 1919 | 1 | 4484 | 5596 |
| 1920 | 1 | 4484 | 5740 |
| 1921 | 1 | 4485 | 5430 |
| 1922 | 1 | 4485 | 5433 |
| 1923 | 1 | 4485 | 5442 |
| 1924 | 1 | 4485 | 5577 |
| 1925 | 1 | 4485 | 5586 |
| 1926 | 1 | 4485 | 5589 |
| 1927 | 1 | 4486 | 5576 |
| 1928 | 1 | 4486 | 5588 |
| 1929 | 1 | 4486 | 5591 |
| 1930 | 1 | 4486 | 5732 |
| 1931 | 1 | 4486 | 5735 |
| 1932 | 1 | 4486 | 5747 |
| 1933 | 1 | 4487 | 5443 |
| 1934 | 1 | 4487 | 5587 |
| 1935 | 1 | 4487 | 5590 |
| 1936 | 1 | 4487 | 5599 |
| 1937 | 1 | 4487 | 5602 |
| 1938 | 1 | 4487 | 5746 |
| 1939 | 1 | 4488 | 5427 |
| 1940 | 1 | 4488 | 5436 |
| 1941 | 1 | 4488 | 5448 |
| 1942 | 1 | 4488 | 5571 |
| 1943 | 1 | 4488 | 5583 |
| 1944 | 1 | 4488 | 5592 |
| 1945 | 1 | 4489 | 5582 |
| 1946 | 1 | 4489 | 5594 |
| 1947 | 1 | 4489 | 5597 |
| 1948 | 1 | 4489 | 5738 |

|      |   |      |      |
|------|---|------|------|
| 1949 | 1 | 4489 | 5741 |
| 1950 | 1 | 4489 | 5753 |
| 1951 | 1 | 4490 | 5449 |
| 1952 | 1 | 4490 | 5593 |
| 1953 | 1 | 4490 | 5596 |
| 1954 | 1 | 4490 | 5605 |
| 1955 | 1 | 4490 | 5608 |
| 1956 | 1 | 4490 | 5752 |
| 1957 | 1 | 4491 | 5442 |
| 1958 | 1 | 4491 | 5445 |
| 1959 | 1 | 4491 | 5454 |
| 1960 | 1 | 4491 | 5589 |
| 1961 | 1 | 4491 | 5598 |
| 1962 | 1 | 4491 | 5601 |
| 1963 | 1 | 4492 | 5588 |
| 1964 | 1 | 4492 | 5600 |
| 1965 | 1 | 4492 | 5603 |
| 1966 | 1 | 4492 | 5744 |
| 1967 | 1 | 4492 | 5747 |
| 1968 | 1 | 4492 | 5759 |
| 1969 | 1 | 4493 | 5455 |
| 1970 | 1 | 4493 | 5599 |
| 1971 | 1 | 4493 | 5602 |
| 1972 | 1 | 4493 | 5611 |
| 1973 | 1 | 4493 | 5614 |
| 1974 | 1 | 4493 | 5758 |
| 1975 | 1 | 4494 | 5439 |
| 1976 | 1 | 4494 | 5448 |
| 1977 | 1 | 4494 | 5460 |
| 1978 | 1 | 4494 | 5583 |
| 1979 | 1 | 4494 | 5595 |
| 1980 | 1 | 4494 | 5604 |
| 1981 | 1 | 4495 | 5594 |
| 1982 | 1 | 4495 | 5606 |
| 1983 | 1 | 4495 | 5609 |
| 1984 | 1 | 4495 | 5750 |
| 1985 | 1 | 4495 | 5753 |
| 1986 | 1 | 4495 | 5765 |
| 1987 | 1 | 4496 | 5461 |
| 1988 | 1 | 4496 | 5605 |
| 1989 | 1 | 4496 | 5608 |
| 1990 | 1 | 4496 | 5617 |
| 1991 | 1 | 4496 | 5620 |
| 1992 | 1 | 4496 | 5764 |
| 1993 | 1 | 4497 | 5454 |
| 1994 | 1 | 4497 | 5457 |
| 1995 | 1 | 4497 | 5466 |
| 1996 | 1 | 4497 | 5601 |
| 1997 | 1 | 4497 | 5610 |
| 1998 | 1 | 4497 | 5613 |
| 1999 | 1 | 4498 | 5600 |

|      |   |      |      |
|------|---|------|------|
| 2000 | 1 | 4498 | 5612 |
| 2001 | 1 | 4498 | 5615 |
| 2002 | 1 | 4498 | 5756 |
| 2003 | 1 | 4498 | 5759 |
| 2004 | 1 | 4498 | 5771 |
| 2005 | 1 | 4499 | 5467 |
| 2006 | 1 | 4499 | 5611 |
| 2007 | 1 | 4499 | 5614 |
| 2008 | 1 | 4499 | 5623 |
| 2009 | 1 | 4499 | 5626 |
| 2010 | 1 | 4499 | 5770 |
| 2011 | 1 | 4500 | 5451 |
| 2012 | 1 | 4500 | 5460 |
| 2013 | 1 | 4500 | 5472 |
| 2014 | 1 | 4500 | 5595 |
| 2015 | 1 | 4500 | 5607 |
| 2016 | 1 | 4500 | 5616 |
| 2017 | 1 | 4501 | 5606 |
| 2018 | 1 | 4501 | 5618 |
| 2019 | 1 | 4501 | 5621 |
| 2020 | 1 | 4501 | 5762 |
| 2021 | 1 | 4501 | 5765 |
| 2022 | 1 | 4501 | 5777 |
| 2023 | 1 | 4502 | 5473 |
| 2024 | 1 | 4502 | 5617 |
| 2025 | 1 | 4502 | 5620 |
| 2026 | 1 | 4502 | 5629 |
| 2027 | 1 | 4502 | 5632 |
| 2028 | 1 | 4502 | 5776 |
| 2029 | 1 | 4503 | 5466 |
| 2030 | 1 | 4503 | 5469 |
| 2031 | 1 | 4503 | 5478 |
| 2032 | 1 | 4503 | 5613 |
| 2033 | 1 | 4503 | 5622 |
| 2034 | 1 | 4503 | 5625 |
| 2035 | 1 | 4504 | 5612 |
| 2036 | 1 | 4504 | 5624 |
| 2037 | 1 | 4504 | 5627 |
| 2038 | 1 | 4504 | 5768 |
| 2039 | 1 | 4504 | 5771 |
| 2040 | 1 | 4504 | 5783 |
| 2041 | 1 | 4505 | 5479 |
| 2042 | 1 | 4505 | 5623 |
| 2043 | 1 | 4505 | 5626 |
| 2044 | 1 | 4505 | 5635 |
| 2045 | 1 | 4505 | 5638 |
| 2046 | 1 | 4505 | 5782 |
| 2047 | 1 | 4506 | 5463 |
| 2048 | 1 | 4506 | 5472 |
| 2049 | 1 | 4506 | 5484 |
| 2050 | 1 | 4506 | 5607 |

|      |   |      |      |
|------|---|------|------|
| 2051 | 1 | 4506 | 5619 |
| 2052 | 1 | 4506 | 5628 |
| 2053 | 1 | 4507 | 5618 |
| 2054 | 1 | 4507 | 5630 |
| 2055 | 1 | 4507 | 5633 |
| 2056 | 1 | 4507 | 5774 |
| 2057 | 1 | 4507 | 5777 |
| 2058 | 1 | 4508 | 5485 |
| 2059 | 1 | 4508 | 5629 |
| 2060 | 1 | 4508 | 5632 |
| 2061 | 1 | 4509 | 5478 |
| 2062 | 1 | 4509 | 5481 |
| 2063 | 1 | 4509 | 5490 |
| 2064 | 1 | 4509 | 5625 |
| 2065 | 1 | 4509 | 5634 |
| 2066 | 1 | 4509 | 5637 |
| 2067 | 1 | 4510 | 5624 |
| 2068 | 1 | 4510 | 5636 |
| 2069 | 1 | 4510 | 5639 |
| 2070 | 1 | 4510 | 5780 |
| 2071 | 1 | 4510 | 5783 |
| 2072 | 1 | 4511 | 5491 |
| 2073 | 1 | 4511 | 5635 |
| 2074 | 1 | 4511 | 5638 |
| 2075 | 1 | 4512 | 5475 |
| 2076 | 1 | 4512 | 5484 |
| 2077 | 1 | 4512 | 5496 |
| 2078 | 1 | 4512 | 5619 |
| 2079 | 1 | 4512 | 5631 |
| 2080 | 1 | 4512 | 5640 |
| 2081 | 1 | 4513 | 5642 |
| 2082 | 1 | 4513 | 5645 |
| 2083 | 1 | 4513 | 5786 |
| 2084 | 1 | 4513 | 5789 |
| 2085 | 1 | 4513 | 5801 |
| 2086 | 1 | 4514 | 5497 |
| 2087 | 1 | 4514 | 5641 |
| 2088 | 1 | 4514 | 5644 |
| 2089 | 1 | 4514 | 5653 |
| 2090 | 1 | 4514 | 5656 |
| 2091 | 1 | 4514 | 5800 |
| 2092 | 1 | 4515 | 5502 |
| 2093 | 1 | 4515 | 5646 |
| 2094 | 1 | 4515 | 5649 |
| 2095 | 1 | 4516 | 5648 |
| 2096 | 1 | 4516 | 5651 |
| 2097 | 1 | 4516 | 5792 |
| 2098 | 1 | 4516 | 5795 |
| 2099 | 1 | 4516 | 5807 |
| 2100 | 1 | 4517 | 5503 |
| 2101 | 1 | 4517 | 5647 |

|      |   |      |      |
|------|---|------|------|
| 2102 | 1 | 4517 | 5650 |
| 2103 | 1 | 4517 | 5659 |
| 2104 | 1 | 4517 | 5662 |
| 2105 | 1 | 4517 | 5806 |
| 2106 | 1 | 4518 | 5508 |
| 2107 | 1 | 4518 | 5643 |
| 2108 | 1 | 4518 | 5652 |
| 2109 | 1 | 4519 | 5642 |
| 2110 | 1 | 4519 | 5654 |
| 2111 | 1 | 4519 | 5657 |
| 2112 | 1 | 4519 | 5798 |
| 2113 | 1 | 4519 | 5801 |
| 2114 | 1 | 4519 | 5813 |
| 2115 | 1 | 4520 | 5509 |
| 2116 | 1 | 4520 | 5653 |
| 2117 | 1 | 4520 | 5656 |
| 2118 | 1 | 4520 | 5665 |
| 2119 | 1 | 4520 | 5668 |
| 2120 | 1 | 4520 | 5812 |
| 2121 | 1 | 4521 | 5502 |
| 2122 | 1 | 4521 | 5505 |
| 2123 | 1 | 4521 | 5514 |
| 2124 | 1 | 4521 | 5649 |
| 2125 | 1 | 4521 | 5658 |
| 2126 | 1 | 4521 | 5661 |
| 2127 | 1 | 4522 | 5648 |
| 2128 | 1 | 4522 | 5660 |
| 2129 | 1 | 4522 | 5663 |
| 2130 | 1 | 4522 | 5804 |
| 2131 | 1 | 4522 | 5807 |
| 2132 | 1 | 4522 | 5819 |
| 2133 | 1 | 4523 | 5515 |
| 2134 | 1 | 4523 | 5659 |
| 2135 | 1 | 4523 | 5662 |
| 2136 | 1 | 4523 | 5671 |
| 2137 | 1 | 4523 | 5674 |
| 2138 | 1 | 4523 | 5818 |
| 2139 | 1 | 4524 | 5499 |
| 2140 | 1 | 4524 | 5508 |
| 2141 | 1 | 4524 | 5520 |
| 2142 | 1 | 4524 | 5643 |
| 2143 | 1 | 4524 | 5655 |
| 2144 | 1 | 4524 | 5664 |
| 2145 | 1 | 4525 | 5654 |
| 2146 | 1 | 4525 | 5666 |
| 2147 | 1 | 4525 | 5669 |
| 2148 | 1 | 4525 | 5810 |
| 2149 | 1 | 4525 | 5813 |
| 2150 | 1 | 4525 | 5825 |
| 2151 | 1 | 4526 | 5521 |
| 2152 | 1 | 4526 | 5665 |

|      |   |      |      |
|------|---|------|------|
| 2153 | 1 | 4526 | 5668 |
| 2154 | 1 | 4526 | 5677 |
| 2155 | 1 | 4526 | 5680 |
| 2156 | 1 | 4526 | 5824 |
| 2157 | 1 | 4527 | 5514 |
| 2158 | 1 | 4527 | 5517 |
| 2159 | 1 | 4527 | 5526 |
| 2160 | 1 | 4527 | 5661 |
| 2161 | 1 | 4527 | 5670 |
| 2162 | 1 | 4527 | 5673 |
| 2163 | 1 | 4528 | 5660 |
| 2164 | 1 | 4528 | 5672 |
| 2165 | 1 | 4528 | 5675 |
| 2166 | 1 | 4528 | 5816 |
| 2167 | 1 | 4528 | 5819 |
| 2168 | 1 | 4528 | 5831 |
| 2169 | 1 | 4529 | 5527 |
| 2170 | 1 | 4529 | 5671 |
| 2171 | 1 | 4529 | 5674 |
| 2172 | 1 | 4529 | 5683 |
| 2173 | 1 | 4529 | 5686 |
| 2174 | 1 | 4529 | 5830 |
| 2175 | 1 | 4530 | 5511 |
| 2176 | 1 | 4530 | 5520 |
| 2177 | 1 | 4530 | 5532 |
| 2178 | 1 | 4530 | 5655 |
| 2179 | 1 | 4530 | 5667 |
| 2180 | 1 | 4530 | 5676 |
| 2181 | 1 | 4531 | 5666 |
| 2182 | 1 | 4531 | 5678 |
| 2183 | 1 | 4531 | 5681 |
| 2184 | 1 | 4531 | 5822 |
| 2185 | 1 | 4531 | 5825 |
| 2186 | 1 | 4531 | 5837 |
| 2187 | 1 | 4532 | 5533 |
| 2188 | 1 | 4532 | 5677 |
| 2189 | 1 | 4532 | 5680 |
| 2190 | 1 | 4532 | 5689 |
| 2191 | 1 | 4532 | 5692 |
| 2192 | 1 | 4532 | 5836 |
| 2193 | 1 | 4533 | 5526 |
| 2194 | 1 | 4533 | 5529 |
| 2195 | 1 | 4533 | 5538 |
| 2196 | 1 | 4533 | 5673 |
| 2197 | 1 | 4533 | 5682 |
| 2198 | 1 | 4533 | 5685 |
| 2199 | 1 | 4534 | 5672 |
| 2200 | 1 | 4534 | 5684 |
| 2201 | 1 | 4534 | 5687 |
| 2202 | 1 | 4534 | 5828 |
| 2203 | 1 | 4534 | 5831 |



|      |   |      |      |
|------|---|------|------|
| 2204 | 1 | 4534 | 5843 |
| 2205 | 1 | 4535 | 5539 |
| 2206 | 1 | 4535 | 5683 |
| 2207 | 1 | 4535 | 5686 |
| 2208 | 1 | 4535 | 5695 |
| 2209 | 1 | 4535 | 5698 |
| 2210 | 1 | 4535 | 5842 |
| 2211 | 1 | 4536 | 5523 |
| 2212 | 1 | 4536 | 5532 |
| 2213 | 1 | 4536 | 5544 |
| 2214 | 1 | 4536 | 5667 |
| 2215 | 1 | 4536 | 5679 |
| 2216 | 1 | 4536 | 5688 |
| 2217 | 1 | 4537 | 5678 |
| 2218 | 1 | 4537 | 5690 |
| 2219 | 1 | 4537 | 5693 |
| 2220 | 1 | 4537 | 5834 |
| 2221 | 1 | 4537 | 5837 |
| 2222 | 1 | 4537 | 5849 |
| 2223 | 1 | 4538 | 5545 |
| 2224 | 1 | 4538 | 5689 |
| 2225 | 1 | 4538 | 5692 |
| 2226 | 1 | 4538 | 5701 |
| 2227 | 1 | 4538 | 5704 |
| 2228 | 1 | 4538 | 5848 |
| 2229 | 1 | 4539 | 5538 |
| 2230 | 1 | 4539 | 5541 |
| 2231 | 1 | 4539 | 5550 |
| 2232 | 1 | 4539 | 5685 |
| 2233 | 1 | 4539 | 5694 |
| 2234 | 1 | 4539 | 5697 |
| 2235 | 1 | 4540 | 5684 |
| 2236 | 1 | 4540 | 5696 |
| 2237 | 1 | 4540 | 5699 |
| 2238 | 1 | 4540 | 5840 |
| 2239 | 1 | 4540 | 5843 |
| 2240 | 1 | 4540 | 5855 |
| 2241 | 1 | 4541 | 5551 |
| 2242 | 1 | 4541 | 5695 |
| 2243 | 1 | 4541 | 5698 |
| 2244 | 1 | 4541 | 5707 |
| 2245 | 1 | 4541 | 5710 |
| 2246 | 1 | 4541 | 5854 |
| 2247 | 1 | 4542 | 5535 |
| 2248 | 1 | 4542 | 5544 |
| 2249 | 1 | 4542 | 5556 |
| 2250 | 1 | 4542 | 5679 |
| 2251 | 1 | 4542 | 5691 |
| 2252 | 1 | 4542 | 5700 |
| 2253 | 1 | 4543 | 5690 |
| 2254 | 1 | 4543 | 5702 |

|      |   |      |      |
|------|---|------|------|
| 2255 | 1 | 4543 | 5705 |
| 2256 | 1 | 4543 | 5846 |
| 2257 | 1 | 4543 | 5849 |
| 2258 | 1 | 4543 | 5861 |
| 2259 | 1 | 4544 | 5557 |
| 2260 | 1 | 4544 | 5701 |
| 2261 | 1 | 4544 | 5704 |
| 2262 | 1 | 4544 | 5713 |
| 2263 | 1 | 4544 | 5716 |
| 2264 | 1 | 4544 | 5860 |
| 2265 | 1 | 4545 | 5550 |
| 2266 | 1 | 4545 | 5553 |
| 2267 | 1 | 4545 | 5562 |
| 2268 | 1 | 4545 | 5697 |
| 2269 | 1 | 4545 | 5706 |
| 2270 | 1 | 4545 | 5709 |
| 2271 | 1 | 4546 | 5696 |
| 2272 | 1 | 4546 | 5708 |
| 2273 | 1 | 4546 | 5711 |
| 2274 | 1 | 4546 | 5852 |
| 2275 | 1 | 4546 | 5855 |
| 2276 | 1 | 4546 | 5867 |
| 2277 | 1 | 4547 | 5563 |
| 2278 | 1 | 4547 | 5707 |
| 2279 | 1 | 4547 | 5710 |
| 2280 | 1 | 4547 | 5719 |
| 2281 | 1 | 4547 | 5722 |
| 2282 | 1 | 4547 | 5866 |
| 2283 | 1 | 4548 | 5547 |
| 2284 | 1 | 4548 | 5556 |
| 2285 | 1 | 4548 | 5568 |
| 2286 | 1 | 4548 | 5691 |
| 2287 | 1 | 4548 | 5703 |
| 2288 | 1 | 4548 | 5712 |
| 2289 | 1 | 4549 | 5702 |
| 2290 | 1 | 4549 | 5714 |
| 2291 | 1 | 4549 | 5717 |
| 2292 | 1 | 4549 | 5858 |
| 2293 | 1 | 4549 | 5861 |
| 2294 | 1 | 4549 | 5873 |
| 2295 | 1 | 4550 | 5569 |
| 2296 | 1 | 4550 | 5713 |
| 2297 | 1 | 4550 | 5716 |
| 2298 | 1 | 4550 | 5725 |
| 2299 | 1 | 4550 | 5728 |
| 2300 | 1 | 4550 | 5872 |
| 2301 | 1 | 4551 | 5562 |
| 2302 | 1 | 4551 | 5565 |
| 2303 | 1 | 4551 | 5574 |
| 2304 | 1 | 4551 | 5709 |
| 2305 | 1 | 4551 | 5718 |

|      |   |      |      |
|------|---|------|------|
| 2306 | 1 | 4551 | 5721 |
| 2307 | 1 | 4552 | 5708 |
| 2308 | 1 | 4552 | 5720 |
| 2309 | 1 | 4552 | 5723 |
| 2310 | 1 | 4552 | 5864 |
| 2311 | 1 | 4552 | 5867 |
| 2312 | 1 | 4552 | 5879 |
| 2313 | 1 | 4553 | 5575 |
| 2314 | 1 | 4553 | 5719 |
| 2315 | 1 | 4553 | 5722 |
| 2316 | 1 | 4553 | 5731 |
| 2317 | 1 | 4553 | 5734 |
| 2318 | 1 | 4553 | 5878 |
| 2319 | 1 | 4554 | 5559 |
| 2320 | 1 | 4554 | 5568 |
| 2321 | 1 | 4554 | 5580 |
| 2322 | 1 | 4554 | 5703 |
| 2323 | 1 | 4554 | 5715 |
| 2324 | 1 | 4554 | 5724 |
| 2325 | 1 | 4555 | 5714 |
| 2326 | 1 | 4555 | 5726 |
| 2327 | 1 | 4555 | 5729 |
| 2328 | 1 | 4555 | 5870 |
| 2329 | 1 | 4555 | 5873 |
| 2330 | 1 | 4555 | 5885 |
| 2331 | 1 | 4556 | 5581 |
| 2332 | 1 | 4556 | 5725 |
| 2333 | 1 | 4556 | 5728 |
| 2334 | 1 | 4556 | 5737 |
| 2335 | 1 | 4556 | 5740 |
| 2336 | 1 | 4556 | 5884 |
| 2337 | 1 | 4557 | 5574 |
| 2338 | 1 | 4557 | 5577 |
| 2339 | 1 | 4557 | 5586 |
| 2340 | 1 | 4557 | 5721 |
| 2341 | 1 | 4557 | 5730 |
| 2342 | 1 | 4557 | 5733 |
| 2343 | 1 | 4558 | 5720 |
| 2344 | 1 | 4558 | 5732 |
| 2345 | 1 | 4558 | 5735 |
| 2346 | 1 | 4558 | 5876 |
| 2347 | 1 | 4558 | 5879 |
| 2348 | 1 | 4558 | 5891 |
| 2349 | 1 | 4559 | 5587 |
| 2350 | 1 | 4559 | 5731 |
| 2351 | 1 | 4559 | 5734 |
| 2352 | 1 | 4559 | 5743 |
| 2353 | 1 | 4559 | 5746 |
| 2354 | 1 | 4559 | 5890 |
| 2355 | 1 | 4560 | 5571 |
| 2356 | 1 | 4560 | 5580 |

|      |   |      |      |
|------|---|------|------|
| 2357 | 1 | 4560 | 5592 |
| 2358 | 1 | 4560 | 5715 |
| 2359 | 1 | 4560 | 5727 |
| 2360 | 1 | 4560 | 5736 |
| 2361 | 1 | 4561 | 5726 |
| 2362 | 1 | 4561 | 5738 |
| 2363 | 1 | 4561 | 5741 |
| 2364 | 1 | 4561 | 5882 |
| 2365 | 1 | 4561 | 5885 |
| 2366 | 1 | 4561 | 5897 |
| 2367 | 1 | 4562 | 5593 |
| 2368 | 1 | 4562 | 5737 |
| 2369 | 1 | 4562 | 5740 |
| 2370 | 1 | 4562 | 5749 |
| 2371 | 1 | 4562 | 5752 |
| 2372 | 1 | 4562 | 5896 |
| 2373 | 1 | 4563 | 5586 |
| 2374 | 1 | 4563 | 5589 |
| 2375 | 1 | 4563 | 5598 |
| 2376 | 1 | 4563 | 5733 |
| 2377 | 1 | 4563 | 5742 |
| 2378 | 1 | 4563 | 5745 |
| 2379 | 1 | 4564 | 5732 |
| 2380 | 1 | 4564 | 5744 |
| 2381 | 1 | 4564 | 5747 |
| 2382 | 1 | 4564 | 5888 |
| 2383 | 1 | 4564 | 5891 |
| 2384 | 1 | 4564 | 5903 |
| 2385 | 1 | 4565 | 5599 |
| 2386 | 1 | 4565 | 5743 |
| 2387 | 1 | 4565 | 5746 |
| 2388 | 1 | 4565 | 5755 |
| 2389 | 1 | 4565 | 5758 |
| 2390 | 1 | 4565 | 5902 |
| 2391 | 1 | 4566 | 5583 |
| 2392 | 1 | 4566 | 5592 |
| 2393 | 1 | 4566 | 5604 |
| 2394 | 1 | 4566 | 5727 |
| 2395 | 1 | 4566 | 5739 |
| 2396 | 1 | 4566 | 5748 |
| 2397 | 1 | 4567 | 5738 |
| 2398 | 1 | 4567 | 5750 |
| 2399 | 1 | 4567 | 5753 |
| 2400 | 1 | 4567 | 5894 |
| 2401 | 1 | 4567 | 5897 |
| 2402 | 1 | 4567 | 5909 |
| 2403 | 1 | 4568 | 5605 |
| 2404 | 1 | 4568 | 5749 |
| 2405 | 1 | 4568 | 5752 |
| 2406 | 1 | 4568 | 5761 |
| 2407 | 1 | 4568 | 5764 |

|      |   |      |      |
|------|---|------|------|
| 2408 | 1 | 4568 | 5908 |
| 2409 | 1 | 4569 | 5598 |
| 2410 | 1 | 4569 | 5601 |
| 2411 | 1 | 4569 | 5610 |
| 2412 | 1 | 4569 | 5745 |
| 2413 | 1 | 4569 | 5754 |
| 2414 | 1 | 4569 | 5757 |
| 2415 | 1 | 4570 | 5744 |
| 2416 | 1 | 4570 | 5756 |
| 2417 | 1 | 4570 | 5759 |
| 2418 | 1 | 4570 | 5900 |
| 2419 | 1 | 4570 | 5903 |
| 2420 | 1 | 4570 | 5915 |
| 2421 | 1 | 4571 | 5611 |
| 2422 | 1 | 4571 | 5755 |
| 2423 | 1 | 4571 | 5758 |
| 2424 | 1 | 4571 | 5767 |
| 2425 | 1 | 4571 | 5770 |
| 2426 | 1 | 4571 | 5914 |
| 2427 | 1 | 4572 | 5595 |
| 2428 | 1 | 4572 | 5604 |
| 2429 | 1 | 4572 | 5616 |
| 2430 | 1 | 4572 | 5739 |
| 2431 | 1 | 4572 | 5751 |
| 2432 | 1 | 4572 | 5760 |
| 2433 | 1 | 4573 | 5750 |
| 2434 | 1 | 4573 | 5762 |
| 2435 | 1 | 4573 | 5765 |
| 2436 | 1 | 4573 | 5906 |
| 2437 | 1 | 4573 | 5909 |
| 2438 | 1 | 4573 | 5921 |
| 2439 | 1 | 4574 | 5617 |
| 2440 | 1 | 4574 | 5761 |
| 2441 | 1 | 4574 | 5764 |
| 2442 | 1 | 4574 | 5773 |
| 2443 | 1 | 4574 | 5776 |
| 2444 | 1 | 4574 | 5920 |
| 2445 | 1 | 4575 | 5610 |
| 2446 | 1 | 4575 | 5613 |
| 2447 | 1 | 4575 | 5622 |
| 2448 | 1 | 4575 | 5757 |
| 2449 | 1 | 4575 | 5766 |
| 2450 | 1 | 4575 | 5769 |
| 2451 | 1 | 4576 | 5756 |
| 2452 | 1 | 4576 | 5768 |
| 2453 | 1 | 4576 | 5771 |
| 2454 | 1 | 4576 | 5912 |
| 2455 | 1 | 4576 | 5915 |
| 2456 | 1 | 4576 | 5927 |
| 2457 | 1 | 4577 | 5623 |
| 2458 | 1 | 4577 | 5767 |

|      |   |      |      |
|------|---|------|------|
| 2459 | 1 | 4577 | 5770 |
| 2460 | 1 | 4577 | 5779 |
| 2461 | 1 | 4577 | 5782 |
| 2462 | 1 | 4577 | 5926 |
| 2463 | 1 | 4578 | 5607 |
| 2464 | 1 | 4578 | 5616 |
| 2465 | 1 | 4578 | 5628 |
| 2466 | 1 | 4578 | 5751 |
| 2467 | 1 | 4578 | 5763 |
| 2468 | 1 | 4578 | 5772 |
| 2469 | 1 | 4579 | 5762 |
| 2470 | 1 | 4579 | 5774 |
| 2471 | 1 | 4579 | 5777 |
| 2472 | 1 | 4579 | 5918 |
| 2473 | 1 | 4579 | 5921 |
| 2474 | 1 | 4580 | 5629 |
| 2475 | 1 | 4580 | 5773 |
| 2476 | 1 | 4580 | 5776 |
| 2477 | 1 | 4581 | 5622 |
| 2478 | 1 | 4581 | 5625 |
| 2479 | 1 | 4581 | 5634 |
| 2480 | 1 | 4581 | 5769 |
| 2481 | 1 | 4581 | 5778 |
| 2482 | 1 | 4581 | 5781 |
| 2483 | 1 | 4582 | 5768 |
| 2484 | 1 | 4582 | 5780 |
| 2485 | 1 | 4582 | 5783 |
| 2486 | 1 | 4582 | 5924 |
| 2487 | 1 | 4582 | 5927 |
| 2488 | 1 | 4583 | 5635 |
| 2489 | 1 | 4583 | 5779 |
| 2490 | 1 | 4583 | 5782 |
| 2491 | 1 | 4584 | 5619 |
| 2492 | 1 | 4584 | 5628 |
| 2493 | 1 | 4584 | 5640 |
| 2494 | 1 | 4584 | 5763 |
| 2495 | 1 | 4584 | 5775 |
| 2496 | 1 | 4584 | 5784 |
| 2497 | 1 | 4585 | 5786 |
| 2498 | 1 | 4585 | 5789 |
| 2499 | 1 | 4585 | 5929 |
| 2500 | 1 | 4585 | 5932 |
| 2501 | 1 | 4585 | 5941 |
| 2502 | 1 | 4586 | 5641 |
| 2503 | 1 | 4586 | 5785 |
| 2504 | 1 | 4586 | 5788 |
| 2505 | 1 | 4586 | 5797 |
| 2506 | 1 | 4586 | 5800 |
| 2507 | 1 | 4586 | 5940 |
| 2508 | 1 | 4587 | 5646 |
| 2509 | 1 | 4587 | 5790 |

|      |   |      |      |
|------|---|------|------|
| 2510 | 1 | 4587 | 5793 |
| 2511 | 1 | 4588 | 5792 |
| 2512 | 1 | 4588 | 5795 |
| 2513 | 1 | 4588 | 5933 |
| 2514 | 1 | 4588 | 5936 |
| 2515 | 1 | 4588 | 5947 |
| 2516 | 1 | 4589 | 5647 |
| 2517 | 1 | 4589 | 5791 |
| 2518 | 1 | 4589 | 5794 |
| 2519 | 1 | 4589 | 5803 |
| 2520 | 1 | 4589 | 5806 |
| 2521 | 1 | 4589 | 5946 |
| 2522 | 1 | 4590 | 5652 |
| 2523 | 1 | 4590 | 5787 |
| 2524 | 1 | 4590 | 5796 |
| 2525 | 1 | 4591 | 5786 |
| 2526 | 1 | 4591 | 5798 |
| 2527 | 1 | 4591 | 5801 |
| 2528 | 1 | 4591 | 5938 |
| 2529 | 1 | 4591 | 5941 |
| 2530 | 1 | 4591 | 5953 |
| 2531 | 1 | 4592 | 5653 |
| 2532 | 1 | 4592 | 5797 |
| 2533 | 1 | 4592 | 5800 |
| 2534 | 1 | 4592 | 5809 |
| 2535 | 1 | 4592 | 5812 |
| 2536 | 1 | 4592 | 5952 |
| 2537 | 1 | 4593 | 5646 |
| 2538 | 1 | 4593 | 5649 |
| 2539 | 1 | 4593 | 5658 |
| 2540 | 1 | 4593 | 5793 |
| 2541 | 1 | 4593 | 5802 |
| 2542 | 1 | 4593 | 5805 |
| 2543 | 1 | 4594 | 5792 |
| 2544 | 1 | 4594 | 5804 |
| 2545 | 1 | 4594 | 5807 |
| 2546 | 1 | 4594 | 5944 |
| 2547 | 1 | 4594 | 5947 |
| 2548 | 1 | 4594 | 5959 |
| 2549 | 1 | 4595 | 5659 |
| 2550 | 1 | 4595 | 5803 |
| 2551 | 1 | 4595 | 5806 |
| 2552 | 1 | 4595 | 5815 |
| 2553 | 1 | 4595 | 5818 |
| 2554 | 1 | 4595 | 5958 |
| 2555 | 1 | 4596 | 5643 |
| 2556 | 1 | 4596 | 5652 |
| 2557 | 1 | 4596 | 5664 |
| 2558 | 1 | 4596 | 5787 |
| 2559 | 1 | 4596 | 5799 |
| 2560 | 1 | 4596 | 5808 |

|      |   |      |      |
|------|---|------|------|
| 2561 | 1 | 4597 | 5798 |
| 2562 | 1 | 4597 | 5810 |
| 2563 | 1 | 4597 | 5813 |
| 2564 | 1 | 4597 | 5950 |
| 2565 | 1 | 4597 | 5953 |
| 2566 | 1 | 4597 | 5965 |
| 2567 | 1 | 4598 | 5665 |
| 2568 | 1 | 4598 | 5809 |
| 2569 | 1 | 4598 | 5812 |
| 2570 | 1 | 4598 | 5821 |
| 2571 | 1 | 4598 | 5824 |
| 2572 | 1 | 4598 | 5964 |
| 2573 | 1 | 4599 | 5658 |
| 2574 | 1 | 4599 | 5661 |
| 2575 | 1 | 4599 | 5670 |
| 2576 | 1 | 4599 | 5805 |
| 2577 | 1 | 4599 | 5814 |
| 2578 | 1 | 4599 | 5817 |
| 2579 | 1 | 4600 | 5804 |
| 2580 | 1 | 4600 | 5816 |
| 2581 | 1 | 4600 | 5819 |
| 2582 | 1 | 4600 | 5956 |
| 2583 | 1 | 4600 | 5959 |
| 2584 | 1 | 4600 | 5971 |
| 2585 | 1 | 4601 | 5671 |
| 2586 | 1 | 4601 | 5815 |
| 2587 | 1 | 4601 | 5818 |
| 2588 | 1 | 4601 | 5827 |
| 2589 | 1 | 4601 | 5830 |
| 2590 | 1 | 4601 | 5970 |
| 2591 | 1 | 4602 | 5655 |
| 2592 | 1 | 4602 | 5664 |
| 2593 | 1 | 4602 | 5676 |
| 2594 | 1 | 4602 | 5799 |
| 2595 | 1 | 4602 | 5811 |
| 2596 | 1 | 4602 | 5820 |
| 2597 | 1 | 4603 | 5810 |
| 2598 | 1 | 4603 | 5822 |
| 2599 | 1 | 4603 | 5825 |
| 2600 | 1 | 4603 | 5962 |
| 2601 | 1 | 4603 | 5965 |
| 2602 | 1 | 4603 | 5977 |
| 2603 | 1 | 4604 | 5677 |
| 2604 | 1 | 4604 | 5821 |
| 2605 | 1 | 4604 | 5824 |
| 2606 | 1 | 4604 | 5833 |
| 2607 | 1 | 4604 | 5836 |
| 2608 | 1 | 4604 | 5976 |
| 2609 | 1 | 4605 | 5670 |
| 2610 | 1 | 4605 | 5673 |
| 2611 | 1 | 4605 | 5682 |



|      |   |      |      |
|------|---|------|------|
| 2612 | 1 | 4605 | 5817 |
| 2613 | 1 | 4605 | 5826 |
| 2614 | 1 | 4605 | 5829 |
| 2615 | 1 | 4606 | 5816 |
| 2616 | 1 | 4606 | 5828 |
| 2617 | 1 | 4606 | 5831 |
| 2618 | 1 | 4606 | 5968 |
| 2619 | 1 | 4606 | 5971 |
| 2620 | 1 | 4606 | 5983 |
| 2621 | 1 | 4607 | 5683 |
| 2622 | 1 | 4607 | 5827 |
| 2623 | 1 | 4607 | 5830 |
| 2624 | 1 | 4607 | 5839 |
| 2625 | 1 | 4607 | 5842 |
| 2626 | 1 | 4607 | 5982 |
| 2627 | 1 | 4608 | 5667 |
| 2628 | 1 | 4608 | 5676 |
| 2629 | 1 | 4608 | 5688 |
| 2630 | 1 | 4608 | 5811 |
| 2631 | 1 | 4608 | 5823 |
| 2632 | 1 | 4608 | 5832 |
| 2633 | 1 | 4609 | 5822 |
| 2634 | 1 | 4609 | 5834 |
| 2635 | 1 | 4609 | 5837 |
| 2636 | 1 | 4609 | 5974 |
| 2637 | 1 | 4609 | 5977 |
| 2638 | 1 | 4609 | 5989 |
| 2639 | 1 | 4610 | 5689 |
| 2640 | 1 | 4610 | 5833 |
| 2641 | 1 | 4610 | 5836 |
| 2642 | 1 | 4610 | 5845 |
| 2643 | 1 | 4610 | 5848 |
| 2644 | 1 | 4610 | 5988 |
| 2645 | 1 | 4611 | 5682 |
| 2646 | 1 | 4611 | 5685 |
| 2647 | 1 | 4611 | 5694 |
| 2648 | 1 | 4611 | 5829 |
| 2649 | 1 | 4611 | 5838 |
| 2650 | 1 | 4611 | 5841 |
| 2651 | 1 | 4612 | 5828 |
| 2652 | 1 | 4612 | 5840 |
| 2653 | 1 | 4612 | 5843 |
| 2654 | 1 | 4612 | 5980 |
| 2655 | 1 | 4612 | 5983 |
| 2656 | 1 | 4612 | 5995 |
| 2657 | 1 | 4613 | 5695 |
| 2658 | 1 | 4613 | 5839 |
| 2659 | 1 | 4613 | 5842 |
| 2660 | 1 | 4613 | 5851 |
| 2661 | 1 | 4613 | 5854 |
| 2662 | 1 | 4613 | 5994 |

|      |   |      |      |
|------|---|------|------|
| 2663 | 1 | 4614 | 5679 |
| 2664 | 1 | 4614 | 5688 |
| 2665 | 1 | 4614 | 5700 |
| 2666 | 1 | 4614 | 5823 |
| 2667 | 1 | 4614 | 5835 |
| 2668 | 1 | 4614 | 5844 |
| 2669 | 1 | 4615 | 5834 |
| 2670 | 1 | 4615 | 5846 |
| 2671 | 1 | 4615 | 5849 |
| 2672 | 1 | 4615 | 5986 |
| 2673 | 1 | 4615 | 5989 |
| 2674 | 1 | 4615 | 6001 |
| 2675 | 1 | 4616 | 5701 |
| 2676 | 1 | 4616 | 5845 |
| 2677 | 1 | 4616 | 5848 |
| 2678 | 1 | 4616 | 5857 |
| 2679 | 1 | 4616 | 5860 |
| 2680 | 1 | 4616 | 6000 |
| 2681 | 1 | 4617 | 5694 |
| 2682 | 1 | 4617 | 5697 |
| 2683 | 1 | 4617 | 5706 |
| 2684 | 1 | 4617 | 5841 |
| 2685 | 1 | 4617 | 5850 |
| 2686 | 1 | 4617 | 5853 |
| 2687 | 1 | 4618 | 5840 |
| 2688 | 1 | 4618 | 5852 |
| 2689 | 1 | 4618 | 5855 |
| 2690 | 1 | 4618 | 5992 |
| 2691 | 1 | 4618 | 5995 |
| 2692 | 1 | 4618 | 6007 |
| 2693 | 1 | 4619 | 5707 |
| 2694 | 1 | 4619 | 5851 |
| 2695 | 1 | 4619 | 5854 |
| 2696 | 1 | 4619 | 5863 |
| 2697 | 1 | 4619 | 5866 |
| 2698 | 1 | 4619 | 6006 |
| 2699 | 1 | 4620 | 5691 |
| 2700 | 1 | 4620 | 5700 |
| 2701 | 1 | 4620 | 5712 |
| 2702 | 1 | 4620 | 5835 |
| 2703 | 1 | 4620 | 5847 |
| 2704 | 1 | 4620 | 5856 |
| 2705 | 1 | 4621 | 5846 |
| 2706 | 1 | 4621 | 5858 |
| 2707 | 1 | 4621 | 5861 |
| 2708 | 1 | 4621 | 5998 |
| 2709 | 1 | 4621 | 6001 |
| 2710 | 1 | 4621 | 6013 |
| 2711 | 1 | 4622 | 5713 |
| 2712 | 1 | 4622 | 5857 |
| 2713 | 1 | 4622 | 5860 |

|      |   |      |      |
|------|---|------|------|
| 2714 | 1 | 4622 | 5869 |
| 2715 | 1 | 4622 | 5872 |
| 2716 | 1 | 4622 | 6012 |
| 2717 | 1 | 4623 | 5706 |
| 2718 | 1 | 4623 | 5709 |
| 2719 | 1 | 4623 | 5718 |
| 2720 | 1 | 4623 | 5853 |
| 2721 | 1 | 4623 | 5862 |
| 2722 | 1 | 4623 | 5865 |
| 2723 | 1 | 4624 | 5852 |
| 2724 | 1 | 4624 | 5864 |
| 2725 | 1 | 4624 | 5867 |
| 2726 | 1 | 4624 | 6004 |
| 2727 | 1 | 4624 | 6007 |
| 2728 | 1 | 4624 | 6019 |
| 2729 | 1 | 4625 | 5719 |
| 2730 | 1 | 4625 | 5863 |
| 2731 | 1 | 4625 | 5866 |
| 2732 | 1 | 4625 | 5875 |
| 2733 | 1 | 4625 | 5878 |
| 2734 | 1 | 4625 | 6018 |
| 2735 | 1 | 4626 | 5703 |
| 2736 | 1 | 4626 | 5712 |
| 2737 | 1 | 4626 | 5724 |
| 2738 | 1 | 4626 | 5847 |
| 2739 | 1 | 4626 | 5859 |
| 2740 | 1 | 4626 | 5868 |
| 2741 | 1 | 4627 | 5858 |
| 2742 | 1 | 4627 | 5870 |
| 2743 | 1 | 4627 | 5873 |
| 2744 | 1 | 4627 | 6010 |
| 2745 | 1 | 4627 | 6013 |
| 2746 | 1 | 4627 | 6025 |
| 2747 | 1 | 4628 | 5725 |
| 2748 | 1 | 4628 | 5869 |
| 2749 | 1 | 4628 | 5872 |
| 2750 | 1 | 4628 | 5881 |
| 2751 | 1 | 4628 | 5884 |
| 2752 | 1 | 4628 | 6024 |
| 2753 | 1 | 4629 | 5718 |
| 2754 | 1 | 4629 | 5721 |
| 2755 | 1 | 4629 | 5730 |
| 2756 | 1 | 4629 | 5865 |
| 2757 | 1 | 4629 | 5874 |
| 2758 | 1 | 4629 | 5877 |
| 2759 | 1 | 4630 | 5864 |
| 2760 | 1 | 4630 | 5876 |
| 2761 | 1 | 4630 | 5879 |
| 2762 | 1 | 4630 | 6016 |
| 2763 | 1 | 4630 | 6019 |
| 2764 | 1 | 4630 | 6031 |

|      |   |      |      |
|------|---|------|------|
| 2765 | 1 | 4631 | 5731 |
| 2766 | 1 | 4631 | 5875 |
| 2767 | 1 | 4631 | 5878 |
| 2768 | 1 | 4631 | 5887 |
| 2769 | 1 | 4631 | 5890 |
| 2770 | 1 | 4631 | 6030 |
| 2771 | 1 | 4632 | 5715 |
| 2772 | 1 | 4632 | 5724 |
| 2773 | 1 | 4632 | 5736 |
| 2774 | 1 | 4632 | 5859 |
| 2775 | 1 | 4632 | 5871 |
| 2776 | 1 | 4632 | 5880 |
| 2777 | 1 | 4633 | 5870 |
| 2778 | 1 | 4633 | 5882 |
| 2779 | 1 | 4633 | 5885 |
| 2780 | 1 | 4633 | 6022 |
| 2781 | 1 | 4633 | 6025 |
| 2782 | 1 | 4633 | 6037 |
| 2783 | 1 | 4634 | 5737 |
| 2784 | 1 | 4634 | 5881 |
| 2785 | 1 | 4634 | 5884 |
| 2786 | 1 | 4634 | 5893 |
| 2787 | 1 | 4634 | 5896 |
| 2788 | 1 | 4634 | 6036 |
| 2789 | 1 | 4635 | 5730 |
| 2790 | 1 | 4635 | 5733 |
| 2791 | 1 | 4635 | 5742 |
| 2792 | 1 | 4635 | 5877 |
| 2793 | 1 | 4635 | 5886 |
| 2794 | 1 | 4635 | 5889 |
| 2795 | 1 | 4636 | 5876 |
| 2796 | 1 | 4636 | 5888 |
| 2797 | 1 | 4636 | 5891 |
| 2798 | 1 | 4636 | 6028 |
| 2799 | 1 | 4636 | 6031 |
| 2800 | 1 | 4636 | 6043 |
| 2801 | 1 | 4637 | 5743 |
| 2802 | 1 | 4637 | 5887 |
| 2803 | 1 | 4637 | 5890 |
| 2804 | 1 | 4637 | 5899 |
| 2805 | 1 | 4637 | 5902 |
| 2806 | 1 | 4637 | 6042 |
| 2807 | 1 | 4638 | 5727 |
| 2808 | 1 | 4638 | 5736 |
| 2809 | 1 | 4638 | 5748 |
| 2810 | 1 | 4638 | 5871 |
| 2811 | 1 | 4638 | 5883 |
| 2812 | 1 | 4638 | 5892 |
| 2813 | 1 | 4639 | 5882 |
| 2814 | 1 | 4639 | 5894 |
| 2815 | 1 | 4639 | 5897 |

|      |   |      |      |
|------|---|------|------|
| 2816 | 1 | 4639 | 6034 |
| 2817 | 1 | 4639 | 6037 |
| 2818 | 1 | 4639 | 6049 |
| 2819 | 1 | 4640 | 5749 |
| 2820 | 1 | 4640 | 5893 |
| 2821 | 1 | 4640 | 5896 |
| 2822 | 1 | 4640 | 5905 |
| 2823 | 1 | 4640 | 5908 |
| 2824 | 1 | 4640 | 6048 |
| 2825 | 1 | 4641 | 5742 |
| 2826 | 1 | 4641 | 5745 |
| 2827 | 1 | 4641 | 5754 |
| 2828 | 1 | 4641 | 5889 |
| 2829 | 1 | 4641 | 5898 |
| 2830 | 1 | 4641 | 5901 |
| 2831 | 1 | 4642 | 5888 |
| 2832 | 1 | 4642 | 5900 |
| 2833 | 1 | 4642 | 5903 |
| 2834 | 1 | 4642 | 6040 |
| 2835 | 1 | 4642 | 6043 |
| 2836 | 1 | 4642 | 6055 |
| 2837 | 1 | 4643 | 5755 |
| 2838 | 1 | 4643 | 5899 |
| 2839 | 1 | 4643 | 5902 |
| 2840 | 1 | 4643 | 5911 |
| 2841 | 1 | 4643 | 5914 |
| 2842 | 1 | 4643 | 6054 |
| 2843 | 1 | 4644 | 5739 |
| 2844 | 1 | 4644 | 5748 |
| 2845 | 1 | 4644 | 5760 |
| 2846 | 1 | 4644 | 5883 |
| 2847 | 1 | 4644 | 5895 |
| 2848 | 1 | 4644 | 5904 |
| 2849 | 1 | 4645 | 5894 |
| 2850 | 1 | 4645 | 5906 |
| 2851 | 1 | 4645 | 5909 |
| 2852 | 1 | 4645 | 6046 |
| 2853 | 1 | 4645 | 6049 |
| 2854 | 1 | 4645 | 6061 |
| 2855 | 1 | 4646 | 5761 |
| 2856 | 1 | 4646 | 5905 |
| 2857 | 1 | 4646 | 5908 |
| 2858 | 1 | 4646 | 5917 |
| 2859 | 1 | 4646 | 5920 |
| 2860 | 1 | 4646 | 6060 |
| 2861 | 1 | 4647 | 5754 |
| 2862 | 1 | 4647 | 5757 |
| 2863 | 1 | 4647 | 5766 |
| 2864 | 1 | 4647 | 5901 |
| 2865 | 1 | 4647 | 5910 |
| 2866 | 1 | 4647 | 5913 |

|      |   |      |      |
|------|---|------|------|
| 2867 | 1 | 4648 | 5900 |
| 2868 | 1 | 4648 | 5912 |
| 2869 | 1 | 4648 | 5915 |
| 2870 | 1 | 4648 | 6052 |
| 2871 | 1 | 4648 | 6055 |
| 2872 | 1 | 4648 | 6067 |
| 2873 | 1 | 4649 | 5767 |
| 2874 | 1 | 4649 | 5911 |
| 2875 | 1 | 4649 | 5914 |
| 2876 | 1 | 4649 | 5923 |
| 2877 | 1 | 4649 | 5926 |
| 2878 | 1 | 4649 | 6066 |
| 2879 | 1 | 4650 | 5751 |
| 2880 | 1 | 4650 | 5760 |
| 2881 | 1 | 4650 | 5772 |
| 2882 | 1 | 4650 | 5895 |
| 2883 | 1 | 4650 | 5907 |
| 2884 | 1 | 4650 | 5916 |
| 2885 | 1 | 4651 | 5906 |
| 2886 | 1 | 4651 | 5918 |
| 2887 | 1 | 4651 | 5921 |
| 2888 | 1 | 4651 | 6058 |
| 2889 | 1 | 4651 | 6061 |
| 2890 | 1 | 4652 | 5773 |
| 2891 | 1 | 4652 | 5917 |
| 2892 | 1 | 4652 | 5920 |
| 2893 | 1 | 4653 | 5766 |
| 2894 | 1 | 4653 | 5769 |
| 2895 | 1 | 4653 | 5778 |
| 2896 | 1 | 4653 | 5913 |
| 2897 | 1 | 4653 | 5922 |
| 2898 | 1 | 4653 | 5925 |
| 2899 | 1 | 4654 | 5912 |
| 2900 | 1 | 4654 | 5924 |
| 2901 | 1 | 4654 | 5927 |
| 2902 | 1 | 4654 | 6064 |
| 2903 | 1 | 4654 | 6067 |
| 2904 | 1 | 4655 | 5779 |
| 2905 | 1 | 4655 | 5923 |
| 2906 | 1 | 4655 | 5926 |
| 2907 | 1 | 4656 | 5763 |
| 2908 | 1 | 4656 | 5772 |
| 2909 | 1 | 4656 | 5784 |
| 2910 | 1 | 4656 | 5907 |
| 2911 | 1 | 4656 | 5919 |
| 2912 | 1 | 4656 | 5928 |
| 2913 | 1 | 4657 | 5785 |
| 2914 | 1 | 4657 | 5931 |
| 2915 | 1 | 4657 | 5937 |
| 2916 | 1 | 4657 | 5940 |
| 2917 | 1 | 4658 | 5790 |

|      |   |      |      |
|------|---|------|------|
| 2918 | 1 | 4658 | 5934 |
| 2919 | 1 | 4659 | 5791 |
| 2920 | 1 | 4659 | 5935 |
| 2921 | 1 | 4659 | 5943 |
| 2922 | 1 | 4659 | 5946 |
| 2923 | 1 | 4660 | 5796 |
| 2924 | 1 | 4660 | 5930 |
| 2925 | 1 | 4661 | 5929 |
| 2926 | 1 | 4661 | 5938 |
| 2927 | 1 | 4661 | 5941 |
| 2928 | 1 | 4661 | 6072 |
| 2929 | 1 | 4662 | 5797 |
| 2930 | 1 | 4662 | 5937 |
| 2931 | 1 | 4662 | 5940 |
| 2932 | 1 | 4662 | 5949 |
| 2933 | 1 | 4662 | 5952 |
| 2934 | 1 | 4662 | 6071 |
| 2935 | 1 | 4663 | 5790 |
| 2936 | 1 | 4663 | 5793 |
| 2937 | 1 | 4663 | 5802 |
| 2938 | 1 | 4663 | 5934 |
| 2939 | 1 | 4663 | 5942 |
| 2940 | 1 | 4663 | 5945 |
| 2941 | 1 | 4664 | 5933 |
| 2942 | 1 | 4664 | 5944 |
| 2943 | 1 | 4664 | 5947 |
| 2944 | 1 | 4664 | 6076 |
| 2945 | 1 | 4665 | 5803 |
| 2946 | 1 | 4665 | 5943 |
| 2947 | 1 | 4665 | 5946 |
| 2948 | 1 | 4665 | 5955 |
| 2949 | 1 | 4665 | 5958 |
| 2950 | 1 | 4665 | 6075 |
| 2951 | 1 | 4666 | 5787 |
| 2952 | 1 | 4666 | 5796 |
| 2953 | 1 | 4666 | 5808 |
| 2954 | 1 | 4666 | 5930 |
| 2955 | 1 | 4666 | 5939 |
| 2956 | 1 | 4666 | 5948 |
| 2957 | 1 | 4667 | 5938 |
| 2958 | 1 | 4667 | 5950 |
| 2959 | 1 | 4667 | 5953 |
| 2960 | 1 | 4667 | 6069 |
| 2961 | 1 | 4667 | 6072 |
| 2962 | 1 | 4667 | 6081 |
| 2963 | 1 | 4668 | 5809 |
| 2964 | 1 | 4668 | 5949 |
| 2965 | 1 | 4668 | 5952 |
| 2966 | 1 | 4668 | 5961 |
| 2967 | 1 | 4668 | 5964 |
| 2968 | 1 | 4668 | 6080 |

|      |   |      |      |
|------|---|------|------|
| 2969 | 1 | 4669 | 5802 |
| 2970 | 1 | 4669 | 5805 |
| 2971 | 1 | 4669 | 5814 |
| 2972 | 1 | 4669 | 5945 |
| 2973 | 1 | 4669 | 5954 |
| 2974 | 1 | 4669 | 5957 |
| 2975 | 1 | 4670 | 5944 |
| 2976 | 1 | 4670 | 5956 |
| 2977 | 1 | 4670 | 5959 |
| 2978 | 1 | 4670 | 6073 |
| 2979 | 1 | 4670 | 6076 |
| 2980 | 1 | 4670 | 6087 |
| 2981 | 1 | 4671 | 5815 |
| 2982 | 1 | 4671 | 5955 |
| 2983 | 1 | 4671 | 5958 |
| 2984 | 1 | 4671 | 5967 |
| 2985 | 1 | 4671 | 5970 |
| 2986 | 1 | 4671 | 6086 |
| 2987 | 1 | 4672 | 5799 |
| 2988 | 1 | 4672 | 5808 |
| 2989 | 1 | 4672 | 5820 |
| 2990 | 1 | 4672 | 5939 |
| 2991 | 1 | 4672 | 5951 |
| 2992 | 1 | 4672 | 5960 |
| 2993 | 1 | 4673 | 5950 |
| 2994 | 1 | 4673 | 5962 |
| 2995 | 1 | 4673 | 5965 |
| 2996 | 1 | 4673 | 6078 |
| 2997 | 1 | 4673 | 6081 |
| 2998 | 1 | 4673 | 6093 |
| 2999 | 1 | 4674 | 5821 |
| 3000 | 1 | 4674 | 5961 |
| 3001 | 1 | 4674 | 5964 |
| 3002 | 1 | 4674 | 5973 |
| 3003 | 1 | 4674 | 5976 |
| 3004 | 1 | 4674 | 6092 |
| 3005 | 1 | 4675 | 5814 |
| 3006 | 1 | 4675 | 5817 |
| 3007 | 1 | 4675 | 5826 |
| 3008 | 1 | 4675 | 5957 |
| 3009 | 1 | 4675 | 5966 |
| 3010 | 1 | 4675 | 5969 |
| 3011 | 1 | 4676 | 5956 |
| 3012 | 1 | 4676 | 5968 |
| 3013 | 1 | 4676 | 5971 |
| 3014 | 1 | 4676 | 6084 |
| 3015 | 1 | 4676 | 6087 |
| 3016 | 1 | 4676 | 6099 |
| 3017 | 1 | 4677 | 5827 |
| 3018 | 1 | 4677 | 5967 |
| 3019 | 1 | 4677 | 5970 |



|      |   |      |      |
|------|---|------|------|
| 3020 | 1 | 4677 | 5979 |
| 3021 | 1 | 4677 | 5982 |
| 3022 | 1 | 4677 | 6098 |
| 3023 | 1 | 4678 | 5811 |
| 3024 | 1 | 4678 | 5820 |
| 3025 | 1 | 4678 | 5832 |
| 3026 | 1 | 4678 | 5951 |
| 3027 | 1 | 4678 | 5963 |
| 3028 | 1 | 4678 | 5972 |
| 3029 | 1 | 4679 | 5962 |
| 3030 | 1 | 4679 | 5974 |
| 3031 | 1 | 4679 | 5977 |
| 3032 | 1 | 4679 | 6090 |
| 3033 | 1 | 4679 | 6093 |
| 3034 | 1 | 4679 | 6105 |
| 3035 | 1 | 4680 | 5833 |
| 3036 | 1 | 4680 | 5973 |
| 3037 | 1 | 4680 | 5976 |
| 3038 | 1 | 4680 | 5985 |
| 3039 | 1 | 4680 | 5988 |
| 3040 | 1 | 4680 | 6104 |
| 3041 | 1 | 4681 | 5826 |
| 3042 | 1 | 4681 | 5829 |
| 3043 | 1 | 4681 | 5838 |
| 3044 | 1 | 4681 | 5969 |
| 3045 | 1 | 4681 | 5978 |
| 3046 | 1 | 4681 | 5981 |
| 3047 | 1 | 4682 | 5968 |
| 3048 | 1 | 4682 | 5980 |
| 3049 | 1 | 4682 | 5983 |
| 3050 | 1 | 4682 | 6096 |
| 3051 | 1 | 4682 | 6099 |
| 3052 | 1 | 4682 | 6111 |
| 3053 | 1 | 4683 | 5839 |
| 3054 | 1 | 4683 | 5979 |
| 3055 | 1 | 4683 | 5982 |
| 3056 | 1 | 4683 | 5991 |
| 3057 | 1 | 4683 | 5994 |
| 3058 | 1 | 4683 | 6110 |
| 3059 | 1 | 4684 | 5823 |
| 3060 | 1 | 4684 | 5832 |
| 3061 | 1 | 4684 | 5844 |
| 3062 | 1 | 4684 | 5963 |
| 3063 | 1 | 4684 | 5975 |
| 3064 | 1 | 4684 | 5984 |
| 3065 | 1 | 4685 | 5974 |
| 3066 | 1 | 4685 | 5986 |
| 3067 | 1 | 4685 | 5989 |
| 3068 | 1 | 4685 | 6102 |
| 3069 | 1 | 4685 | 6105 |
| 3070 | 1 | 4685 | 6117 |

|      |   |      |      |
|------|---|------|------|
| 3071 | 1 | 4686 | 5845 |
| 3072 | 1 | 4686 | 5985 |
| 3073 | 1 | 4686 | 5988 |
| 3074 | 1 | 4686 | 5997 |
| 3075 | 1 | 4686 | 6000 |
| 3076 | 1 | 4686 | 6116 |
| 3077 | 1 | 4687 | 5838 |
| 3078 | 1 | 4687 | 5841 |
| 3079 | 1 | 4687 | 5850 |
| 3080 | 1 | 4687 | 5981 |
| 3081 | 1 | 4687 | 5990 |
| 3082 | 1 | 4687 | 5993 |
| 3083 | 1 | 4688 | 5980 |
| 3084 | 1 | 4688 | 5992 |
| 3085 | 1 | 4688 | 5995 |
| 3086 | 1 | 4688 | 6108 |
| 3087 | 1 | 4688 | 6111 |
| 3088 | 1 | 4688 | 6123 |
| 3089 | 1 | 4689 | 5851 |
| 3090 | 1 | 4689 | 5991 |
| 3091 | 1 | 4689 | 5994 |
| 3092 | 1 | 4689 | 6003 |
| 3093 | 1 | 4689 | 6006 |
| 3094 | 1 | 4689 | 6122 |
| 3095 | 1 | 4690 | 5835 |
| 3096 | 1 | 4690 | 5844 |
| 3097 | 1 | 4690 | 5856 |
| 3098 | 1 | 4690 | 5975 |
| 3099 | 1 | 4690 | 5987 |
| 3100 | 1 | 4690 | 5996 |
| 3101 | 1 | 4691 | 5986 |
| 3102 | 1 | 4691 | 5998 |
| 3103 | 1 | 4691 | 6001 |
| 3104 | 1 | 4691 | 6114 |
| 3105 | 1 | 4691 | 6117 |
| 3106 | 1 | 4691 | 6129 |
| 3107 | 1 | 4692 | 5857 |
| 3108 | 1 | 4692 | 5997 |
| 3109 | 1 | 4692 | 6000 |
| 3110 | 1 | 4692 | 6009 |
| 3111 | 1 | 4692 | 6012 |
| 3112 | 1 | 4692 | 6128 |
| 3113 | 1 | 4693 | 5850 |
| 3114 | 1 | 4693 | 5853 |
| 3115 | 1 | 4693 | 5862 |
| 3116 | 1 | 4693 | 5993 |
| 3117 | 1 | 4693 | 6002 |
| 3118 | 1 | 4693 | 6005 |
| 3119 | 1 | 4694 | 5992 |
| 3120 | 1 | 4694 | 6004 |
| 3121 | 1 | 4694 | 6007 |

|      |   |      |      |
|------|---|------|------|
| 3122 | 1 | 4694 | 6120 |
| 3123 | 1 | 4694 | 6123 |
| 3124 | 1 | 4694 | 6135 |
| 3125 | 1 | 4695 | 5863 |
| 3126 | 1 | 4695 | 6003 |
| 3127 | 1 | 4695 | 6006 |
| 3128 | 1 | 4695 | 6015 |
| 3129 | 1 | 4695 | 6018 |
| 3130 | 1 | 4695 | 6134 |
| 3131 | 1 | 4696 | 5847 |
| 3132 | 1 | 4696 | 5856 |
| 3133 | 1 | 4696 | 5868 |
| 3134 | 1 | 4696 | 5987 |
| 3135 | 1 | 4696 | 5999 |
| 3136 | 1 | 4696 | 6008 |
| 3137 | 1 | 4697 | 5998 |
| 3138 | 1 | 4697 | 6010 |
| 3139 | 1 | 4697 | 6013 |
| 3140 | 1 | 4697 | 6126 |
| 3141 | 1 | 4697 | 6129 |
| 3142 | 1 | 4697 | 6141 |
| 3143 | 1 | 4698 | 5869 |
| 3144 | 1 | 4698 | 6009 |
| 3145 | 1 | 4698 | 6012 |
| 3146 | 1 | 4698 | 6021 |
| 3147 | 1 | 4698 | 6024 |
| 3148 | 1 | 4698 | 6140 |
| 3149 | 1 | 4699 | 5862 |
| 3150 | 1 | 4699 | 5865 |
| 3151 | 1 | 4699 | 5874 |
| 3152 | 1 | 4699 | 6005 |
| 3153 | 1 | 4699 | 6014 |
| 3154 | 1 | 4699 | 6017 |
| 3155 | 1 | 4700 | 6004 |
| 3156 | 1 | 4700 | 6016 |
| 3157 | 1 | 4700 | 6019 |
| 3158 | 1 | 4700 | 6132 |
| 3159 | 1 | 4700 | 6135 |
| 3160 | 1 | 4700 | 6147 |
| 3161 | 1 | 4701 | 5875 |
| 3162 | 1 | 4701 | 6015 |
| 3163 | 1 | 4701 | 6018 |
| 3164 | 1 | 4701 | 6027 |
| 3165 | 1 | 4701 | 6030 |
| 3166 | 1 | 4701 | 6146 |
| 3167 | 1 | 4702 | 5859 |
| 3168 | 1 | 4702 | 5868 |
| 3169 | 1 | 4702 | 5880 |
| 3170 | 1 | 4702 | 5999 |
| 3171 | 1 | 4702 | 6011 |
| 3172 | 1 | 4702 | 6020 |

|      |   |      |      |
|------|---|------|------|
| 3173 | 1 | 4703 | 6010 |
| 3174 | 1 | 4703 | 6022 |
| 3175 | 1 | 4703 | 6025 |
| 3176 | 1 | 4703 | 6138 |
| 3177 | 1 | 4703 | 6141 |
| 3178 | 1 | 4703 | 6153 |
| 3179 | 1 | 4704 | 5881 |
| 3180 | 1 | 4704 | 6021 |
| 3181 | 1 | 4704 | 6024 |
| 3182 | 1 | 4704 | 6033 |
| 3183 | 1 | 4704 | 6036 |
| 3184 | 1 | 4704 | 6152 |
| 3185 | 1 | 4705 | 5874 |
| 3186 | 1 | 4705 | 5877 |
| 3187 | 1 | 4705 | 5886 |
| 3188 | 1 | 4705 | 6017 |
| 3189 | 1 | 4705 | 6026 |
| 3190 | 1 | 4705 | 6029 |
| 3191 | 1 | 4706 | 6016 |
| 3192 | 1 | 4706 | 6028 |
| 3193 | 1 | 4706 | 6031 |
| 3194 | 1 | 4706 | 6144 |
| 3195 | 1 | 4706 | 6147 |
| 3196 | 1 | 4706 | 6159 |
| 3197 | 1 | 4707 | 5887 |
| 3198 | 1 | 4707 | 6027 |
| 3199 | 1 | 4707 | 6030 |
| 3200 | 1 | 4707 | 6039 |
| 3201 | 1 | 4707 | 6042 |
| 3202 | 1 | 4707 | 6158 |
| 3203 | 1 | 4708 | 5871 |
| 3204 | 1 | 4708 | 5880 |
| 3205 | 1 | 4708 | 5892 |
| 3206 | 1 | 4708 | 6011 |
| 3207 | 1 | 4708 | 6023 |
| 3208 | 1 | 4708 | 6032 |
| 3209 | 1 | 4709 | 6022 |
| 3210 | 1 | 4709 | 6034 |
| 3211 | 1 | 4709 | 6037 |
| 3212 | 1 | 4709 | 6150 |
| 3213 | 1 | 4709 | 6153 |
| 3214 | 1 | 4709 | 6165 |
| 3215 | 1 | 4710 | 5893 |
| 3216 | 1 | 4710 | 6033 |
| 3217 | 1 | 4710 | 6036 |
| 3218 | 1 | 4710 | 6045 |
| 3219 | 1 | 4710 | 6048 |
| 3220 | 1 | 4710 | 6164 |
| 3221 | 1 | 4711 | 5886 |
| 3222 | 1 | 4711 | 5889 |
| 3223 | 1 | 4711 | 5898 |

|      |   |      |      |
|------|---|------|------|
| 3224 | 1 | 4711 | 6029 |
| 3225 | 1 | 4711 | 6038 |
| 3226 | 1 | 4711 | 6041 |
| 3227 | 1 | 4712 | 6028 |
| 3228 | 1 | 4712 | 6040 |
| 3229 | 1 | 4712 | 6043 |
| 3230 | 1 | 4712 | 6156 |
| 3231 | 1 | 4712 | 6159 |
| 3232 | 1 | 4712 | 6171 |
| 3233 | 1 | 4713 | 5899 |
| 3234 | 1 | 4713 | 6039 |
| 3235 | 1 | 4713 | 6042 |
| 3236 | 1 | 4713 | 6051 |
| 3237 | 1 | 4713 | 6054 |
| 3238 | 1 | 4713 | 6170 |
| 3239 | 1 | 4714 | 5883 |
| 3240 | 1 | 4714 | 5892 |
| 3241 | 1 | 4714 | 5904 |
| 3242 | 1 | 4714 | 6023 |
| 3243 | 1 | 4714 | 6035 |
| 3244 | 1 | 4714 | 6044 |
| 3245 | 1 | 4715 | 6034 |
| 3246 | 1 | 4715 | 6046 |
| 3247 | 1 | 4715 | 6049 |
| 3248 | 1 | 4715 | 6162 |
| 3249 | 1 | 4715 | 6165 |
| 3250 | 1 | 4715 | 6177 |
| 3251 | 1 | 4716 | 5905 |
| 3252 | 1 | 4716 | 6045 |
| 3253 | 1 | 4716 | 6048 |
| 3254 | 1 | 4716 | 6057 |
| 3255 | 1 | 4716 | 6060 |
| 3256 | 1 | 4716 | 6176 |
| 3257 | 1 | 4717 | 5898 |
| 3258 | 1 | 4717 | 5901 |
| 3259 | 1 | 4717 | 5910 |
| 3260 | 1 | 4717 | 6041 |
| 3261 | 1 | 4717 | 6050 |
| 3262 | 1 | 4717 | 6053 |
| 3263 | 1 | 4718 | 6040 |
| 3264 | 1 | 4718 | 6052 |
| 3265 | 1 | 4718 | 6055 |
| 3266 | 1 | 4718 | 6168 |
| 3267 | 1 | 4718 | 6171 |
| 3268 | 1 | 4718 | 6183 |
| 3269 | 1 | 4719 | 5911 |
| 3270 | 1 | 4719 | 6051 |
| 3271 | 1 | 4719 | 6054 |
| 3272 | 1 | 4719 | 6063 |
| 3273 | 1 | 4719 | 6066 |
| 3274 | 1 | 4719 | 6182 |

|      |   |      |      |
|------|---|------|------|
| 3275 | 1 | 4720 | 5895 |
| 3276 | 1 | 4720 | 5904 |
| 3277 | 1 | 4720 | 5916 |
| 3278 | 1 | 4720 | 6035 |
| 3279 | 1 | 4720 | 6047 |
| 3280 | 1 | 4720 | 6056 |
| 3281 | 1 | 4721 | 6046 |
| 3282 | 1 | 4721 | 6058 |
| 3283 | 1 | 4721 | 6061 |
| 3284 | 1 | 4721 | 6174 |
| 3285 | 1 | 4721 | 6177 |
| 3286 | 1 | 4722 | 5917 |
| 3287 | 1 | 4722 | 6057 |
| 3288 | 1 | 4722 | 6060 |
| 3289 | 1 | 4723 | 5910 |
| 3290 | 1 | 4723 | 5913 |
| 3291 | 1 | 4723 | 5922 |
| 3292 | 1 | 4723 | 6053 |
| 3293 | 1 | 4723 | 6062 |
| 3294 | 1 | 4723 | 6065 |
| 3295 | 1 | 4724 | 6052 |
| 3296 | 1 | 4724 | 6064 |
| 3297 | 1 | 4724 | 6067 |
| 3298 | 1 | 4724 | 6180 |
| 3299 | 1 | 4724 | 6183 |
| 3300 | 1 | 4725 | 5923 |
| 3301 | 1 | 4725 | 6063 |
| 3302 | 1 | 4725 | 6066 |
| 3303 | 1 | 4726 | 5907 |
| 3304 | 1 | 4726 | 5916 |
| 3305 | 1 | 4726 | 5928 |
| 3306 | 1 | 4726 | 6047 |
| 3307 | 1 | 4726 | 6059 |
| 3308 | 1 | 4726 | 6068 |
| 3309 | 1 | 4727 | 5949 |
| 3310 | 1 | 4727 | 6071 |
| 3311 | 1 | 4727 | 6077 |
| 3312 | 1 | 4727 | 6080 |
| 3313 | 1 | 4728 | 5942 |
| 3314 | 1 | 4728 | 5945 |
| 3315 | 1 | 4728 | 5954 |
| 3316 | 1 | 4728 | 6074 |
| 3317 | 1 | 4729 | 5955 |
| 3318 | 1 | 4729 | 6075 |
| 3319 | 1 | 4729 | 6083 |
| 3320 | 1 | 4729 | 6086 |
| 3321 | 1 | 4730 | 5939 |
| 3322 | 1 | 4730 | 5948 |
| 3323 | 1 | 4730 | 5960 |
| 3324 | 1 | 4730 | 6070 |
| 3325 | 1 | 4731 | 6069 |

|      |   |      |      |
|------|---|------|------|
| 3326 | 1 | 4731 | 6078 |
| 3327 | 1 | 4731 | 6081 |
| 3328 | 1 | 4731 | 6188 |
| 3329 | 1 | 4732 | 5961 |
| 3330 | 1 | 4732 | 6077 |
| 3331 | 1 | 4732 | 6080 |
| 3332 | 1 | 4732 | 6089 |
| 3333 | 1 | 4732 | 6092 |
| 3334 | 1 | 4732 | 6187 |
| 3335 | 1 | 4733 | 5954 |
| 3336 | 1 | 4733 | 5957 |
| 3337 | 1 | 4733 | 5966 |
| 3338 | 1 | 4733 | 6074 |
| 3339 | 1 | 4733 | 6082 |
| 3340 | 1 | 4733 | 6085 |
| 3341 | 1 | 4734 | 6073 |
| 3342 | 1 | 4734 | 6084 |
| 3343 | 1 | 4734 | 6087 |
| 3344 | 1 | 4734 | 6192 |
| 3345 | 1 | 4735 | 5967 |
| 3346 | 1 | 4735 | 6083 |
| 3347 | 1 | 4735 | 6086 |
| 3348 | 1 | 4735 | 6095 |
| 3349 | 1 | 4735 | 6098 |
| 3350 | 1 | 4735 | 6191 |
| 3351 | 1 | 4736 | 5951 |
| 3352 | 1 | 4736 | 5960 |
| 3353 | 1 | 4736 | 5972 |
| 3354 | 1 | 4736 | 6070 |
| 3355 | 1 | 4736 | 6079 |
| 3356 | 1 | 4736 | 6088 |
| 3357 | 1 | 4737 | 6078 |
| 3358 | 1 | 4737 | 6090 |
| 3359 | 1 | 4737 | 6093 |
| 3360 | 1 | 4737 | 6185 |
| 3361 | 1 | 4737 | 6188 |
| 3362 | 1 | 4737 | 6197 |
| 3363 | 1 | 4738 | 5973 |
| 3364 | 1 | 4738 | 6089 |
| 3365 | 1 | 4738 | 6092 |
| 3366 | 1 | 4738 | 6101 |
| 3367 | 1 | 4738 | 6104 |
| 3368 | 1 | 4738 | 6196 |
| 3369 | 1 | 4739 | 5966 |
| 3370 | 1 | 4739 | 5969 |
| 3371 | 1 | 4739 | 5978 |
| 3372 | 1 | 4739 | 6085 |
| 3373 | 1 | 4739 | 6094 |
| 3374 | 1 | 4739 | 6097 |
| 3375 | 1 | 4740 | 6084 |
| 3376 | 1 | 4740 | 6096 |

|      |   |      |      |
|------|---|------|------|
| 3377 | 1 | 4740 | 6099 |
| 3378 | 1 | 4740 | 6189 |
| 3379 | 1 | 4740 | 6192 |
| 3380 | 1 | 4740 | 6203 |
| 3381 | 1 | 4741 | 5979 |
| 3382 | 1 | 4741 | 6095 |
| 3383 | 1 | 4741 | 6098 |
| 3384 | 1 | 4741 | 6107 |
| 3385 | 1 | 4741 | 6110 |
| 3386 | 1 | 4741 | 6202 |
| 3387 | 1 | 4742 | 5963 |
| 3388 | 1 | 4742 | 5972 |
| 3389 | 1 | 4742 | 5984 |
| 3390 | 1 | 4742 | 6079 |
| 3391 | 1 | 4742 | 6091 |
| 3392 | 1 | 4742 | 6100 |
| 3393 | 1 | 4743 | 6090 |
| 3394 | 1 | 4743 | 6102 |
| 3395 | 1 | 4743 | 6105 |
| 3396 | 1 | 4743 | 6194 |
| 3397 | 1 | 4743 | 6197 |
| 3398 | 1 | 4743 | 6209 |
| 3399 | 1 | 4744 | 5985 |
| 3400 | 1 | 4744 | 6101 |
| 3401 | 1 | 4744 | 6104 |
| 3402 | 1 | 4744 | 6113 |
| 3403 | 1 | 4744 | 6116 |
| 3404 | 1 | 4744 | 6208 |
| 3405 | 1 | 4745 | 5978 |
| 3406 | 1 | 4745 | 5981 |
| 3407 | 1 | 4745 | 5990 |
| 3408 | 1 | 4745 | 6097 |
| 3409 | 1 | 4745 | 6106 |
| 3410 | 1 | 4745 | 6109 |
| 3411 | 1 | 4746 | 6096 |
| 3412 | 1 | 4746 | 6108 |
| 3413 | 1 | 4746 | 6111 |
| 3414 | 1 | 4746 | 6200 |
| 3415 | 1 | 4746 | 6203 |
| 3416 | 1 | 4746 | 6215 |
| 3417 | 1 | 4747 | 5991 |
| 3418 | 1 | 4747 | 6107 |
| 3419 | 1 | 4747 | 6110 |
| 3420 | 1 | 4747 | 6119 |
| 3421 | 1 | 4747 | 6122 |
| 3422 | 1 | 4747 | 6214 |
| 3423 | 1 | 4748 | 5975 |
| 3424 | 1 | 4748 | 5984 |
| 3425 | 1 | 4748 | 5996 |
| 3426 | 1 | 4748 | 6091 |
| 3427 | 1 | 4748 | 6103 |



|      |   |      |      |
|------|---|------|------|
| 3428 | 1 | 4748 | 6112 |
| 3429 | 1 | 4749 | 6102 |
| 3430 | 1 | 4749 | 6114 |
| 3431 | 1 | 4749 | 6117 |
| 3432 | 1 | 4749 | 6206 |
| 3433 | 1 | 4749 | 6209 |
| 3434 | 1 | 4749 | 6221 |
| 3435 | 1 | 4750 | 5997 |
| 3436 | 1 | 4750 | 6113 |
| 3437 | 1 | 4750 | 6116 |
| 3438 | 1 | 4750 | 6125 |
| 3439 | 1 | 4750 | 6128 |
| 3440 | 1 | 4750 | 6220 |
| 3441 | 1 | 4751 | 5990 |
| 3442 | 1 | 4751 | 5993 |
| 3443 | 1 | 4751 | 6002 |
| 3444 | 1 | 4751 | 6109 |
| 3445 | 1 | 4751 | 6118 |
| 3446 | 1 | 4751 | 6121 |
| 3447 | 1 | 4752 | 6108 |
| 3448 | 1 | 4752 | 6120 |
| 3449 | 1 | 4752 | 6123 |
| 3450 | 1 | 4752 | 6212 |
| 3451 | 1 | 4752 | 6215 |
| 3452 | 1 | 4752 | 6227 |
| 3453 | 1 | 4753 | 6003 |
| 3454 | 1 | 4753 | 6119 |
| 3455 | 1 | 4753 | 6122 |
| 3456 | 1 | 4753 | 6131 |
| 3457 | 1 | 4753 | 6134 |
| 3458 | 1 | 4753 | 6226 |
| 3459 | 1 | 4754 | 5987 |
| 3460 | 1 | 4754 | 5996 |
| 3461 | 1 | 4754 | 6008 |
| 3462 | 1 | 4754 | 6103 |
| 3463 | 1 | 4754 | 6115 |
| 3464 | 1 | 4754 | 6124 |
| 3465 | 1 | 4755 | 6114 |
| 3466 | 1 | 4755 | 6126 |
| 3467 | 1 | 4755 | 6129 |
| 3468 | 1 | 4755 | 6218 |
| 3469 | 1 | 4755 | 6221 |
| 3470 | 1 | 4755 | 6233 |
| 3471 | 1 | 4756 | 6009 |
| 3472 | 1 | 4756 | 6125 |
| 3473 | 1 | 4756 | 6128 |
| 3474 | 1 | 4756 | 6137 |
| 3475 | 1 | 4756 | 6140 |
| 3476 | 1 | 4756 | 6232 |
| 3477 | 1 | 4757 | 6002 |
| 3478 | 1 | 4757 | 6005 |

|      |   |      |      |
|------|---|------|------|
| 3479 | 1 | 4757 | 6014 |
| 3480 | 1 | 4757 | 6121 |
| 3481 | 1 | 4757 | 6130 |
| 3482 | 1 | 4757 | 6133 |
| 3483 | 1 | 4758 | 6120 |
| 3484 | 1 | 4758 | 6132 |
| 3485 | 1 | 4758 | 6135 |
| 3486 | 1 | 4758 | 6224 |
| 3487 | 1 | 4758 | 6227 |
| 3488 | 1 | 4758 | 6239 |
| 3489 | 1 | 4759 | 6015 |
| 3490 | 1 | 4759 | 6131 |
| 3491 | 1 | 4759 | 6134 |
| 3492 | 1 | 4759 | 6143 |
| 3493 | 1 | 4759 | 6146 |
| 3494 | 1 | 4759 | 6238 |
| 3495 | 1 | 4760 | 5999 |
| 3496 | 1 | 4760 | 6008 |
| 3497 | 1 | 4760 | 6020 |
| 3498 | 1 | 4760 | 6115 |
| 3499 | 1 | 4760 | 6127 |
| 3500 | 1 | 4760 | 6136 |
| 3501 | 1 | 4761 | 6126 |
| 3502 | 1 | 4761 | 6138 |
| 3503 | 1 | 4761 | 6141 |
| 3504 | 1 | 4761 | 6230 |
| 3505 | 1 | 4761 | 6233 |
| 3506 | 1 | 4761 | 6245 |
| 3507 | 1 | 4762 | 6021 |
| 3508 | 1 | 4762 | 6137 |
| 3509 | 1 | 4762 | 6140 |
| 3510 | 1 | 4762 | 6149 |
| 3511 | 1 | 4762 | 6152 |
| 3512 | 1 | 4762 | 6244 |
| 3513 | 1 | 4763 | 6014 |
| 3514 | 1 | 4763 | 6017 |
| 3515 | 1 | 4763 | 6026 |
| 3516 | 1 | 4763 | 6133 |
| 3517 | 1 | 4763 | 6142 |
| 3518 | 1 | 4763 | 6145 |
| 3519 | 1 | 4764 | 6132 |
| 3520 | 1 | 4764 | 6144 |
| 3521 | 1 | 4764 | 6147 |
| 3522 | 1 | 4764 | 6236 |
| 3523 | 1 | 4764 | 6239 |
| 3524 | 1 | 4764 | 6251 |
| 3525 | 1 | 4765 | 6027 |
| 3526 | 1 | 4765 | 6143 |
| 3527 | 1 | 4765 | 6146 |
| 3528 | 1 | 4765 | 6155 |
| 3529 | 1 | 4765 | 6158 |

|      |   |      |      |
|------|---|------|------|
| 3530 | 1 | 4765 | 6250 |
| 3531 | 1 | 4766 | 6011 |
| 3532 | 1 | 4766 | 6020 |
| 3533 | 1 | 4766 | 6032 |
| 3534 | 1 | 4766 | 6127 |
| 3535 | 1 | 4766 | 6139 |
| 3536 | 1 | 4766 | 6148 |
| 3537 | 1 | 4767 | 6138 |
| 3538 | 1 | 4767 | 6150 |
| 3539 | 1 | 4767 | 6153 |
| 3540 | 1 | 4767 | 6242 |
| 3541 | 1 | 4767 | 6245 |
| 3542 | 1 | 4767 | 6257 |
| 3543 | 1 | 4768 | 6033 |
| 3544 | 1 | 4768 | 6149 |
| 3545 | 1 | 4768 | 6152 |
| 3546 | 1 | 4768 | 6161 |
| 3547 | 1 | 4768 | 6164 |
| 3548 | 1 | 4768 | 6256 |
| 3549 | 1 | 4769 | 6026 |
| 3550 | 1 | 4769 | 6029 |
| 3551 | 1 | 4769 | 6038 |
| 3552 | 1 | 4769 | 6145 |
| 3553 | 1 | 4769 | 6154 |
| 3554 | 1 | 4769 | 6157 |
| 3555 | 1 | 4770 | 6144 |
| 3556 | 1 | 4770 | 6156 |
| 3557 | 1 | 4770 | 6159 |
| 3558 | 1 | 4770 | 6248 |
| 3559 | 1 | 4770 | 6251 |
| 3560 | 1 | 4770 | 6263 |
| 3561 | 1 | 4771 | 6039 |
| 3562 | 1 | 4771 | 6155 |
| 3563 | 1 | 4771 | 6158 |
| 3564 | 1 | 4771 | 6167 |
| 3565 | 1 | 4771 | 6170 |
| 3566 | 1 | 4771 | 6262 |
| 3567 | 1 | 4772 | 6023 |
| 3568 | 1 | 4772 | 6032 |
| 3569 | 1 | 4772 | 6044 |
| 3570 | 1 | 4772 | 6139 |
| 3571 | 1 | 4772 | 6151 |
| 3572 | 1 | 4772 | 6160 |
| 3573 | 1 | 4773 | 6150 |
| 3574 | 1 | 4773 | 6162 |
| 3575 | 1 | 4773 | 6165 |
| 3576 | 1 | 4773 | 6254 |
| 3577 | 1 | 4773 | 6257 |
| 3578 | 1 | 4773 | 6269 |
| 3579 | 1 | 4774 | 6045 |
| 3580 | 1 | 4774 | 6161 |

|      |   |      |      |
|------|---|------|------|
| 3581 | 1 | 4774 | 6164 |
| 3582 | 1 | 4774 | 6173 |
| 3583 | 1 | 4774 | 6176 |
| 3584 | 1 | 4774 | 6268 |
| 3585 | 1 | 4775 | 6038 |
| 3586 | 1 | 4775 | 6041 |
| 3587 | 1 | 4775 | 6050 |
| 3588 | 1 | 4775 | 6157 |
| 3589 | 1 | 4775 | 6166 |
| 3590 | 1 | 4775 | 6169 |
| 3591 | 1 | 4776 | 6156 |
| 3592 | 1 | 4776 | 6168 |
| 3593 | 1 | 4776 | 6171 |
| 3594 | 1 | 4776 | 6260 |
| 3595 | 1 | 4776 | 6263 |
| 3596 | 1 | 4776 | 6275 |
| 3597 | 1 | 4777 | 6051 |
| 3598 | 1 | 4777 | 6167 |
| 3599 | 1 | 4777 | 6170 |
| 3600 | 1 | 4777 | 6179 |
| 3601 | 1 | 4777 | 6182 |
| 3602 | 1 | 4777 | 6274 |
| 3603 | 1 | 4778 | 6035 |
| 3604 | 1 | 4778 | 6044 |
| 3605 | 1 | 4778 | 6056 |
| 3606 | 1 | 4778 | 6151 |
| 3607 | 1 | 4778 | 6163 |
| 3608 | 1 | 4778 | 6172 |
| 3609 | 1 | 4779 | 6162 |
| 3610 | 1 | 4779 | 6174 |
| 3611 | 1 | 4779 | 6177 |
| 3612 | 1 | 4779 | 6266 |
| 3613 | 1 | 4779 | 6269 |
| 3614 | 1 | 4780 | 6057 |
| 3615 | 1 | 4780 | 6173 |
| 3616 | 1 | 4780 | 6176 |
| 3617 | 1 | 4781 | 6050 |
| 3618 | 1 | 4781 | 6053 |
| 3619 | 1 | 4781 | 6062 |
| 3620 | 1 | 4781 | 6169 |
| 3621 | 1 | 4781 | 6178 |
| 3622 | 1 | 4781 | 6181 |
| 3623 | 1 | 4782 | 6168 |
| 3624 | 1 | 4782 | 6180 |
| 3625 | 1 | 4782 | 6183 |
| 3626 | 1 | 4782 | 6272 |
| 3627 | 1 | 4782 | 6275 |
| 3628 | 1 | 4783 | 6063 |
| 3629 | 1 | 4783 | 6179 |
| 3630 | 1 | 4783 | 6182 |
| 3631 | 1 | 4784 | 6047 |

|      |   |      |      |
|------|---|------|------|
| 3632 | 1 | 4784 | 6056 |
| 3633 | 1 | 4784 | 6068 |
| 3634 | 1 | 4784 | 6163 |
| 3635 | 1 | 4784 | 6175 |
| 3636 | 1 | 4784 | 6184 |
| 3637 | 1 | 4785 | 6089 |
| 3638 | 1 | 4785 | 6187 |
| 3639 | 1 | 4785 | 6193 |
| 3640 | 1 | 4785 | 6196 |
| 3641 | 1 | 4786 | 6082 |
| 3642 | 1 | 4786 | 6085 |
| 3643 | 1 | 4786 | 6094 |
| 3644 | 1 | 4786 | 6190 |
| 3645 | 1 | 4787 | 6095 |
| 3646 | 1 | 4787 | 6191 |
| 3647 | 1 | 4787 | 6199 |
| 3648 | 1 | 4787 | 6202 |
| 3649 | 1 | 4788 | 6079 |
| 3650 | 1 | 4788 | 6088 |
| 3651 | 1 | 4788 | 6100 |
| 3652 | 1 | 4788 | 6186 |
| 3653 | 1 | 4789 | 6185 |
| 3654 | 1 | 4789 | 6194 |
| 3655 | 1 | 4789 | 6197 |
| 3656 | 1 | 4789 | 6280 |
| 3657 | 1 | 4790 | 6101 |
| 3658 | 1 | 4790 | 6193 |
| 3659 | 1 | 4790 | 6196 |
| 3660 | 1 | 4790 | 6205 |
| 3661 | 1 | 4790 | 6208 |
| 3662 | 1 | 4790 | 6279 |
| 3663 | 1 | 4791 | 6094 |
| 3664 | 1 | 4791 | 6097 |
| 3665 | 1 | 4791 | 6106 |
| 3666 | 1 | 4791 | 6190 |
| 3667 | 1 | 4791 | 6198 |
| 3668 | 1 | 4791 | 6201 |
| 3669 | 1 | 4792 | 6189 |
| 3670 | 1 | 4792 | 6200 |
| 3671 | 1 | 4792 | 6203 |
| 3672 | 1 | 4792 | 6284 |
| 3673 | 1 | 4793 | 6107 |
| 3674 | 1 | 4793 | 6199 |
| 3675 | 1 | 4793 | 6202 |
| 3676 | 1 | 4793 | 6211 |
| 3677 | 1 | 4793 | 6214 |
| 3678 | 1 | 4793 | 6283 |
| 3679 | 1 | 4794 | 6091 |
| 3680 | 1 | 4794 | 6100 |
| 3681 | 1 | 4794 | 6112 |
| 3682 | 1 | 4794 | 6186 |

|      |   |      |      |
|------|---|------|------|
| 3683 | 1 | 4794 | 6195 |
| 3684 | 1 | 4794 | 6204 |
| 3685 | 1 | 4795 | 6194 |
| 3686 | 1 | 4795 | 6206 |
| 3687 | 1 | 4795 | 6209 |
| 3688 | 1 | 4795 | 6277 |
| 3689 | 1 | 4795 | 6280 |
| 3690 | 1 | 4795 | 6289 |
| 3691 | 1 | 4796 | 6113 |
| 3692 | 1 | 4796 | 6205 |
| 3693 | 1 | 4796 | 6208 |
| 3694 | 1 | 4796 | 6217 |
| 3695 | 1 | 4796 | 6220 |
| 3696 | 1 | 4796 | 6288 |
| 3697 | 1 | 4797 | 6106 |
| 3698 | 1 | 4797 | 6109 |
| 3699 | 1 | 4797 | 6118 |
| 3700 | 1 | 4797 | 6201 |
| 3701 | 1 | 4797 | 6210 |
| 3702 | 1 | 4797 | 6213 |
| 3703 | 1 | 4798 | 6200 |
| 3704 | 1 | 4798 | 6212 |
| 3705 | 1 | 4798 | 6215 |
| 3706 | 1 | 4798 | 6281 |
| 3707 | 1 | 4798 | 6284 |
| 3708 | 1 | 4798 | 6295 |
| 3709 | 1 | 4799 | 6119 |
| 3710 | 1 | 4799 | 6211 |
| 3711 | 1 | 4799 | 6214 |
| 3712 | 1 | 4799 | 6223 |
| 3713 | 1 | 4799 | 6226 |
| 3714 | 1 | 4799 | 6294 |
| 3715 | 1 | 4800 | 6103 |
| 3716 | 1 | 4800 | 6112 |
| 3717 | 1 | 4800 | 6124 |
| 3718 | 1 | 4800 | 6195 |
| 3719 | 1 | 4800 | 6207 |
| 3720 | 1 | 4800 | 6216 |
| 3721 | 1 | 4801 | 6206 |
| 3722 | 1 | 4801 | 6218 |
| 3723 | 1 | 4801 | 6221 |
| 3724 | 1 | 4801 | 6286 |
| 3725 | 1 | 4801 | 6289 |
| 3726 | 1 | 4801 | 6301 |
| 3727 | 1 | 4802 | 6125 |
| 3728 | 1 | 4802 | 6217 |
| 3729 | 1 | 4802 | 6220 |
| 3730 | 1 | 4802 | 6229 |
| 3731 | 1 | 4802 | 6232 |
| 3732 | 1 | 4802 | 6300 |
| 3733 | 1 | 4803 | 6118 |

|      |   |      |      |
|------|---|------|------|
| 3734 | 1 | 4803 | 6121 |
| 3735 | 1 | 4803 | 6130 |
| 3736 | 1 | 4803 | 6213 |
| 3737 | 1 | 4803 | 6222 |
| 3738 | 1 | 4803 | 6225 |
| 3739 | 1 | 4804 | 6212 |
| 3740 | 1 | 4804 | 6224 |
| 3741 | 1 | 4804 | 6227 |
| 3742 | 1 | 4804 | 6292 |
| 3743 | 1 | 4804 | 6295 |
| 3744 | 1 | 4804 | 6307 |
| 3745 | 1 | 4805 | 6131 |
| 3746 | 1 | 4805 | 6223 |
| 3747 | 1 | 4805 | 6226 |
| 3748 | 1 | 4805 | 6235 |
| 3749 | 1 | 4805 | 6238 |
| 3750 | 1 | 4805 | 6306 |
| 3751 | 1 | 4806 | 6115 |
| 3752 | 1 | 4806 | 6124 |
| 3753 | 1 | 4806 | 6136 |
| 3754 | 1 | 4806 | 6207 |
| 3755 | 1 | 4806 | 6219 |
| 3756 | 1 | 4806 | 6228 |
| 3757 | 1 | 4807 | 6218 |
| 3758 | 1 | 4807 | 6230 |
| 3759 | 1 | 4807 | 6233 |
| 3760 | 1 | 4807 | 6298 |
| 3761 | 1 | 4807 | 6301 |
| 3762 | 1 | 4807 | 6313 |
| 3763 | 1 | 4808 | 6137 |
| 3764 | 1 | 4808 | 6229 |
| 3765 | 1 | 4808 | 6232 |
| 3766 | 1 | 4808 | 6241 |
| 3767 | 1 | 4808 | 6244 |
| 3768 | 1 | 4808 | 6312 |
| 3769 | 1 | 4809 | 6130 |
| 3770 | 1 | 4809 | 6133 |
| 3771 | 1 | 4809 | 6142 |
| 3772 | 1 | 4809 | 6225 |
| 3773 | 1 | 4809 | 6234 |
| 3774 | 1 | 4809 | 6237 |
| 3775 | 1 | 4810 | 6224 |
| 3776 | 1 | 4810 | 6236 |
| 3777 | 1 | 4810 | 6239 |
| 3778 | 1 | 4810 | 6304 |
| 3779 | 1 | 4810 | 6307 |
| 3780 | 1 | 4810 | 6319 |
| 3781 | 1 | 4811 | 6143 |
| 3782 | 1 | 4811 | 6235 |
| 3783 | 1 | 4811 | 6238 |
| 3784 | 1 | 4811 | 6247 |

|      |   |      |      |
|------|---|------|------|
| 3785 | 1 | 4811 | 6250 |
| 3786 | 1 | 4811 | 6318 |
| 3787 | 1 | 4812 | 6127 |
| 3788 | 1 | 4812 | 6136 |
| 3789 | 1 | 4812 | 6148 |
| 3790 | 1 | 4812 | 6219 |
| 3791 | 1 | 4812 | 6231 |
| 3792 | 1 | 4812 | 6240 |
| 3793 | 1 | 4813 | 6230 |
| 3794 | 1 | 4813 | 6242 |
| 3795 | 1 | 4813 | 6245 |
| 3796 | 1 | 4813 | 6310 |
| 3797 | 1 | 4813 | 6313 |
| 3798 | 1 | 4813 | 6325 |
| 3799 | 1 | 4814 | 6149 |
| 3800 | 1 | 4814 | 6241 |
| 3801 | 1 | 4814 | 6244 |
| 3802 | 1 | 4814 | 6253 |
| 3803 | 1 | 4814 | 6256 |
| 3804 | 1 | 4814 | 6324 |
| 3805 | 1 | 4815 | 6142 |
| 3806 | 1 | 4815 | 6145 |
| 3807 | 1 | 4815 | 6154 |
| 3808 | 1 | 4815 | 6237 |
| 3809 | 1 | 4815 | 6246 |
| 3810 | 1 | 4815 | 6249 |
| 3811 | 1 | 4816 | 6236 |
| 3812 | 1 | 4816 | 6248 |
| 3813 | 1 | 4816 | 6251 |
| 3814 | 1 | 4816 | 6316 |
| 3815 | 1 | 4816 | 6319 |
| 3816 | 1 | 4816 | 6331 |
| 3817 | 1 | 4817 | 6155 |
| 3818 | 1 | 4817 | 6247 |
| 3819 | 1 | 4817 | 6250 |
| 3820 | 1 | 4817 | 6259 |
| 3821 | 1 | 4817 | 6262 |
| 3822 | 1 | 4817 | 6330 |
| 3823 | 1 | 4818 | 6139 |
| 3824 | 1 | 4818 | 6148 |
| 3825 | 1 | 4818 | 6160 |
| 3826 | 1 | 4818 | 6231 |
| 3827 | 1 | 4818 | 6243 |
| 3828 | 1 | 4818 | 6252 |
| 3829 | 1 | 4819 | 6242 |
| 3830 | 1 | 4819 | 6254 |
| 3831 | 1 | 4819 | 6257 |
| 3832 | 1 | 4819 | 6322 |
| 3833 | 1 | 4819 | 6325 |
| 3834 | 1 | 4819 | 6337 |
| 3835 | 1 | 4820 | 6161 |



|      |   |      |      |
|------|---|------|------|
| 3836 | 1 | 4820 | 6253 |
| 3837 | 1 | 4820 | 6256 |
| 3838 | 1 | 4820 | 6265 |
| 3839 | 1 | 4820 | 6268 |
| 3840 | 1 | 4820 | 6336 |
| 3841 | 1 | 4821 | 6154 |
| 3842 | 1 | 4821 | 6157 |
| 3843 | 1 | 4821 | 6166 |
| 3844 | 1 | 4821 | 6249 |
| 3845 | 1 | 4821 | 6258 |
| 3846 | 1 | 4821 | 6261 |
| 3847 | 1 | 4822 | 6248 |
| 3848 | 1 | 4822 | 6260 |
| 3849 | 1 | 4822 | 6263 |
| 3850 | 1 | 4822 | 6328 |
| 3851 | 1 | 4822 | 6331 |
| 3852 | 1 | 4822 | 6343 |
| 3853 | 1 | 4823 | 6167 |
| 3854 | 1 | 4823 | 6259 |
| 3855 | 1 | 4823 | 6262 |
| 3856 | 1 | 4823 | 6271 |
| 3857 | 1 | 4823 | 6274 |
| 3858 | 1 | 4823 | 6342 |
| 3859 | 1 | 4824 | 6151 |
| 3860 | 1 | 4824 | 6160 |
| 3861 | 1 | 4824 | 6172 |
| 3862 | 1 | 4824 | 6243 |
| 3863 | 1 | 4824 | 6255 |
| 3864 | 1 | 4824 | 6264 |
| 3865 | 1 | 4825 | 6254 |
| 3866 | 1 | 4825 | 6266 |
| 3867 | 1 | 4825 | 6269 |
| 3868 | 1 | 4825 | 6334 |
| 3869 | 1 | 4825 | 6337 |
| 3870 | 1 | 4826 | 6173 |
| 3871 | 1 | 4826 | 6265 |
| 3872 | 1 | 4826 | 6268 |
| 3873 | 1 | 4827 | 6166 |
| 3874 | 1 | 4827 | 6169 |
| 3875 | 1 | 4827 | 6178 |
| 3876 | 1 | 4827 | 6261 |
| 3877 | 1 | 4827 | 6270 |
| 3878 | 1 | 4827 | 6273 |
| 3879 | 1 | 4828 | 6260 |
| 3880 | 1 | 4828 | 6272 |
| 3881 | 1 | 4828 | 6275 |
| 3882 | 1 | 4828 | 6340 |
| 3883 | 1 | 4828 | 6343 |
| 3884 | 1 | 4829 | 6179 |
| 3885 | 1 | 4829 | 6271 |
| 3886 | 1 | 4829 | 6274 |

|      |   |      |      |
|------|---|------|------|
| 3887 | 1 | 4830 | 6163 |
| 3888 | 1 | 4830 | 6172 |
| 3889 | 1 | 4830 | 6184 |
| 3890 | 1 | 4830 | 6255 |
| 3891 | 1 | 4830 | 6267 |
| 3892 | 1 | 4830 | 6276 |
| 3893 | 1 | 4831 | 6205 |
| 3894 | 1 | 4831 | 6279 |
| 3895 | 1 | 4831 | 6285 |
| 3896 | 1 | 4831 | 6288 |
| 3897 | 1 | 4832 | 6198 |
| 3898 | 1 | 4832 | 6201 |
| 3899 | 1 | 4832 | 6210 |
| 3900 | 1 | 4832 | 6282 |
| 3901 | 1 | 4833 | 6211 |
| 3902 | 1 | 4833 | 6283 |
| 3903 | 1 | 4833 | 6291 |
| 3904 | 1 | 4833 | 6294 |
| 3905 | 1 | 4834 | 6195 |
| 3906 | 1 | 4834 | 6204 |
| 3907 | 1 | 4834 | 6216 |
| 3908 | 1 | 4834 | 6278 |
| 3909 | 1 | 4835 | 6277 |
| 3910 | 1 | 4835 | 6286 |
| 3911 | 1 | 4835 | 6289 |
| 3912 | 1 | 4835 | 6348 |
| 3913 | 1 | 4836 | 6217 |
| 3914 | 1 | 4836 | 6285 |
| 3915 | 1 | 4836 | 6288 |
| 3916 | 1 | 4836 | 6297 |
| 3917 | 1 | 4836 | 6300 |
| 3918 | 1 | 4836 | 6347 |
| 3919 | 1 | 4837 | 6210 |
| 3920 | 1 | 4837 | 6213 |
| 3921 | 1 | 4837 | 6222 |
| 3922 | 1 | 4837 | 6282 |
| 3923 | 1 | 4837 | 6290 |
| 3924 | 1 | 4837 | 6293 |
| 3925 | 1 | 4838 | 6281 |
| 3926 | 1 | 4838 | 6292 |
| 3927 | 1 | 4838 | 6295 |
| 3928 | 1 | 4838 | 6352 |
| 3929 | 1 | 4839 | 6223 |
| 3930 | 1 | 4839 | 6291 |
| 3931 | 1 | 4839 | 6294 |
| 3932 | 1 | 4839 | 6303 |
| 3933 | 1 | 4839 | 6306 |
| 3934 | 1 | 4839 | 6351 |
| 3935 | 1 | 4840 | 6207 |
| 3936 | 1 | 4840 | 6216 |
| 3937 | 1 | 4840 | 6228 |

|      |   |      |      |
|------|---|------|------|
| 3938 | 1 | 4840 | 6278 |
| 3939 | 1 | 4840 | 6287 |
| 3940 | 1 | 4840 | 6296 |
| 3941 | 1 | 4841 | 6286 |
| 3942 | 1 | 4841 | 6298 |
| 3943 | 1 | 4841 | 6301 |
| 3944 | 1 | 4841 | 6345 |
| 3945 | 1 | 4841 | 6348 |
| 3946 | 1 | 4841 | 6357 |
| 3947 | 1 | 4842 | 6229 |
| 3948 | 1 | 4842 | 6297 |
| 3949 | 1 | 4842 | 6300 |
| 3950 | 1 | 4842 | 6309 |
| 3951 | 1 | 4842 | 6312 |
| 3952 | 1 | 4842 | 6356 |
| 3953 | 1 | 4843 | 6222 |
| 3954 | 1 | 4843 | 6225 |
| 3955 | 1 | 4843 | 6234 |
| 3956 | 1 | 4843 | 6293 |
| 3957 | 1 | 4843 | 6302 |
| 3958 | 1 | 4843 | 6305 |
| 3959 | 1 | 4844 | 6292 |
| 3960 | 1 | 4844 | 6304 |
| 3961 | 1 | 4844 | 6307 |
| 3962 | 1 | 4844 | 6349 |
| 3963 | 1 | 4844 | 6352 |
| 3964 | 1 | 4844 | 6363 |
| 3965 | 1 | 4845 | 6235 |
| 3966 | 1 | 4845 | 6303 |
| 3967 | 1 | 4845 | 6306 |
| 3968 | 1 | 4845 | 6315 |
| 3969 | 1 | 4845 | 6318 |
| 3970 | 1 | 4845 | 6362 |
| 3971 | 1 | 4846 | 6219 |
| 3972 | 1 | 4846 | 6228 |
| 3973 | 1 | 4846 | 6240 |
| 3974 | 1 | 4846 | 6287 |
| 3975 | 1 | 4846 | 6299 |
| 3976 | 1 | 4846 | 6308 |
| 3977 | 1 | 4847 | 6298 |
| 3978 | 1 | 4847 | 6310 |
| 3979 | 1 | 4847 | 6313 |
| 3980 | 1 | 4847 | 6354 |
| 3981 | 1 | 4847 | 6357 |
| 3982 | 1 | 4847 | 6369 |
| 3983 | 1 | 4848 | 6241 |
| 3984 | 1 | 4848 | 6309 |
| 3985 | 1 | 4848 | 6312 |
| 3986 | 1 | 4848 | 6321 |
| 3987 | 1 | 4848 | 6324 |
| 3988 | 1 | 4848 | 6368 |

|      |   |      |      |
|------|---|------|------|
| 3989 | 1 | 4849 | 6234 |
| 3990 | 1 | 4849 | 6237 |
| 3991 | 1 | 4849 | 6246 |
| 3992 | 1 | 4849 | 6305 |
| 3993 | 1 | 4849 | 6314 |
| 3994 | 1 | 4849 | 6317 |
| 3995 | 1 | 4850 | 6304 |
| 3996 | 1 | 4850 | 6316 |
| 3997 | 1 | 4850 | 6319 |
| 3998 | 1 | 4850 | 6360 |
| 3999 | 1 | 4850 | 6363 |
| 4000 | 1 | 4850 | 6375 |
| 4001 | 1 | 4851 | 6247 |
| 4002 | 1 | 4851 | 6315 |
| 4003 | 1 | 4851 | 6318 |
| 4004 | 1 | 4851 | 6327 |
| 4005 | 1 | 4851 | 6330 |
| 4006 | 1 | 4851 | 6374 |
| 4007 | 1 | 4852 | 6231 |
| 4008 | 1 | 4852 | 6240 |
| 4009 | 1 | 4852 | 6252 |
| 4010 | 1 | 4852 | 6299 |
| 4011 | 1 | 4852 | 6311 |
| 4012 | 1 | 4852 | 6320 |
| 4013 | 1 | 4853 | 6310 |
| 4014 | 1 | 4853 | 6322 |
| 4015 | 1 | 4853 | 6325 |
| 4016 | 1 | 4853 | 6366 |
| 4017 | 1 | 4853 | 6369 |
| 4018 | 1 | 4853 | 6381 |
| 4019 | 1 | 4854 | 6253 |
| 4020 | 1 | 4854 | 6321 |
| 4021 | 1 | 4854 | 6324 |
| 4022 | 1 | 4854 | 6333 |
| 4023 | 1 | 4854 | 6336 |
| 4024 | 1 | 4854 | 6380 |
| 4025 | 1 | 4855 | 6246 |
| 4026 | 1 | 4855 | 6249 |
| 4027 | 1 | 4855 | 6258 |
| 4028 | 1 | 4855 | 6317 |
| 4029 | 1 | 4855 | 6326 |
| 4030 | 1 | 4855 | 6329 |
| 4031 | 1 | 4856 | 6316 |
| 4032 | 1 | 4856 | 6328 |
| 4033 | 1 | 4856 | 6331 |
| 4034 | 1 | 4856 | 6372 |
| 4035 | 1 | 4856 | 6375 |
| 4036 | 1 | 4856 | 6387 |
| 4037 | 1 | 4857 | 6259 |
| 4038 | 1 | 4857 | 6327 |
| 4039 | 1 | 4857 | 6330 |

|      |   |      |      |
|------|---|------|------|
| 4040 | 1 | 4857 | 6339 |
| 4041 | 1 | 4857 | 6342 |
| 4042 | 1 | 4857 | 6386 |
| 4043 | 1 | 4858 | 6243 |
| 4044 | 1 | 4858 | 6252 |
| 4045 | 1 | 4858 | 6264 |
| 4046 | 1 | 4858 | 6311 |
| 4047 | 1 | 4858 | 6323 |
| 4048 | 1 | 4858 | 6332 |
| 4049 | 1 | 4859 | 6322 |
| 4050 | 1 | 4859 | 6334 |
| 4051 | 1 | 4859 | 6337 |
| 4052 | 1 | 4859 | 6378 |
| 4053 | 1 | 4859 | 6381 |
| 4054 | 1 | 4860 | 6265 |
| 4055 | 1 | 4860 | 6333 |
| 4056 | 1 | 4860 | 6336 |
| 4057 | 1 | 4861 | 6258 |
| 4058 | 1 | 4861 | 6261 |
| 4059 | 1 | 4861 | 6270 |
| 4060 | 1 | 4861 | 6329 |
| 4061 | 1 | 4861 | 6338 |
| 4062 | 1 | 4861 | 6341 |
| 4063 | 1 | 4862 | 6328 |
| 4064 | 1 | 4862 | 6340 |
| 4065 | 1 | 4862 | 6343 |
| 4066 | 1 | 4862 | 6384 |
| 4067 | 1 | 4862 | 6387 |
| 4068 | 1 | 4863 | 6271 |
| 4069 | 1 | 4863 | 6339 |
| 4070 | 1 | 4863 | 6342 |
| 4071 | 1 | 4864 | 6255 |
| 4072 | 1 | 4864 | 6264 |
| 4073 | 1 | 4864 | 6276 |
| 4074 | 1 | 4864 | 6323 |
| 4075 | 1 | 4864 | 6335 |
| 4076 | 1 | 4864 | 6344 |
| 4077 | 1 | 4865 | 6297 |
| 4078 | 1 | 4865 | 6347 |
| 4079 | 1 | 4865 | 6353 |
| 4080 | 1 | 4865 | 6356 |
| 4081 | 1 | 4866 | 6290 |
| 4082 | 1 | 4866 | 6293 |
| 4083 | 1 | 4866 | 6302 |
| 4084 | 1 | 4866 | 6350 |
| 4085 | 1 | 4867 | 6303 |
| 4086 | 1 | 4867 | 6351 |
| 4087 | 1 | 4867 | 6359 |
| 4088 | 1 | 4867 | 6362 |
| 4089 | 1 | 4868 | 6287 |
| 4090 | 1 | 4868 | 6296 |

|      |   |      |      |
|------|---|------|------|
| 4091 | 1 | 4868 | 6308 |
| 4092 | 1 | 4868 | 6346 |
| 4093 | 1 | 4869 | 6345 |
| 4094 | 1 | 4869 | 6354 |
| 4095 | 1 | 4869 | 6357 |
| 4096 | 1 | 4869 | 6392 |
| 4097 | 1 | 4870 | 6309 |
| 4098 | 1 | 4870 | 6353 |
| 4099 | 1 | 4870 | 6356 |
| 4100 | 1 | 4870 | 6365 |
| 4101 | 1 | 4870 | 6368 |
| 4102 | 1 | 4870 | 6391 |
| 4103 | 1 | 4871 | 6302 |
| 4104 | 1 | 4871 | 6305 |
| 4105 | 1 | 4871 | 6314 |
| 4106 | 1 | 4871 | 6350 |
| 4107 | 1 | 4871 | 6358 |
| 4108 | 1 | 4871 | 6361 |
| 4109 | 1 | 4872 | 6349 |
| 4110 | 1 | 4872 | 6360 |
| 4111 | 1 | 4872 | 6363 |
| 4112 | 1 | 4872 | 6396 |
| 4113 | 1 | 4873 | 6315 |
| 4114 | 1 | 4873 | 6359 |
| 4115 | 1 | 4873 | 6362 |
| 4116 | 1 | 4873 | 6371 |
| 4117 | 1 | 4873 | 6374 |
| 4118 | 1 | 4873 | 6395 |
| 4119 | 1 | 4874 | 6299 |
| 4120 | 1 | 4874 | 6308 |
| 4121 | 1 | 4874 | 6320 |
| 4122 | 1 | 4874 | 6346 |
| 4123 | 1 | 4874 | 6355 |
| 4124 | 1 | 4874 | 6364 |
| 4125 | 1 | 4875 | 6354 |
| 4126 | 1 | 4875 | 6366 |
| 4127 | 1 | 4875 | 6369 |
| 4128 | 1 | 4875 | 6389 |
| 4129 | 1 | 4875 | 6392 |
| 4130 | 1 | 4875 | 6401 |
| 4131 | 1 | 4876 | 6321 |
| 4132 | 1 | 4876 | 6365 |
| 4133 | 1 | 4876 | 6368 |
| 4134 | 1 | 4876 | 6377 |
| 4135 | 1 | 4876 | 6380 |
| 4136 | 1 | 4876 | 6400 |
| 4137 | 1 | 4877 | 6314 |
| 4138 | 1 | 4877 | 6317 |
| 4139 | 1 | 4877 | 6326 |
| 4140 | 1 | 4877 | 6361 |
| 4141 | 1 | 4877 | 6370 |

|      |   |      |      |
|------|---|------|------|
| 4142 | 1 | 4877 | 6373 |
| 4143 | 1 | 4878 | 6360 |
| 4144 | 1 | 4878 | 6372 |
| 4145 | 1 | 4878 | 6375 |
| 4146 | 1 | 4878 | 6393 |
| 4147 | 1 | 4878 | 6396 |
| 4148 | 1 | 4878 | 6407 |
| 4149 | 1 | 4879 | 6327 |
| 4150 | 1 | 4879 | 6371 |
| 4151 | 1 | 4879 | 6374 |
| 4152 | 1 | 4879 | 6383 |
| 4153 | 1 | 4879 | 6386 |
| 4154 | 1 | 4879 | 6406 |
| 4155 | 1 | 4880 | 6311 |
| 4156 | 1 | 4880 | 6320 |
| 4157 | 1 | 4880 | 6332 |
| 4158 | 1 | 4880 | 6355 |
| 4159 | 1 | 4880 | 6367 |
| 4160 | 1 | 4880 | 6376 |
| 4161 | 1 | 4881 | 6366 |
| 4162 | 1 | 4881 | 6378 |
| 4163 | 1 | 4881 | 6381 |
| 4164 | 1 | 4881 | 6398 |
| 4165 | 1 | 4881 | 6401 |
| 4166 | 1 | 4882 | 6333 |
| 4167 | 1 | 4882 | 6377 |
| 4168 | 1 | 4882 | 6380 |
| 4169 | 1 | 4883 | 6326 |
| 4170 | 1 | 4883 | 6329 |
| 4171 | 1 | 4883 | 6338 |
| 4172 | 1 | 4883 | 6373 |
| 4173 | 1 | 4883 | 6382 |
| 4174 | 1 | 4883 | 6385 |
| 4175 | 1 | 4884 | 6372 |
| 4176 | 1 | 4884 | 6384 |
| 4177 | 1 | 4884 | 6387 |
| 4178 | 1 | 4884 | 6404 |
| 4179 | 1 | 4884 | 6407 |
| 4180 | 1 | 4885 | 6339 |
| 4181 | 1 | 4885 | 6383 |
| 4182 | 1 | 4885 | 6386 |
| 4183 | 1 | 4886 | 6323 |
| 4184 | 1 | 4886 | 6332 |
| 4185 | 1 | 4886 | 6344 |
| 4186 | 1 | 4886 | 6367 |
| 4187 | 1 | 4886 | 6379 |
| 4188 | 1 | 4886 | 6388 |
| 4189 | 1 | 4887 | 6365 |
| 4190 | 1 | 4887 | 6391 |
| 4191 | 1 | 4887 | 6397 |
| 4192 | 1 | 4887 | 6400 |

|      |   |      |      |
|------|---|------|------|
| 4193 | 1 | 4888 | 6358 |
| 4194 | 1 | 4888 | 6361 |
| 4195 | 1 | 4888 | 6370 |
| 4196 | 1 | 4888 | 6394 |
| 4197 | 1 | 4889 | 6371 |
| 4198 | 1 | 4889 | 6395 |
| 4199 | 1 | 4889 | 6403 |
| 4200 | 1 | 4889 | 6406 |
| 4201 | 1 | 4890 | 6355 |
| 4202 | 1 | 4890 | 6364 |
| 4203 | 1 | 4890 | 6376 |
| 4204 | 1 | 4890 | 6390 |
| 4205 | 1 | 4891 | 6389 |
| 4206 | 1 | 4891 | 6398 |
| 4207 | 1 | 4891 | 6401 |
| 4208 | 1 | 4892 | 6377 |
| 4209 | 1 | 4892 | 6397 |
| 4210 | 1 | 4892 | 6400 |
| 4211 | 1 | 4893 | 6370 |
| 4212 | 1 | 4893 | 6373 |
| 4213 | 1 | 4893 | 6382 |
| 4214 | 1 | 4893 | 6394 |
| 4215 | 1 | 4893 | 6402 |
| 4216 | 1 | 4893 | 6405 |
| 4217 | 1 | 4894 | 6393 |
| 4218 | 1 | 4894 | 6404 |
| 4219 | 1 | 4894 | 6407 |
| 4220 | 1 | 4895 | 6383 |
| 4221 | 1 | 4895 | 6403 |
| 4222 | 1 | 4895 | 6406 |
| 4223 | 1 | 4896 | 6367 |
| 4224 | 1 | 4896 | 6376 |
| 4225 | 1 | 4896 | 6388 |
| 4226 | 1 | 4896 | 6390 |
| 4227 | 1 | 4896 | 6399 |
| 4228 | 1 | 4896 | 6408 |
| 4229 | 1 | 4367 | 4901 |
| 4230 | 1 | 4368 | 4907 |
| 4231 | 1 | 4435 | 4917 |
| 4232 | 1 | 4436 | 4897 |
| 4233 | 1 | 4436 | 4900 |
| 4234 | 1 | 4436 | 4916 |
| 4235 | 1 | 4438 | 4923 |
| 4236 | 1 | 4439 | 4903 |
| 4237 | 1 | 4439 | 4906 |
| 4238 | 1 | 4439 | 4922 |
| 4239 | 1 | 4507 | 4957 |
| 4240 | 1 | 4508 | 4913 |
| 4241 | 1 | 4508 | 4916 |
| 4242 | 1 | 4508 | 4956 |
| 4243 | 1 | 4510 | 4963 |



|      |   |      |      |
|------|---|------|------|
| 4244 | 1 | 4511 | 4919 |
| 4245 | 1 | 4511 | 4922 |
| 4246 | 1 | 4511 | 4962 |
| 4247 | 1 | 4579 | 5021 |
| 4248 | 1 | 4580 | 4953 |
| 4249 | 1 | 4580 | 4956 |
| 4250 | 1 | 4580 | 5020 |
| 4251 | 1 | 4582 | 5027 |
| 4252 | 1 | 4583 | 4959 |
| 4253 | 1 | 4583 | 4962 |
| 4254 | 1 | 4583 | 5026 |
| 4255 | 1 | 4651 | 5109 |
| 4256 | 1 | 4652 | 5017 |
| 4257 | 1 | 4652 | 5020 |
| 4258 | 1 | 4652 | 5108 |
| 4259 | 1 | 4654 | 5115 |
| 4260 | 1 | 4655 | 5023 |
| 4261 | 1 | 4655 | 5026 |
| 4262 | 1 | 4655 | 5114 |
| 4263 | 1 | 4721 | 5221 |
| 4264 | 1 | 4722 | 5105 |
| 4265 | 1 | 4722 | 5108 |
| 4266 | 1 | 4722 | 5220 |
| 4267 | 1 | 4724 | 5227 |
| 4268 | 1 | 4725 | 5111 |
| 4269 | 1 | 4725 | 5114 |
| 4270 | 1 | 4725 | 5226 |
| 4271 | 1 | 4779 | 5357 |
| 4272 | 1 | 4780 | 5217 |
| 4273 | 1 | 4780 | 5220 |
| 4274 | 1 | 4780 | 5356 |
| 4275 | 1 | 4782 | 5363 |
| 4276 | 1 | 4783 | 5223 |
| 4277 | 1 | 4783 | 5226 |
| 4278 | 1 | 4783 | 5362 |
| 4279 | 1 | 4825 | 5501 |
| 4280 | 1 | 4826 | 5353 |
| 4281 | 1 | 4826 | 5356 |
| 4282 | 1 | 4826 | 5500 |
| 4283 | 1 | 4828 | 5507 |
| 4284 | 1 | 4829 | 5359 |
| 4285 | 1 | 4829 | 5362 |
| 4286 | 1 | 4829 | 5506 |
| 4287 | 1 | 4859 | 5645 |
| 4288 | 1 | 4860 | 5497 |
| 4289 | 1 | 4860 | 5500 |
| 4290 | 1 | 4860 | 5644 |
| 4291 | 1 | 4862 | 5651 |
| 4292 | 1 | 4863 | 5503 |
| 4293 | 1 | 4863 | 5506 |
| 4294 | 1 | 4863 | 5650 |

|      |   |      |      |
|------|---|------|------|
| 4295 | 1 | 4881 | 5789 |
| 4296 | 1 | 4882 | 5641 |
| 4297 | 1 | 4882 | 5644 |
| 4298 | 1 | 4882 | 5788 |
| 4299 | 1 | 4884 | 5795 |
| 4300 | 1 | 4885 | 5647 |
| 4301 | 1 | 4885 | 5650 |
| 4302 | 1 | 4885 | 5794 |
| 4303 | 1 | 4891 | 5932 |
| 4304 | 1 | 4892 | 5785 |
| 4305 | 1 | 4892 | 5788 |
| 4306 | 1 | 4892 | 5931 |
| 4307 | 1 | 4894 | 5936 |
| 4308 | 1 | 4895 | 5791 |
| 4309 | 1 | 4895 | 5794 |
| 4310 | 1 | 4895 | 5935 |
| 4311 | 1 | 4141 | 5486 |
| 4312 | 1 | 4143 | 5350 |
| 4313 | 1 | 4143 | 5493 |
| 4314 | 1 | 4144 | 5492 |
| 4315 | 1 | 4146 | 5352 |
| 4316 | 1 | 4146 | 5487 |
| 4317 | 1 | 4149 | 5630 |
| 4318 | 1 | 4151 | 5490 |
| 4319 | 1 | 4151 | 5493 |
| 4320 | 1 | 4151 | 5637 |
| 4321 | 1 | 4152 | 5636 |
| 4322 | 1 | 4154 | 5487 |
| 4323 | 1 | 4154 | 5496 |
| 4324 | 1 | 4154 | 5631 |
| 4325 | 1 | 4169 | 5774 |
| 4326 | 1 | 4171 | 5634 |
| 4327 | 1 | 4171 | 5637 |
| 4328 | 1 | 4171 | 5781 |
| 4329 | 1 | 4172 | 5780 |
| 4330 | 1 | 4174 | 5631 |
| 4331 | 1 | 4174 | 5640 |
| 4332 | 1 | 4174 | 5775 |
| 4333 | 1 | 4201 | 5918 |
| 4334 | 1 | 4203 | 5778 |
| 4335 | 1 | 4203 | 5781 |
| 4336 | 1 | 4203 | 5925 |
| 4337 | 1 | 4204 | 5924 |
| 4338 | 1 | 4206 | 5775 |
| 4339 | 1 | 4206 | 5784 |
| 4340 | 1 | 4206 | 5919 |
| 4341 | 1 | 4245 | 6058 |
| 4342 | 1 | 4247 | 5922 |
| 4343 | 1 | 4247 | 5925 |
| 4344 | 1 | 4247 | 6065 |
| 4345 | 1 | 4248 | 6064 |

|      |   |      |      |
|------|---|------|------|
| 4346 | 1 | 4250 | 5919 |
| 4347 | 1 | 4250 | 5928 |
| 4348 | 1 | 4250 | 6059 |
| 4349 | 1 | 4301 | 6174 |
| 4350 | 1 | 4303 | 6062 |
| 4351 | 1 | 4303 | 6065 |
| 4352 | 1 | 4303 | 6181 |
| 4353 | 1 | 4304 | 6180 |
| 4354 | 1 | 4306 | 6059 |
| 4355 | 1 | 4306 | 6068 |
| 4356 | 1 | 4306 | 6175 |
| 4357 | 1 | 4369 | 6266 |
| 4358 | 1 | 4371 | 6178 |
| 4359 | 1 | 4371 | 6181 |
| 4360 | 1 | 4371 | 6273 |
| 4361 | 1 | 4372 | 6272 |
| 4362 | 1 | 4374 | 6175 |
| 4363 | 1 | 4374 | 6184 |
| 4364 | 1 | 4374 | 6267 |
| 4365 | 1 | 4441 | 6334 |
| 4366 | 1 | 4443 | 6270 |
| 4367 | 1 | 4443 | 6273 |
| 4368 | 1 | 4443 | 6341 |
| 4369 | 1 | 4444 | 6340 |
| 4370 | 1 | 4446 | 6267 |
| 4371 | 1 | 4446 | 6276 |
| 4372 | 1 | 4446 | 6335 |
| 4373 | 1 | 4513 | 6378 |
| 4374 | 1 | 4515 | 6338 |
| 4375 | 1 | 4515 | 6341 |
| 4376 | 1 | 4515 | 6385 |
| 4377 | 1 | 4516 | 6384 |
| 4378 | 1 | 4518 | 6335 |
| 4379 | 1 | 4518 | 6344 |
| 4380 | 1 | 4518 | 6379 |
| 4381 | 1 | 4585 | 6398 |
| 4382 | 1 | 4587 | 6382 |
| 4383 | 1 | 4587 | 6385 |
| 4384 | 1 | 4587 | 6405 |
| 4385 | 1 | 4588 | 6404 |
| 4386 | 1 | 4590 | 6379 |
| 4387 | 1 | 4590 | 6388 |
| 4388 | 1 | 4590 | 6399 |
| 4389 | 1 | 4658 | 6402 |
| 4390 | 1 | 4658 | 6405 |
| 4391 | 1 | 4660 | 6399 |
| 4392 | 1 | 4660 | 6408 |

#####end-of-the-data-file#####

LAMMPS input file:

#####beginning-of-the-input-file#####

# Li7P2S8I-input

units real  
boundary p p p

atom\_style full  
bond\_style harmonic  
angle\_style harmonic

read\_data LiPSI.data

pair\_style hybrid/overlay reax/c NULL checkqeq no lj/cut/coul/cut 12.0 morse 5

pair\_coeff \* \* reax/c CHOLiLvCu\_co-v2.ff Li Li Li P S NULL NULL NULL NULL Li Li

#LJ parameters

|              |    |                 |       |     |                               |
|--------------|----|-----------------|-------|-----|-------------------------------|
| pair_coeff 1 | 1  | lj/cut/coul/cut | 0.000 | 3.1 | #Li(anode)-Li(anode)          |
| pair_coeff 1 | 2  | lj/cut/coul/cut | 0.000 | 2.8 | #Li(anode)-Li(SE)             |
| pair_coeff 1 | 3  | lj/cut/coul/cut | 0.000 | 2.3 | #Li(anode)-Li(cathode)        |
| pair_coeff 1 | 4  | lj/cut/coul/cut | 0.000 | 2.6 | #Li(anode)-P(SE)              |
| pair_coeff 1 | 5  | lj/cut/coul/cut | 0.000 | 2.1 | #Li(anode)-S(SE)              |
| pair_coeff 1 | 6  | lj/cut/coul/cut | 0.500 | 2.5 | #Li(anode)-I(SE)              |
| pair_coeff 1 | 7  | lj/cut/coul/cut | 0.285 | 3.4 | #Li(anode)-Co(cathode)        |
| pair_coeff 1 | 8  | lj/cut/coul/cut | 0.285 | 3.4 | #Li(anode)-O(cathode)         |
| pair_coeff 1 | 9  | lj/cut/coul/cut | 2.550 | 2.4 | #Li(anode)-Al(cathode)        |
| pair_coeff 1 | 10 | lj/cut/coul/cut | 2.550 | 2.4 | #Li(anode)-Cu(cathode)        |
| pair_coeff 1 | 11 | lj/cut/coul/cut | 0.000 | 2.8 | #Li(anode)-Li(cathode-temp)   |
| pair_coeff 1 | 12 | lj/cut/coul/cut | 0.000 | 2.8 | #Li(anode)-Li(anode-temp)     |
| pair_coeff 2 | 2  | lj/cut/coul/cut | 0.000 | 1.4 | #Li(SE)-Li(SE)                |
| pair_coeff 2 | 3  | lj/cut/coul/cut | 0.000 | 2.5 | #Li(SE)-Li(cathode)           |
| pair_coeff 2 | 4  | lj/cut/coul/cut | 0.000 | 2.6 | #Li(SE)-P(SE)                 |
| pair_coeff 2 | 5  | lj/cut/coul/cut | 0.000 | 2.1 | #Li(SE)-S(SE)                 |
| pair_coeff 2 | 6  | lj/cut/coul/cut | 0.500 | 2.5 | #Li(SE)-I(SE)                 |
| pair_coeff 2 | 7  | lj/cut/coul/cut | 0.285 | 2.5 | #Li(SE)-Co(cathode)           |
| pair_coeff 2 | 8  | lj/cut/coul/cut | 0.285 | 1.4 | #Li(SE)-O(cathode)            |
| pair_coeff 2 | 9  | lj/cut/coul/cut | 2.550 | 3.0 | #Li(SE)-Al(cathode)           |
| pair_coeff 2 | 10 | lj/cut/coul/cut | 2.550 | 3.0 | #Li(SE)-Cu(cathode)           |
| pair_coeff 2 | 11 | lj/cut/coul/cut | 0.000 | 2.8 | #Li(SE)-Li(cathode-temp)      |
| pair_coeff 2 | 12 | lj/cut/coul/cut | 0.000 | 2.8 | #Li(SE)-Li(anode-temp)        |
| pair_coeff 3 | 3  | lj/cut/coul/cut | 0.000 | 2.1 | #Li(cathode)-Li(cathode)      |
| pair_coeff 3 | 4  | lj/cut/coul/cut | 0.000 | 3.3 | #Li(cathode)-P(SE)            |
| pair_coeff 3 | 5  | lj/cut/coul/cut | 0.000 | 3.3 | #Li(cathode)-S(SE)            |
| pair_coeff 3 | 6  | lj/cut/coul/cut | 0.500 | 3.3 | #Li(cathode)-I(SE)            |
| pair_coeff 3 | 7  | lj/cut/coul/cut | 0.285 | 3.2 | #Li(cathode)-Co(cathode)      |
| pair_coeff 3 | 8  | lj/cut/coul/cut | 0.285 | 1.2 | #Li(cathode)-O(cathode)       |
| pair_coeff 3 | 9  | lj/cut/coul/cut | 2.550 | 3.4 | #Li(cathode)-Al(cathode)      |
| pair_coeff 3 | 10 | lj/cut/coul/cut | 2.550 | 2.4 | #Li(cathode)-Cu(cathode)      |
| pair_coeff 3 | 11 | lj/cut/coul/cut | 0.000 | 2.5 | #Li(cathode)-Li(cathode-temp) |

|              |    |                 |       |     |                               |
|--------------|----|-----------------|-------|-----|-------------------------------|
| pair_coeff 3 | 12 | lj/cut/coul/cut | 0.000 | 2.5 | #Li(cathode)-Li(anode-temp)   |
| pair_coeff 4 | 4  | lj/cut/coul/cut | 0.000 | 5.7 | #P(SE)-P(SE)                  |
| pair_coeff 4 | 5  | lj/cut/coul/cut | 0.000 | 2.2 | #P(SE)-S(SE)                  |
| pair_coeff 4 | 6  | lj/cut/coul/cut | 0.100 | 2.5 | #P(SE)-I(SE)                  |
| pair_coeff 4 | 7  | lj/cut/coul/cut | 0.582 | 3.4 | #P(SE)-Co(cathode)            |
| pair_coeff 4 | 8  | lj/cut/coul/cut | 0.582 | 3.4 | #P(SE)-O(cathode)             |
| pair_coeff 4 | 9  | lj/cut/coul/cut | 0.017 | 3.5 | #P(SE)-Al(cathode)            |
| pair_coeff 4 | 10 | lj/cut/coul/cut | 0.017 | 3.5 | #P(SE)-Cu(cathode)            |
| pair_coeff 4 | 11 | lj/cut/coul/cut | 0.000 | 2.6 | #P(SE)-Li(cathode-temp)       |
| pair_coeff 4 | 12 | lj/cut/coul/cut | 0.000 | 2.6 | #P(SE)-Li(anode-temp)         |
| pair_coeff 5 | 5  | lj/cut/coul/cut | 0.000 | 3.8 | #S(SE)-S(SE)                  |
| pair_coeff 5 | 6  | lj/cut/coul/cut | 0.100 | 4.0 | #S(SE)-I(SE)                  |
| pair_coeff 5 | 7  | lj/cut/coul/cut | 0.582 | 3.4 | #S(SE)-Co(cathode)            |
| pair_coeff 5 | 8  | lj/cut/coul/cut | 0.058 | 3.0 | #S(SE)-O(cathode)             |
| pair_coeff 5 | 9  | lj/cut/coul/cut | 0.017 | 3.5 | #S(SE)-Al(cathode)            |
| pair_coeff 5 | 10 | lj/cut/coul/cut | 0.017 | 3.5 | #S(SE)-Cu(cathode)            |
| pair_coeff 5 | 11 | lj/cut/coul/cut | 0.000 | 2.1 | #S(SE)-Li(cathode-temp)       |
| pair_coeff 5 | 12 | lj/cut/coul/cut | 0.000 | 2.1 | #S(SE)-Li(anode-temp)         |
| pair_coeff 6 | 6  | lj/cut/coul/cut | 5.000 | 4.9 | #I(SE)-I(SE)                  |
| pair_coeff 6 | 7  | lj/cut/coul/cut | 0.582 | 3.4 | #I(SE)-Co(cathode)            |
| pair_coeff 6 | 8  | lj/cut/coul/cut | 0.582 | 3.4 | #I(SE)-O(cathode)             |
| pair_coeff 6 | 9  | lj/cut/coul/cut | 0.017 | 3.5 | #I(SE)-Al(cathode)            |
| pair_coeff 6 | 10 | lj/cut/coul/cut | 0.017 | 3.5 | #I(SE)-Cu(cathode)            |
| pair_coeff 6 | 11 | lj/cut/coul/cut | 0.050 | 2.5 | #I(SE)-Li(cathode-temp)       |
| pair_coeff 6 | 12 | lj/cut/coul/cut | 0.050 | 2.5 | #I(SE)-Li(anode-temp)         |
| pair_coeff 7 | 7  | lj/cut/coul/cut | 0.186 | 3.4 | #Co(cathode)-Co(cathode)      |
| pair_coeff 7 | 8  | lj/cut/coul/cut | 0.000 | 3.4 | #Co(cathode)-O(cathode)       |
| pair_coeff 7 | 9  | lj/cut/coul/cut | 0.010 | 2.4 | #Co(cathode)-Al(cathode)      |
| pair_coeff 7 | 10 | lj/cut/coul/cut | 2.550 | 2.4 | #Co(cathode)-Cu(cathode)      |
| pair_coeff 7 | 11 | lj/cut/coul/cut | 0.079 | 2.5 | #Co(cathode)-Li(cathode-temp) |
| pair_coeff 7 | 12 | lj/cut/coul/cut | 0.079 | 2.5 | #Co(cathode)-Li(anode-temp)   |
| pair_coeff 8 | 8  | lj/cut/coul/cut | 0.595 | 2.8 | #O(cathode)-O(cathode)        |
| pair_coeff 8 | 9  | lj/cut/coul/cut | 0.010 | 2.4 | #O(cathode)-Al(cathode)       |
| pair_coeff 8 | 10 | lj/cut/coul/cut | 2.550 | 2.4 | #O(cathode)-Cu(cathode)       |
| pair_coeff 8 | 11 | lj/cut/coul/cut | 0.079 | 1.4 | #O(cathode)-Li(cathode-temp)  |
| pair_coeff 8 | 12 | lj/cut/coul/cut | 0.079 | 1.4 | #O(cathode)-Li(anode-temp)    |
| pair_coeff 9 | 9  | lj/cut/coul/cut | 1.006 | 2.5 | #Al(cathode)-Al(cathode)      |
| pair_coeff 9 | 10 | lj/cut/coul/cut | 0.010 | 2.4 | #Al(cathode)-Cu(cathode)      |
| pair_coeff 9 | 11 | lj/cut/coul/cut | 0.011 | 3.0 | #Al(cathode)-Li(cathode-temp) |
| pair_coeff 9 | 12 | lj/cut/coul/cut | 0.011 | 3.0 | #Al(cathode)-Li(anode-temp)   |

|                                   |    |                 |       |     |                                 |
|-----------------------------------|----|-----------------|-------|-----|---------------------------------|
| pair_coeff 10                     | 10 | lj/cut/coul/cut | 2.506 | 2.3 | #Cu(cathode)-Cu(cathode)        |
| pair_coeff 10<br>temp)            | 11 | lj/cut/coul/cut | 0.011 | 3.0 | #Cu(cathode)-Li(cathode-        |
| pair_coeff 10<br>temp)            | 12 | lj/cut/coul/cut | 0.011 | 3.0 | #Cu(cathode)-Li(anode-          |
| pair_coeff 11<br>Li(cathode-temp) | 11 | lj/cut/coul/cut | 0.000 | 2.8 | #Li(cathode-temp)-              |
| pair_coeff 11<br>temp)            | 12 | lj/cut/coul/cut | 0.000 | 2.8 | #Li(cathode-temp)-Li(anode-     |
| pair_coeff 12<br>temp)            | 12 | lj/cut/coul/cut | 0.000 | 1.4 | #Li(anode-temp)-Li(anode-       |
| #morse parameters                 |    |                 |       |     |                                 |
| pair_coeff 1                      | 1  | morse           | 0.00  | 1.0 | 1.0 #Li(anode)-Li(anode)        |
| pair_coeff 1                      | 2  | morse           | 0.00  | 1.0 | 1.0 #Li(anode)-Li(SE)           |
| pair_coeff 1                      | 3  | morse           | 0.00  | 1.0 | 1.0 #Li(anode)-Li(cathode)      |
| pair_coeff 1                      | 4  | morse           | 0.00  | 1.0 | 1.0 #Li(anode)-P(SE)            |
| pair_coeff 1                      | 5  | morse           | 0.00  | 1.0 | 1.0 #Li(anode)-S(SE)            |
| pair_coeff 1                      | 6  | morse           | 0.00  | 1.0 | 1.0 #Li(anode)-I(SE)            |
| pair_coeff 1                      | 7  | morse           | 0.00  | 1.0 | 1.0 #Li(anode)-Co(cathode)      |
| pair_coeff 1                      | 8  | morse           | 0.00  | 1.0 | 1.0 #Li(anode)-O(cathode)       |
| pair_coeff 1                      | 9  | morse           | 0.00  | 1.0 | 1.0 #Li(anode)-Al(cathode)      |
| pair_coeff 1                      | 10 | morse           | 0.00  | 1.0 | 1.0 #Li(anode)-Cu(cathode)      |
| pair_coeff 1                      | 11 | morse           | 0.00  | 1.0 | 1.0 #Li(anode)-Li(cathode-temp) |
| pair_coeff 1                      | 12 | morse           | 0.00  | 1.0 | 1.0 #Li(anode)-Li(anode-temp)   |
| pair_coeff 2                      | 2  | morse           | 0.00  | 1.0 | 1.0 #Li(SE)-Li(SE)              |
| pair_coeff 2                      | 3  | morse           | 0.00  | 1.0 | 1.0 #Li(SE)-Li(cathode)         |
| pair_coeff 2                      | 4  | morse           | 0.00  | 1.0 | 1.0 #Li(SE)-P(SE)               |
| pair_coeff 2                      | 5  | morse           | 0.00  | 1.0 | 1.0 #Li(SE)-S(SE)               |
| pair_coeff 2                      | 6  | morse           | 0.00  | 1.0 | 1.0 #Li(SE)-I(SE)               |
| pair_coeff 2                      | 7  | morse           | 0.00  | 1.0 | 1.0 #Li(SE)-Co(cathode)         |
| pair_coeff 2                      | 8  | morse           | 0.00  | 1.0 | 1.0 #Li(SE)-O(cathode)          |
| pair_coeff 2                      | 9  | morse           | 0.00  | 1.0 | 1.0 #Li(SE)-Al(cathode)         |
| pair_coeff 2                      | 10 | morse           | 0.00  | 1.0 | 1.0 #Li(SE)-Cu(cathode)         |
| pair_coeff 2                      | 11 | morse           | 0.00  | 1.0 | 1.0 #Li(SE)-Li(cathode-temp)    |
| pair_coeff 2                      | 12 | morse           | 0.00  | 1.0 | 1.0 #Li(SE)-Li(anode-temp)      |
| pair_coeff 3                      | 3  | morse           | 0.00  | 1.0 | 1.0 #Li(cathode)-Li(cathode)    |
| pair_coeff 3                      | 4  | morse           | 0.00  | 1.0 | 1.0 #Li(cathode)-P(SE)          |
| pair_coeff 3                      | 5  | morse           | 0.00  | 1.0 | 1.0 #Li(cathode)-S(SE)          |
| pair_coeff 3                      | 6  | morse           | 0.00  | 1.0 | 1.0 #Li(cathode)-I(SE)          |
| pair_coeff 3                      | 7  | morse           | 0.00  | 1.0 | 1.0 #Li(cathode)-Co(cathode)    |
| pair_coeff 3                      | 8  | morse           | 0.00  | 1.0 | 1.0 #Li(cathode)-O(cathode)     |
| pair_coeff 3                      | 9  | morse           | 0.00  | 1.0 | 1.0 #Li(cathode)-Al(cathode)    |
| pair_coeff 3                      | 10 | morse           | 0.00  | 1.0 | 1.0 #Li(cathode)-Cu(cathode)    |
| pair_coeff 3<br>temp)             | 11 | morse           | 0.00  | 1.0 | 1.0 #Li(cathode)-Li(cathode-    |
| pair_coeff 3                      | 12 | morse           | 0.00  | 1.0 | 1.0 #Li(cathode)-Li(anode-temp) |

|               |    |       |       |     |     |                               |
|---------------|----|-------|-------|-----|-----|-------------------------------|
| pair_coeff 4  | 4  | morse | 0.00  | 1.0 | 1.0 | #P(SE)-P(SE)                  |
| pair_coeff 4  | 5  | morse | 36.44 | 2.0 | 2.1 | #P(SE)-S(SE)                  |
| pair_coeff 4  | 6  | morse | 41.97 | 1.6 | 2.5 | #P(SE)-I(SE)                  |
| pair_coeff 4  | 7  | morse | 0.00  | 1.0 | 1.0 | #P(SE)-Co(cathode)            |
| pair_coeff 4  | 8  | morse | 0.00  | 1.0 | 1.0 | #P(SE)-O(cathode)             |
| pair_coeff 4  | 9  | morse | 0.00  | 1.0 | 1.0 | #P(SE)-Al(cathode)            |
| pair_coeff 4  | 10 | morse | 0.00  | 1.0 | 1.0 | #P(SE)-Cu(cathode)            |
| pair_coeff 4  | 11 | morse | 0.00  | 1.0 | 1.0 | #P(SE)-Li(cathode-temp)       |
| pair_coeff 4  | 12 | morse | 0.00  | 1.0 | 1.0 | #P(SE)-Li(anode-temp)         |
| pair_coeff 5  | 5  | morse | 0.00  | 1.0 | 1.0 | #S(SE)-S(SE)                  |
| pair_coeff 5  | 6  | morse | 0.00  | 1.0 | 1.0 | #S(SE)-I(SE)                  |
| pair_coeff 5  | 7  | morse | 0.00  | 1.0 | 1.0 | #S(SE)-Co(cathode)            |
| pair_coeff 5  | 8  | morse | 0.00  | 1.0 | 1.0 | #S(SE)-O(cathode)             |
| pair_coeff 5  | 9  | morse | 0.00  | 1.0 | 1.0 | #S(SE)-Al(cathode)            |
| pair_coeff 5  | 10 | morse | 0.00  | 1.0 | 1.0 | #S(SE)-Cu(cathode)            |
| pair_coeff 5  | 11 | morse | 0.00  | 1.0 | 1.0 | #S(SE)-Li(cathode-temp)       |
| pair_coeff 5  | 12 | morse | 0.00  | 1.0 | 1.0 | #S(SE)-Li(anode-temp)         |
| pair_coeff 6  | 6  | morse | 0.00  | 1.0 | 1.0 | #I(SE)-I(SE)                  |
| pair_coeff 6  | 7  | morse | 0.00  | 1.0 | 1.0 | #I(SE)-Co(cathode)            |
| pair_coeff 6  | 8  | morse | 0.00  | 1.0 | 1.0 | #I(SE)-O(cathode)             |
| pair_coeff 6  | 9  | morse | 0.00  | 1.0 | 1.0 | #I(SE)-Al(cathode)            |
| pair_coeff 6  | 10 | morse | 0.00  | 1.0 | 1.0 | #I(SE)-Cu(cathode)            |
| pair_coeff 6  | 11 | morse | 0.00  | 1.0 | 1.0 | #I(SE)-Li(cathode-temp)       |
| pair_coeff 6  | 12 | morse | 0.00  | 1.0 | 1.0 | #I(SE)-Li(anode-temp)         |
| pair_coeff 7  | 7  | morse | 0.00  | 1.0 | 1.0 | #Co(cathode)-Co(cathode)      |
| pair_coeff 7  | 8  | morse | 0.00  | 1.0 | 1.0 | #Co(cathode)-O(cathode)       |
| pair_coeff 7  | 9  | morse | 0.00  | 1.0 | 1.0 | #Co(cathode)-Al(cathode)      |
| pair_coeff 7  | 10 | morse | 0.00  | 1.0 | 1.0 | #Co(cathode)-Cu(cathode)      |
| pair_coeff 7  | 11 | morse | 0.00  | 1.0 | 1.0 | #Co(cathode)-Li(cathode-temp) |
| pair_coeff 7  | 12 | morse | 0.00  | 1.0 | 1.0 | #Co(cathode)-Li(anode-temp)   |
| pair_coeff 8  | 8  | morse | 0.00  | 1.0 | 1.0 | #O(cathode)-O(cathode)        |
| pair_coeff 8  | 9  | morse | 0.00  | 1.0 | 1.0 | #O(cathode)-Al(cathode)       |
| pair_coeff 8  | 10 | morse | 0.00  | 1.0 | 1.0 | #O(cathode)-Cu(cathode)       |
| pair_coeff 8  | 11 | morse | 0.00  | 1.0 | 1.0 | #O(cathode)-Li(cathode-temp)  |
| pair_coeff 8  | 12 | morse | 0.00  | 1.0 | 1.0 | #O(cathode)-Li(anode-temp)    |
| pair_coeff 9  | 9  | morse | 0.00  | 1.0 | 1.0 | #Al(cathode)-Al(cathode)      |
| pair_coeff 9  | 10 | morse | 0.00  | 1.0 | 1.0 | #Al(cathode)-Cu(cathode)      |
| pair_coeff 9  | 11 | morse | 0.00  | 1.0 | 1.0 | #Al(cathode)-Li(cathode-temp) |
| pair_coeff 9  | 12 | morse | 0.00  | 1.0 | 1.0 | #Al(cathode)-Li(anode-temp)   |
| pair_coeff 10 | 10 | morse | 0.00  | 1.0 | 1.0 | #Cu(cathode)-Cu(cathode)      |

```

pair_coeff 10      11      morse    0.00    1.0      1.0      #Cu(cathode)-Li(cathode-
temp)
pair_coeff 10      12      morse    0.00    1.0      1.0      #Cu(cathode)-Li(anode-
temp)

pair_coeff 11      11      morse    0.00    1.0      1.0      #Li(cathode-temp)-
Li(cathode-temp)
pair_coeff 11      12      morse    0.00    1.0      1.0      #Li(cathode-temp)-Li(anode-
temp)

pair_coeff 12      12      morse    0.00    1.0      1.0      #Li(anode-temp)-Li(anode-
temp)

```

```

neighbor 0.1 bin
neigh_modify every 1 delay 0 check yes

```

```

#set the atoms charges, the others are defined in the data file

```

```

set      type 2      charge 1 #Li
set      type 4      charge 5 #P
set      type 5      charge -2 #S
set      type 6      charge -1 #I
set      type 3      charge 0.0 #Li-cath
set      type 7      charge 0.0 #Co-cath

```

```

velocity all create 5.0 12345678 dist uniform
timestep 0.1
restart 1000 batt2.restart1 batt2.restart2

```

```

compute 1 all pe/atom
compute 2 all ke/atom

```

```

# =====
# minimization
# =====
dump      1 all custom 1 min.dump id mol type x y z q c_1 c_2 vx vy vz
minimize 1e-5 1e-5 10000 100000
undump    1
reset_timestep 0

```

```

# =====
# molecular dynamics
# =====

```

```

# thermodynamic data

```

```

thermo_style      custom step temp press pe ke etotal vol
thermo            100

```

```

#equilibration at 5K

```

```

dump      2 all custom 1000 equil5k.dump id mol type x y z q c_1 c_2 vx vy vz
fix      2 all npt temp 5.0 5.0 50 iso 1 1 500
run      2000000
undump    2
unfix    2
#heating

```



```
dump      3 all custom 1000 heating.dump id mol type x y z q c_1 c_2 vx vy vz
fix       3 all npt temp 5.0 300.0 50 iso 1 1 500
run       2000000
undump    3
unfix     3
#equilibration at 300K
dump      4 all custom 1000 equil300k.dump id mol type x y z q c_1 c_2 vx vy vz
fix       4 all npt temp 300.0 300.0 50 iso 1 1 500
run       2000000
undump    4
unfix     4
#####end-of-the-input-file#####
```
